# Supplementary material for: CDK4/6 Inhibitor as a Novel Therapeutic Approach for Advanced Bladder Cancer Independently of RB1 Status
Source: Oxford University Press journal article supplement (doi:10.1158/1078-0432.ccr-18-0685), 2018-09-21
Supplement: 10780432ccr180685-sup-197850_4_supp_5032067_pf3741.xlsx [file 10780432ccr180685-sup-197850_4_supp_5032067_pf3741.xlsx]

## Sheet: Gene list discriminating 6 grou
Original row	Probe Set ID	Gene Symbol	mRNA Accession	mRNA Source	mRna - Description	mRNA - xhyb	Chromosome	GO Biological Process ID	GO Biological Process Term	GO Cellular Component ID	GO Cellular Component Term	GO Molecular Function ID	GO Molecular Function Term	Pathway Source	Pathway Name	CHR_LOCATION	PROBE_ID	5637 C1	5637 C2	5637 C3	5637 PB1	5637 PB2	5637 PB3	J82C1	J82C2	J82C3	J82PB1	J82PB2	J82PB3	RT112C1	RT112C2	RT112C3	RT112PB1	RT112PB2	RT112PB3
1	TC01000012.hg.1	RP5-857K21.2	OTTHUMT00000006706	Havana transcript	cdna:all chromosome:VEGA56:1:587668:594574:1 Gene:OTTHUMG00000002329	FALSE	chr1	---	---	---	---	---	---	---	---	chrNA:-1--1	TC01000012.hg.1	5.9448	5.44074	5.90908	5.66485	5.73172	5.3291	5.9993	5.81054	5.54177	5.43226	5.47202	5.84453	6.28882	6.42457	6.05934	6.84262	7.24478	6.95094
2	TC01000113.hg.1	H6PD	NM_004285	RefSeq	Homo sapiens hexose-6-phosphate dehydrogenase (glucose 1-dehydrogenase) (H6PD), transcript variant 2, mRNA.	FALSE	chr1	GO:0006098 // GO:0097305 // GO:0005975 // GO:0006006 // GO:0006739 // GO:0008152 // GO:0055114	pentose-phosphate shunt // response to alcohol // carbohydrate metabolic process // glucose metabolic process // NADP metabolic process // metabolic process // oxidation-reduction process	GO:0005739 // GO:0005788 // GO:0005737 // GO:0005783 // GO:0043231	mitochondrion // endoplasmic reticulum lumen // cytoplasm // endoplasmic reticulum // intracellular membrane-bounded organelle	GO:0004345 // GO:0017057 // GO:0030246 // GO:0047936 // GO:0050661 // GO:0003824 // GO:0004345 // GO:0016491 // GO:0016787	glucose-6-phosphate dehydrogenase activity // 6-phosphogluconolactonase activity // carbohydrate binding // glucose 1-dehydrogenase [NAD(P)] activity // NADP binding // catalytic activity // glucose-6-phosphate dehydrogenase activity // oxidoreductase activity // hydrolase activity	HumanCyc // HumanCyc // HumanCyc // MetaCyc // MetaCyc // MetaCyc // MetaCyc // MetaCyc	NPGLUCAT-PWY // OXIDATIVEPENT-PWY // GLYCOLYSIS-E-D // RUMP-PWY // P122-PWY // OXIDATIVEPENT-PWY // GLYCOLYSIS-E-D // OXIDATIVEPENT-PWY-1	chrNA:-1--1	TC01000113.hg.1	6.5945	6.58497	6.66495	6.64896	6.53555	6.59397	6.49998	6.52167	6.68937	6.81727	6.90907	7.3083	7.11582	6.94879	6.89875	7.66082	8.06101	8.14166
3	TC01000149.hg.1	CLCN6	NM_001286	RefSeq	Homo sapiens chloride channel, voltage-sensitive 6 (CLCN6), transcript variant 1, mRNA.	FALSE	chr1	GO:0006821 // GO:0006884 // GO:0007165 // GO:0009612 // GO:0034220 // GO:0044070 // GO:0044070 // GO:0055085 // GO:0006810 // GO:0006811 // GO:0006821 // GO:0055085 // GO:0034220	chloride transport // cell volume homeostasis // signal transduction // response to mechanical stimulus // ion transmembrane transport // regulation of anion transport // regulation of anion transport // transmembrane transport // transport // ion transport // chloride transport // transmembrane transport // ion transmembrane transport	GO:0005765 // GO:0010008 // GO:0016021 // GO:0005768 // GO:0010008 // GO:0016020 // GO:0016021	lysosomal membrane // endosome membrane // integral component of membrane // endosome // endosome membrane // membrane // integral component of membrane	GO:0005247 // GO:0005524 // GO:0015297 // GO:0000166 // GO:0005216 // GO:0005247 // GO:0030554	voltage-gated chloride channel activity // ATP binding // antiporter activity // nucleotide binding // ion channel activity // voltage-gated chloride channel activity // adenyl nucleotide binding	---	---	chrNA:-1--1	TC01000149.hg.1	8.39161	8.72496	8.49353	9.51862	9.5823	9.50189	9.12108	9.43125	9.49637	9.19839	9.1987	9.57743	7.61657	7.98208	7.83605	8.6253	9.48846	9.0937
4	TC01000314.hg.1	CLIC4	NM_013943	RefSeq	Homo sapiens chloride intracellular channel 4 (CLIC4), mRNA.	FALSE	chr1	GO:0001525 // GO:0001886 // GO:0006821 // GO:0007035 // GO:0009566 // GO:0030154 // GO:0030216 // GO:0030336 // GO:0034765 // GO:0035088 // GO:0035264 // GO:0044070 // GO:0048754 // GO:0051493 // GO:0061299 // GO:0071277 // GO:1902476 // GO:1902476 // GO:0006810 // GO:0006811 // GO:0006821 // GO:0030216	angiogenesis // endothelial cell morphogenesis // chloride transport // vacuolar acidification // fertilization // cell differentiation // keratinocyte differentiation // negative regulation of cell migration // regulation of ion transmembrane transport // establishment or maintenance of apical/basal cell polarity // multicellular organism growth // regulation of anion transport // branching morp…	GO:0005622 // GO:0005737 // GO:0005739 // GO:0005813 // GO:0005829 // GO:0005886 // GO:0005902 // GO:0005911 // GO:0009986 // GO:0015629 // GO:0015630 // GO:0016363 // GO:0030496 // GO:0030659 // GO:0034707 // GO:0045177 // GO:0048471 // GO:0070062 // GO:0005634 // GO:0005737 // GO:0005739 // GO:0005815 // GO:0005856 // GO:0005886 // GO:0016020 // GO:0016021 // GO:0016363 // GO:0030054 // GO:0031…	intracellular // cytoplasm // mitochondrion // centrosome // cytosol // plasma membrane // microvillus // cell-cell junction // cell surface // actin cytoskeleton // microtubule cytoskeleton // nuclear matrix // midbody // cytoplasmic vesicle membrane // chloride channel complex // apical part of cell // perinuclear region of cytoplasm // extracellular vesicular exosome // nucleus // cytoplasm //…	GO:0005247 // GO:0005254 // GO:0005515 // GO:0005244 // GO:0005254	voltage-gated chloride channel activity // chloride channel activity // protein binding // voltage-gated ion channel activity // chloride channel activity	---	---	chrNA:-1--1	TC01000314.hg.1	10.5122	10.9891	10.7579	11.2964	10.8883	11.0829	10.9352	11.0659	10.8984	12.0303	11.4456	11.9734	9.0705	8.60024	8.5633	9.99147	9.7455	10.0923
5	TC01000346.hg.1	HMGN2	NM_005517	RefSeq	Homo sapiens high mobility group nucleosomal binding domain 2 (HMGN2), mRNA.	FALSE	chr1	---	---	GO:0000785 // GO:0005634 // GO:0005737	chromatin // nucleus // cytoplasm	GO:0031492 // GO:0044822 // GO:0003677	nucleosomal DNA binding // poly(A) RNA binding // DNA binding	---	---	chrNA:-1--1	TC01000346.hg.1	10.8331	11.4635	10.9901	10.9155	10.866	11.1095	12.6259	12.0878	12.1127	11.9486	12.119	12.4024	12.0397	11.9055	11.7769	10.5526	10.6712	10.6671
6	TC01000358.hg.1	WDTC1	NM_015023	RefSeq	Homo sapiens WD and tetratricopeptide repeats 1 (WDTC1), transcript variant 2, mRNA.	FALSE	chr1	GO:0000122 // GO:0001701 // GO:0006006 // GO:0008361 // GO:0016567 // GO:0032869 // GO:0035264 // GO:0043086 // GO:0045717 // GO:0055082	negative regulation of transcription from RNA polymerase II promoter // in utero embryonic development // glucose metabolic process // regulation of cell size // protein ubiquitination // cellular response to insulin stimulus // multicellular organism growth // negative regulation of catalytic activity // negative regulation of fatty acid biosynthetic process // cellular chemical homeostasis	GO:0005634 // GO:0005829	nucleus // cytosol	GO:0004857 // GO:0005515 // GO:0042393 // GO:0042826	enzyme inhibitor activity // protein binding // histone binding // histone deacetylase binding	---	---	chrNA:-1--1	TC01000358.hg.1	7.6454	8.5873	8.28767	7.5916	7.47438	7.74353	7.67223	7.7034	7.53275	8.56624	8.27857	8.23753	6.7345	6.60266	6.58128	7.50776	7.77936	8.13305
7	TC01000383.hg.1	---	ENST00000459072	ENSEMBL	[retired]ncrna:snoRNA chromosome:GRCh37:1:28843988:28844087:1 gene:ENSG00000238821 gene_biotype:snoRNA transcript_biotype:snoRNA	FALSE	chr1	---	---	---	---	---	---	---	---	chrNA:-1--1	TC01000383.hg.1	5.44634	5.62805	5.57846	6.63323	6.70419	7.04368	6.0811	5.98393	5.9931	6.25124	6.03897	5.79721	6.03132	6.46975	5.3228	6.49312	5.92773	6.23748
8	TC01000476.hg.1	CDCA8	NM_018101	RefSeq	Homo sapiens cell division cycle associated 8 (CDCA8), transcript variant 2, mRNA.	FALSE	chr1	GO:0000089 // GO:0000278 // GO:0007067 // GO:0051276 // GO:0007049 // GO:0051301	mitotic metaphase // mitotic cell cycle // mitotic nuclear division // chromosome organization // cell cycle // cell division	GO:0000775 // GO:0005634 // GO:0005730 // GO:0005819 // GO:0005829 // GO:0010369 // GO:0030496 // GO:0032133 // GO:0043234 // GO:0045171 // GO:0000775 // GO:0005634 // GO:0005694 // GO:0005730 // GO:0005737 // GO:0005856	chromosome, centromeric region // nucleus // nucleolus // spindle // cytosol // chromocenter // midbody // chromosome passenger complex // protein complex // intercellular bridge // chromosome, centromeric region // nucleus // chromosome // nucleolus // cytoplasm // cytoskeleton	GO:0005515	protein binding	---	---	chrNA:-1--1	TC01000476.hg.1	7.64448	7.90738	7.73849	7.48359	7.76423	7.85052	9.05538	8.64197	8.75446	7.91294	7.62019	8.31431	8.57551	8.53075	8.50981	6.26929	6.13889	6.33162
9	TC01000545.hg.1	CDC20	NM_001255	RefSeq	Homo sapiens cell division cycle 20 (CDC20), mRNA.	FALSE	chr1	GO:0000278 // GO:0007049 // GO:0007067 // GO:0007094 // GO:0008284 // GO:0016567 // GO:0031145 // GO:0031145 // GO:0031915 // GO:0040020 // GO:0050773 // GO:0051436 // GO:0051437 // GO:0051439 // GO:0051488 // GO:0090129 // GO:0007049 // GO:0007399 // GO:0030154 // GO:0031915 // GO:0051301 // GO:0090129	mitotic cell cycle // cell cycle // mitotic nuclear division // mitotic spindle assembly checkpoint // positive regulation of cell proliferation // protein ubiquitination // anaphase-promoting complex-dependent proteasomal ubiquitin-dependent protein catabolic process // anaphase-promoting complex-dependent proteasomal ubiquitin-dependent protein catabolic process // positive regulation of synapt…	GO:0000922 // GO:0005634 // GO:0005654 // GO:0005680 // GO:0005730 // GO:0005737 // GO:0005813 // GO:0005819 // GO:0005829 // GO:0048471 // GO:0005737 // GO:0005815 // GO:0005856 // GO:0043234	spindle pole // nucleus // nucleoplasm // anaphase-promoting complex // nucleolus // cytoplasm // centrosome // spindle // cytosol // perinuclear region of cytoplasm // cytoplasm // microtubule organizing center // cytoskeleton // protein complex	GO:0005515 // GO:0008022 // GO:0019899	protein binding // protein C-terminus binding // enzyme binding	GenMAPP	Cell_cycle_KEGG	chrNA:-1--1	TC01000545.hg.1	6.34788	6.97029	6.68148	6.48534	6.4565	6.70018	7.79479	6.93075	6.771	6.0071	5.75294	6.19157	7.29298	7.21078	7.08151	6.30405	5.83967	5.85874
10	TC01000563.hg.1	KIF2C	NM_006845	RefSeq	Homo sapiens kinesin family member 2C (KIF2C), mRNA.	FALSE	chr1	GO:0000278 // GO:0007018 // GO:0007019 // GO:0007019 // GO:0007059 // GO:0007067 // GO:0007596 // GO:0008152 // GO:0008152 // GO:0008283 // GO:0019886 // GO:0030951 // GO:0051983 // GO:0007018 // GO:0007049 // GO:0007067 // GO:0051301	mitotic cell cycle // microtubule-based movement // microtubule depolymerization // microtubule depolymerization // chromosome segregation // mitotic nuclear division // blood coagulation // metabolic process // metabolic process // cell proliferation // antigen processing and presentation of exogenous peptide antigen via MHC class II // establishment or maintenance of microtubule cytoskeleton po…	GO:0000775 // GO:0000776 // GO:0000777 // GO:0005634 // GO:0005829 // GO:0005871 // GO:0005881 // GO:0015630 // GO:0035371 // GO:0000775 // GO:0000776 // GO:0005694 // GO:0005737 // GO:0005856 // GO:0005871 // GO:0005874 // GO:0016020	chromosome, centromeric region // kinetochore // condensed chromosome kinetochore // nucleus // cytosol // kinesin complex // cytoplasmic microtubule // microtubule cytoskeleton // microtubule plus-end // chromosome, centromeric region // kinetochore // chromosome // cytoplasm // cytoskeleton // kinesin complex // microtubule // membrane	GO:0003777 // GO:0005515 // GO:0005524 // GO:0019237 // GO:0051010 // GO:0000166 // GO:0003777 // GO:0008017	microtubule motor activity // protein binding // ATP binding // centromeric DNA binding // microtubule plus-end binding // nucleotide binding // microtubule motor activity // microtubule binding	---	---	chrNA:-1--1	TC01000563.hg.1	7.26544	7.67285	7.31847	7.08716	7.01595	7.11918	7.84789	7.58603	7.9851	7.31512	6.98968	7.40939	7.59461	7.54852	7.41582	6.09119	5.88733	6.11184
11	TC01000575.hg.1	NASP	NM_001195193	RefSeq	Homo sapiens nuclear autoantigenic sperm protein (histone-binding) (NASP), transcript variant 4, mRNA.	FALSE	chr1	GO:0001824 // GO:0006260 // GO:0006335 // GO:0006336 // GO:0007049 // GO:0008283 // GO:0015031 // GO:0043486 // GO:0006260 // GO:0006810 // GO:0007049	blastocyst development // DNA replication // DNA replication-dependent nucleosome assembly // DNA replication-independent nucleosome assembly // cell cycle // cell proliferation // protein transport // histone exchange // DNA replication // transport // cell cycle	GO:0000790 // GO:0005634 // GO:0005634 // GO:0005730 // GO:0005737 // GO:0043234 // GO:0005634	nuclear chromatin // nucleus // nucleus // nucleolus // cytoplasm // protein complex // nucleus	GO:0042393 // GO:0051879	histone binding // Hsp90 protein binding	---	---	chrNA:-1--1	TC01000575.hg.1	10.4217	10.8942	10.5591	10.1147	10.1053	9.94135	9.51699	9.79153	9.55317	9.59425	10.1367	10.326	9.37285	9.36844	9.478	7.39931	8.0958	8.04889
12	TC01000580.hg.1	TSPAN1	NM_005727	RefSeq	Homo sapiens tetraspanin 1 (TSPAN1), mRNA.	FALSE	chr1	GO:0008283 // GO:0016477 // GO:0045807 // GO:0050821 // GO:0071934	cell proliferation // cell migration // positive regulation of endocytosis // protein stabilization // thiamine transmembrane transport	GO:0005765 // GO:0016021 // GO:0070062 // GO:0005737 // GO:0005764 // GO:0005886 // GO:0016020 // GO:0016020 // GO:0031982 // GO:0048471	lysosomal membrane // integral component of membrane // extracellular vesicular exosome // cytoplasm // lysosome // plasma membrane // membrane // membrane // vesicle // perinuclear region of cytoplasm	GO:0005515 // GO:0015403	protein binding // thiamine uptake transmembrane transporter activity	---	---	chrNA:-1--1	TC01000580.hg.1	12.9017	13.4867	12.8958	10.8479	10.1768	9.91739	6.21666	6.2253	6.47068	5.92344	6.27916	6.36977	10.5612	10.8148	11.0636	9.52341	10.0698	9.874
13	TC01000582.hg.1	RAD54L	NM_001142548	RefSeq	Homo sapiens RAD54-like (S. cerevisiae) (RAD54L), transcript variant 2, mRNA.	FALSE	chr1	GO:0000724 // GO:0000733 // GO:0006281 // GO:0006310 // GO:0007126 // GO:0010212 // GO:0042493 // GO:0051276 // GO:0006281 // GO:0006302 // GO:0006974 // GO:0008152	double-strand break repair via homologous recombination // DNA strand renaturation // DNA repair // DNA recombination // meiotic nuclear division // response to ionizing radiation // response to drug // chromosome organization // DNA repair // double-strand break repair // cellular response to DNA damage stimulus // metabolic process	GO:0005634 // GO:0005730 // GO:0005634 // GO:0005634	nucleus // nucleolus // nucleus // nucleus	GO:0003677 // GO:0004386 // GO:0005515 // GO:0005524 // GO:0036310 // GO:0000166 // GO:0003676 // GO:0016787 // GO:0016817	DNA binding // helicase activity // protein binding // ATP binding // annealing helicase activity // nucleotide binding // nucleic acid binding // hydrolase activity // hydrolase activity, acting on acid anhydrides	---	---	chrNA:-1--1	TC01000582.hg.1	7.35411	7.69148	7.63659	7.8866	7.97737	7.58692	7.50424	7.54146	7.73871	7.61515	7.86547	7.96607	7.6318	7.74486	7.72307	6.22157	5.77599	5.79835
14	TC01000707.hg.1	USP1	NM_001017415	RefSeq	Homo sapiens ubiquitin specific peptidase 1 (USP1), transcript variant 2, mRNA.	FALSE	chr1	GO:0006281 // GO:0006282 // GO:0006511 // GO:0009411 // GO:0016579 // GO:0035520 // GO:0006281 // GO:0006508 // GO:0006974	DNA repair // regulation of DNA repair // ubiquitin-dependent protein catabolic process // response to UV // protein deubiquitination // monoubiquitinated protein deubiquitination // DNA repair // proteolysis // cellular response to DNA damage stimulus	GO:0005634 // GO:0005654 // GO:0005634	nucleus // nucleoplasm // nucleus	GO:0004197 // GO:0004221 // GO:0004843 // GO:0004843 // GO:0005515 // GO:0004843 // GO:0008233 // GO:0008234 // GO:0016787 // GO:0036459	cysteine-type endopeptidase activity // ubiquitin thiolesterase activity // ubiquitin-specific protease activity // ubiquitin-specific protease activity // protein binding // ubiquitin-specific protease activity // peptidase activity // cysteine-type peptidase activity // hydrolase activity // ubiquitinyl hydrolase activity	---	---	chrNA:-1--1	TC01000707.hg.1	6.68343	7.03023	7.00038	7.02346	6.88293	7.35708	8.19702	8.04984	8.18852	8.53731	8.7638	8.86547	8.22311	8.14795	7.90051	6.23169	6.28066	6.6914
15	TC01000721.hg.1	DLEU2L	NR_002771	RefSeq	Homo sapiens deleted in lymphocytic leukemia 2-like (DLEU2L), non-coding RNA.	FALSE	chr1	---	---	---	---	---	---	---	---	chrNA:-1--1	TC01000721.hg.1	6.3623	6.74918	6.64217	6.43056	6.6739	6.24338	6.94493	7.03489	7.43002	6.0507	6.73274	6.91742	6.94465	6.83408	7.20649	6.19031	6.16451	5.46357
16	TC01000730.hg.1	LEPR	NM_001003679	RefSeq	Homo sapiens leptin receptor (LEPR), transcript variant 3, mRNA.	FALSE	chr1	GO:0006112 // GO:0007166 // GO:0007275 // GO:0008203 // GO:0019221 // GO:0051346	energy reserve metabolic process // cell surface receptor signaling pathway // multicellular organismal development // cholesterol metabolic process // cytokine-mediated signaling pathway // negative regulation of hydrolase activity	GO:0005576 // GO:0005886 // GO:0016021 // GO:0043235 // GO:0005886 // GO:0016020	extracellular region // plasma membrane // integral component of membrane // receptor complex // plasma membrane // membrane	GO:0004888 // GO:0004896 // GO:0005515 // GO:0042802	transmembrane signaling receptor activity // cytokine receptor activity // protein binding // identical protein binding	---	---	chrNA:-1--1	TC01000730.hg.1	7.14712	7.1502	7.17614	7.85529	7.92211	7.92143	6.51264	6.74092	6.73296	7.07641	7.29857	7.6545	6.81601	6.75875	6.89062	7.60071	7.68828	7.97841
17	TC01000748.hg.1	RP4-694A7.2	OTTHUMT00000025505	Havana transcript	cdna:all chromosome:VEGA56:1:68479129:68483539:1 Gene:OTTHUMG00000009204	FALSE	chr1	---	---	---	---	---	---	---	---	chrNA:-1--1	TC01000748.hg.1	9.37608	9.76938	9.2039	11.9395	11.6818	11.1521	4.18928	4.36293	4.04979	3.80943	3.89133	3.92223	6.98245	7.11236	7.28438	6.71735	8.94767	8.81234
18	TC01000846.hg.1	CDC7	NM_001134419	RefSeq	Homo sapiens cell division cycle 7 (CDC7), transcript variant 2, mRNA.	FALSE	chr1	GO:0000082 // GO:0000278 // GO:0006260 // GO:0006468 // GO:0008284 // GO:0010571 // GO:0010971 // GO:0044770 // GO:0051301 // GO:0007049 // GO:0016310	G1/S transition of mitotic cell cycle // mitotic cell cycle // DNA replication // protein phosphorylation // positive regulation of cell proliferation // positive regulation of nuclear cell cycle DNA replication // positive regulation of G2/M transition of mitotic cell cycle // cell cycle phase transition // cell division // cell cycle // phosphorylation	GO:0005634 // GO:0005654 // GO:0005730 // GO:0005737 // GO:0015630 // GO:0045171 // GO:0005634	nucleus // nucleoplasm // nucleolus // cytoplasm // microtubule cytoskeleton // intercellular bridge // nucleus	GO:0004672 // GO:0004674 // GO:0005515 // GO:0005524 // GO:0016301 // GO:0046872 // GO:0000166 // GO:0004672 // GO:0016301 // GO:0016740 // GO:0016772	protein kinase activity // protein serine/threonine kinase activity // protein binding // ATP binding // kinase activity // metal ion binding // nucleotide binding // protein kinase activity // kinase activity // transferase activity // transferase activity, transferring phosphorus-containing groups	GenMAPP // GenMAPP	Cell_cycle_KEGG // DNA_replication_Reactome	chrNA:-1--1	TC01000846.hg.1	7.43292	7.98515	7.68298	8.01726	7.81239	8.11873	7.71764	7.61903	7.74788	7.15047	7.91174	8.11855	7.11094	6.93826	7.04503	5.69488	5.5564	5.37275
19	TC01000926.hg.1	NTNG1	NM_001113226	RefSeq	Homo sapiens netrin G1 (NTNG1), transcript variant 1, mRNA.	FALSE	chr1	GO:0007409 // GO:0007275 // GO:0007399 // GO:0007409 // GO:0030154	axonogenesis // multicellular organismal development // nervous system development // axonogenesis // cell differentiation	GO:0046658 // GO:0005886 // GO:0016020 // GO:0031225 // GO:0046658	anchored component of plasma membrane // plasma membrane // membrane // anchored component of membrane // anchored component of plasma membrane	GO:0005515	protein binding	---	---	chrNA:-1--1	TC01000926.hg.1	5.32261	5.15732	5.23644	6.30032	6.43664	6.37217	4.63007	4.77962	4.63416	4.56749	4.55911	4.64197	4.66253	4.67726	4.78496	4.83028	4.60894	4.70869
20	TC01000936.hg.1	GPSM2	NM_013296	RefSeq	Homo sapiens G-protein signaling modulator 2 (GPSM2), mRNA.	FALSE	chr1	GO:0000132 // GO:0007186 // GO:0050790 // GO:0060487	establishment of mitotic spindle orientation // G-protein coupled receptor signaling pathway // regulation of catalytic activity // lung epithelial cell differentiation	GO:0005634 // GO:0005730 // GO:0005737 // GO:0005938 // GO:0045177 // GO:0005737	nucleus // nucleolus // cytoplasm // cell cortex // apical part of cell // cytoplasm	GO:0005515 // GO:0030695 // GO:0042802	protein binding // GTPase regulator activity // identical protein binding	---	---	chrNA:-1--1	TC01000936.hg.1	7.83016	8.17092	8.09642	7.58313	7.47236	8.07913	8.41999	8.07479	7.88796	7.7537	7.82642	7.86418	8.7334	8.55644	8.79717	6.71697	7.5344	7.551
21	TC01001002.hg.1	DCLRE1B	NM_022836	RefSeq	Homo sapiens DNA cross-link repair 1B (DCLRE1B), mRNA.	FALSE	chr1	GO:0000075 // GO:0000723 // GO:0006281 // GO:0031627 // GO:0031848 // GO:0031860 // GO:0090305 // GO:0090305 // GO:0006974 // GO:0031627 // GO:0031848 // GO:0031860	cell cycle checkpoint // telomere maintenance // DNA repair // telomeric loop formation // protection from non-homologous end joining at telomere // telomeric 3' overhang formation // nucleic acid phosphodiester bond hydrolysis // nucleic acid phosphodiester bond hydrolysis // cellular response to DNA damage stimulus // telomeric loop formation // protection from non-homologous end joining at tel…	GO:0000781 // GO:0005634 // GO:0005737 // GO:0005813 // GO:0000781 // GO:0005694 // GO:0005815 // GO:0005856	chromosome, telomeric region // nucleus // cytoplasm // centrosome // chromosome, telomeric region // chromosome // microtubule organizing center // cytoskeleton	GO:0005515 // GO:0008409 // GO:0004518 // GO:0004527 // GO:0008409 // GO:0016787	protein binding // 5'-3' exonuclease activity // nuclease activity // exonuclease activity // 5'-3' exonuclease activity // hydrolase activity	---	---	chrNA:-1--1	TC01001002.hg.1	6.35134	6.67649	6.33064	6.7246	6.6658	6.76936	7.41725	6.75684	6.73818	7.2048	6.93599	7.05699	7.03103	6.95578	6.83676	6.15336	5.81858	6.08714
22	TC01001014.hg.1	SLC22A15	NM_018420	RefSeq	Homo sapiens solute carrier family 22, member 15 (SLC22A15), mRNA.	FALSE	chr1	GO:0006811 // GO:0055085 // GO:0006810	ion transport // transmembrane transport // transport	GO:0016021 // GO:0016020	integral component of membrane // membrane	GO:0022857	transmembrane transporter activity	---	---	chrNA:-1--1	TC01001014.hg.1	8.15095	8.13698	8.28889	8.9106	8.95379	8.98917	7.20493	7.50665	7.72169	8.63294	9.15792	9.33957	7.67084	7.98286	8.08142	8.59629	9.58249	9.47361
23	TC01001026.hg.1	TTF2	NM_003594	RefSeq	Homo sapiens transcription termination factor, RNA polymerase II (TTF2), mRNA.	FALSE	chr1	GO:0006200 // GO:0006200 // GO:0006353 // GO:0006355 // GO:0006369 // GO:0006397 // GO:0008380 // GO:0006351 // GO:0006353 // GO:0008152	ATP catabolic process // ATP catabolic process // DNA-templated transcription, termination // regulation of transcription, DNA-templated // termination of RNA polymerase II transcription // mRNA processing // RNA splicing // transcription, DNA-templated // DNA-templated transcription, termination // metabolic process	GO:0005681 // GO:0005737 // GO:0008023 // GO:0005634	spliceosomal complex // cytoplasm // transcription elongation factor complex // nucleus	GO:0003677 // GO:0005515 // GO:0005524 // GO:0008026 // GO:0008094 // GO:0008270 // GO:0000166 // GO:0003676 // GO:0004386 // GO:0016787	DNA binding // protein binding // ATP binding // ATP-dependent helicase activity // DNA-dependent ATPase activity // zinc ion binding // nucleotide binding // nucleic acid binding // helicase activity // hydrolase activity	---	---	chrNA:-1--1	TC01001026.hg.1	7.0755	7.46919	7.19083	7.73197	7.62736	7.79194	8.3918	8.21957	8.32031	7.81248	7.9026	8.27545	8.63454	8.54998	8.82888	7.16399	7.50979	7.48641
24	TC01001045.hg.1	FAM72B	NM_001100910	RefSeq	Homo sapiens family with sequence similarity 72, member B (FAM72B), mRNA.	FALSE	chr1	---	---	---	---	---	---	---	---	chrNA:-1--1	TC01001045.hg.1	8.08532	8.35054	8.16378	8.65902	8.47323	8.55809	7.83177	7.87856	7.70325	7.38157	7.78434	7.79731	8.66967	8.60631	8.61439	7.26459	7.14869	7.06207
25	TC01001083.hg.1	---	BC065231	GenBank	Homo sapiens cDNA clone IMAGE:5548407, partial cds.	FALSE	chr1	---	---	---	---	---	---	---	---	chrNA:-1--1	TC01001083.hg.1	8.11721	8.51813	8.30357	8.98105	9.04894	8.84972	8.67628	8.68588	8.59864	10.0007	9.72791	10.1852	7.99338	8.10786	7.48962	8.70189	8.39451	8.2254
26	TC01001090.hg.1	TXNIP	NM_006472	RefSeq	Homo sapiens thioredoxin interacting protein (TXNIP), mRNA.	FALSE	chr1	GO:0000122 // GO:0006351 // GO:0006606 // GO:0007049 // GO:0009612 // GO:0009749 // GO:0030216 // GO:0032355 // GO:0032570 // GO:0035872 // GO:0042127 // GO:0042493 // GO:0042542 // GO:0043065 // GO:0043086 // GO:0045087 // GO:0048008 // GO:0051592 // GO:0051782 // GO:0071228 // GO:0006355 // GO:0006979	negative regulation of transcription from RNA polymerase II promoter // transcription, DNA-templated // protein import into nucleus // cell cycle // response to mechanical stimulus // response to glucose // keratinocyte differentiation // response to estradiol // response to progesterone // nucleotide-binding domain, leucine rich repeat containing receptor signaling pathway // regulation of cell …	GO:0005634 // GO:0005737 // GO:0005758 // GO:0005829 // GO:0005737	nucleus // cytoplasm // mitochondrial intermembrane space // cytosol // cytoplasm	GO:0004857 // GO:0005515 // GO:0031625	enzyme inhibitor activity // protein binding // ubiquitin protein ligase binding	---	---	chrNA:-1--1	TC01001090.hg.1	10.0289	10.8708	10.5028	9.71872	9.3307	9.6072	6.83018	6.91059	7.35293	9.14671	9.50409	9.84189	6.73778	6.70965	6.6591	8.5234	9.32535	9.86634
27	TC01001173.hg.1	HIST2H4B	NM_001034077	RefSeq	Homo sapiens histone cluster 2, H4b (HIST2H4B), mRNA.	FALSE	chr1	GO:0000278 // GO:0000723 // GO:0006325 // GO:0006325 // GO:0006334 // GO:0006335 // GO:0006336 // GO:0034080 // GO:0035574 // GO:0045653 // GO:0048015 // GO:0006334	mitotic cell cycle // telomere maintenance // chromatin organization // chromatin organization // nucleosome assembly // DNA replication-dependent nucleosome assembly // DNA replication-independent nucleosome assembly // centromere-specific nucleosome assembly // histone H4-K20 demethylation // negative regulation of megakaryocyte differentiation // phosphatidylinositol-mediated signaling // nucl…	GO:0000228 // GO:0000786 // GO:0005576 // GO:0005634 // GO:0005654 // GO:0043234 // GO:0070062 // GO:0000786 // GO:0005634 // GO:0005694 // GO:0016020	nuclear chromosome // nucleosome // extracellular region // nucleus // nucleoplasm // protein complex // extracellular vesicular exosome // nucleosome // nucleus // chromosome // membrane	GO:0003677 // GO:0005515 // GO:0035575 // GO:0044822 // GO:0046982 // GO:0003677	DNA binding // protein binding // histone demethylase activity (H4-K20 specific) // poly(A) RNA binding // protein heterodimerization activity // DNA binding	---	---	chrNA:-1--1	TC01001173.hg.1	6.6539	6.94738	6.75955	7.3764	7.18095	7.62292	6.30159	6.55455	6.53672	8.39641	8.74451	8.85058	5.99585	5.67372	5.69718	5.08071	5.28238	5.08754
28	TC01001364.hg.1	PEA15	NM_003768	RefSeq	Homo sapiens phosphoprotein enriched in astrocytes 15 (PEA15), transcript variant 2, mRNA.	FALSE	chr1	GO:0006810 // GO:0006915 // GO:0008643 // GO:0043278 // GO:0046325 // GO:1902042 // GO:1902043 // GO:0006810 // GO:0042981 // GO:1902042	transport // apoptotic process // carbohydrate transport // response to morphine // negative regulation of glucose import // negative regulation of extrinsic apoptotic signaling pathway via death domain receptors // positive regulation of extrinsic apoptotic signaling pathway via death domain receptors // transport // regulation of apoptotic process // negative regulation of extrinsic apoptotic s…	GO:0005737 // GO:0005875	cytoplasm // microtubule associated complex	GO:0005515	protein binding	GenMAPP	Calcium_regulation_in_cardiac_cells	chrNA:-1--1	TC01001364.hg.1	9.00262	9.26748	9.38496	10.5654	10.5353	11.0161	13.6356	12.9152	12.5868	13.8026	12.7121	13.1829	10.1791	9.98464	9.59046	10.5663	9.86114	10.2756
29	TC01001422.hg.1	UAP1	NM_003115	RefSeq	Homo sapiens UDP-N-acteylglucosamine pyrophosphorylase 1 (UAP1), mRNA.	FALSE	chr1	GO:0006048 // GO:0006048 // GO:0006488 // GO:0018279 // GO:0043687 // GO:0044267 // GO:0006047 // GO:0008152	UDP-N-acetylglucosamine biosynthetic process // UDP-N-acetylglucosamine biosynthetic process // dolichol-linked oligosaccharide biosynthetic process // protein N-linked glycosylation via asparagine // post-translational protein modification // cellular protein metabolic process // UDP-N-acetylglucosamine metabolic process // metabolic process	GO:0005829 // GO:0005737 // GO:0005829	cytosol // cytoplasm // cytosol	GO:0003977 // GO:0030246 // GO:0003977 // GO:0016740 // GO:0016779	UDP-N-acetylglucosamine diphosphorylase activity // carbohydrate binding // UDP-N-acetylglucosamine diphosphorylase activity // transferase activity // nucleotidyltransferase activity	HumanCyc // HumanCyc	UDPNACETYLGALSYN-PWY // PWY-5514	chrNA:-1--1	TC01001422.hg.1	9.09459	9.3802	9.06745	10.7613	10.8325	11.3185	9.08008	8.66439	8.34458	8.6342	8.86074	8.81148	7.60078	7.15593	7.65501	7.36716	7.80787	8.20495
30	TC01001426.hg.1	HSD17B7	NM_016371	RefSeq	Homo sapiens hydroxysteroid (17-beta) dehydrogenase 7 (HSD17B7), mRNA.	FALSE	chr1	GO:0006695 // GO:0006703 // GO:0044281 // GO:0055114 // GO:0006629 // GO:0006694 // GO:0006695 // GO:0008152	cholesterol biosynthetic process // estrogen biosynthetic process // small molecule metabolic process // oxidation-reduction process // lipid metabolic process // steroid biosynthetic process // cholesterol biosynthetic process // metabolic process	GO:0005789 // GO:0005886 // GO:0016021 // GO:0005783 // GO:0016020	endoplasmic reticulum membrane // plasma membrane // integral component of membrane // endoplasmic reticulum // membrane	GO:0000253 // GO:0004303 // GO:0005148 // GO:0004303 // GO:0016491	3-keto sterol reductase activity // estradiol 17-beta-dehydrogenase activity // prolactin receptor binding // estradiol 17-beta-dehydrogenase activity // oxidoreductase activity	GenMAPP // HumanCyc // HumanCyc // HumanCyc // MetaCyc // MetaCyc // MetaCyc // MetaCyc // MetaCyc	Steroid_Biosynthesis // PWY66-341 // PWY66-3 // PWY66-4 // PWY66-380 // PWY66-3 // PWY66-4 // PWY-6074 // PWY66-341	chrNA:-1--1	TC01001426.hg.1	8.09812	8.21256	8.02078	9.48696	9.2777	9.14749	9.06926	9.673	9.73376	8.70484	8.73337	9.08638	7.27271	7.31217	7.17939	8.96598	9.55907	9.48123
31	TC01001430.hg.1	NUF2	NM_031423	RefSeq	Homo sapiens NUF2, NDC80 kinetochore complex component (NUF2), transcript variant 2, mRNA.	FALSE	chr1	GO:0000278 // GO:0007059 // GO:0007067 // GO:0007049 // GO:0051301	mitotic cell cycle // chromosome segregation // mitotic nuclear division // cell cycle // cell division	GO:0000775 // GO:0000777 // GO:0005634 // GO:0005829 // GO:0031262 // GO:0000775 // GO:0000776 // GO:0005694 // GO:0016020	chromosome, centromeric region // condensed chromosome kinetochore // nucleus // cytosol // Ndc80 complex // chromosome, centromeric region // kinetochore // chromosome // membrane	GO:0005515 // GO:0003674	protein binding // molecular_function	---	---	chrNA:-1--1	TC01001430.hg.1	9.23434	9.20908	8.7773	8.63157	8.81649	8.8051	9.81087	9.5241	9.25199	8.57323	8.43502	8.92351	9.3232	9.47617	9.28874	6.96002	7.18012	7.10862
32	TC01001435.hg.1	PBX1	NM_001204961	RefSeq	Homo sapiens pre-B-cell leukemia homeobox 1 (PBX1), transcript variant 2, mRNA.	FALSE	chr1	GO:0001658 // GO:0006351 // GO:0006694 // GO:0007548 // GO:0008284 // GO:0009887 // GO:0009952 // GO:0009954 // GO:0010971 // GO:0030278 // GO:0030325 // GO:0030326 // GO:0035162 // GO:0043433 // GO:0045665 // GO:0045944 // GO:0048536 // GO:0048538 // GO:0048706 // GO:0001655 // GO:0006355 // GO:0007275 // GO:0030154 // GO:0042127 // GO:0048568	branching involved in ureteric bud morphogenesis // transcription, DNA-templated // steroid biosynthetic process // sex differentiation // positive regulation of cell proliferation // organ morphogenesis // anterior/posterior pattern specification // proximal/distal pattern formation // positive regulation of G2/M transition of mitotic cell cycle // regulation of ossification // adrenal gland dev…	GO:0005634 // GO:0005667 // GO:0005730 // GO:0005737 // GO:0005634 // GO:0005737	nucleus // transcription factor complex // nucleolus // cytoplasm // nucleus // cytoplasm	GO:0001077 // GO:0003677 // GO:0003700 // GO:0005515 // GO:0008134 // GO:0043565 // GO:0046982 // GO:0003677 // GO:0003700	RNA polymerase II core promoter proximal region sequence-specific DNA binding transcription factor activity involved in positive regulation of transcription // DNA binding // sequence-specific DNA binding transcription factor activity // protein binding // transcription factor binding // sequence-specific DNA binding // protein heterodimerization activity // DNA binding // sequence-specific DNA b…	---	---	chrNA:-1--1	TC01001435.hg.1	6.76245	6.76645	6.78191	5.76839	5.54789	5.45266	5.8787	6.1345	6.14472	6.64679	6.7651	6.9312	6.42821	6.55152	6.53227	6.66439	6.68064	6.66509
33	TC01001476.hg.1	C1orf112	NM_018186	RefSeq	Homo sapiens chromosome 1 open reading frame 112 (C1orf112), mRNA.	FALSE	chr1	---	---	---	---	---	---	---	---	chrNA:-1--1	TC01001476.hg.1	8.54595	8.57756	8.25749	8.26083	8.15045	8.09056	7.30976	7.34305	7.2933	6.89615	7.24404	7.53436	8.19971	8.33774	8.61089	6.36266	6.4021	6.48793
34	TC01001568.hg.1	MR1	NM_001194999	RefSeq	Homo sapiens major histocompatibility complex, class I-related (MR1), transcript variant 2, mRNA.	FALSE	chr1	GO:0001916 // GO:0002367 // GO:0002474 // GO:0006955 // GO:0007165 // GO:0019882 // GO:0032611 // GO:0032620 // GO:0045087 // GO:0050829 // GO:0002376 // GO:0006955 // GO:0019882	positive regulation of T cell mediated cytotoxicity // cytokine production involved in immune response // antigen processing and presentation of peptide antigen via MHC class I // immune response // signal transduction // antigen processing and presentation // interleukin-1 beta production // interleukin-17 production // innate immune response // defense response to Gram-negative bacterium // imm…	GO:0005576 // GO:0005783 // GO:0005789 // GO:0005886 // GO:0016021 // GO:0042612 // GO:0005783 // GO:0005886 // GO:0016020	extracellular region // endoplasmic reticulum // endoplasmic reticulum membrane // plasma membrane // integral component of membrane // MHC class I protein complex // endoplasmic reticulum // plasma membrane // membrane	GO:0003823 // GO:0032393 // GO:0042605	antigen binding // MHC class I receptor activity // peptide antigen binding	---	---	chrNA:-1--1	TC01001568.hg.1	6.59987	7.03374	6.64398	6.54695	6.24975	6.35368	6.74374	7.74693	7.88539	8.12495	8.06175	8.46069	7.46144	7.35166	7.78819	8.50427	8.64321	8.85502
35	TC01001602.hg.1	HMCN1	NM_031935	RefSeq	Homo sapiens hemicentin 1 (HMCN1), mRNA.	FALSE	chr1	GO:0007601 // GO:0050896 // GO:0007165 // GO:0007596	visual perception // response to stimulus // signal transduction // blood coagulation	GO:0005604 // GO:0005938 // GO:0030054 // GO:0031012 // GO:0070062 // GO:0005576 // GO:0005578 // GO:0016020	basement membrane // cell cortex // cell junction // extracellular matrix // extracellular vesicular exosome // extracellular region // proteinaceous extracellular matrix // membrane	GO:0005509 // GO:0004888	calcium ion binding // transmembrane signaling receptor activity	---	---	chrNA:-1--1	TC01001602.hg.1	7.18677	7.7033	7.35344	5.74769	5.37315	5.21692	4.89018	4.96145	4.93117	4.59194	4.65288	4.64856	4.66429	4.87658	4.73935	4.94393	4.48604	4.65246
36	TC01001664.hg.1	IPO9	NM_018085	RefSeq	Homo sapiens importin 9 (IPO9), mRNA.	FALSE	chr1	GO:0006606 // GO:0006606 // GO:0006810 // GO:0006886 // GO:0015031	protein import into nucleus // protein import into nucleus // transport // intracellular protein transport // protein transport	GO:0005634 // GO:0005737 // GO:0005737 // GO:0016020	nucleus // cytoplasm // cytoplasm // membrane	GO:0005515 // GO:0008536 // GO:0008565 // GO:0042393 // GO:0042393	protein binding // Ran GTPase binding // protein transporter activity // histone binding // histone binding	---	---	chrNA:-1--1	TC01001664.hg.1	12.4156	12.9228	12.7865	12.6195	12.5049	12.7443	12.9667	12.8009	12.9714	13.1897	12.6477	13.2243	12.5412	12.3984	12.5114	11.0207	11.4164	11.6123
37	TC01001717.hg.1	FAM72A	NM_001123168	RefSeq	Homo sapiens family with sequence similarity 72, member A (FAM72A), mRNA.	FALSE	chr1	---	---	GO:0005739 // GO:0005737	mitochondrion // cytoplasm	---	---	---	---	chrNA:-1--1	TC01001717.hg.1	8.13672	8.25273	8.14146	8.6111	8.52982	8.60613	7.90754	8.0121	7.87922	7.58753	7.83032	7.90623	8.74691	8.54145	8.66346	7.30309	7.16877	7.05279
38	TC01001759.hg.1	LINC00467	NR_026761	RefSeq	Homo sapiens long intergenic non-protein coding RNA 467 (LINC00467), long non-coding RNA.	FALSE	chr1	---	---	---	---	---	---	---	---	chrNA:-1--1	TC01001759.hg.1	6.45388	6.35858	6.55636	7.11389	7.12229	7.50002	6.73673	6.47444	6.50341	7.18759	7.54287	7.45764	7.13551	6.94795	7.171	7.87418	8.63494	8.35987
39	TC01001767.hg.1	DTL	NM_016448	RefSeq	Homo sapiens denticleless E3 ubiquitin protein ligase homolog (Drosophila) (DTL), transcript variant 1, mRNA.	FALSE	chr1	GO:0000209 // GO:0000209 // GO:0006260 // GO:0006511 // GO:0006511 // GO:0006513 // GO:0006974 // GO:0009411 // GO:0019985 // GO:0031572 // GO:0051726 // GO:0006974 // GO:0016567	protein polyubiquitination // protein polyubiquitination // DNA replication // ubiquitin-dependent protein catabolic process // ubiquitin-dependent protein catabolic process // protein monoubiquitination // cellular response to DNA damage stimulus // response to UV // translesion synthesis // G2 DNA damage checkpoint // regulation of cell cycle // cellular response to DNA damage stimulus // prote…	GO:0005634 // GO:0005694 // GO:0005730 // GO:0005737 // GO:0005813 // GO:0031464 // GO:0031465 // GO:0031965 // GO:0043231 // GO:0005634 // GO:0005737 // GO:0005815 // GO:0005856 // GO:0016020	nucleus // chromosome // nucleolus // cytoplasm // centrosome // Cul4A-RING E3 ubiquitin ligase complex // Cul4B-RING E3 ubiquitin ligase complex // nuclear membrane // intracellular membrane-bounded organelle // nucleus // cytoplasm // microtubule organizing center // cytoskeleton // membrane	GO:0004842 // GO:0005515	ubiquitin-protein transferase activity // protein binding	---	---	chrNA:-1--1	TC01001767.hg.1	11.151	11.261	10.96	11.5943	11.4499	11.6134	11.7913	11.7802	11.6687	12.5895	12.5586	12.8379	11.5002	11.2611	11.611	5.87918	6.0231	6.05032
40	TC01001791.hg.1	CENPF	NM_016343	RefSeq	Homo sapiens centromere protein F, 350/400kDa (CENPF), mRNA.	FALSE	chr1	GO:0000085 // GO:0000086 // GO:0000087 // GO:0000087 // GO:0000278 // GO:0000278 // GO:0006260 // GO:0007059 // GO:0007059 // GO:0007067 // GO:0007094 // GO:0007517 // GO:0008283 // GO:0010389 // GO:0015031 // GO:0015031 // GO:0016202 // GO:0030154 // GO:0042493 // GO:0045892 // GO:0051310 // GO:0051382 // GO:0051726 // GO:0007049 // GO:0007275 // GO:0016202 // GO:0051301	mitotic G2 phase // G2/M transition of mitotic cell cycle // mitotic M phase // mitotic M phase // mitotic cell cycle // mitotic cell cycle // DNA replication // chromosome segregation // chromosome segregation // mitotic nuclear division // mitotic spindle assembly checkpoint // muscle organ development // cell proliferation // regulation of G2/M transition of mitotic cell cycle // protein trans…	GO:0000775 // GO:0000776 // GO:0000785 // GO:0000922 // GO:0000940 // GO:0000940 // GO:0005634 // GO:0005635 // GO:0005730 // GO:0005737 // GO:0005819 // GO:0005829 // GO:0016363 // GO:0030496 // GO:0045120 // GO:0048471 // GO:0000775 // GO:0000776 // GO:0000777 // GO:0005634 // GO:0005694 // GO:0005737 // GO:0005819 // GO:0005856 // GO:0016363	chromosome, centromeric region // kinetochore // chromatin // spindle pole // condensed chromosome outer kinetochore // condensed chromosome outer kinetochore // nucleus // nuclear envelope // nucleolus // cytoplasm // spindle // cytosol // nuclear matrix // midbody // pronucleus // perinuclear region of cytoplasm // chromosome, centromeric region // kinetochore // condensed chromosome kinetochor…	GO:0003682 // GO:0005515 // GO:0008022 // GO:0008134 // GO:0042803 // GO:0045502 // GO:0008134 // GO:0042803 // GO:0045502	chromatin binding // protein binding // protein C-terminus binding // transcription factor binding // protein homodimerization activity // dynein binding // transcription factor binding // protein homodimerization activity // dynein binding	---	---	chrNA:-1--1	TC01001791.hg.1	9.51076	10.3727	10.0984	9.41257	8.92284	9.77972	10.4854	10.0024	9.96907	9.21135	10.2132	10.6128	9.71887	9.57858	10.0195	7.02668	7.60182	7.78033
41	TC01001805.hg.1	TGFB2	NM_001135599	RefSeq	Homo sapiens transforming growth factor, beta 2 (TGFB2), transcript variant 1, mRNA.	FALSE	chr1	GO:0000902 // GO:0001502 // GO:0001525 // GO:0001654 // GO:0001666 // GO:0001837 // GO:0001837 // GO:0001942 // GO:0001942 // GO:0001974 // GO:0002576 // GO:0003007 // GO:0006468 // GO:0007050 // GO:0007179 // GO:0007184 // GO:0007267 // GO:0007411 // GO:0007435 // GO:0007507 // GO:0007596 // GO:0008219 // GO:0008283 // GO:0008284 // GO:0008285 // GO:0008347 // GO:0009611 // GO:0009790 // GO:0010…	cell morphogenesis // cartilage condensation // angiogenesis // eye development // response to hypoxia // epithelial to mesenchymal transition // epithelial to mesenchymal transition // hair follicle development // hair follicle development // blood vessel remodeling // platelet degranulation // heart morphogenesis // protein phosphorylation // cell cycle arrest // transforming growth factor beta…	GO:0005576 // GO:0005576 // GO:0005615 // GO:0030424 // GO:0031012 // GO:0031093 // GO:0043025 // GO:0005576 // GO:0005615 // GO:0030424 // GO:0043025	extracellular region // extracellular region // extracellular space // axon // extracellular matrix // platelet alpha granule lumen // neuronal cell body // extracellular region // extracellular space // axon // neuronal cell body	GO:0001540 // GO:0004702 // GO:0005102 // GO:0005114 // GO:0005114 // GO:0005125 // GO:0005160 // GO:0005515 // GO:0008083 // GO:0042803 // GO:0046982 // GO:0005160	beta-amyloid binding // receptor signaling protein serine/threonine kinase activity // receptor binding // type II transforming growth factor beta receptor binding // type II transforming growth factor beta receptor binding // cytokine activity // transforming growth factor beta receptor binding // protein binding // growth factor activity // protein homodimerization activity // protein heterodim…	---	---	chrNA:-1--1	TC01001805.hg.1	11.6513	12.2412	12.0576	10.209	9.52275	10.0981	11.9179	11.9594	11.9071	10.3844	10.1238	10.6357	7.19753	6.88656	7.09082	5.62559	5.4166	5.61095
42	TC01001825.hg.1	RP11-400N13.2	OTTHUMT00000091111	Havana transcript	cdna:all chromosome:VEGA56:1:221966410:221984964:1 Gene:OTTHUMG00000037424	FALSE	chr1	---	---	---	---	---	---	---	---	chrNA:-1--1	TC01001825.hg.1	14.832	15.0247	15.0431	15.179	14.9877	14.776	7.95631	8.03649	7.45453	6.97292	7.34942	7.89211	13.5555	13.5142	13.2678	14.701	15.0479	15.0225
43	TC01001838.hg.1	CAPN2	NM_001146068	RefSeq	Homo sapiens calpain 2, (m/II) large subunit (CAPN2), transcript variant 2, mRNA.	FALSE	chr1	GO:0001666 // GO:0001824 // GO:0006508 // GO:0006508 // GO:0007520 // GO:0016540 // GO:0051493 // GO:0051603 // GO:0071230 // GO:0006508 // GO:0006508	response to hypoxia // blastocyst development // proteolysis // proteolysis // myoblast fusion // protein autoprocessing // regulation of cytoskeleton organization // proteolysis involved in cellular protein catabolic process // cellular response to amino acid stimulus // proteolysis // proteolysis	GO:0000785 // GO:0005634 // GO:0005737 // GO:0005737 // GO:0005783 // GO:0005794 // GO:0005829 // GO:0005886 // GO:0030425 // GO:0030864 // GO:0031143 // GO:0045121 // GO:0070062 // GO:0097038 // GO:0005622 // GO:0005737 // GO:0005886 // GO:0016020	chromatin // nucleus // cytoplasm // cytoplasm // endoplasmic reticulum // Golgi apparatus // cytosol // plasma membrane // dendrite // cortical actin cytoskeleton // pseudopodium // membrane raft // extracellular vesicular exosome // perinuclear endoplasmic reticulum // intracellular // cytoplasm // plasma membrane // membrane	GO:0004198 // GO:0004198 // GO:0005509 // GO:0005515 // GO:0008092 // GO:0008234 // GO:0046982 // GO:0004198 // GO:0004198 // GO:0008092 // GO:0008233 // GO:0008234 // GO:0016787 // GO:0046872	calcium-dependent cysteine-type endopeptidase activity // calcium-dependent cysteine-type endopeptidase activity // calcium ion binding // protein binding // cytoskeletal protein binding // cysteine-type peptidase activity // protein heterodimerization activity // calcium-dependent cysteine-type endopeptidase activity // calcium-dependent cysteine-type endopeptidase activity // cytoskeletal prote…	GenMAPP	Integrin-mediated_cell_adhesion_KEGG	chrNA:-1--1	TC01001838.hg.1	9.59829	10.0021	9.72723	11.3818	11.7363	11.5287	8.96048	8.73269	8.88431	8.24478	8.4441	8.6639	10.2699	10.1075	10.3179	10.1892	11.0643	10.8906
44	TC01001857.hg.1	H3F3A	NM_002107	RefSeq	Homo sapiens H3 histone, family 3A (H3F3A), mRNA.	FALSE	chr1	GO:0006334 // GO:0006336 // GO:0007420 // GO:0007596 // GO:0009725 // GO:0030307	nucleosome assembly // DNA replication-independent nucleosome assembly // brain development // blood coagulation // response to hormone // positive regulation of cell growth	GO:0000228 // GO:0000786 // GO:0000788 // GO:0005576 // GO:0005634 // GO:0005634 // GO:0005654 // GO:0005694 // GO:0043234 // GO:0070062	nuclear chromosome // nucleosome // nuclear nucleosome // extracellular region // nucleus // nucleus // nucleoplasm // chromosome // protein complex // extracellular vesicular exosome	GO:0000979 // GO:0000980 // GO:0003677 // GO:0005515 // GO:0031492 // GO:0046982	RNA polymerase II core promoter sequence-specific DNA binding // RNA polymerase II distal enhancer sequence-specific DNA binding // DNA binding // protein binding // nucleosomal DNA binding // protein heterodimerization activity	---	---	chrNA:-1--1	TC01001857.hg.1	10.0632	9.86896	9.99431	8.95942	8.89875	9.0813	9.88465	9.78263	9.50627	9.834	9.5166	9.71955	10.1571	9.96222	9.76131	9.97207	9.61213	9.89279
45	TC01001976.hg.1	EXO1	NM_003686	RefSeq	Homo sapiens exonuclease 1 (EXO1), transcript variant 3, mRNA.	FALSE	chr1	GO:0000737 // GO:0000738 // GO:0002455 // GO:0006281 // GO:0006298 // GO:0006298 // GO:0006298 // GO:0006298 // GO:0006310 // GO:0007126 // GO:0016446 // GO:0045190 // GO:0090305 // GO:0090305 // GO:0090502 // GO:0002376 // GO:0006281 // GO:0006298 // GO:0006310 // GO:0006974 // GO:0090305	DNA catabolic process, endonucleolytic // DNA catabolic process, exonucleolytic // humoral immune response mediated by circulating immunoglobulin // DNA repair // mismatch repair // mismatch repair // mismatch repair // mismatch repair // DNA recombination // meiotic nuclear division // somatic hypermutation of immunoglobulin genes // isotype switching // nucleic acid phosphodiester bond hydrolys…	GO:0005634 // GO:0005634	nucleus // nucleus	GO:0003677 // GO:0004523 // GO:0004527 // GO:0005515 // GO:0008409 // GO:0035312 // GO:0043566 // GO:0045145 // GO:0046872 // GO:0048256 // GO:0051908 // GO:0003677 // GO:0003677 // GO:0003824 // GO:0004518 // GO:0004519 // GO:0004527 // GO:0008409 // GO:0016787 // GO:0016788	DNA binding // RNA-DNA hybrid ribonuclease activity // exonuclease activity // protein binding // 5'-3' exonuclease activity // 5'-3' exodeoxyribonuclease activity // structure-specific DNA binding // single-stranded DNA 5'-3' exodeoxyribonuclease activity // metal ion binding // flap endonuclease activity // double-stranded DNA 5'-3' exodeoxyribonuclease activity // DNA binding // DNA binding //…	---	---	chrNA:-1--1	TC01001976.hg.1	7.1152	7.0896	7.01259	7.01654	6.83565	7.18395	8.10413	7.63142	7.65349	7.62447	8.05509	8.2091	7.80143	7.66572	7.82976	5.87709	5.51417	5.64218
46	TC01002058.hg.1	RP4-669L17.2	OTTHUMT00000007987	Havana transcript	cdna:all chromosome:VEGA56:1:358872:365510:1 Gene:OTTHUMG00000002855	FALSE	chr1	---	---	---	---	---	---	---	---	chrNA:-1--1	TC01002058.hg.1	5.52911	4.97193	5.26029	5.12561	4.96013	4.74855	4.95749	5.00894	4.97366	5.06732	4.33788	5.38198	6.00868	5.87434	6.29642	7.34347	7.94085	7.51138
47	TC01002166.hg.1	ERRFI1	NM_018948	RefSeq	Homo sapiens ERBB receptor feedback inhibitor 1 (ERRFI1), mRNA.	FALSE	chr1	GO:0006950 // GO:0007175 // GO:0007175 // GO:0031953 // GO:0032321 // GO:0043589 // GO:0045616 // GO:0048286 // GO:0060426 // GO:0060428 // GO:0042059 // GO:0043589 // GO:0045616 // GO:0048286 // GO:0060426 // GO:0060428	response to stress // negative regulation of epidermal growth factor-activated receptor activity // negative regulation of epidermal growth factor-activated receptor activity // negative regulation of protein autophosphorylation // positive regulation of Rho GTPase activity // skin morphogenesis // regulation of keratinocyte differentiation // lung alveolus development // lung vasculature develop…	GO:0005634 // GO:0005737 // GO:0005737 // GO:0031234 // GO:0005737 // GO:0005737 // GO:0005886 // GO:0016020 // GO:0031234	nucleus // cytoplasm // cytoplasm // extrinsic component of cytoplasmic side of plasma membrane // cytoplasm // cytoplasm // plasma membrane // membrane // extrinsic component of cytoplasmic side of plasma membrane	GO:0005100 // GO:0005515 // GO:0019901 // GO:0019900	Rho GTPase activator activity // protein binding // protein kinase binding // kinase binding	---	---	chrNA:-1--1	TC01002166.hg.1	10.511	10.715	10.9165	11.0668	10.7033	11.3224	4.55837	4.58834	4.37368	4.55485	4.48651	4.6156	9.52015	9.42938	9.59886	10.5148	11.2292	11.6429
48	TC01002258.hg.1	EPHA2	NM_004431	RefSeq	Homo sapiens EPH receptor A2 (EPHA2), mRNA.	FALSE	chr1	GO:0001501 // GO:0001525 // GO:0001570 // GO:0001649 // GO:0007155 // GO:0007275 // GO:0008630 // GO:0010591 // GO:0014028 // GO:0016032 // GO:0016477 // GO:0018108 // GO:0018108 // GO:0021915 // GO:0030182 // GO:0030216 // GO:0030316 // GO:0032863 // GO:0033598 // GO:0033628 // GO:0036342 // GO:0043491 // GO:0043535 // GO:0045765 // GO:0046849 // GO:0048013 // GO:0048320 // GO:0051898 // GO:0060…	skeletal system development // angiogenesis // vasculogenesis // osteoblast differentiation // cell adhesion // multicellular organismal development // intrinsic apoptotic signaling pathway in response to DNA damage // regulation of lamellipodium assembly // notochord formation // viral process // cell migration // peptidyl-tyrosine phosphorylation // peptidyl-tyrosine phosphorylation // neural t…	GO:0005886 // GO:0005887 // GO:0005925 // GO:0031256 // GO:0031258 // GO:0032587 // GO:0005886 // GO:0005887 // GO:0005925 // GO:0016020 // GO:0016021 // GO:0030054 // GO:0042995	plasma membrane // integral component of plasma membrane // focal adhesion // leading edge membrane // lamellipodium membrane // ruffle membrane // plasma membrane // integral component of plasma membrane // focal adhesion // membrane // integral component of membrane // cell junction // cell projection	GO:0004714 // GO:0005003 // GO:0005515 // GO:0005524 // GO:0000166 // GO:0004672 // GO:0004713 // GO:0004714 // GO:0016301 // GO:0016740 // GO:0016772	transmembrane receptor protein tyrosine kinase activity // ephrin receptor activity // protein binding // ATP binding // nucleotide binding // protein kinase activity // protein tyrosine kinase activity // transmembrane receptor protein tyrosine kinase activity // kinase activity // transferase activity // transferase activity, transferring phosphorus-containing groups	---	---	chrNA:-1--1	TC01002258.hg.1	11.2527	12.0984	12.0907	13.2765	13.0739	13.6257	11.1404	10.9177	11.2432	8.4082	8.35783	9.00497	10.6918	10.7633	10.9976	10.7468	11.307	11.4267
49	TC01002351.hg.1	HMGCL	NM_000191	RefSeq	Homo sapiens 3-hydroxymethyl-3-methylglutaryl-CoA lyase (HMGCL), transcript variant 1, mRNA.	FALSE	chr1	GO:0001889 // GO:0006552 // GO:0006637 // GO:0007005 // GO:0007584 // GO:0009790 // GO:0042594 // GO:0044255 // GO:0044281 // GO:0046950 // GO:0046951 // GO:0046951 // GO:0051262 // GO:0070542 // GO:0046951 // GO:0008152	liver development // leucine catabolic process // acyl-CoA metabolic process // mitochondrion organization // response to nutrient // embryo development // response to starvation // cellular lipid metabolic process // small molecule metabolic process // cellular ketone body metabolic process // ketone body biosynthetic process // ketone body biosynthetic process // protein tetramerization // resp…	GO:0005739 // GO:0005743 // GO:0005759 // GO:0005759 // GO:0005777 // GO:0005739 // GO:0005759 // GO:0005777	mitochondrion // mitochondrial inner membrane // mitochondrial matrix // mitochondrial matrix // peroxisome // mitochondrion // mitochondrial matrix // peroxisome	GO:0000062 // GO:0000287 // GO:0004419 // GO:0004419 // GO:0005102 // GO:0030145 // GO:0031406 // GO:0042803 // GO:0046872 // GO:0003824 // GO:0004419 // GO:0016829 // GO:0046872	fatty-acyl-CoA binding // magnesium ion binding // hydroxymethylglutaryl-CoA lyase activity // hydroxymethylglutaryl-CoA lyase activity // receptor binding // manganese ion binding // carboxylic acid binding // protein homodimerization activity // metal ion binding // catalytic activity // hydroxymethylglutaryl-CoA lyase activity // lyase activity // metal ion binding	GenMAPP // HumanCyc // HumanCyc // HumanCyc	Synthesis_and_Degradation_of_Keton_Bodies_KEGG // LEU-DEG2-PWY // PWY-5074 // LEUDEG-PWY	chrNA:-1--1	TC01002351.hg.1	5.88341	5.79147	5.7872	5.93091	6.08891	5.98052	5.85926	5.91843	5.89124	6.85237	6.93997	6.86694	5.33693	5.65269	5.48718	6.3118	6.61386	6.38589
50	TC01002383.hg.1	STMN1	NM_001145454	RefSeq	Homo sapiens stathmin 1 (STMN1), transcript variant 4, mRNA.	FALSE	chr1	GO:0007019 // GO:0007052 // GO:0007165 // GO:0007409 // GO:0009615 // GO:0031115 // GO:0035556 // GO:0051272 // GO:0007275 // GO:0007399 // GO:0030154 // GO:0031110	microtubule depolymerization // mitotic spindle organization // signal transduction // axonogenesis // response to virus // negative regulation of microtubule polymerization // intracellular signal transduction // positive regulation of cellular component movement // multicellular organismal development // nervous system development // cell differentiation // regulation of microtubule polymerizat…	GO:0005622 // GO:0005829 // GO:0005874 // GO:0016020 // GO:0070062 // GO:0005737 // GO:0005856	intracellular // cytosol // microtubule // membrane // extracellular vesicular exosome // cytoplasm // cytoskeleton	GO:0004871 // GO:0015631	signal transducer activity // tubulin binding	---	---	chrNA:-1--1	TC01002383.hg.1	8.64495	8.60212	8.60411	8.02454	7.833	7.99206	8.93336	9.02323	8.90146	8.75021	8.78558	9.06207	8.21983	8.08038	8.0425	7.48739	7.21908	7.09934
51	TC01002441.hg.1	LAPTM5	NM_006762	RefSeq	Homo sapiens lysosomal protein transmembrane 5 (LAPTM5), mRNA.	FALSE	chr1	GO:0006810	transport	GO:0005764 // GO:0005765 // GO:0005887 // GO:0005764 // GO:0005887 // GO:0016020 // GO:0016021	lysosome // lysosomal membrane // integral component of plasma membrane // lysosome // integral component of plasma membrane // membrane // integral component of membrane	---	---	---	---	chrNA:-1--1	TC01002441.hg.1	8.24454	8.81255	8.80131	7.30373	6.83264	7.10454	5.45657	5.62319	5.55415	5.18053	5.16489	5.42932	8.10718	8.05767	7.82417	6.38575	6.31281	6.15466
52	TC01002475.hg.1	YARS	NM_003680	RefSeq	Homo sapiens tyrosyl-tRNA synthetase (YARS), mRNA.	FALSE	chr1	GO:0006418 // GO:0006437 // GO:0006915 // GO:0007165 // GO:0010467 // GO:0006412 // GO:0006418 // GO:0006437 // GO:0008219	tRNA aminoacylation for protein translation // tyrosyl-tRNA aminoacylation // apoptotic process // signal transduction // gene expression // translation // tRNA aminoacylation for protein translation // tyrosyl-tRNA aminoacylation // cell death	GO:0005615 // GO:0005634 // GO:0005737 // GO:0005829 // GO:0005737 // GO:0005737	extracellular space // nucleus // cytoplasm // cytosol // cytoplasm // cytoplasm	GO:0000049 // GO:0004831 // GO:0004871 // GO:0005153 // GO:0005524 // GO:0044822 // GO:0000166 // GO:0003723 // GO:0004812 // GO:0004831 // GO:0016874	tRNA binding // tyrosine-tRNA ligase activity // signal transducer activity // interleukin-8 receptor binding // ATP binding // poly(A) RNA binding // nucleotide binding // RNA binding // aminoacyl-tRNA ligase activity // tyrosine-tRNA ligase activity // ligase activity	HumanCyc	TRNA-CHARGING-PWY	chrNA:-1--1	TC01002475.hg.1	7.18769	7.34471	7.26574	8.69696	8.54913	9.21024	8.19778	7.94269	8.09888	9.21721	9.09071	9.51051	8.33663	8.48504	8.31866	8.47442	9.14297	9.00908
53	TC01002500.hg.1	CLSPN	NM_001190481	RefSeq	Homo sapiens claspin (CLSPN), transcript variant 2, mRNA.	FALSE	chr1	GO:0000077 // GO:0006260 // GO:0006281 // GO:0006915 // GO:0006921 // GO:0018105 // GO:0031572 // GO:0032147 // GO:0033314 // GO:0006974 // GO:0007049	DNA damage checkpoint // DNA replication // DNA repair // apoptotic process // cellular component disassembly involved in execution phase of apoptosis // peptidyl-serine phosphorylation // G2 DNA damage checkpoint // activation of protein kinase activity // mitotic DNA replication checkpoint // cellular response to DNA damage stimulus // cell cycle	GO:0005654 // GO:0005634	nucleoplasm // nucleus	GO:0003677 // GO:0005515 // GO:0010997	DNA binding // protein binding // anaphase-promoting complex binding	---	---	chrNA:-1--1	TC01002500.hg.1	7.58831	7.62808	7.69838	8.01365	7.93819	8.29096	8.55362	8.49203	8.60139	8.24735	8.28876	8.48639	8.30526	8.31877	8.23922	6.05321	5.62842	5.49174
54	TC01002550.hg.1	---	ENST00000365352	ENSEMBL	ncrna:novel chromosome:GRCh38:1:39881566:39881678:-1 gene:ENSG00000202222 gene_biotype:misc_RNA transcript_biotype:misc_RNA	FALSE	chr1	---	---	---	---	---	---	---	---	chrNA:-1--1	TC01002550.hg.1	5.49952	5.60532	5.53494	5.9224	6.08311	6.32967	6.40257	6.40135	6.46156	5.31037	5.39189	5.56706	7.24867	7.01949	6.3907	6.60343	5.78719	6.67119
55	TC01002658.hg.1	ORC1	NM_001190818	RefSeq	Homo sapiens origin recognition complex, subunit 1 (ORC1), transcript variant 2, mRNA.	FALSE	chr1	GO:0000082 // GO:0000083 // GO:0000278 // GO:0006260 // GO:0006270 // GO:0006260 // GO:0008152	G1/S transition of mitotic cell cycle // regulation of transcription involved in G1/S transition of mitotic cell cycle // mitotic cell cycle // DNA replication // DNA replication initiation // DNA replication // metabolic process	GO:0000808 // GO:0005634 // GO:0005654 // GO:0005664 // GO:0005730 // GO:0005737 // GO:0005829 // GO:0005886 // GO:0005634 // GO:0005634	origin recognition complex // nucleus // nucleoplasm // nuclear origin of replication recognition complex // nucleolus // cytoplasm // cytosol // plasma membrane // nucleus // nucleus	GO:0003677 // GO:0003682 // GO:0005515 // GO:0005524 // GO:0017111 // GO:0000166 // GO:0003677	DNA binding // chromatin binding // protein binding // ATP binding // nucleoside-triphosphatase activity // nucleotide binding // DNA binding	GenMAPP // GenMAPP // GenMAPP	Cell_cycle_KEGG // DNA_replication_Reactome // G1_to_S_cell_cycle_Reactome	chrNA:-1--1	TC01002658.hg.1	6.49605	6.81539	6.42742	6.44384	6.65369	6.83692	7.35804	7.02603	7.39829	6.92807	6.48513	7.0391	7.75573	7.94374	7.89061	5.0411	4.99184	5.07688
56	TC01002663.hg.1	---	ENST00000442174	ENSEMBL	[retired]cdna:pseudogene chromosome:GRCh37:1:53458868:53459251:-1 gene:ENSG00000236360 gene_biotype:pseudogene transcript_biotype:processed_pseudogene	FALSE	chr1	---	---	---	---	---	---	---	---	chrNA:-1--1	TC01002663.hg.1	9.11492	9.63214	9.40358	10.3181	10.1311	10.6794	11.8561	11.3921	11.0643	10.9411	10.7771	11.3797	11.0768	10.9595	10.9097	12.1327	12.1601	12.1116
57	TC01002669.hg.1	LRP8	NM_001018054	RefSeq	Homo sapiens low density lipoprotein receptor-related protein 8, apolipoprotein e receptor (LRP8), transcript variant 4, mRNA.	FALSE	chr1	GO:0000122 // GO:0001523 // GO:0006508 // GO:0006629 // GO:0006897 // GO:0006898 // GO:0007165 // GO:0007596 // GO:0007603 // GO:0019221 // GO:0021541 // GO:0021819 // GO:0032793 // GO:0038026 // GO:0042493 // GO:0050731 // GO:0050804 // GO:0061003 // GO:0061098 // GO:0071363 // GO:0071397 // GO:1900006 // GO:0006629 // GO:0006897 // GO:0021766 // GO:0021987 // GO:0045860	negative regulation of transcription from RNA polymerase II promoter // retinoid metabolic process // proteolysis // lipid metabolic process // endocytosis // receptor-mediated endocytosis // signal transduction // blood coagulation // phototransduction, visible light // cytokine-mediated signaling pathway // ammon gyrus development // layer formation in cerebral cortex // positive regulation of …	GO:0005576 // GO:0005875 // GO:0005886 // GO:0005901 // GO:0014069 // GO:0016021 // GO:0030425 // GO:0043025 // GO:0043235 // GO:0005886 // GO:0005886 // GO:0016020 // GO:0016020 // GO:0016021	extracellular region // microtubule associated complex // plasma membrane // caveola // postsynaptic density // integral component of membrane // dendrite // neuronal cell body // receptor complex // plasma membrane // plasma membrane // membrane // membrane // integral component of membrane	GO:0004888 // GO:0005509 // GO:0005515 // GO:0008035 // GO:0019894 // GO:0030229 // GO:0034185 // GO:0038025	transmembrane signaling receptor activity // calcium ion binding // protein binding // high-density lipoprotein particle binding // kinesin binding // very-low-density lipoprotein particle receptor activity // apolipoprotein binding // reelin receptor activity	---	---	chrNA:-1--1	TC01002669.hg.1	7.38925	7.62578	7.5889	9.25297	9.35389	9.93523	9.17451	9.12982	9.39091	8.57888	8.21822	8.69537	9.71885	9.95314	9.75776	9.64959	9.79748	9.84631
58	TC01002676.hg.1	NDC1	NM_001168551	RefSeq	Homo sapiens NDC1 transmembrane nucleoporin (NDC1), transcript variant 2, mRNA.	FALSE	chr1	GO:0015031 // GO:0031081 // GO:0051028 // GO:0051292 // GO:0006810 // GO:0015031	protein transport // nuclear pore distribution // mRNA transport // nuclear pore complex assembly // transport // protein transport	GO:0005643 // GO:0031965 // GO:0005634 // GO:0005643 // GO:0016020 // GO:0016020 // GO:0016021	nuclear pore // nuclear membrane // nucleus // nuclear pore // membrane // membrane // integral component of membrane	GO:0017056	structural constituent of nuclear pore	---	---	chrNA:-1--1	TC01002676.hg.1	11.2988	11.0929	10.9035	10.7516	10.7432	10.5835	10.8969	11.4815	11.4436	10.406	10.5719	10.7379	10.6779	10.8234	11.0205	8.93834	9.13255	9.0642
59	TC01002693.hg.1	RP11-67L3.6	OTTHUMT00000097389	Havana transcript	[retired] cdna:all chromosome:VEGA50:1:55314138:55316072:-1 Gene:OTTHUMG00000040471	FALSE	chr1	---	---	---	---	---	---	---	---	chrNA:-1--1	TC01002693.hg.1	7.37971	8.43358	7.85363	8.79965	8.30917	8.834	8.90697	9.83809	10.0612	9.0194	9.00843	9.5399	8.2496	8.43754	8.65039	9.53966	10.5779	10.3067
60	TC01002694.hg.1	DHCR24	NM_014762	RefSeq	Homo sapiens 24-dehydrocholesterol reductase (DHCR24), mRNA.	FALSE	chr1	GO:0006695 // GO:0006695 // GO:0006695 // GO:0006695 // GO:0006695 // GO:0006915 // GO:0006979 // GO:0007050 // GO:0007265 // GO:0008104 // GO:0008285 // GO:0009725 // GO:0009888 // GO:0030539 // GO:0031639 // GO:0042987 // GO:0043066 // GO:0043154 // GO:0043588 // GO:0044281 // GO:0055114 // GO:1901214 // GO:0006629 // GO:0006694 // GO:0008202 // GO:0008203 // GO:0016125 // GO:0016126 // GO:0043…	cholesterol biosynthetic process // cholesterol biosynthetic process // cholesterol biosynthetic process // cholesterol biosynthetic process // cholesterol biosynthetic process // apoptotic process // response to oxidative stress // cell cycle arrest // Ras protein signal transduction // protein localization // negative regulation of cell proliferation // response to hormone // tissue development…	GO:0000139 // GO:0005634 // GO:0005783 // GO:0005789 // GO:0005789 // GO:0005829 // GO:0005856 // GO:0016021 // GO:0005737 // GO:0005783 // GO:0005789 // GO:0005794 // GO:0016020 // GO:0016020	Golgi membrane // nucleus // endoplasmic reticulum // endoplasmic reticulum membrane // endoplasmic reticulum membrane // cytosol // cytoskeleton // integral component of membrane // cytoplasm // endoplasmic reticulum // endoplasmic reticulum membrane // Golgi apparatus // membrane // membrane	GO:0008762 // GO:0016628 // GO:0019899 // GO:0042605 // GO:0050614 // GO:0050660 // GO:0003824 // GO:0016491 // GO:0016614	UDP-N-acetylmuramate dehydrogenase activity // oxidoreductase activity, acting on the CH-CH group of donors, NAD or NADP as acceptor // enzyme binding // peptide antigen binding // delta24-sterol reductase activity // flavin adenine dinucleotide binding // catalytic activity // oxidoreductase activity // oxidoreductase activity, acting on CH-OH group of donors	HumanCyc // HumanCyc // HumanCyc	PWY66-341 // PWY66-3 // PWY66-4	chrNA:-1--1	TC01002694.hg.1	12.7736	13.6055	13.1705	14.0739	13.9587	14.236	14.4971	14.8608	15.0522	14.3187	13.9509	14.6581	13.4369	13.6387	13.9843	14.7554	15.3816	15.2193
61	TC01002733.hg.1	ITGB3BP	NM_001206739	RefSeq	Homo sapiens integrin beta 3 binding protein (beta3-endonexin) (ITGB3BP), transcript variant 1, mRNA.	FALSE	chr1	GO:0000278 // GO:0006334 // GO:0006351 // GO:0006355 // GO:0007067 // GO:0007155 // GO:0007165 // GO:0034080 // GO:0043065 // GO:0048011 // GO:0097190 // GO:0006915 // GO:0007049 // GO:0034080 // GO:0051301	mitotic cell cycle // nucleosome assembly // transcription, DNA-templated // regulation of transcription, DNA-templated // mitotic nuclear division // cell adhesion // signal transduction // centromere-specific nucleosome assembly // positive regulation of apoptotic process // neurotrophin TRK receptor signaling pathway // apoptotic signaling pathway // apoptotic process // cell cycle // centrome…	GO:0000777 // GO:0005634 // GO:0005654 // GO:0005730 // GO:0005737 // GO:0005829 // GO:0016020 // GO:0000775 // GO:0000776 // GO:0005634 // GO:0005634 // GO:0005694 // GO:0005737	condensed chromosome kinetochore // nucleus // nucleoplasm // nucleolus // cytoplasm // cytosol // membrane // chromosome, centromeric region // kinetochore // nucleus // nucleus // chromosome // cytoplasm	GO:0004871 // GO:0008022	signal transducer activity // protein C-terminus binding	---	---	chrNA:-1--1	TC01002733.hg.1	8.99038	9.11184	8.91993	9.12546	8.89924	8.98756	8.27373	8.29775	8.05646	8.36818	8.2037	8.71324	8.72031	8.82798	8.72027	7.35694	6.83199	7.2406
62	TC01002766.hg.1	DEPDC1	NM_001114120	RefSeq	Homo sapiens DEP domain containing 1 (DEPDC1), transcript variant 1, mRNA.	FALSE	chr1	GO:0006351 // GO:0035556 // GO:0043547 // GO:0045892 // GO:0006355 // GO:0007165	transcription, DNA-templated // intracellular signal transduction // positive regulation of GTPase activity // negative regulation of transcription, DNA-templated // regulation of transcription, DNA-templated // signal transduction	GO:0005634 // GO:0017053 // GO:0005622 // GO:0005634	nucleus // transcriptional repressor complex // intracellular // nucleus	GO:0005096 // GO:0005515	GTPase activator activity // protein binding	---	---	chrNA:-1--1	TC01002766.hg.1	8.35982	8.71681	8.7243	8.27533	8.29947	8.56286	9.98062	9.72622	9.34329	8.75241	8.73899	9.18666	9.70701	9.89333	9.73297	8.04134	7.44853	7.65609
63	TC01002882.hg.1	GCLM	NM_002061	RefSeq	Homo sapiens glutamate-cysteine ligase, modifier subunit (GCLM), mRNA.	FALSE	chr1	GO:0000096 // GO:0006534 // GO:0006536 // GO:0006750 // GO:0006750 // GO:0006750 // GO:0006750 // GO:0006805 // GO:0006979 // GO:0008637 // GO:0034641 // GO:0035229 // GO:0042493 // GO:0043524 // GO:0044281 // GO:0050880 // GO:0051409 // GO:0051900 // GO:1901687 // GO:2001237 // GO:0006749	sulfur amino acid metabolic process // cysteine metabolic process // glutamate metabolic process // glutathione biosynthetic process // glutathione biosynthetic process // glutathione biosynthetic process // glutathione biosynthetic process // xenobiotic metabolic process // response to oxidative stress // apoptotic mitochondrial changes // cellular nitrogen compound metabolic process // positive…	GO:0005829 // GO:0005829 // GO:0017109	cytosol // cytosol // glutamate-cysteine ligase complex	GO:0004357 // GO:0004357 // GO:0035226 // GO:0046982 // GO:0004357	glutamate-cysteine ligase activity // glutamate-cysteine ligase activity // glutamate-cysteine ligase catalytic subunit binding // protein heterodimerization activity // glutamate-cysteine ligase activity	---	---	chrNA:-1--1	TC01002882.hg.1	6.02328	5.9054	6.1934	7.24842	7.30734	7.39465	7.98922	7.66631	7.41549	7.82875	7.48847	7.76936	10.8145	10.1619	10.3411	9.77028	10.7373	10.9559
64	TC01002884.hg.1	ARHGAP29	NM_004815	RefSeq	Homo sapiens Rho GTPase activating protein 29 (ARHGAP29), mRNA.	FALSE	chr1	GO:0007264 // GO:0007266 // GO:0032321 // GO:0051056 // GO:0007165 // GO:0035556 // GO:0043547	small GTPase mediated signal transduction // Rho protein signal transduction // positive regulation of Rho GTPase activity // regulation of small GTPase mediated signal transduction // signal transduction // intracellular signal transduction // positive regulation of GTPase activity	GO:0005829 // GO:0005622	cytosol // intracellular	GO:0005100 // GO:0030165 // GO:0046872 // GO:0005096	Rho GTPase activator activity // PDZ domain binding // metal ion binding // GTPase activator activity	---	---	chrNA:-1--1	TC01002884.hg.1	10.6385	11.0323	11.0948	11.1768	10.9062	11.7434	8.16318	8.06274	8.00645	6.7486	6.73177	7.02835	8.00266	8.09779	8.11865	7.52695	7.89869	7.91844
65	TC01002915.hg.1	RP4-714D9.2	OTTHUMT00000029655	Havana transcript	cdna:all chromosome:VEGA56:1:100057990:100084471:-1 Gene:OTTHUMG00000010753	FALSE	chr1	---	---	---	---	---	---	---	---	chrNA:-1--1	TC01002915.hg.1	7.02342	6.93879	6.9432	7.32932	7.1072	7.04554	7.18334	6.67492	7.4265	7.6656	6.47581	6.80692	7.5822	7.65596	7.51577	6.37196	6.335	6.49284
66	TC01002916.hg.1	SASS6	NM_194292	RefSeq	Homo sapiens spindle assembly 6 homolog (C. elegans) (SASS6), mRNA.	FALSE	chr1	GO:0007099 // GO:0051298 // GO:0007049	centriole replication // centrosome duplication // cell cycle	GO:0005813 // GO:0005813 // GO:0005814 // GO:0098536 // GO:0005737 // GO:0005814 // GO:0005815 // GO:0005856	centrosome // centrosome // centriole // deuterosome // cytoplasm // centriole // microtubule organizing center // cytoskeleton	GO:0005515	protein binding	---	---	chrNA:-1--1	TC01002916.hg.1	8.26492	8.56636	8.43154	8.77797	8.52707	8.82634	8.84486	8.50105	8.50775	8.5761	8.40015	8.70385	9.14481	9.24053	9.22239	7.56747	7.52623	7.61098
67	TC01003025.hg.1	RNU6-817P	ENST00000391083	ENSEMBL	ncrna:known chromosome:GRCh38:1:116413766:116413869:-1 gene:ENSG00000212385 gene_biotype:snRNA transcript_biotype:snRNA	FALSE	chr1	---	---	---	---	---	---	---	---	chrNA:-1--1	TC01003025.hg.1	7.14662	7.0072	6.82311	7.80008	7.58983	7.74059	7.18572	7.7147	7.03923	8.0818	7.97671	8.22462	7.71754	7.52444	7.53356	9.65249	10.3181	10.3303
68	TC01003085.hg.1	FAM72D	NM_207418	RefSeq	Homo sapiens family with sequence similarity 72, member D (FAM72D), mRNA.	FALSE	chr1	---	---	---	---	---	---	---	---	chrNA:-1--1	TC01003085.hg.1	7.6548	8.65868	8.56287	9.1246	8.84472	8.66457	8.06481	7.9182	7.80675	7.06186	7.90936	8.14671	9.08832	9.23518	9.06558	6.6604	6.50296	6.7693
69	TC01003096.hg.1	PDE4DIP	NM_001002810	RefSeq	Homo sapiens phosphodiesterase 4D interacting protein (PDE4DIP), transcript variant 4, mRNA.	FALSE	chr1	GO:0043623	cellular protein complex assembly	GO:0005634 // GO:0005737 // GO:0005794 // GO:0005813 // GO:0005813 // GO:0030016 // GO:0005634 // GO:0005737 // GO:0005794 // GO:0005815 // GO:0005856	nucleus // cytoplasm // Golgi apparatus // centrosome // centrosome // myofibril // nucleus // cytoplasm // Golgi apparatus // microtubule organizing center // cytoskeleton	GO:0005515 // GO:0019899	protein binding // enzyme binding	---	---	chrNA:-1--1	TC01003096.hg.1	6.78478	6.92185	6.84331	7.64707	7.69667	7.83226	7.12786	7.6159	7.75156	8.03492	8.34136	8.53237	6.03448	5.99779	6.04414	6.27254	5.94659	5.99662
70	TC01003122.hg.1	---	uc021ovh.1	UCSC Genes	transfer RNA Gln (anticodon CTG)	FALSE	chr1	---	---	---	---	---	---	---	---	chrNA:-1--1	TC01003122.hg.1	5.15249	5.45755	5.21426	6.24994	6.36033	6.51287	5.42875	4.6886	6.20343	5.2717	5.37738	5.42092	4.48127	4.30465	4.57743	4.34844	4.54101	5.11134
71	TC01003129.hg.1	GJA5	NM_005266	RefSeq	Homo sapiens gap junction protein, alpha 5, 40kDa (GJA5), transcript variant A, mRNA.	FALSE	chr1	GO:0001501 // GO:0001525 // GO:0003105 // GO:0003151 // GO:0003158 // GO:0003161 // GO:0003174 // GO:0003193 // GO:0003281 // GO:0003283 // GO:0003284 // GO:0003294 // GO:0006813 // GO:0010643 // GO:0010652 // GO:0016264 // GO:0016264 // GO:0030326 // GO:0035050 // GO:0035922 // GO:0045776 // GO:0045907 // GO:0045909 // GO:0048844 // GO:0051259 // GO:0055085 // GO:0055085 // GO:0055117 // GO:0060…	skeletal system development // angiogenesis // negative regulation of glomerular filtration // outflow tract morphogenesis // endothelium development // cardiac conduction system development // mitral valve development // pulmonary valve formation // ventricular septum development // atrial septum development // septum primum development // atrial ventricular junction remodeling // potassium ion …	GO:0005887 // GO:0005921 // GO:0005922 // GO:0014704 // GO:0014704 // GO:0042995 // GO:0005886 // GO:0005921 // GO:0005922 // GO:0016020 // GO:0016021 // GO:0030054	integral component of plasma membrane // gap junction // connexon complex // intercalated disc // intercalated disc // cell projection // plasma membrane // gap junction // connexon complex // membrane // integral component of membrane // cell junction	GO:0055077 // GO:0071253 // GO:0086075 // GO:0086075 // GO:0086077 // GO:0005243	gap junction hemi-channel activity // connexin binding // gap junction channel activity involved in cardiac conduction electrical coupling // gap junction channel activity involved in cardiac conduction electrical coupling // gap junction channel activity involved in AV node cell-bundle of His cell electrical coupling // gap junction channel activity	GenMAPP	Calcium_regulation_in_cardiac_cells	chrNA:-1--1	TC01003129.hg.1	4.70566	4.15023	4.50143	4.30258	4.46212	4.30351	6.94831	7.01825	7.51415	5.29084	5.27428	5.22684	4.64977	4.66426	4.48245	4.76032	4.43938	4.39853
72	TC01003174.hg.1	FAM72C	ENST00000369175	ENSEMBL	havana:novel chromosome:GRCh38:1:143955878:143971965:-1 gene:ENSG00000263513 gene_biotype:protein_coding transcript_biotype:protein_coding gene:ENSG00000203817	FALSE	chr1	---	---	---	---	---	---	---	---	chrNA:-1--1	TC01003174.hg.1	6.58176	7.42623	7.3579	7.86497	7.88231	7.82662	7.00277	7.22243	6.65465	6.31761	7.26685	7.40487	8.10159	7.8903	8.26106	6.41171	6.12387	6.44399
73	TC01003192.hg.1	HIST2H4B	NM_001034077	RefSeq	Homo sapiens histone cluster 2, H4b (HIST2H4B), mRNA.	FALSE	chr1	GO:0000278 // GO:0000723 // GO:0006325 // GO:0006325 // GO:0006334 // GO:0006335 // GO:0006336 // GO:0034080 // GO:0035574 // GO:0045653 // GO:0048015 // GO:0006334	mitotic cell cycle // telomere maintenance // chromatin organization // chromatin organization // nucleosome assembly // DNA replication-dependent nucleosome assembly // DNA replication-independent nucleosome assembly // centromere-specific nucleosome assembly // histone H4-K20 demethylation // negative regulation of megakaryocyte differentiation // phosphatidylinositol-mediated signaling // nucl…	GO:0000228 // GO:0000786 // GO:0005576 // GO:0005634 // GO:0005654 // GO:0043234 // GO:0070062 // GO:0000786 // GO:0005634 // GO:0005694 // GO:0016020	nuclear chromosome // nucleosome // extracellular region // nucleus // nucleoplasm // protein complex // extracellular vesicular exosome // nucleosome // nucleus // chromosome // membrane	GO:0003677 // GO:0005515 // GO:0035575 // GO:0044822 // GO:0046982 // GO:0003677	DNA binding // protein binding // histone demethylase activity (H4-K20 specific) // poly(A) RNA binding // protein heterodimerization activity // DNA binding	---	---	chrNA:-1--1	TC01003192.hg.1	6.58944	6.85789	6.61124	7.29951	7.3223	7.53754	6.12022	6.2734	6.33133	8.30097	8.55262	8.58675	5.76309	5.43781	5.5151	5.05062	5.09549	4.82498
74	TC01003194.hg.1	HIST2H2AB	NM_175065	RefSeq	Homo sapiens histone cluster 2, H2ab (HIST2H2AB), mRNA.	FALSE	chr1	GO:0006334 // GO:0008150	nucleosome assembly // biological_process	GO:0000786 // GO:0005634 // GO:0070062 // GO:0005634 // GO:0005694	nucleosome // nucleus // extracellular vesicular exosome // nucleus // chromosome	GO:0003677 // GO:0046982 // GO:0003674	DNA binding // protein heterodimerization activity // molecular_function	---	---	chrNA:-1--1	TC01003194.hg.1	9.76842	10.1479	10.4561	9.26415	8.90046	9.6545	12.8354	11.4462	10.9836	12.0033	10.6451	11.3809	13.3248	12.8884	11.8722	8.74773	7.70472	8.42048
75	TC01003305.hg.1	THBS3	NM_001252607	RefSeq	Homo sapiens thrombospondin 3 (THBS3), transcript variant 2, mRNA.	FALSE	chr1	GO:0003417 // GO:0007160 // GO:0043931 // GO:0060346 // GO:0007155	growth plate cartilage development // cell-matrix adhesion // ossification involved in bone maturation // bone trabecula formation // cell adhesion	GO:0005576 // GO:0048471 // GO:0005576	extracellular region // perinuclear region of cytoplasm // extracellular region	GO:0005509 // GO:0008201 // GO:0005509 // GO:0008201	calcium ion binding // heparin binding // calcium ion binding // heparin binding	GenMAPP	Inflammatory_Response_Pathway	chrNA:-1--1	TC01003305.hg.1	6.44475	6.72747	6.66616	6.55959	6.66356	6.51763	6.64717	7.14552	7.08414	7.54633	7.89336	7.92058	6.26529	6.22832	6.33007	7.40671	7.67722	7.39743
76	TC01003306.hg.1	RP11-263K19.6	OTTHUMT00000086863	Havana transcript	cdna:all chromosome:VEGA56:1:155211151:155213819:-1 Gene:OTTHUMG00000035711	FALSE	chr1	---	---	---	---	---	---	---	---	chrNA:-1--1	TC01003306.hg.1	7.04429	7.29519	7.20164	7.34063	7.57965	7.38113	7.15138	7.18028	7.18093	8.591	9.09395	8.92899	6.66424	6.60016	6.59878	6.84572	7.22455	6.57931
77	TC01003343.hg.1	IQGAP3	NM_178229	RefSeq	Homo sapiens IQ motif containing GTPase activating protein 3 (IQGAP3), mRNA.	FALSE	chr1	GO:0000082 // GO:0000187 // GO:0007265 // GO:0008361 // GO:0010628 // GO:0010629 // GO:0032320 // GO:0033601 // GO:0070371 // GO:0071310 // GO:0001934 // GO:0007165 // GO:0007264 // GO:0043547 // GO:0051056	G1/S transition of mitotic cell cycle // activation of MAPK activity // Ras protein signal transduction // regulation of cell size // positive regulation of gene expression // negative regulation of gene expression // positive regulation of Ras GTPase activity // positive regulation of mammary gland epithelial cell proliferation // ERK1 and ERK2 cascade // cellular response to organic substance /…	GO:0005737 // GO:0005911 // GO:0016328 // GO:0005622	cytoplasm // cell-cell junction // lateral plasma membrane // intracellular	GO:0005099 // GO:0005516 // GO:0017048 // GO:0005096 // GO:0017016	Ras GTPase activator activity // calmodulin binding // Rho GTPase binding // GTPase activator activity // Ras GTPase binding	---	---	chrNA:-1--1	TC01003343.hg.1	8.50872	9.09591	8.96106	9.24106	9.26428	9.48729	8.28592	8.01555	8.32766	8.00492	7.86259	8.27319	8.5032	8.52991	8.61866	6.88795	6.8692	6.83579
78	TC01003566.hg.1	ABL2	NM_001136000	RefSeq	Homo sapiens ABL proto-oncogene 2, non-receptor tyrosine kinase (ABL2), transcript variant d, mRNA.	FALSE	chr1	GO:0006464 // GO:0007155 // GO:0007165 // GO:0007411 // GO:0010506 // GO:0010976 // GO:0018108 // GO:0030100 // GO:0030155 // GO:0051017 // GO:0051353 // GO:0071300 // GO:2000145 // GO:2000249 // GO:0006468 // GO:0007015 // GO:0016310	cellular protein modification process // cell adhesion // signal transduction // axon guidance // regulation of autophagy // positive regulation of neuron projection development // peptidyl-tyrosine phosphorylation // regulation of endocytosis // regulation of cell adhesion // actin filament bundle assembly // positive regulation of oxidoreductase activity // cellular response to retinoic acid //…	GO:0005829 // GO:0015629 // GO:0005737 // GO:0005856 // GO:0015629	cytosol // actin cytoskeleton // cytoplasm // cytoskeleton // actin cytoskeleton	GO:0000287 // GO:0003785 // GO:0004672 // GO:0004713 // GO:0004715 // GO:0005515 // GO:0005524 // GO:0030145 // GO:0051015 // GO:0000166 // GO:0004672 // GO:0004713 // GO:0004715 // GO:0016301 // GO:0016740 // GO:0016772 // GO:0046872	magnesium ion binding // actin monomer binding // protein kinase activity // protein tyrosine kinase activity // non-membrane spanning protein tyrosine kinase activity // protein binding // ATP binding // manganese ion binding // actin filament binding // nucleotide binding // protein kinase activity // protein tyrosine kinase activity // non-membrane spanning protein tyrosine kinase activity // …	---	---	chrNA:-1--1	TC01003566.hg.1	8.37691	8.79098	8.55686	10.5921	10.5146	10.499	8.65788	8.66866	8.72447	8.95162	9.01395	9.14622	7.34889	7.31004	7.3532	7.65098	8.01769	8.0779
79	TC01003624.hg.1	FAM129A	NM_052966	RefSeq	Homo sapiens family with sequence similarity 129, member A (FAM129A), mRNA.	FALSE	chr1	GO:0001933 // GO:0001934 // GO:0034976 // GO:0045727 // GO:0001933 // GO:0001934 // GO:0006417 // GO:0006950 // GO:0034976 // GO:0045727	negative regulation of protein phosphorylation // positive regulation of protein phosphorylation // response to endoplasmic reticulum stress // positive regulation of translation // negative regulation of protein phosphorylation // positive regulation of protein phosphorylation // regulation of translation // response to stress // response to endoplasmic reticulum stress // positive regulation of…	GO:0005737 // GO:0005886 // GO:0070062 // GO:0005737 // GO:0016020	cytoplasm // plasma membrane // extracellular vesicular exosome // cytoplasm // membrane	GO:0005515 // GO:0003674	protein binding // molecular_function	---	---	chrNA:-1--1	TC01003624.hg.1	9.21288	9.55153	9.61919	8.99619	8.81147	9.29155	8.53214	8.35701	8.22192	9.62742	9.75117	9.98442	6.31961	6.55677	6.5738	5.97473	6.03129	6.12312
80	TC01003638.hg.1	PTGS2	NM_000963	RefSeq	Homo sapiens prostaglandin-endoperoxide synthase 2 (prostaglandin G/H synthase and cyclooxygenase) (PTGS2), mRNA.	FALSE	chr1	GO:0001516 // GO:0001516 // GO:0001525 // GO:0006693 // GO:0006928 // GO:0006954 // GO:0006979 // GO:0007566 // GO:0007612 // GO:0007613 // GO:0008217 // GO:0008285 // GO:0009750 // GO:0010042 // GO:0010226 // GO:0010575 // GO:0019233 // GO:0019369 // GO:0019371 // GO:0019371 // GO:0019372 // GO:0030282 // GO:0030728 // GO:0031394 // GO:0031622 // GO:0031915 // GO:0032227 // GO:0032355 // GO:0032…	prostaglandin biosynthetic process // prostaglandin biosynthetic process // angiogenesis // prostaglandin metabolic process // cellular component movement // inflammatory response // response to oxidative stress // embryo implantation // learning // memory // regulation of blood pressure // negative regulation of cell proliferation // response to fructose // response to manganese ion // response …	GO:0005634 // GO:0005737 // GO:0005737 // GO:0005789 // GO:0043005 // GO:0043234 // GO:0005737 // GO:0005783 // GO:0005789 // GO:0016020 // GO:0031090 // GO:0043005 // GO:0043231	nucleus // cytoplasm // cytoplasm // endoplasmic reticulum membrane // neuron projection // protein complex // cytoplasm // endoplasmic reticulum // endoplasmic reticulum membrane // membrane // organelle membrane // neuron projection // intracellular membrane-bounded organelle	GO:0004601 // GO:0004666 // GO:0008289 // GO:0019899 // GO:0020037 // GO:0042803 // GO:0046872 // GO:0050473 // GO:0004601 // GO:0004666 // GO:0016491 // GO:0016702 // GO:0020037 // GO:0051213	peroxidase activity // prostaglandin-endoperoxide synthase activity // lipid binding // enzyme binding // heme binding // protein homodimerization activity // metal ion binding // arachidonate 15-lipoxygenase activity // peroxidase activity // prostaglandin-endoperoxide synthase activity // oxidoreductase activity // oxidoreductase activity, acting on single donors with incorporation of molecular…	GenMAPP // GenMAPP // MetaCyc // MetaCyc // MetaCyc // MetaCyc	Eicosanoid_Synthesis // Prostaglandin_synthesis_regulation // PWY66-394 // PWY66-395 // PWY66-393 // PWY66-374	chrNA:-1--1	TC01003638.hg.1	8.01791	8.92588	8.9172	10.0327	10.3377	11.0823	4.72311	5.04503	4.9829	5.65078	5.65153	6.02908	5.27234	5.60366	5.52458	6.73474	7.41552	7.31174
81	TC01003662.hg.1	ASPM	NM_001206846	RefSeq	Homo sapiens asp (abnormal spindle) homolog, microcephaly associated (Drosophila) (ASPM), transcript variant 2, mRNA.	FALSE	chr1	GO:0001764 // GO:0002052 // GO:0007067 // GO:0007283 // GO:0021873 // GO:0045665 // GO:0045769 // GO:0048477 // GO:0048589 // GO:0051661 // GO:0090263 // GO:0007049 // GO:0007420 // GO:0051301	neuron migration // positive regulation of neuroblast proliferation // mitotic nuclear division // spermatogenesis // forebrain neuroblast division // negative regulation of neuron differentiation // negative regulation of asymmetric cell division // oogenesis // developmental growth // maintenance of centrosome location // positive regulation of canonical Wnt signaling pathway // cell cycle // b…	GO:0000922 // GO:0005634 // GO:0005737 // GO:0030496 // GO:0005819 // GO:0005856	spindle pole // nucleus // cytoplasm // midbody // spindle // cytoskeleton	GO:0005516	calmodulin binding	---	---	chrNA:-1--1	TC01003662.hg.1	11.4132	11.786	11.6436	11.2845	10.9264	11.1466	12.1178	11.3747	11.3138	9.13912	10.122	10.3766	10.9957	10.8921	11.1256	7.66758	8.26341	8.43494
82	TC01003679.hg.1	KIF14	NM_014875	RefSeq	Homo sapiens kinesin family member 14 (KIF14), mRNA.	FALSE	chr1	GO:0007018 // GO:0008152 // GO:0030155 // GO:0030334 // GO:0032487 // GO:0033624 // GO:0034446 // GO:0045184	microtubule-based movement // metabolic process // regulation of cell adhesion // regulation of cell migration // regulation of Rap protein signal transduction // negative regulation of integrin activation // substrate adhesion-dependent cell spreading // establishment of protein localization	GO:0005634 // GO:0005737 // GO:0005819 // GO:0005871 // GO:0005874 // GO:0005856 // GO:0005874 // GO:0016020	nucleus // cytoplasm // spindle // kinesin complex // microtubule // cytoskeleton // microtubule // membrane	GO:0003777 // GO:0005515 // GO:0005524 // GO:0008017 // GO:0030165 // GO:0000166	microtubule motor activity // protein binding // ATP binding // microtubule binding // PDZ domain binding // nucleotide binding	---	---	chrNA:-1--1	TC01003679.hg.1	7.90996	8.12725	8.35552	7.96668	8.02125	8.34168	8.73829	8.25376	8.43675	7.1083	7.78297	7.79354	8.41999	8.25318	8.47933	5.90215	6.33666	6.42703
83	TC01003702.hg.1	UBE2T	NM_014176	RefSeq	Homo sapiens ubiquitin-conjugating enzyme E2T (putative) (UBE2T), mRNA.	FALSE	chr1	GO:0006281 // GO:0006281 // GO:0006513 // GO:0006974 // GO:0035519 // GO:0044314 // GO:0051865 // GO:0070534 // GO:0070936 // GO:0070979 // GO:0085020 // GO:0006281 // GO:0006974 // GO:0016567	DNA repair // DNA repair // protein monoubiquitination // cellular response to DNA damage stimulus // protein K29-linked ubiquitination // protein K27-linked ubiquitination // protein autoubiquitination // protein K63-linked ubiquitination // protein K48-linked ubiquitination // protein K11-linked ubiquitination // protein K6-linked ubiquitination // DNA repair // cellular response to DNA damage …	GO:0005634 // GO:0005654 // GO:0005634	nucleus // nucleoplasm // nucleus	GO:0003682 // GO:0004842 // GO:0005524 // GO:0016881 // GO:0031625 // GO:0000166 // GO:0016874	chromatin binding // ubiquitin-protein transferase activity // ATP binding // acid-amino acid ligase activity // ubiquitin protein ligase binding // nucleotide binding // ligase activity	---	---	chrNA:-1--1	TC01003702.hg.1	11.5204	12.1196	11.5747	11.3851	11.3442	11.4324	12.1616	11.8672	11.8323	11.7833	12.0587	12.1594	12.4543	12.3904	12.6193	9.31962	9.42369	9.59964
84	TC01003706.hg.1	KDM5B	NM_006618	RefSeq	Homo sapiens lysine (K)-specific demethylase 5B (KDM5B), mRNA.	FALSE	chr1	GO:0006351 // GO:0034720 // GO:0034721 // GO:0045892 // GO:0055114 // GO:0006355 // GO:0016568 // GO:0034720	transcription, DNA-templated // histone H3-K4 demethylation // histone H3-K4 demethylation, trimethyl-H3-K4-specific // negative regulation of transcription, DNA-templated // oxidation-reduction process // regulation of transcription, DNA-templated // chromatin modification // histone H3-K4 demethylation	GO:0005634 // GO:0005622 // GO:0005634	nucleus // intracellular // nucleus	GO:0003677 // GO:0003700 // GO:0003714 // GO:0005515 // GO:0008270 // GO:0016706 // GO:0034647 // GO:0034648 // GO:0003677 // GO:0016491 // GO:0032453 // GO:0046872 // GO:0051213	DNA binding // sequence-specific DNA binding transcription factor activity // transcription corepressor activity // protein binding // zinc ion binding // oxidoreductase activity, acting on paired donors, with incorporation or reduction of molecular oxygen, 2-oxoglutarate as one donor, and incorporation of one atom each of oxygen into both donors // histone demethylase activity (H3-trimethyl-K4 s…	---	---	chrNA:-1--1	TC01003706.hg.1	9.43861	9.69435	9.75011	8.75768	8.77565	8.79973	7.73152	7.61138	7.67836	7.70697	7.58125	7.90107	8.35585	8.38055	8.37763	9.37719	10.0123	10.1219
85	TC01003712.hg.1	CYB5R1	NM_016243	RefSeq	Homo sapiens cytochrome b5 reductase 1 (CYB5R1), mRNA.	FALSE	chr1	GO:0016126 // GO:0055114 // GO:0006629 // GO:0006694 // GO:0008150 // GO:0008202	sterol biosynthetic process // oxidation-reduction process // lipid metabolic process // steroid biosynthetic process // biological_process // steroid metabolic process	GO:0005739 // GO:0016021 // GO:0070062 // GO:0005739 // GO:0016020 // GO:0016020	mitochondrion // integral component of membrane // extracellular vesicular exosome // mitochondrion // membrane // membrane	GO:0004128 // GO:0003674 // GO:0016491	cytochrome-b5 reductase activity, acting on NAD(P)H // molecular_function // oxidoreductase activity	---	---	chrNA:-1--1	TC01003712.hg.1	6.25258	6.56344	6.27742	6.81341	6.75119	6.71345	7.0329	7.0991	7.32214	7.38362	7.35436	7.59835	6.90064	7.17647	6.97164	7.6202	8.11771	8.39314
86	TC01003730.hg.1	---	ENST00000441225	ENSEMBL	[retired] cdna:known chromosome:GRCh37:1:204336927:204346793:-1 gene:ENSG00000223673	FALSE	chr1	---	---	---	---	---	---	---	---	chrNA:-1--1	TC01003730.hg.1	8.83018	8.88021	9.31062	9.69432	9.53168	9.62217	7.3954	7.64428	7.12458	7.64498	7.57158	7.99325	8.92186	9.42336	9.07411	8.04259	7.1594	7.07813
87	TC01003733.hg.1	PIK3C2B	NM_002646	RefSeq	Homo sapiens phosphatidylinositol-4-phosphate 3-kinase, catalytic subunit type 2 beta (PIK3C2B), mRNA.	FALSE	chr1	GO:0006644 // GO:0006661 // GO:0036092 // GO:0043491 // GO:0044281 // GO:0046854 // GO:0048015 // GO:0008150 // GO:0016310 // GO:0036092	phospholipid metabolic process // phosphatidylinositol biosynthetic process // phosphatidylinositol-3-phosphate biosynthetic process // protein kinase B signaling // small molecule metabolic process // phosphatidylinositol phosphorylation // phosphatidylinositol-mediated signaling // biological_process // phosphorylation // phosphatidylinositol-3-phosphate biosynthetic process	GO:0005634 // GO:0005783 // GO:0005829 // GO:0005886 // GO:0005942 // GO:0030139 // GO:0005737 // GO:0005829 // GO:0005942 // GO:0016020 // GO:0043231	nucleus // endoplasmic reticulum // cytosol // plasma membrane // phosphatidylinositol 3-kinase complex // endocytic vesicle // cytoplasm // cytosol // phosphatidylinositol 3-kinase complex // membrane // intracellular membrane-bounded organelle	GO:0001727 // GO:0005515 // GO:0005524 // GO:0016303 // GO:0035005 // GO:0035091 // GO:0000166 // GO:0016301 // GO:0016303 // GO:0016740 // GO:0016772 // GO:0016773 // GO:0035005	lipid kinase activity // protein binding // ATP binding // 1-phosphatidylinositol-3-kinase activity // 1-phosphatidylinositol-4-phosphate 3-kinase activity // phosphatidylinositol binding // nucleotide binding // kinase activity // 1-phosphatidylinositol-3-kinase activity // transferase activity // transferase activity, transferring phosphorus-containing groups // phosphotransferase activity, alc…	GenMAPP	S1P_Signaling	chrNA:-1--1	TC01003733.hg.1	7.80619	8.21714	8.18592	6.75769	6.46751	6.60296	6.68237	6.50596	6.44964	6.4758	6.00205	6.48419	7.12143	7.18403	7.18986	7.66093	7.78376	7.98065
88	TC01003784.hg.1	LAMB3	NM_000228	RefSeq	Homo sapiens laminin, beta 3 (LAMB3), transcript variant 1, mRNA.	FALSE	chr1	GO:0007155 // GO:0008544 // GO:0022617 // GO:0030198 // GO:0031581 // GO:0034329 // GO:0050873	cell adhesion // epidermis development // extracellular matrix disassembly // extracellular matrix organization // hemidesmosome assembly // cell junction assembly // brown fat cell differentiation	GO:0005576 // GO:0005610 // GO:0005576 // GO:0005578 // GO:0005604	extracellular region // laminin-5 complex // extracellular region // proteinaceous extracellular matrix // basement membrane	GO:0005198 // GO:0005515 // GO:0032403	structural molecule activity // protein binding // protein complex binding	---	---	chrNA:-1--1	TC01003784.hg.1	8.86121	9.47982	9.54085	11.8543	11.7653	12.1624	5.73709	5.48994	6.06783	5.83427	5.66683	5.67981	9.58377	9.55416	9.63123	9.78979	10.5343	10.5894
89	TC01003798.hg.1	NEK2	NM_001204182	RefSeq	Homo sapiens NIMA-related kinase 2 (NEK2), transcript variant 3, mRNA.	FALSE	chr1	GO:0000070 // GO:0000086 // GO:0000278 // GO:0001824 // GO:0006468 // GO:0007059 // GO:0007067 // GO:0007088 // GO:0007126 // GO:0043392 // GO:0046602 // GO:0046777 // GO:0046777 // GO:0051225 // GO:0051299 // GO:0051988 // GO:0090307 // GO:0006468 // GO:0006468 // GO:0007049 // GO:0007059 // GO:0007067 // GO:0016310 // GO:0051301 // GO:1903126	mitotic sister chromatid segregation // G2/M transition of mitotic cell cycle // mitotic cell cycle // blastocyst development // protein phosphorylation // chromosome segregation // mitotic nuclear division // regulation of mitosis // meiotic nuclear division // negative regulation of DNA binding // regulation of mitotic centrosome separation // protein autophosphorylation // protein autophosphor…	GO:0000776 // GO:0000777 // GO:0000794 // GO:0000922 // GO:0005634 // GO:0005730 // GO:0005737 // GO:0005813 // GO:0005829 // GO:0005874 // GO:0030496 // GO:0043234 // GO:0045171 // GO:0000775 // GO:0000776 // GO:0005634 // GO:0005694 // GO:0005737 // GO:0005813 // GO:0005815 // GO:0005856	kinetochore // condensed chromosome kinetochore // condensed nuclear chromosome // spindle pole // nucleus // nucleolus // cytoplasm // centrosome // cytosol // microtubule // midbody // protein complex // intercellular bridge // chromosome, centromeric region // kinetochore // nucleus // chromosome // cytoplasm // centrosome // microtubule organizing center // cytoskeleton	GO:0004672 // GO:0004674 // GO:0005515 // GO:0005524 // GO:0019903 // GO:0046872 // GO:0000166 // GO:0004672 // GO:0004672 // GO:0004674 // GO:0016301 // GO:0016740 // GO:0016772	protein kinase activity // protein serine/threonine kinase activity // protein binding // ATP binding // protein phosphatase binding // metal ion binding // nucleotide binding // protein kinase activity // protein kinase activity // protein serine/threonine kinase activity // kinase activity // transferase activity // transferase activity, transferring phosphorus-containing groups	---	---	chrNA:-1--1	TC01003798.hg.1	7.54793	7.80617	7.34407	6.87311	6.71171	6.61405	8.06894	7.62379	7.28404	7.18368	7.30535	7.43245	7.64194	7.38354	7.65166	6.21744	6.43548	6.4399
90	TC01003801.hg.1	INTS7	NM_001199809	RefSeq	Homo sapiens integrator complex subunit 7 (INTS7), transcript variant 4, mRNA.	FALSE	chr1	GO:0000077 // GO:0016180 // GO:0071479 // GO:0006974	DNA damage checkpoint // snRNA processing // cellular response to ionizing radiation // cellular response to DNA damage stimulus	GO:0005694 // GO:0032039 // GO:0005634 // GO:0005694	chromosome // integrator complex // nucleus // chromosome	GO:0005515	protein binding	---	---	chrNA:-1--1	TC01003801.hg.1	8.62354	8.86882	8.81148	9.12089	9.25446	9.33402	9.33287	9.188	9.42514	9.18141	8.96298	9.38859	9.70363	9.67306	9.94225	8.657	8.74457	9.09058
91	TC01003847.hg.1	DUSP10	NM_007207	RefSeq	Homo sapiens dual specificity phosphatase 10 (DUSP10), transcript variant 1, mRNA.	FALSE	chr1	GO:0000188 // GO:0002819 // GO:0006470 // GO:0006950 // GO:0007254 // GO:0032496 // GO:0035335 // GO:0043508 // GO:0046329 // GO:0060266 // GO:0006470 // GO:0006470 // GO:0010033 // GO:0016311 // GO:0032873 // GO:0043508 // GO:0043508 // GO:0045088 // GO:0046329 // GO:0046329 // GO:0000188	inactivation of MAPK activity // regulation of adaptive immune response // protein dephosphorylation // response to stress // JNK cascade // response to lipopolysaccharide // peptidyl-tyrosine dephosphorylation // negative regulation of JUN kinase activity // negative regulation of JNK cascade // negative regulation of respiratory burst involved in inflammatory response // protein dephosphorylati…	GO:0005634 // GO:0005730 // GO:0005737 // GO:0005794 // GO:0005634 // GO:0005634 // GO:0005737	nucleus // nucleolus // cytoplasm // Golgi apparatus // nucleus // nucleus // cytoplasm	GO:0004721 // GO:0004725 // GO:0008138 // GO:0016791 // GO:0017017 // GO:0033549 // GO:0004721 // GO:0008138 // GO:0008138 // GO:0016787 // GO:0016791	phosphoprotein phosphatase activity // protein tyrosine phosphatase activity // protein tyrosine/serine/threonine phosphatase activity // phosphatase activity // MAP kinase tyrosine/serine/threonine phosphatase activity // MAP kinase phosphatase activity // phosphoprotein phosphatase activity // protein tyrosine/serine/threonine phosphatase activity // protein tyrosine/serine/threonine phosphatas…	---	---	chrNA:-1--1	TC01003847.hg.1	9.03503	9.50853	9.32792	9.41451	9.35166	9.48229	7.47987	7.18166	6.96252	9.49751	9.19879	9.44886	8.0902	7.77617	8.10106	9.46161	9.77336	9.94567
92	TC01003850.hg.1	RP11-815M8.1	OTTHUMT00000091109	Havana transcript	cdna:all chromosome:VEGA56:1:221880981:221918712:-1 Gene:OTTHUMG00000037423	FALSE	chr1	---	---	---	---	---	---	---	---	chrNA:-1--1	TC01003850.hg.1	6.58101	6.79785	6.70276	7.42879	7.2049	7.27154	4.99271	5.22927	4.80616	5.07599	4.56417	5.1194	6.08987	6.21212	5.99429	7.01631	6.70053	6.92055
93	TC01003876.hg.1	PARP1	NM_001618	RefSeq	Homo sapiens poly (ADP-ribose) polymerase 1 (PARP1), mRNA.	FALSE	chr1	GO:0000122 // GO:0000723 // GO:0006281 // GO:0006284 // GO:0006302 // GO:0006351 // GO:0006366 // GO:0006367 // GO:0006471 // GO:0007179 // GO:0010467 // GO:0016540 // GO:0023019 // GO:0030225 // GO:0032869 // GO:0040009 // GO:0042769 // GO:0045944 // GO:0060391 // GO:0070212 // GO:2000679 // GO:0006259 // GO:0006281 // GO:0006351 // GO:0006355 // GO:0006471 // GO:0006471 // GO:0006974 // GO:0007…	negative regulation of transcription from RNA polymerase II promoter // telomere maintenance // DNA repair // base-excision repair // double-strand break repair // transcription, DNA-templated // transcription from RNA polymerase II promoter // transcription initiation from RNA polymerase II promoter // protein ADP-ribosylation // transforming growth factor beta receptor signaling pathway // gene…	GO:0005634 // GO:0005635 // GO:0005654 // GO:0005667 // GO:0005730 // GO:0005634 // GO:0005634 // GO:0005654 // GO:0005730 // GO:0016020 // GO:0043234	nucleus // nuclear envelope // nucleoplasm // transcription factor complex // nucleolus // nucleus // nucleus // nucleoplasm // nucleolus // membrane // protein complex	GO:0003677 // GO:0003950 // GO:0003950 // GO:0005515 // GO:0008134 // GO:0008270 // GO:0019899 // GO:0042802 // GO:0044822 // GO:0047485 // GO:0051287 // GO:0070412 // GO:0003677 // GO:0003950 // GO:0016740 // GO:0016757 // GO:0019899 // GO:0046872	DNA binding // NAD+ ADP-ribosyltransferase activity // NAD+ ADP-ribosyltransferase activity // protein binding // transcription factor binding // zinc ion binding // enzyme binding // identical protein binding // poly(A) RNA binding // protein N-terminus binding // NAD binding // R-SMAD binding // DNA binding // NAD+ ADP-ribosyltransferase activity // transferase activity // transferase activity,…	GenMAPP	Apoptosis_GenMAPP	chrNA:-1--1	TC01003876.hg.1	8.21672	8.71677	8.60958	8.35708	8.2073	8.77059	9.3661	9.21235	9.13189	9.0214	9.20029	9.57778	9.7821	9.63603	9.60247	8.10361	8.40323	8.51181
94	TC01003897.hg.1	ACBD3	NM_022735	RefSeq	Homo sapiens acyl-CoA binding domain containing 3 (ACBD3), mRNA.	FALSE	chr1	GO:0006694 // GO:0006810 // GO:0006629	steroid biosynthetic process // transport // lipid metabolic process	GO:0000139 // GO:0005739 // GO:0005794 // GO:0016021 // GO:0005794 // GO:0016020 // GO:0016020	Golgi membrane // mitochondrion // Golgi apparatus // integral component of membrane // Golgi apparatus // membrane // membrane	GO:0000062 // GO:0005515	fatty-acyl-CoA binding // protein binding	---	---	chrNA:-1--1	TC01003897.hg.1	10.5397	10.3237	10.2631	10.855	11.0623	11.1308	11.0369	10.7955	10.7058	11.8149	12.1949	12.4196	11.1684	11.1143	11.3149	11.9596	12.5425	12.6391
95	TC01003996.hg.1	LYST	NM_000081	RefSeq	Homo sapiens lysosomal trafficking regulator (LYST), transcript variant 1, mRNA.	FALSE	chr1	GO:0002446 // GO:0002456 // GO:0006644 // GO:0007017 // GO:0007040 // GO:0007596 // GO:0030595 // GO:0032438 // GO:0032510 // GO:0032816 // GO:0033299 // GO:0033364 // GO:0042267 // GO:0042493 // GO:0042742 // GO:0042832 // GO:0043473 // GO:0051607 // GO:0055091 // GO:0006810 // GO:0015031 // GO:0030595 // GO:0032438 // GO:0033364 // GO:0042742 // GO:0042832 // GO:0043473 // GO:0048753 // GO:0051…	neutrophil mediated immunity // T cell mediated immunity // phospholipid metabolic process // microtubule-based process // lysosome organization // blood coagulation // leukocyte chemotaxis // melanosome organization // endosome to lysosome transport via multivesicular body sorting pathway // positive regulation of natural killer cell activation // secretion of lysosomal enzymes // mast cell secr…	GO:0005829 // GO:0015630 // GO:0005737	cytosol // microtubule cytoskeleton // cytoplasm	GO:0005515	protein binding	---	---	chrNA:-1--1	TC01003996.hg.1	7.6587	7.91991	7.62363	7.65503	7.46722	7.23583	7.08401	7.31572	7.33647	6.9718	7.48667	7.65524	7.137	7.05408	7.09327	7.97244	8.89226	8.74524
96	TC01004026.hg.1	OPN3	NM_014322	RefSeq	Homo sapiens opsin 3 (OPN3), mRNA.	FALSE	chr1	GO:0007186 // GO:0007602 // GO:0009583 // GO:0009584 // GO:0018298 // GO:0042752 // GO:0007165 // GO:0007186 // GO:0007602 // GO:0050896	G-protein coupled receptor signaling pathway // phototransduction // detection of light stimulus // detection of visible light // protein-chromophore linkage // regulation of circadian rhythm // signal transduction // G-protein coupled receptor signaling pathway // phototransduction // response to stimulus	GO:0005887 // GO:0016021 // GO:0016020 // GO:0016021	integral component of plasma membrane // integral component of membrane // membrane // integral component of membrane	GO:0004930 // GO:0008020 // GO:0009881 // GO:0004871 // GO:0004930 // GO:0009881	G-protein coupled receptor activity // G-protein coupled photoreceptor activity // photoreceptor activity // signal transducer activity // G-protein coupled receptor activity // photoreceptor activity	GenMAPP	GPCRDB_Class_A_Rhodopsin-like	chrNA:-1--1	TC01004026.hg.1	7.47405	7.75077	7.63981	6.65246	6.62333	6.66968	6.32444	6.22632	6.14965	6.1653	5.98938	6.38577	6.25688	6.1256	6.12654	6.24306	6.34799	6.48984
97	TC01004057.hg.1	---	ENST00000384596	ENSEMBL	ncrna:novel chromosome:GRCh38:1:246426006:246426119:-1 gene:ENSG00000207326 gene_biotype:misc_RNA transcript_biotype:misc_RNA	FALSE	chr1	---	---	---	---	---	---	---	---	chrNA:-1--1	TC01004057.hg.1	6.89331	6.75698	7.92075	7.59637	7.24306	7.28739	7.18631	5.96167	6.63765	5.62046	5.1181	5.80666	6.27052	6.84454	6.77443	4.94487	5.482	4.98068
98	TC01004108.hg.1	---	TCONS_00000122-XLOC_000004	Rinn lincRNA	linc-SAMD11-8 chr1:+:523008-530148	FALSE	chr1	---	---	---	---	---	---	---	---	chrNA:-1--1	TC01004108.hg.1	5.88706	5.48217	5.82892	5.55511	5.65807	5.27582	6.26092	5.73201	5.64677	5.51828	6.08155	5.99905	6.61728	6.76008	6.19793	7.02	7.50355	7.04597
99	TC01004184.hg.1	NPPA-AS1	NR_037806	NONCODE	accn=NR_037806 class=lncRNA name= ref=RefGeneNoncode transcriptId=NR_037806 cpcScore=-0.8047070 cnci=-0.2381011	FALSE	chr1	---	---	---	---	---	---	---	---	chrNA:-1--1	TC01004184.hg.1	6.9088	7.17483	6.88296	8.10478	8.30897	8.42295	7.69241	8.3803	8.65957	8.03306	7.74015	8.65592	6.73057	7.18164	6.90031	7.66842	8.02596	7.89185
100	TC01004199.hg.1	---	BC033316	NONCODE	accn=BC033316 class=mRNAlike lncRNA name=Human lncRNA ref=JounralRNA transcriptId=4713 cpcScore=-1.2468100 cnci=-0.2599198	FALSE	chr1	---	---	---	---	---	---	---	---	chrNA:-1--1	TC01004199.hg.1	5.61521	5.82557	5.80757	7.29878	7.83107	7.47271	5.62569	5.9512	5.89009	7.07609	6.63332	6.64969	5.60565	6.05694	5.92448	6.13582	6.31023	6.98467
101	TC01004258.hg.1	RP1-50O24.6	OTTHUMT00000012180	NONCODE	accn=NULL class=mRNAlike lncRNA name=vega lncRNA ref=GENCODE transcriptId=OTTHUMT00000012180 cpcScore=-0.7369500 cnci=-0.1139923 gene:OTTHUMG00000004228	FALSE	chr1	---	---	---	---	---	---	---	---	chrNA:-1--1	TC01004258.hg.1	6.61804	6.85241	6.99109	6.2735	6.72789	6.18288	6.81368	6.68927	6.58356	5.57228	5.72577	5.76529	6.30971	6.12268	6.18052	6.09458	6.18311	5.73993
102	TC01004342.hg.1	---	uc001chr.2	NONCODE	accn=NULL class=lncRNA name= ref=UCSCGeneNoncode transcriptId=uc001chr.2 cpcScore=-1.0738800 cnci=-0.2909232	FALSE	chr1	---	---	---	---	---	---	---	---	chrNA:-1--1	TC01004342.hg.1	5.29038	5.33537	5.24532	6.25516	6.14597	6.24955	4.83137	4.87318	4.92562	5.38514	4.91633	6.02493	4.77348	5.39623	4.98319	6.64325	5.54794	5.73405
103	TC01004350.hg.1	UROD	NR_036510	NONCODE	accn=NR_036510 class=lncRNA name= ref=RefGeneNoncode transcriptId=NR_036510 cpcScore=5.6063300 cnci=-0.1185565	FALSE	chr1	GO:0006778 // GO:0006782 // GO:0006783 // GO:0006783 // GO:0044281 // GO:0006779 // GO:0006783 // GO:0042168	porphyrin-containing compound metabolic process // protoporphyrinogen IX biosynthetic process // heme biosynthetic process // heme biosynthetic process // small molecule metabolic process // porphyrin-containing compound biosynthetic process // heme biosynthetic process // heme metabolic process	GO:0005829 // GO:0005737 // GO:0005829	cytosol // cytoplasm // cytosol	GO:0004853 // GO:0004853 // GO:0004853 // GO:0016829 // GO:0016831	uroporphyrinogen decarboxylase activity // uroporphyrinogen decarboxylase activity // uroporphyrinogen decarboxylase activity // lyase activity // carboxy-lyase activity	GenMAPP	Heme_Biosynthesis	chrNA:-1--1	TC01004350.hg.1	7.21884	7.7743	7.40976	7.38194	7.44947	7.64744	7.5326	7.58227	6.98982	8.37901	8.59714	8.79645	7.8197	7.41485	7.53152	8.15461	8.75557	8.89348
104	TC01004589.hg.1	NTNG1	AY764262	NONCODE	accn=AY764262 class=mRNAlike lncRNA name=NULL ref=H-invitational v7.5 transcriptId=HIT000257658 cpcScore=0.6608800 cnci=-0.1605465	FALSE	chr1	GO:0007409 // GO:0007275 // GO:0007399 // GO:0007409 // GO:0030154	axonogenesis // multicellular organismal development // nervous system development // axonogenesis // cell differentiation	GO:0046658 // GO:0005886 // GO:0016020 // GO:0031225 // GO:0046658	anchored component of plasma membrane // plasma membrane // membrane // anchored component of membrane // anchored component of plasma membrane	GO:0005515	protein binding	---	---	chrNA:-1--1	TC01004589.hg.1	4.56093	4.53718	4.44508	6.60704	6.54928	6.58451	3.88848	4.13105	3.84135	3.87021	4.06105	4.07572	4.02742	3.78189	3.89205	4.69753	3.84167	4.44308
105	TC01004639.hg.1	DCLRE1B	AF306690	NONCODE	accn=AF306690 class=mRNAlike lncRNA name=NULL ref=H-invitational v7.5 transcriptId=HIT000076878 cpcScore=-1.3916500 cnci=-0.3570146	FALSE	chr1	GO:0000075 // GO:0000723 // GO:0006281 // GO:0031627 // GO:0031848 // GO:0031860 // GO:0090305 // GO:0090305 // GO:0006974 // GO:0031627 // GO:0031848 // GO:0031860	cell cycle checkpoint // telomere maintenance // DNA repair // telomeric loop formation // protection from non-homologous end joining at telomere // telomeric 3' overhang formation // nucleic acid phosphodiester bond hydrolysis // nucleic acid phosphodiester bond hydrolysis // cellular response to DNA damage stimulus // telomeric loop formation // protection from non-homologous end joining at tel…	GO:0000781 // GO:0005634 // GO:0005737 // GO:0005813 // GO:0000781 // GO:0005694 // GO:0005815 // GO:0005856	chromosome, telomeric region // nucleus // cytoplasm // centrosome // chromosome, telomeric region // chromosome // microtubule organizing center // cytoskeleton	GO:0005515 // GO:0008409 // GO:0004518 // GO:0004527 // GO:0008409 // GO:0016787	protein binding // 5'-3' exonuclease activity // nuclease activity // exonuclease activity // 5'-3' exonuclease activity // hydrolase activity	---	---	chrNA:-1--1	TC01004639.hg.1	7.74369	8.25505	7.43058	8.04194	8.19558	8.17352	7.30082	7.35688	7.20863	7.10367	8.08435	8.15027	7.66934	7.60422	7.85802	6.11734	6.32585	6.42918
106	TC01004692.hg.1	---	uc001emi.3	NONCODE	accn=NULL class=lncRNA name= ref=UCSCGeneNoncode transcriptId=uc001emi.3 cpcScore=-0.2494520 cnci=-0.3161189	FALSE	chr1	---	---	---	---	---	---	---	---	chrNA:-1--1	TC01004692.hg.1	7.84604	8.43891	8.27623	8.65677	8.96468	8.72794	8.28857	8.41597	8.4883	9.71013	9.73347	9.7956	7.88924	7.88116	7.58735	8.05482	8.22292	8.08254
107	TC01004706.hg.1	---	TCONS_l2_00000568-XLOC_l2_000407	Broad TUCP	linc-NBPF15-5 chr1:+:147554487-147564821	FALSE	chr1	---	---	---	---	---	---	---	---	chrNA:-1--1	TC01004706.hg.1	5.93894	6.23312	6.10786	7.10856	7.34977	7.25812	6.38042	6.93939	7.08489	6.77651	6.63372	7.11194	5.35238	5.29965	5.50932	5.51503	5.22961	5.15547
108	TC01004715.hg.1	---	TCONS_00001141-XLOC_000390	Rinn lincRNA	linc-NBPF15-1 chr1:+:148556479-148558168	FALSE	chr1	---	---	---	---	---	---	---	---	chrNA:-1--1	TC01004715.hg.1	8.59898	9.39802	8.95392	10.9822	11.0004	11.0313	8.46931	8.69411	8.9773	9.27886	9.40047	9.81351	7.56648	7.74679	7.49912	7.79648	8.62152	8.27835
109	TC01004765.hg.1	MSTO2P	NR_024117	NONCODE	accn=NR_024117 class=lncRNA name= ref=RefGeneNoncode transcriptId=NR_024117 cpcScore=8.8285300 cnci=-0.1487206	FALSE	chr1	---	---	---	---	---	---	---	---	chrNA:-1--1	TC01004765.hg.1	7.96612	8.49263	8.14676	9.71147	9.67306	9.93436	9.59371	9.28958	9.48419	9.26534	9.49735	9.79976	9.03004	8.67309	8.74772	8.6646	8.95645	9.03538
110	TC01004801.hg.1	---	uc001gcd.2	NONCODE	accn=NULL class=lncRNA name= ref=UCSCGeneNoncode transcriptId=uc001gcd.2 cpcScore=-1.2947700 cnci=-0.3987245	FALSE	chr1	---	---	---	---	---	---	---	---	chrNA:-1--1	TC01004801.hg.1	6.0623	6.13085	6.40474	7.57794	7.54644	7.65182	7.36653	7.21885	7.44638	7.35644	8.03571	8.11641	8.41878	7.53118	7.93209	7.57631	8.45111	8.79147
111	TC01004808.hg.1	RP11-479J7.2	OTTHUMT00000096761	NONCODE	accn=NULL class=mRNAlike lncRNA name=vega lncRNA ref=GENCODE transcriptId=OTTHUMT00000096761 cpcScore=-1.3268800 cnci=-0.2839771 gene:OTTHUMG00000034556	FALSE	chr1	---	---	---	---	---	---	---	---	chrNA:-1--1	TC01004808.hg.1	7.05865	7.17826	7.50457	5.66652	5.5308	5.33512	5.51274	5.95491	6.34778	6.54244	6.34322	6.08762	6.32171	5.9175	6.16029	6.13023	6.43344	5.77463
112	TC01004837.hg.1	---	linc_luo_118	NONCODE	accn=NULL class=lincRNA name=Human lincRNA ref=Scripture Reconstruction LincRNAs By Luo transcriptId=linc_luo_118 cpcScore=-1.3811100 cnci=-0.2740984	FALSE	chr1	---	---	---	---	---	---	---	---	chrNA:-1--1	TC01004837.hg.1	7.5256	7.50149	7.42407	8.34257	8.71459	8.05016	5.86456	6.57279	6.03541	6.47633	7.80858	7.40446	7.13477	7.66427	6.9412	7.8793	9.26207	9.05162
113	TC01004870.hg.1	MR1	AK056155	NONCODE	accn=AK056155 class=mRNAlike lncRNA name=Human lncRNA ref=JounralRNA transcriptId=4826 cpcScore=-0.8113670 cnci=-0.2288388	FALSE	chr1	GO:0001916 // GO:0002367 // GO:0002474 // GO:0006955 // GO:0007165 // GO:0019882 // GO:0032611 // GO:0032620 // GO:0045087 // GO:0050829 // GO:0002376 // GO:0006955 // GO:0019882	positive regulation of T cell mediated cytotoxicity // cytokine production involved in immune response // antigen processing and presentation of peptide antigen via MHC class I // immune response // signal transduction // antigen processing and presentation // interleukin-1 beta production // interleukin-17 production // innate immune response // defense response to Gram-negative bacterium // imm…	GO:0005576 // GO:0005783 // GO:0005789 // GO:0005886 // GO:0016021 // GO:0042612 // GO:0005783 // GO:0005886 // GO:0016020	extracellular region // endoplasmic reticulum // endoplasmic reticulum membrane // plasma membrane // integral component of membrane // MHC class I protein complex // endoplasmic reticulum // plasma membrane // membrane	GO:0003823 // GO:0032393 // GO:0042605	antigen binding // MHC class I receptor activity // peptide antigen binding	---	---	chrNA:-1--1	TC01004870.hg.1	6.55103	7.16432	6.04284	6.76633	6.24341	6.65202	5.80955	5.63549	6.40993	6.87429	7.91857	8.04951	4.75146	4.87818	5.43635	5.95733	6.35509	6.3426
114	TC01005006.hg.1	LINC00467	AK130858	NONCODE	accn=AK130858 class=mRNAlike lncRNA name=Human lncRNA ref=JounralRNA transcriptId=909 cpcScore=-0.4203070 cnci=-0.1330351	FALSE	chr1	---	---	---	---	---	---	---	---	chrNA:-1--1	TC01005006.hg.1	6.08537	5.87244	6.00002	6.55942	6.75552	6.75243	6.10558	5.73229	5.959	6.64009	6.54289	6.79589	6.53982	6.38717	6.64428	7.0643	7.90166	7.68948
115	TC01005047.hg.1	---	TCONS_00000394-XLOC_000575	Rinn lincRNA	linc-MIA3-2 chr1:+:222139682-222156485	FALSE	chr1	---	---	---	---	---	---	---	---	chrNA:-1--1	TC01005047.hg.1	14.8559	15.0743	15.2141	15.2925	15.0571	14.9823	6.97677	7.53637	7.23556	6.71567	7.01075	7.48384	13.5958	13.5869	13.4004	14.8166	15.1171	15.1156
116	TC01005059.hg.1	RP11-396C23.2	OTTHUMT00000099052	NONCODE	accn=NULL class=mRNAlike lncRNA name=vega lncRNA ref=GENCODE transcriptId=OTTHUMT00000099052 cpcScore=-1.3304500 cnci=-0.5127372 gene:OTTHUMG00000041341	FALSE	chr1	---	---	---	---	---	---	---	---	chrNA:-1--1	TC01005059.hg.1	4.67737	4.83043	4.41356	6.14594	5.76457	5.95675	4.46687	4.63035	4.56111	4.17845	4.51039	4.48815	5.12963	4.03915	5.18773	4.65376	3.7351	4.345
117	TC01005067.hg.1	H3F3AP4	NR_002315	NONCODE	accn=NR_002315 class=lncRNA name= ref=RefGeneNoncode transcriptId=NR_002315 cpcScore=2.1412900 cnci=-0.2638222	FALSE	chr1	GO:0006334 // GO:0006336 // GO:0007420 // GO:0007596 // GO:0009725 // GO:0030307	nucleosome assembly // DNA replication-independent nucleosome assembly // brain development // blood coagulation // response to hormone // positive regulation of cell growth	GO:0000228 // GO:0000786 // GO:0000788 // GO:0005576 // GO:0005634 // GO:0005634 // GO:0005654 // GO:0005694 // GO:0043234 // GO:0070062	nuclear chromosome // nucleosome // nuclear nucleosome // extracellular region // nucleus // nucleus // nucleoplasm // chromosome // protein complex // extracellular vesicular exosome	GO:0000979 // GO:0000980 // GO:0003677 // GO:0005515 // GO:0031492 // GO:0046982	RNA polymerase II core promoter sequence-specific DNA binding // RNA polymerase II distal enhancer sequence-specific DNA binding // DNA binding // protein binding // nucleosomal DNA binding // protein heterodimerization activity	---	---	chrNA:-1--1	TC01005067.hg.1	14.5324	14.473	14.5045	13.2811	12.858	13.1927	15.0277	14.4592	14.3663	14.6053	13.9333	14.3611	15.114	15.0552	14.466	14.4437	14.1142	14.5162
118	TC01005330.hg.1	HMGCL	FJ472654	NONCODE	accn=FJ472654 class=mRNAlike lncRNA name=NULL ref=H-invitational v7.5 transcriptId=HIT000558624 cpcScore=2.2817600 cnci=-0.1398714	FALSE	chr1	GO:0001889 // GO:0006552 // GO:0006637 // GO:0007005 // GO:0007584 // GO:0009790 // GO:0042594 // GO:0044255 // GO:0044281 // GO:0046950 // GO:0046951 // GO:0046951 // GO:0051262 // GO:0070542 // GO:0046951 // GO:0008152	liver development // leucine catabolic process // acyl-CoA metabolic process // mitochondrion organization // response to nutrient // embryo development // response to starvation // cellular lipid metabolic process // small molecule metabolic process // cellular ketone body metabolic process // ketone body biosynthetic process // ketone body biosynthetic process // protein tetramerization // resp…	GO:0005739 // GO:0005743 // GO:0005759 // GO:0005759 // GO:0005777 // GO:0005739 // GO:0005759 // GO:0005777	mitochondrion // mitochondrial inner membrane // mitochondrial matrix // mitochondrial matrix // peroxisome // mitochondrion // mitochondrial matrix // peroxisome	GO:0000062 // GO:0000287 // GO:0004419 // GO:0004419 // GO:0005102 // GO:0030145 // GO:0031406 // GO:0042803 // GO:0046872 // GO:0003824 // GO:0004419 // GO:0016829 // GO:0046872	fatty-acyl-CoA binding // magnesium ion binding // hydroxymethylglutaryl-CoA lyase activity // hydroxymethylglutaryl-CoA lyase activity // receptor binding // manganese ion binding // carboxylic acid binding // protein homodimerization activity // metal ion binding // catalytic activity // hydroxymethylglutaryl-CoA lyase activity // lyase activity // metal ion binding	GenMAPP	Synthesis_and_Degradation_of_Keton_Bodies_KEGG	chrNA:-1--1	TC01005330.hg.1	6.76213	6.8687	6.63038	6.78658	7.40086	7.31389	6.48444	6.53127	6.89482	8.27721	8.95627	9.55738	6.45012	6.62747	6.1525	7.64389	8.24467	8.01341
119	TC01005350.hg.1	STMN1	AB451448	NONCODE	accn=AB451448 class=mRNAlike lncRNA name=NULL ref=H-invitational v7.5 transcriptId=HIT000487661 cpcScore=2.1486700 cnci=-0.1532000	FALSE	chr1	GO:0007019 // GO:0007052 // GO:0007165 // GO:0007409 // GO:0009615 // GO:0031115 // GO:0035556 // GO:0051272 // GO:0031110 // GO:0007275 // GO:0007399 // GO:0030154	microtubule depolymerization // mitotic spindle organization // signal transduction // axonogenesis // response to virus // negative regulation of microtubule polymerization // intracellular signal transduction // positive regulation of cellular component movement // regulation of microtubule polymerization or depolymerization // multicellular organismal development // nervous system development …	GO:0005622 // GO:0005829 // GO:0005874 // GO:0016020 // GO:0070062 // GO:0005737 // GO:0005856	intracellular // cytosol // microtubule // membrane // extracellular vesicular exosome // cytoplasm // cytoskeleton	GO:0004871 // GO:0015631	signal transducer activity // tubulin binding	---	---	chrNA:-1--1	TC01005350.hg.1	15.1405	15.3093	15.1115	13.9144	13.6795	13.9123	15.8907	15.8181	15.7965	15.7116	15.8356	15.9349	14.4395	14.0105	14.2262	10.4695	10.6091	10.8473
120	TC01005497.hg.1	NDC1	NR_033142	NONCODE	accn=NR_033142 class=lncRNA name= ref=RefGeneNoncode transcriptId=NR_033142 cpcScore=12.0099000 cnci=-0.3793834	FALSE	chr1	GO:0015031 // GO:0031081 // GO:0051028 // GO:0051292 // GO:0006810 // GO:0015031	protein transport // nuclear pore distribution // mRNA transport // nuclear pore complex assembly // transport // protein transport	GO:0005643 // GO:0031965 // GO:0005634 // GO:0005643 // GO:0016020 // GO:0016020 // GO:0016021	nuclear pore // nuclear membrane // nucleus // nuclear pore // membrane // membrane // integral component of membrane	GO:0017056	structural constituent of nuclear pore	---	---	chrNA:-1--1	TC01005497.hg.1	13.2527	12.8794	12.6345	12.5629	12.4927	12.3746	12.7562	13.3645	13.3534	12.1232	12.262	12.3971	12.4705	12.6023	12.7824	10.3834	10.5767	10.5645
121	TC01005634.hg.1	---	CR609342	NONCODE	accn=CR609342 class=mRNAlike lncRNA name=Human lncRNA ref=JounralRNA transcriptId=475 cpcScore=-1.0883100 cnci=-0.2608609	FALSE	chr1	---	---	---	---	---	---	---	---	chrNA:-1--1	TC01005634.hg.1	6.41763	6.59802	6.56653	6.7463	6.66255	6.7224	5.93536	6.31511	6.02483	6.40938	6.63637	6.77652	6.45048	6.50198	6.42038	7.50423	7.87961	7.58667
122	TC01005765.hg.1	---	linc_luo_1230	NONCODE	accn=NULL class=lincRNA name=Human lincRNA ref=Scripture Reconstruction LincRNAs By Luo transcriptId=linc_luo_1230 cpcScore=-1.3455100 cnci=-0.1626233	FALSE	chr1	---	---	---	---	---	---	---	---	chrNA:-1--1	TC01005765.hg.1	6.88318	8.30098	7.9802	8.69119	8.79659	8.52223	7.81196	7.97601	7.99519	6.73357	7.73525	7.47511	9.06983	9.2253	8.86027	6.99671	6.47101	6.60737
123	TC01005850.hg.1	---	AK056250	NONCODE	accn=AK056250 class=mRNAlike lncRNA name=Human lncRNA ref=JounralRNA transcriptId=4807 cpcScore=-0.7384380 cnci=-0.2052721	FALSE	chr1	---	---	---	---	---	---	---	---	chrNA:-1--1	TC01005850.hg.1	5.85656	6.35622	6.1193	6.12952	6.18224	6.2759	6.34231	6.08926	6.28137	9.33085	8.44998	8.91145	5.31464	5.70319	5.32747	6.20481	5.92674	6.09982
124	TC01005883.hg.1	TAGLN2	AJ844624	NONCODE	accn=AJ844624 class=mRNAlike lncRNA name=NULL ref=H-invitational v7.5 transcriptId=HIT000249428 cpcScore=-0.8923710 cnci=-0.0737822	FALSE	chr1	GO:0030855	epithelial cell differentiation	GO:0070062	extracellular vesicular exosome	GO:0005515	protein binding	---	---	chrNA:-1--1	TC01005883.hg.1	14.344	14.6661	14.3858	13.0278	13.1107	13.331	13.9701	13.5621	12.5131	13.0359	12.8612	13.0897	16.1068	16.0589	15.8794	15.4729	15.7354	15.8056
125	TC01005963.hg.1	---	AK123435	NONCODE	accn=AK123435 class=mRNAlike lncRNA name=Human lncRNA ref=JounralRNA transcriptId=787 cpcScore=-1.1443300 cnci=-0.3730624	FALSE	chr1	---	---	---	---	---	---	---	---	chrNA:-1--1	TC01005963.hg.1	8.45295	8.16592	8.14135	9.54587	9.56071	9.5785	8.46397	8.36422	7.99267	8.21721	8.55123	8.71514	5.89957	5.89096	6.3202	6.73576	6.8933	7.78599
126	TC01006023.hg.1	ASPM	BC015396	NONCODE	accn=BC015396 class=mRNAlike lncRNA name=NULL ref=H-invitational v7.5 transcriptId=HIT000088656 cpcScore=1.2375100 cnci=-0.1845978	FALSE	chr1	GO:0001764 // GO:0002052 // GO:0007067 // GO:0007283 // GO:0021873 // GO:0045665 // GO:0045769 // GO:0048477 // GO:0048589 // GO:0051661 // GO:0090263 // GO:0007049 // GO:0007420 // GO:0051301	neuron migration // positive regulation of neuroblast proliferation // mitotic nuclear division // spermatogenesis // forebrain neuroblast division // negative regulation of neuron differentiation // negative regulation of asymmetric cell division // oogenesis // developmental growth // maintenance of centrosome location // positive regulation of canonical Wnt signaling pathway // cell cycle // b…	GO:0000922 // GO:0005634 // GO:0005737 // GO:0030496 // GO:0005819 // GO:0005856	spindle pole // nucleus // cytoplasm // midbody // spindle // cytoskeleton	GO:0005516	calmodulin binding	---	---	chrNA:-1--1	TC01006023.hg.1	14.2623	14.5167	14.8934	14.6008	14.2385	14.6602	15.3468	14.7671	14.7219	12.366	12.9655	13.7612	14.1552	13.8819	14.1602	10.2801	11.517	10.9773
127	TC01006061.hg.1	RAB29	CR542010	NONCODE	accn=CR542010 class=mRNAlike lncRNA name=Human lncRNA ref=JounralRNA transcriptId=887 cpcScore=3.0450500 cnci=-0.0561921	FALSE	chr1	GO:0006184 // GO:0006888 // GO:0007030 // GO:0007264 // GO:0015031 // GO:0035526 // GO:0090316 // GO:0006810	GTP catabolic process // ER to Golgi vesicle-mediated transport // Golgi organization // small GTPase mediated signal transduction // protein transport // retrograde transport, plasma membrane to Golgi // positive regulation of intracellular protein transport // transport	GO:0005737 // GO:0005802 // GO:0005886 // GO:0070062 // GO:0016020	cytoplasm // trans-Golgi network // plasma membrane // extracellular vesicular exosome // membrane	GO:0003924 // GO:0005525 // GO:0000166	GTPase activity // GTP binding // nucleotide binding	---	---	chrNA:-1--1	TC01006061.hg.1	6.64034	7.11412	6.55645	6.33376	6.85965	6.64985	7.50138	7.61057	7.77947	9.06391	9.15964	9.53318	6.64631	6.33666	6.21605	5.80965	6.88376	7.38971
128	TC01006063.hg.1	RP11-328D5.1	OTTHUMT00000088900	NONCODE	accn=NULL class=mRNAlike lncRNA name=vega lncRNA ref=GENCODE transcriptId=OTTHUMT00000088900 cpcScore=-1.1749400 cnci=-0.3175934 gene:OTTHUMG00000036552	FALSE	chr1	---	---	---	---	---	---	---	---	chrNA:-1--1	TC01006063.hg.1	11.5858	11.8596	12.3128	11.5767	11.5232	11.3954	11.0237	10.8955	11.0374	9.02786	9.28634	9.31953	9.41125	10.1131	9.96589	7.81914	8.1606	8.61764
129	TC01006091.hg.1	NEK2	Z25425	NONCODE	accn=Z25425 class=mRNAlike lncRNA name=NULL ref=H-invitational v7.5 transcriptId=HIT000326706 cpcScore=0.8403380 cnci=-0.3277792	FALSE	chr1	GO:0000070 // GO:0000086 // GO:0000278 // GO:0001824 // GO:0006468 // GO:0007059 // GO:0007067 // GO:0007088 // GO:0007126 // GO:0043392 // GO:0046602 // GO:0046777 // GO:0046777 // GO:0051225 // GO:0051299 // GO:0051988 // GO:0090307 // GO:0006468 // GO:0006468 // GO:0007049 // GO:0007059 // GO:0007067 // GO:0016310 // GO:0051301 // GO:1903126	mitotic sister chromatid segregation // G2/M transition of mitotic cell cycle // mitotic cell cycle // blastocyst development // protein phosphorylation // chromosome segregation // mitotic nuclear division // regulation of mitosis // meiotic nuclear division // negative regulation of DNA binding // regulation of mitotic centrosome separation // protein autophosphorylation // protein autophosphor…	GO:0000776 // GO:0000777 // GO:0000794 // GO:0000922 // GO:0005634 // GO:0005730 // GO:0005737 // GO:0005813 // GO:0005829 // GO:0005874 // GO:0030496 // GO:0043234 // GO:0045171 // GO:0000775 // GO:0000776 // GO:0005634 // GO:0005694 // GO:0005737 // GO:0005813 // GO:0005815 // GO:0005856	kinetochore // condensed chromosome kinetochore // condensed nuclear chromosome // spindle pole // nucleus // nucleolus // cytoplasm // centrosome // cytosol // microtubule // midbody // protein complex // intercellular bridge // chromosome, centromeric region // kinetochore // nucleus // chromosome // cytoplasm // centrosome // microtubule organizing center // cytoskeleton	GO:0004672 // GO:0004674 // GO:0005515 // GO:0005524 // GO:0019903 // GO:0046872 // GO:0000166 // GO:0004672 // GO:0004672 // GO:0004674 // GO:0016301 // GO:0016740 // GO:0016772	protein kinase activity // protein serine/threonine kinase activity // protein binding // ATP binding // protein phosphatase binding // metal ion binding // nucleotide binding // protein kinase activity // protein kinase activity // protein serine/threonine kinase activity // kinase activity // transferase activity // transferase activity, transferring phosphorus-containing groups	---	---	chrNA:-1--1	TC01006091.hg.1	8.2179	8.29302	7.53489	6.89078	6.6694	7.08885	8.84631	8.26939	8.03768	8.22797	8.4739	7.93425	8.33552	8.18647	7.99269	5.65299	6.80319	6.73112
130	TC01006094.hg.1	INTS7	NR_037667	NONCODE	accn=NR_037667 class=lncRNA name= ref=RefGeneNoncode transcriptId=NR_037667 cpcScore=10.9502000 cnci=-0.3400868	FALSE	chr1	GO:0000077 // GO:0016180 // GO:0071479 // GO:0006974	DNA damage checkpoint // snRNA processing // cellular response to ionizing radiation // cellular response to DNA damage stimulus	GO:0005694 // GO:0032039 // GO:0005634 // GO:0005694	chromosome // integrator complex // nucleus // chromosome	GO:0005515	protein binding	---	---	chrNA:-1--1	TC01006094.hg.1	8.67886	9.06934	8.83607	9.16752	9.29116	9.40555	9.4218	9.31041	9.63489	9.28567	9.03605	9.58657	9.98289	9.87984	10.0784	8.44154	8.74612	9.21988
131	TC01006291.hg.1	CFH	NM_000186	RefSeq	Homo sapiens complement factor H (CFH), transcript variant 1, mRNA.	FALSE	chr1	GO:0006956 // GO:0006957 // GO:0030449 // GO:0045087 // GO:0002376 // GO:0045087	complement activation // complement activation, alternative pathway // regulation of complement activation // innate immune response // immune system process // innate immune response	GO:0005576 // GO:0005615 // GO:0072562 // GO:0005576	extracellular region // extracellular space // blood microparticle // extracellular region	GO:0005515 // GO:0008201 // GO:0043395	protein binding // heparin binding // heparan sulfate proteoglycan binding	---	---	chrNA:-1--1	TC01006291.hg.1	7.41218	7.62648	7.31304	5.57965	5.63651	5.32274	5.92859	6.66362	6.8903	6.20831	6.78883	6.91574	7.76293	7.52356	8.10356	6.90882	7.85059	7.40226
132	TC01006300.hg.1	STIL	NM_001048166	RefSeq	Homo sapiens SCL/TAL1 interrupting locus (STIL), transcript variant 1, mRNA.	FALSE	chr1	GO:0000578 // GO:0001701 // GO:0001843 // GO:0001947 // GO:0007224 // GO:0007368 // GO:0008283 // GO:0021915 // GO:0030900 // GO:0030903 // GO:0033504 // GO:0035264 // GO:0043066 // GO:0000578 // GO:0001701 // GO:0001843 // GO:0001947 // GO:0007224 // GO:0007275 // GO:0007368 // GO:0021915 // GO:0030900 // GO:0030903 // GO:0033504 // GO:0035264 // GO:0043066	embryonic axis specification // in utero embryonic development // neural tube closure // heart looping // smoothened signaling pathway // determination of left/right symmetry // cell proliferation // neural tube development // forebrain development // notochord development // floor plate development // multicellular organism growth // negative regulation of apoptotic process // embryonic axis spe…	GO:0005813 // GO:0005829 // GO:0005737	centrosome // cytosol // cytoplasm	GO:0005515	protein binding	---	---	chrNA:-1--1	TC01006300.hg.1	9.38487	9.17203	9.38415	9.26736	9.25516	9.36715	9.7508	9.59224	9.75311	8.81418	8.28892	9.00702	9.39069	9.06126	9.28783	6.31675	6.63673	6.51064
133	TC01006326.hg.1	HIST2H2AC	NM_003517	RefSeq	Homo sapiens histone cluster 2, H2ac (HIST2H2AC), mRNA.	FALSE	chr1	GO:0006334 // GO:0008150	nucleosome assembly // biological_process	GO:0000786 // GO:0005634 // GO:0070062 // GO:0005634 // GO:0005694	nucleosome // nucleus // extracellular vesicular exosome // nucleus // chromosome	GO:0003677 // GO:0046982 // GO:0003674	DNA binding // protein heterodimerization activity // molecular_function	---	---	chrNA:-1--1	TC01006326.hg.1	13.596	13.6351	13.5391	12.7915	12.4545	13.9047	15.7079	15.491	14.9247	15.4525	14.6015	15.4883	15.4936	14.7126	14.4918	11.4143	10.6945	11.2792
134	TC01006334.hg.1	MSTO1	NM_018116	RefSeq	Homo sapiens misato 1, mitochondrial distribution and morphology regulator (MSTO1), transcript variant 1, mRNA.	FALSE	chr1	GO:0007005 // GO:0048311	mitochondrion organization // mitochondrion distribution	GO:0005737 // GO:0005741 // GO:0005739 // GO:0005741 // GO:0016020	cytoplasm // mitochondrial outer membrane // mitochondrion // mitochondrial outer membrane // membrane	GO:0003674	molecular_function	---	---	chrNA:-1--1	TC01006334.hg.1	7.0738	7.42857	7.3244	8.47259	8.45663	8.59742	8.28465	8.05333	8.06649	8.13554	8.18733	8.5889	7.86973	7.76967	7.68558	7.59569	7.94216	7.79232
135	TC02000057.hg.1	RRM2	NM_001034	RefSeq	Homo sapiens ribonucleotide reductase M2 (RRM2), transcript variant 2, mRNA.	FALSE	chr2	GO:0000082 // GO:0000083 // GO:0000278 // GO:0006260 // GO:0009186 // GO:0009263 // GO:0015949 // GO:0044281 // GO:0051290 // GO:0055086 // GO:0055114 // GO:0009262 // GO:0009263 // GO:0051259	G1/S transition of mitotic cell cycle // regulation of transcription involved in G1/S transition of mitotic cell cycle // mitotic cell cycle // DNA replication // deoxyribonucleoside diphosphate metabolic process // deoxyribonucleotide biosynthetic process // nucleobase-containing small molecule interconversion // small molecule metabolic process // protein heterotetramerization // nucleobase-con…	GO:0005634 // GO:0005654 // GO:0005737 // GO:0005829 // GO:0005737	nucleus // nucleoplasm // cytoplasm // cytosol // cytoplasm	GO:0004748 // GO:0004748 // GO:0005515 // GO:0046872 // GO:0004748 // GO:0016491	ribonucleoside-diphosphate reductase activity, thioredoxin disulfide as acceptor // ribonucleoside-diphosphate reductase activity, thioredoxin disulfide as acceptor // protein binding // metal ion binding // ribonucleoside-diphosphate reductase activity, thioredoxin disulfide as acceptor // oxidoreductase activity	HumanCyc // HumanCyc // HumanCyc	PWY-6125 // PWY-6126 // PWY0-166	chrNA:-1--1	TC02000057.hg.1	7.78896	7.72453	7.73231	7.65487	7.85886	7.68416	7.93666	7.75096	7.85247	7.34722	7.35667	7.63078	7.9585	7.89855	7.90119	6.14364	5.84452	6.13373
136	TC02000078.hg.1	LPIN1	NM_145693	RefSeq	Homo sapiens lipin 1 (LPIN1), transcript variant 1, mRNA.	FALSE	chr2	GO:0006351 // GO:0006357 // GO:0006642 // GO:0006644 // GO:0006646 // GO:0006656 // GO:0009062 // GO:0016311 // GO:0019432 // GO:0044255 // GO:0044281 // GO:0046474 // GO:0006355 // GO:0006629 // GO:0006631 // GO:0009062 // GO:0019432	transcription, DNA-templated // regulation of transcription from RNA polymerase II promoter // triglyceride mobilization // phospholipid metabolic process // phosphatidylethanolamine biosynthetic process // phosphatidylcholine biosynthetic process // fatty acid catabolic process // dephosphorylation // triglyceride biosynthetic process // cellular lipid metabolic process // small molecule metabol…	GO:0005634 // GO:0005737 // GO:0005789 // GO:0005829 // GO:0031965 // GO:0005634 // GO:0005737 // GO:0005783 // GO:0005789 // GO:0016020 // GO:0031965	nucleus // cytoplasm // endoplasmic reticulum membrane // cytosol // nuclear membrane // nucleus // cytoplasm // endoplasmic reticulum // endoplasmic reticulum membrane // membrane // nuclear membrane	GO:0008195 // GO:0003674 // GO:0016787	phosphatidate phosphatase activity // molecular_function // hydrolase activity	---	---	chrNA:-1--1	TC02000078.hg.1	6.60402	6.67971	6.64037	7.34039	7.39251	7.47905	7.33591	7.9213	8.0759	7.33487	7.20871	7.52212	6.73638	6.63494	6.73615	7.46159	7.63433	7.67071
137	TC02000104.hg.1	VSNL1	NM_003385	RefSeq	Homo sapiens visinin-like 1 (VSNL1), mRNA.	FALSE	chr2	---	---	---	---	GO:0005509 // GO:0046872	calcium ion binding // metal ion binding	---	---	chrNA:-1--1	TC02000104.hg.1	6.85709	7.00637	6.62452	5.63668	5.69713	5.74323	4.98514	5.10415	5.07761	4.91478	5.01277	5.13069	5.9613	5.93388	5.92659	5.90678	5.60527	5.67779
138	TC02000139.hg.1	CENPO	NM_001199803	RefSeq	Homo sapiens centromere protein O (CENPO), transcript variant 2, mRNA.	FALSE	chr2	GO:0000278 // GO:0006334 // GO:0034080 // GO:0034508	mitotic cell cycle // nucleosome assembly // centromere-specific nucleosome assembly // centromere complex assembly	GO:0000777 // GO:0005634 // GO:0005654 // GO:0005730 // GO:0005829 // GO:0000775 // GO:0000776 // GO:0005634 // GO:0005694	condensed chromosome kinetochore // nucleus // nucleoplasm // nucleolus // cytosol // chromosome, centromeric region // kinetochore // nucleus // chromosome	---	---	GenMAPP // GenMAPP // GenMAPP	G_Protein_Signaling // Calcium_regulation_in_cardiac_cells // Smooth_muscle_contraction	chrNA:-1--1	TC02000139.hg.1	9.58935	9.84959	9.52067	10.0014	10.2846	10.1739	9.55386	9.23948	9.31503	8.89706	8.83363	9.39537	9.72106	9.78525	9.76731	7.48819	7.94275	8.15601
139	TC02000197.hg.1	YPEL5	NM_001127399	RefSeq	Homo sapiens yippee-like 5 (Drosophila) (YPEL5), transcript variant 3, mRNA.	FALSE	chr2	---	---	---	---	---	---	---	---	chrNA:-1--1	TC02000197.hg.1	7.46342	7.66478	7.35193	7.26692	7.13252	7.07546	6.84671	7.1823	7.32184	7.27338	7.45264	7.54754	6.76106	6.65496	6.948	7.79671	8.48154	8.48011
140	TC02000219.hg.1	LTBP1	NM_000627	RefSeq	Homo sapiens latent transforming growth factor beta binding protein 1 (LTBP1), transcript variant 2, mRNA.	FALSE	chr2	GO:0007178 // GO:0030198 // GO:0035583	transmembrane receptor protein serine/threonine kinase signaling pathway // extracellular matrix organization // sequestering of TGFbeta in extracellular matrix	GO:0005576 // GO:0005578 // GO:0031012 // GO:0005576 // GO:0005578	extracellular region // proteinaceous extracellular matrix // extracellular matrix // extracellular region // proteinaceous extracellular matrix	GO:0005024 // GO:0005509 // GO:0005515 // GO:0050431 // GO:0019838	transforming growth factor beta-activated receptor activity // calcium ion binding // protein binding // transforming growth factor beta binding // growth factor binding	GenMAPP	TGF_Beta_Signaling_Pathway	chrNA:-1--1	TC02000219.hg.1	6.88368	7.32739	7.0677	5.65769	5.47095	5.37472	5.1764	5.16085	4.99372	5.65538	5.90795	6.12746	5.79158	5.87907	6.06692	5.66635	5.46204	5.45695
141	TC02000260.hg.1	EML4	NM_001145076	RefSeq	Homo sapiens echinoderm microtubule associated protein like 4 (EML4), transcript variant 2, mRNA.	FALSE	chr2	GO:0007017 // GO:0007026 // GO:0007067	microtubule-based process // negative regulation of microtubule depolymerization // mitotic nuclear division	GO:0005737 // GO:0005874 // GO:0072686 // GO:0005737 // GO:0005856 // GO:0016020	cytoplasm // microtubule // mitotic spindle // cytoplasm // cytoskeleton // membrane	GO:0003674	molecular_function	---	---	chrNA:-1--1	TC02000260.hg.1	9.15922	9.21405	9.34327	8.91476	8.95577	9.07175	10.2995	10.1519	10.3966	8.79765	8.7439	8.89354	9.86294	10.0729	9.85174	9.49326	9.51788	9.6901
142	TC02000295.hg.1	MSH2	NM_000251	RefSeq	Homo sapiens mutS homolog 2 (MSH2), transcript variant 1, mRNA.	FALSE	chr2	GO:0000710 // GO:0001701 // GO:0006119 // GO:0006200 // GO:0006200 // GO:0006200 // GO:0006281 // GO:0006298 // GO:0006298 // GO:0006301 // GO:0006302 // GO:0006311 // GO:0007050 // GO:0007281 // GO:0008340 // GO:0008584 // GO:0010165 // GO:0010165 // GO:0010224 // GO:0010224 // GO:0016446 // GO:0016447 // GO:0019724 // GO:0030183 // GO:0031573 // GO:0042771 // GO:0043524 // GO:0043570 // GO:0045…	meiotic mismatch repair // in utero embryonic development // oxidative phosphorylation // ATP catabolic process // ATP catabolic process // ATP catabolic process // DNA repair // mismatch repair // mismatch repair // postreplication repair // double-strand break repair // meiotic gene conversion // cell cycle arrest // germ cell development // determination of adult lifespan // male gonad develop…	GO:0000228 // GO:0032301 // GO:0032302 // GO:0000228 // GO:0005634 // GO:0016020 // GO:0032301 // GO:0032302	nuclear chromosome // MutSalpha complex // MutSbeta complex // nuclear chromosome // nucleus // membrane // MutSalpha complex // MutSbeta complex	GO:0000287 // GO:0000400 // GO:0000403 // GO:0000404 // GO:0000406 // GO:0003677 // GO:0003690 // GO:0003697 // GO:0005515 // GO:0005524 // GO:0008022 // GO:0008094 // GO:0016887 // GO:0019237 // GO:0019899 // GO:0019901 // GO:0030983 // GO:0032137 // GO:0032137 // GO:0032139 // GO:0032142 // GO:0032143 // GO:0032181 // GO:0032357 // GO:0032405 // GO:0042803 // GO:0043531 // GO:0000166 // GO:0000…	magnesium ion binding // four-way junction DNA binding // Y-form DNA binding // heteroduplex DNA loop binding // double-strand/single-strand DNA junction binding // DNA binding // double-stranded DNA binding // single-stranded DNA binding // protein binding // ATP binding // protein C-terminus binding // DNA-dependent ATPase activity // ATPase activity // centromeric DNA binding // enzyme binding…	---	---	chrNA:-1--1	TC02000295.hg.1	8.83382	9.05811	8.99038	8.84131	8.76296	8.91291	8.81649	8.86654	8.75361	8.61228	8.8703	9.11164	9.28495	9.07797	9.31637	7.66459	7.74987	7.83043
143	TC02000310.hg.1	CHAC2	NM_001008708	RefSeq	Homo sapiens ChaC, cation transport regulator homolog 2 (E. coli) (CHAC2), mRNA.	FALSE	chr2	GO:0008150	biological_process	GO:0005575	cellular_component	GO:0003674	molecular_function	---	---	chrNA:-1--1	TC02000310.hg.1	7.07186	7.17729	6.80672	7.03677	7.10511	7.32067	6.35112	6.4732	6.13762	5.93	5.77102	6.12186	8.87048	8.48028	9.33053	7.29731	6.97309	7.35506
144	TC02000374.hg.1	SLC1A4	NM_001193493	RefSeq	Homo sapiens solute carrier family 1 (glutamate/neutral amino acid transporter), member 4 (SLC1A4), transcript variant 2, mRNA.	FALSE	chr2	GO:0006811 // GO:0006821 // GO:0006835 // GO:0006865 // GO:0006868 // GO:0015808 // GO:0015811 // GO:0015824 // GO:0015825 // GO:0015826 // GO:0034589 // GO:0035249 // GO:0035524 // GO:0050890 // GO:0055085 // GO:1902476 // GO:0006810 // GO:0015825	ion transport // chloride transport // dicarboxylic acid transport // amino acid transport // glutamine transport // L-alanine transport // L-cystine transport // proline transport // L-serine transport // threonine transport // hydroxyproline transport // synaptic transmission, glutamatergic // proline transmembrane transport // cognition // transmembrane transport // chloride transmembrane tran…	GO:0005813 // GO:0005815 // GO:0005882 // GO:0005886 // GO:0005887 // GO:0016021 // GO:0030425 // GO:0042470 // GO:0043025 // GO:0070062 // GO:0005882 // GO:0016020 // GO:0016020 // GO:0016021	centrosome // microtubule organizing center // intermediate filament // plasma membrane // integral component of plasma membrane // integral component of membrane // dendrite // melanosome // neuronal cell body // extracellular vesicular exosome // intermediate filament // membrane // membrane // integral component of membrane	GO:0005254 // GO:0015180 // GO:0015184 // GO:0015186 // GO:0015193 // GO:0015194 // GO:0015195 // GO:0017153 // GO:0034590 // GO:0015175 // GO:0015194 // GO:0015293	chloride channel activity // L-alanine transmembrane transporter activity // L-cystine transmembrane transporter activity // L-glutamine transmembrane transporter activity // L-proline transmembrane transporter activity // L-serine transmembrane transporter activity // L-threonine transmembrane transporter activity // sodium:dicarboxylate symporter activity // L-hydroxyproline transmembrane trans…	---	---	chrNA:-1--1	TC02000374.hg.1	6.3732	6.36903	6.32329	7.29681	7.42463	7.69689	6.9528	6.93223	6.89609	6.91863	7.31971	7.66506	6.69585	6.70744	7.00476	6.45349	6.29759	6.42494
145	TC02000407.hg.1	ANXA4	NM_001153	RefSeq	Homo sapiens annexin A4 (ANXA4), mRNA.	FALSE	chr2	GO:0006357 // GO:0007165 // GO:0030855 // GO:0032088 // GO:0043066 // GO:0043086 // GO:2000483 // GO:0050819	regulation of transcription from RNA polymerase II promoter // signal transduction // epithelial cell differentiation // negative regulation of NF-kappaB transcription factor activity // negative regulation of apoptotic process // negative regulation of catalytic activity // negative regulation of interleukin-8 secretion // negative regulation of coagulation	GO:0005634 // GO:0005737 // GO:0005737 // GO:0005886 // GO:0009986 // GO:0012506 // GO:0031965 // GO:0048471 // GO:0070062	nucleus // cytoplasm // cytoplasm // plasma membrane // cell surface // vesicle membrane // nuclear membrane // perinuclear region of cytoplasm // extracellular vesicular exosome	GO:0004859 // GO:0005509 // GO:0005544 // GO:0005544 // GO:0042802 // GO:0048306 // GO:0051059 // GO:0005509 // GO:0005544	phospholipase inhibitor activity // calcium ion binding // calcium-dependent phospholipid binding // calcium-dependent phospholipid binding // identical protein binding // calcium-dependent protein binding // NF-kappaB binding // calcium ion binding // calcium-dependent phospholipid binding	GenMAPP	Prostaglandin_synthesis_regulation	chrNA:-1--1	TC02000407.hg.1	7.83062	8.05616	7.53525	7.82851	8.06439	8.05709	6.78583	6.99696	6.8932	7.90746	8.52562	8.48936	7.46389	7.38694	7.37823	8.09845	8.89099	9.05716
146	TC02000412.hg.1	---	uc021viw.1	UCSC Genes	Homo sapiens mRNA; cDNA DKFZp313M158 (from clone DKFZp313M158).	FALSE	chr2	---	---	---	---	---	---	---	---	chrNA:-1--1	TC02000412.hg.1	7.10872	6.97465	6.96904	7.36155	7.40719	7.76757	6.30651	6.74225	6.53653	6.77299	6.20168	7.11503	6.35959	6.20831	6.68059	7.28821	7.96532	8.04365
147	TC02000506.hg.1	---	ENST00000408652	ENSEMBL	ncrna:novel chromosome:GRCh38:2:85299034:85299118:1 gene:ENSG00000221579 gene_biotype:miRNA transcript_biotype:miRNA	FALSE	chr2	---	---	---	---	---	---	---	---	chrNA:-1--1	TC02000506.hg.1	10.4912	10.4126	10.6638	10.6792	10.7745	10.354	10.0284	10.2139	10.2607	9.26644	9.29567	9.1829	10.2381	10.0621	10.2797	9.89771	10.0913	9.1316
148	TC02000535.hg.1	LINC00152	NR_024204	RefSeq	Homo sapiens long intergenic non-protein coding RNA 152 (LINC00152), transcript variant 1, long non-coding RNA.	FALSE	chr2	---	---	---	---	---	---	---	---	chrNA:-1--1	TC02000535.hg.1	12.4467	12.7429	12.6199	13.7123	13.9103	13.7656	12.5503	12.2319	12.2115	11.3219	11.2024	11.2108	12.7252	12.8498	12.7124	12.0243	12.4457	12.2072
149	TC02000538.hg.1	PLGLB1	NM_001032392	RefSeq	Homo sapiens plasminogen-like B1 (PLGLB1), mRNA.	FALSE	chr2	---	---	GO:0005576	extracellular region	---	---	---	---	chrNA:-1--1	TC02000538.hg.1	6.31646	6.40377	6.21476	7.89492	7.86429	7.39214	5.14319	5.15491	5.14334	5.88674	5.76444	6.04679	5.4896	5.66009	5.3742	5.99575	6.13589	5.78498
150	TC02000582.hg.1	NCAPH	NM_015341	RefSeq	Homo sapiens non-SMC condensin I complex, subunit H (NCAPH), transcript variant 1, mRNA.	FALSE	chr2	GO:0000278 // GO:0007076 // GO:0007049 // GO:0007067 // GO:0007076 // GO:0030261 // GO:0051301	mitotic cell cycle // mitotic chromosome condensation // cell cycle // mitotic nuclear division // mitotic chromosome condensation // chromosome condensation // cell division	GO:0000796 // GO:0005634 // GO:0005737 // GO:0005829 // GO:0015630 // GO:0000796 // GO:0005694 // GO:0005737 // GO:0016020	condensin complex // nucleus // cytoplasm // cytosol // microtubule cytoskeleton // condensin complex // chromosome // cytoplasm // membrane	GO:0005515	protein binding	---	---	chrNA:-1--1	TC02000582.hg.1	7.93531	8.35229	8.05819	7.89437	7.93167	7.9263	8.21076	8.16689	8.07812	7.95539	8.1006	8.35004	8.63105	8.4258	8.94548	6.28276	6.64385	6.83304
151	TC02000611.hg.1	NPAS2	NM_002518	RefSeq	Homo sapiens neuronal PAS domain protein 2 (NPAS2), mRNA.	FALSE	chr2	GO:0006351 // GO:0006974 // GO:0007165 // GO:0007417 // GO:0032922 // GO:0042745 // GO:0044255 // GO:0044281 // GO:0045475 // GO:0045739 // GO:0045893 // GO:0045893 // GO:0045944 // GO:0051775 // GO:0060548 // GO:2001020 // GO:0006355 // GO:0048511	transcription, DNA-templated // cellular response to DNA damage stimulus // signal transduction // central nervous system development // circadian regulation of gene expression // circadian sleep/wake cycle // cellular lipid metabolic process // small molecule metabolic process // locomotor rhythm // positive regulation of DNA repair // positive regulation of transcription, DNA-templated // posit…	GO:0005634 // GO:0005667 // GO:0005829 // GO:0005634 // GO:0005667 // GO:0005737	nucleus // transcription factor complex // cytosol // nucleus // transcription factor complex // cytoplasm	GO:0001047 // GO:0003677 // GO:0003677 // GO:0003700 // GO:0004871 // GO:0005515 // GO:0046872 // GO:0046983 // GO:0051879 // GO:0003677 // GO:0003700	core promoter binding // DNA binding // DNA binding // sequence-specific DNA binding transcription factor activity // signal transducer activity // protein binding // metal ion binding // protein dimerization activity // Hsp90 protein binding // DNA binding // sequence-specific DNA binding transcription factor activity	---	---	chrNA:-1--1	TC02000611.hg.1	6.76165	7.03995	6.92268	8.12738	8.21306	8.137	5.44693	5.60325	5.35578	5.69188	5.3921	5.72578	6.62802	6.5358	6.42854	6.98159	7.0986	7.09101
152	TC02000694.hg.1	ACOXL	NM_001142807	RefSeq	Homo sapiens acyl-CoA oxidase-like (ACOXL), mRNA.	FALSE	chr2	GO:0006635 // GO:0008150 // GO:0008152 // GO:0055114	fatty acid beta-oxidation // biological_process // metabolic process // oxidation-reduction process	GO:0005777 // GO:0005575	peroxisome // cellular_component	GO:0003995 // GO:0003997 // GO:0003674 // GO:0016491 // GO:0016627	acyl-CoA dehydrogenase activity // acyl-CoA oxidase activity // molecular_function // oxidoreductase activity // oxidoreductase activity, acting on the CH-CH group of donors	---	---	chrNA:-1--1	TC02000694.hg.1	5.4906	5.7408	5.58771	6.51659	6.7469	6.80496	4.60042	4.56066	4.67748	4.61629	4.58993	4.64054	4.78292	4.79032	4.79275	5.22955	4.98606	4.92705
153	TC02000705.hg.1	ZC3H6	NM_198581	RefSeq	Homo sapiens zinc finger CCCH-type containing 6 (ZC3H6), mRNA.	FALSE	chr2	GO:0008150	biological_process	GO:0005575	cellular_component	GO:0046872 // GO:0003674	metal ion binding // molecular_function	---	---	chrNA:-1--1	TC02000705.hg.1	6.67619	7.00039	6.89942	7.33022	7.27321	7.53954	6.4444	6.46133	6.44291	6.93004	7.27471	7.71385	5.9294	5.81929	5.76439	6.874	6.93726	7.22809
154	TC02000720.hg.1	IL1RN	NM_000577	RefSeq	Homo sapiens interleukin 1 receptor antagonist (IL1RN), transcript variant 3, mRNA.	FALSE	chr2	GO:0001660 // GO:0001960 // GO:0002439 // GO:0006629 // GO:0006953 // GO:0006955 // GO:0007565 // GO:0007613 // GO:0010243 // GO:0014050 // GO:0019752 // GO:0030073 // GO:0030336 // GO:0032496 // GO:0034115 // GO:0042493 // GO:0043066 // GO:0043507 // GO:0045837 // GO:0051384 // GO:0070670 // GO:2000660 // GO:0014070	fever generation // negative regulation of cytokine-mediated signaling pathway // chronic inflammatory response to antigenic stimulus // lipid metabolic process // acute-phase response // immune response // female pregnancy // memory // response to organonitrogen compound // negative regulation of glutamate secretion // carboxylic acid metabolic process // insulin secretion // negative regulation…	GO:0005615 // GO:0005622 // GO:0005737 // GO:0005886 // GO:0070062 // GO:0005576 // GO:0005615 // GO:0031982	extracellular space // intracellular // cytoplasm // plasma membrane // extracellular vesicular exosome // extracellular region // extracellular space // vesicle	GO:0005149 // GO:0005150 // GO:0005151 // GO:0005152 // GO:0005152 // GO:0045352 // GO:0045353 // GO:0005149 // GO:0005152	interleukin-1 receptor binding // interleukin-1, Type I receptor binding // interleukin-1, Type II receptor binding // interleukin-1 receptor antagonist activity // interleukin-1 receptor antagonist activity // interleukin-1 Type I receptor antagonist activity // interleukin-1 Type II receptor antagonist activity // interleukin-1 receptor binding // interleukin-1 receptor antagonist activity	---	---	chrNA:-1--1	TC02000720.hg.1	5.17343	5.08723	5.23888	6.05467	6.05646	6.24418	4.60795	4.82231	4.90602	4.92297	4.68861	4.91832	5.66569	5.70358	5.34173	6.32229	5.83451	6.092
155	TC02000880.hg.1	---	ENST00000385573	ENSEMBL	ncrna:novel chromosome:GRCh38:2:135136628:135136755:1 gene:ENSG00000208308 gene_biotype:snoRNA transcript_biotype:snoRNA	FALSE	chr2	---	---	---	---	---	---	---	---	chrNA:-1--1	TC02000880.hg.1	10.8252	10.666	10.4611	12.0206	12.1522	11.8002	10.0796	10.5299	10.9083	9.09315	9.37416	9.81114	9.96556	9.91295	10.471	10.6846	10.8426	9.77704
156	TC02000891.hg.1	HNMT	NM_001024074	RefSeq	Homo sapiens histamine N-methyltransferase (HNMT), transcript variant 2, mRNA.	FALSE	chr2	GO:0002347 // GO:0006972 // GO:0007420 // GO:0007585 // GO:0014075 // GO:0032259 // GO:0042220 // GO:0051384 // GO:0070555	response to tumor cell // hyperosmotic response // brain development // respiratory gaseous exchange // response to amine // methylation // response to cocaine // response to glucocorticoid // response to interleukin-1	GO:0005634 // GO:0005730 // GO:0005737 // GO:0043005 // GO:0070062 // GO:0005737	nucleus // nucleolus // cytoplasm // neuron projection // extracellular vesicular exosome // cytoplasm	GO:0046539 // GO:0008168 // GO:0008170 // GO:0016740	histamine N-methyltransferase activity // methyltransferase activity // N-methyltransferase activity // transferase activity	---	---	chrNA:-1--1	TC02000891.hg.1	7.0074	7.44105	7.15778	5.99052	5.77123	5.72495	5.45281	5.678	5.68943	5.58761	6.07548	6.20105	5.62749	5.5793	5.53347	5.74911	5.47116	5.34367
157	TC02000928.hg.1	LYPD6B	NM_177964	RefSeq	Homo sapiens LY6/PLAUR domain containing 6B (LYPD6B), mRNA.	FALSE	chr2	---	---	GO:0005886 // GO:0031225 // GO:0016020	plasma membrane // anchored component of membrane // membrane	---	---	---	---	chrNA:-1--1	TC02000928.hg.1	6.58807	6.61317	6.64887	6.34848	6.37059	6.36298	11.4405	11.285	11.448	9.66373	9.49306	9.53732	7.56165	7.52135	7.50978	7.72697	7.8544	7.97226
158	TC02000991.hg.1	---	ENST00000458755	ENSEMBL	[retired]ncrna:snoRNA chromosome:GRCh37:2:167215240:167215343:1 gene:ENSG00000238662 gene_biotype:snoRNA transcript_biotype:snoRNA	FALSE	chr2	---	---	---	---	---	---	---	---	chrNA:-1--1	TC02000991.hg.1	5.55057	4.54166	4.82077	4.5778	4.96517	4.40152	4.41819	4.47643	4.42813	5.19784	5.03286	5.1921	4.60704	4.69043	5.01177	4.71783	5.06644	4.42748
159	TC02001035.hg.1	CDCA7	NM_031942	RefSeq	Homo sapiens cell division cycle associated 7 (CDCA7), transcript variant 1, mRNA.	FALSE	chr2	GO:0006351 // GO:0006355 // GO:0006915 // GO:0042127 // GO:0051301	transcription, DNA-templated // regulation of transcription, DNA-templated // apoptotic process // regulation of cell proliferation // cell division	GO:0005634 // GO:0005730 // GO:0005737 // GO:0005634 // GO:0005737	nucleus // nucleolus // cytoplasm // nucleus // cytoplasm	---	---	---	---	chrNA:-1--1	TC02001035.hg.1	8.47302	8.91497	8.64624	9.03037	8.76279	8.83742	7.36792	7.66664	7.40719	7.73482	8.02199	8.46297	8.12581	8.12996	8.35888	5.489	5.40299	5.53093
160	TC02001105.hg.1	COL3A1	NM_000090	RefSeq	Homo sapiens collagen, type III, alpha 1 (COL3A1), mRNA.	FALSE	chr2	GO:0001501 // GO:0001568 // GO:0007160 // GO:0007179 // GO:0007229 // GO:0007411 // GO:0007507 // GO:0007568 // GO:0009314 // GO:0009612 // GO:0018149 // GO:0021987 // GO:0022617 // GO:0030168 // GO:0030198 // GO:0030199 // GO:0030199 // GO:0030574 // GO:0034097 // GO:0035025 // GO:0042060 // GO:0042060 // GO:0043206 // GO:0043588 // GO:0048565 // GO:0050777 // GO:0071230 // GO:2001223 // GO:0021…	skeletal system development // blood vessel development // cell-matrix adhesion // transforming growth factor beta receptor signaling pathway // integrin-mediated signaling pathway // axon guidance // heart development // aging // response to radiation // response to mechanical stimulus // peptide cross-linking // cerebral cortex development // extracellular matrix disassembly // platelet activat…	GO:0005576 // GO:0005586 // GO:0005586 // GO:0005615 // GO:0005615 // GO:0005788 // GO:0031012 // GO:0031012 // GO:0005576 // GO:0005578 // GO:0005581 // GO:0005586 // GO:0031012	extracellular region // collagen type III trimer // collagen type III trimer // extracellular space // extracellular space // endoplasmic reticulum lumen // extracellular matrix // extracellular matrix // extracellular region // proteinaceous extracellular matrix // collagen trimer // collagen type III trimer // extracellular matrix	GO:0005178 // GO:0005178 // GO:0005201 // GO:0005515 // GO:0046332 // GO:0046872 // GO:0048407 // GO:0005201	integrin binding // integrin binding // extracellular matrix structural constituent // protein binding // SMAD binding // metal ion binding // platelet-derived growth factor binding // extracellular matrix structural constituent	GenMAPP	Inflammatory_Response_Pathway	chrNA:-1--1	TC02001105.hg.1	5.19207	4.84853	5.1779	5.06565	5.13377	4.95344	9.49561	9.89047	9.86696	7.18288	7.16293	7.2863	5.25769	5.35439	5.27398	5.53368	5.12293	5.12506
161	TC02001128.hg.1	NABP1	NM_001031716	RefSeq	Homo sapiens nucleic acid binding protein 1 (NABP1), transcript variant 1, mRNA.	FALSE	chr2	GO:0000724 // GO:0006281 // GO:0006974 // GO:0007093 // GO:0010212 // GO:0006281 // GO:0006974	double-strand break repair via homologous recombination // DNA repair // cellular response to DNA damage stimulus // mitotic cell cycle checkpoint // response to ionizing radiation // DNA repair // cellular response to DNA damage stimulus	GO:0005634 // GO:0005730 // GO:0005737 // GO:0070876 // GO:0005634	nucleus // nucleolus // cytoplasm // SOSS complex // nucleus	GO:0003697 // GO:0003723 // GO:0003676 // GO:0003677	single-stranded DNA binding // RNA binding // nucleic acid binding // DNA binding	---	---	chrNA:-1--1	TC02001128.hg.1	11.0427	11.8402	11.4413	12.6318	12.7076	12.8321	11.3123	11.1725	11.4955	10.7691	10.9277	11.3945	10.2719	10.174	10.5954	11.3194	11.8339	11.8246
162	TC02001161.hg.1	SGOL2	NM_001160033	RefSeq	Homo sapiens shugoshin-like 2 (S. pombe) (SGOL2), transcript variant 2, mRNA.	FALSE	chr2	GO:0000278 // GO:0051754 // GO:0007049 // GO:0007059 // GO:0007126 // GO:0051301	mitotic cell cycle // meiotic sister chromatid cohesion, centromeric // cell cycle // chromosome segregation // meiotic nuclear division // cell division	GO:0000775 // GO:0000777 // GO:0005634 // GO:0005730 // GO:0005829 // GO:0030892 // GO:0000775 // GO:0000776 // GO:0005634 // GO:0005694	chromosome, centromeric region // condensed chromosome kinetochore // nucleus // nucleolus // cytosol // mitotic cohesin complex // chromosome, centromeric region // kinetochore // nucleus // chromosome	GO:0005515	protein binding	---	---	chrNA:-1--1	TC02001161.hg.1	7.60257	7.92117	7.64825	7.31475	7.14553	7.1569	8.52917	8.2109	8.09166	7.38875	7.40147	7.56564	7.59542	7.43788	7.57864	6.55989	6.32817	6.11536
163	TC02001174.hg.1	CFLAR	NM_001127183	RefSeq	Homo sapiens CASP8 and FADD-like apoptosis regulator (CFLAR), transcript variant 2, mRNA.	FALSE	chr2	GO:0006508 // GO:0006915 // GO:0006915 // GO:0007519 // GO:0014732 // GO:0014842 // GO:0014866 // GO:0016032 // GO:0043066 // GO:0043085 // GO:0043123 // GO:0043403 // GO:0051092 // GO:0060544 // GO:0097190 // GO:1901740 // GO:1902042 // GO:2001237 // GO:2001237 // GO:2001239 // GO:0006915 // GO:0042981 // GO:0043066	proteolysis // apoptotic process // apoptotic process // skeletal muscle tissue development // skeletal muscle atrophy // regulation of satellite cell proliferation // skeletal myofibril assembly // viral process // negative regulation of apoptotic process // positive regulation of catalytic activity // positive regulation of I-kappaB kinase/NF-kappaB signaling // skeletal muscle tissue regenerat…	GO:0005737 // GO:0005829 // GO:0031264 // GO:0031265 // GO:0097342	cytoplasm // cytosol // death-inducing signaling complex // CD95 death-inducing signaling complex // ripoptosome	GO:0002020 // GO:0004197 // GO:0005515 // GO:0008047 // GO:0035877 // GO:0004197 // GO:0008234 // GO:0035877 // GO:0004197	protease binding // cysteine-type endopeptidase activity // protein binding // enzyme activator activity // death effector domain binding // cysteine-type endopeptidase activity // cysteine-type peptidase activity // death effector domain binding // cysteine-type endopeptidase activity	---	---	chrNA:-1--1	TC02001174.hg.1	7.12703	7.2672	7.18149	7.94961	7.95319	7.98601	8.35622	8.58341	8.92986	8.90035	9.26031	9.52345	6.79733	6.99315	6.9904	7.27775	7.27009	7.11105
164	TC02001195.hg.1	NBEAL1	NM_001114132	RefSeq	Homo sapiens neurobeachin-like 1 (NBEAL1), mRNA.	FALSE	chr2	---	---	---	---	---	---	---	---	chrNA:-1--1	TC02001195.hg.1	7.8807	8.34468	8.41983	8.25266	8.00651	7.96551	7.86546	7.9492	8.06475	7.51867	7.74849	8.10589	6.42252	6.37975	6.72093	7.33114	7.92743	7.76339
165	TC02001213.hg.1	SNORD51	NR_002589	RefSeq	Homo sapiens small nucleolar RNA, C/D box 51 (SNORD51), small nucleolar RNA.	FALSE	chr2	---	---	---	---	---	---	---	---	chrNA:-1--1	TC02001213.hg.1	8.93035	8.48151	9.22314	8.95804	9.53524	9.76161	9.55883	9.09185	9.10055	9.50311	7.73264	8.47602	10.4181	10.666	10.6795	9.50101	9.0451	9.94834
166	TC02001223.hg.1	AC008269.2	OTTHUMT00000336809	Havana transcript	cdna:all chromosome:VEGA56:2:206866795:206868289:1 Gene:OTTHUMG00000154733	FALSE	chr2	---	---	---	---	---	---	---	---	chrNA:-1--1	TC02001223.hg.1	4.36113	4.37508	4.5037	8.22885	6.84879	7.93222	4.2041	4.58532	5.0077	5.16834	4.97523	5.04456	4.40107	4.8689	4.67908	5.96048	5.01219	5.22548
167	TC02001224.hg.1	CPO	NM_173077	RefSeq	Homo sapiens carboxypeptidase O (CPO), mRNA.	FALSE	chr2	GO:0006508	proteolysis	GO:0005576	extracellular region	GO:0004181 // GO:0008270 // GO:0004180 // GO:0008233 // GO:0008237 // GO:0016787 // GO:0046872	metallocarboxypeptidase activity // zinc ion binding // carboxypeptidase activity // peptidase activity // metallopeptidase activity // hydrolase activity // metal ion binding	---	---	chrNA:-1--1	TC02001224.hg.1	4.66293	4.30909	4.46981	5.90424	5.92201	5.95045	4.47124	4.49986	4.55244	4.67197	4.86793	4.93703	4.47783	4.62038	4.4082	4.98435	4.62404	4.49771
168	TC02001232.hg.1	CCNYL1	NM_001142300	RefSeq	Homo sapiens cyclin Y-like 1 (CCNYL1), transcript variant 1, mRNA.	FALSE	chr2	GO:0000079	regulation of cyclin-dependent protein serine/threonine kinase activity	---	---	GO:0019901	protein kinase binding	---	---	chrNA:-1--1	TC02001232.hg.1	7.58525	7.82404	7.64744	7.96673	7.96894	8.24077	10.4965	10.0836	10.3656	9.58929	9.22319	9.47371	10.4343	10.1093	9.96331	8.74109	8.80733	9.00454
169	TC02001238.hg.1	MAP2	NM_001039538	RefSeq	Homo sapiens microtubule-associated protein 2 (MAP2), transcript variant 5, mRNA.	FALSE	chr2	GO:0001578 // GO:0007409 // GO:0018107 // GO:0021954 // GO:0031175 // GO:0048813 // GO:0071310 // GO:0016358 // GO:0008150	microtubule bundle formation // axonogenesis // peptidyl-threonine phosphorylation // central nervous system neuron development // neuron projection development // dendrite morphogenesis // cellular response to organic substance // dendrite development // biological_process	GO:0005737 // GO:0005874 // GO:0005875 // GO:0034399 // GO:0043025 // GO:0043198 // GO:0005622 // GO:0005856 // GO:0043005 // GO:0044297 // GO:0005875	cytoplasm // microtubule // microtubule associated complex // nuclear periphery // neuronal cell body // dendritic shaft // intracellular // cytoskeleton // neuron projection // cell body // microtubule associated complex	GO:0002162 // GO:0005198 // GO:0005515 // GO:0005516 // GO:0008017 // GO:0015631 // GO:0003674	dystroglycan binding // structural molecule activity // protein binding // calmodulin binding // microtubule binding // tubulin binding // molecular_function	GenMAPP	MAPK_Cascade	chrNA:-1--1	TC02001238.hg.1	6.1636	6.39892	6.4619	6.2172	5.99014	6.00212	5.57557	6.05512	5.93373	7.91869	7.48707	7.91441	9.41706	9.47978	9.22545	10.4921	11.2056	11.1661
170	TC02001273.hg.1	PKI55	NR_037701	RefSeq	Homo sapiens DKFZp434H1419 (PKI55), long non-coding RNA.	FALSE	chr2	---	---	---	---	---	---	---	---	chrNA:-1--1	TC02001273.hg.1	10.1539	10.0572	10.0934	8.39944	8.3639	8.24596	7.54731	7.54432	7.80466	6.79844	7.03328	7.18417	8.66137	8.84963	9.05713	7.28855	8.14259	7.97693
171	TC02001364.hg.1	CCL20	NM_001130046	RefSeq	Homo sapiens chemokine (C-C motif) ligand 20 (CCL20), transcript variant 2, mRNA.	FALSE	chr2	GO:0006935 // GO:0006954 // GO:0006955 // GO:0007165 // GO:0007267 // GO:0042466 // GO:0042742 // GO:0060326 // GO:0060326 // GO:2000406 // GO:0006935 // GO:0006954 // GO:0006955	chemotaxis // inflammatory response // immune response // signal transduction // cell-cell signaling // chemokinesis // defense response to bacterium // cell chemotaxis // cell chemotaxis // positive regulation of T cell migration // chemotaxis // inflammatory response // immune response	GO:0005576 // GO:0005615 // GO:0005576 // GO:0005615	extracellular region // extracellular space // extracellular region // extracellular space	GO:0005515 // GO:0008009 // GO:0005125 // GO:0008009	protein binding // chemokine activity // cytokine activity // chemokine activity	---	---	chrNA:-1--1	TC02001364.hg.1	9.84106	9.99859	9.86072	11.1545	11.0664	10.974	5.16273	5.87545	5.77486	6.45106	6.66775	6.53819	6.78889	6.78837	6.98271	8.34181	8.93652	8.70078
172	TC02001420.hg.1	UGT1A1	NM_000463	RefSeq	Homo sapiens UDP glucuronosyltransferase 1 family, polypeptide A1 (UGT1A1), mRNA.	FALSE	chr2	GO:0001889 // GO:0006778 // GO:0006789 // GO:0006805 // GO:0006953 // GO:0007584 // GO:0007586 // GO:0008202 // GO:0008210 // GO:0017144 // GO:0031100 // GO:0032496 // GO:0042167 // GO:0042493 // GO:0042573 // GO:0042594 // GO:0043086 // GO:0044281 // GO:0045939 // GO:0046483 // GO:0051552 // GO:0052695 // GO:0052695 // GO:0052696 // GO:0052697 // GO:0070980 // GO:0071361 // GO:0071385 // GO:2001…	liver development // porphyrin-containing compound metabolic process // bilirubin conjugation // xenobiotic metabolic process // acute-phase response // response to nutrient // digestion // steroid metabolic process // estrogen metabolic process // drug metabolic process // organ regeneration // response to lipopolysaccharide // heme catabolic process // response to drug // retinoic acid metaboli…	GO:0005783 // GO:0005789 // GO:0005887 // GO:0070069 // GO:0005783 // GO:0005789 // GO:0016020 // GO:0016021 // GO:0043231 // GO:0005783 // GO:0070062 // GO:0005789 // GO:0043231	endoplasmic reticulum // endoplasmic reticulum membrane // integral component of plasma membrane // cytochrome complex // endoplasmic reticulum // endoplasmic reticulum membrane // membrane // integral component of membrane // intracellular membrane-bounded organelle // endoplasmic reticulum // extracellular vesicular exosome // endoplasmic reticulum membrane // intracellular membrane-bounded org…	GO:0001972 // GO:0004857 // GO:0005496 // GO:0015020 // GO:0015020 // GO:0019899 // GO:0042803 // GO:0042803 // GO:0046982 // GO:0046982 // GO:0005080 // GO:0015020 // GO:0016740 // GO:0016757 // GO:0016758 // GO:0019899 // GO:0008194 // GO:0008144 // GO:0001972 // GO:0005504 // GO:0008144 // GO:0019899	retinoic acid binding // enzyme inhibitor activity // steroid binding // glucuronosyltransferase activity // glucuronosyltransferase activity // enzyme binding // protein homodimerization activity // protein homodimerization activity // protein heterodimerization activity // protein heterodimerization activity // protein kinase C binding // glucuronosyltransferase activity // transferase activity…	GenMAPP	Irinotecan_pathway_PharmGKB	chrNA:-1--1	TC02001420.hg.1	9.56505	9.82164	9.66169	8.34263	8.02288	8.07057	6.39142	6.67653	6.91304	7.50154	8.21731	8.24538	12.197	12.1601	12.61	12.0513	13.3555	13.0523
173	TC02001455.hg.1	ASB1	NM_001040445	RefSeq	Homo sapiens ankyrin repeat and SOCS box containing 1 (ASB1), mRNA.	FALSE	chr2	GO:0016567 // GO:0030539 // GO:0035556 // GO:0042036 // GO:0007275	protein ubiquitination // male genitalia development // intracellular signal transduction // negative regulation of cytokine biosynthetic process // multicellular organismal development	GO:0005622	intracellular	GO:0003674	molecular_function	---	---	chrNA:-1--1	TC02001455.hg.1	8.24924	8.46059	8.36682	9.55711	9.8242	9.65866	7.1462	6.89652	7.11572	7.43869	7.33356	7.69182	8.16268	8.10329	8.1344	8.14139	8.4014	8.80533
174	TC02001621.hg.1	PUM2	NM_015317	RefSeq	Homo sapiens pumilio RNA-binding family member 2 (PUM2), transcript variant 1, mRNA.	FALSE	chr2	GO:0006417 // GO:0034063	regulation of translation // stress granule assembly	GO:0005737 // GO:0010494 // GO:0031965 // GO:0048471 // GO:0005737 // GO:0010494 // GO:0048471	cytoplasm // cytoplasmic stress granule // nuclear membrane // perinuclear region of cytoplasm // cytoplasm // cytoplasmic stress granule // perinuclear region of cytoplasm	GO:0005515 // GO:0044822 // GO:0003723	protein binding // poly(A) RNA binding // RNA binding	---	---	chrNA:-1--1	TC02001621.hg.1	10.7292	10.6696	10.7469	11.3174	11.3341	11.2925	8.90036	8.74885	8.77444	8.63016	8.97652	9.35725	9.31371	9.25774	9.37104	9.3434	9.97474	9.7733
175	TC02001681.hg.1	MPV17	NM_002437	RefSeq	Homo sapiens MpV17 mitochondrial inner membrane protein (MPV17), mRNA.	FALSE	chr2	GO:0000002 // GO:0032836 // GO:0034614 // GO:0042592 // GO:0048839 // GO:0072593 // GO:2000377 // GO:0032836 // GO:0034614 // GO:0048839 // GO:2000377	mitochondrial genome maintenance // glomerular basement membrane development // cellular response to reactive oxygen species // homeostatic process // inner ear development // reactive oxygen species metabolic process // regulation of reactive oxygen species metabolic process // glomerular basement membrane development // cellular response to reactive oxygen species // inner ear development // re…	GO:0005739 // GO:0005743 // GO:0005777 // GO:0005777 // GO:0016021 // GO:0005739 // GO:0005743 // GO:0016020 // GO:0005777	mitochondrion // mitochondrial inner membrane // peroxisome // peroxisome // integral component of membrane // mitochondrion // mitochondrial inner membrane // membrane // peroxisome	GO:0003674	molecular_function	---	---	chrNA:-1--1	TC02001681.hg.1	8.17799	8.25907	8.13308	8.60589	8.78108	8.58841	8.05202	8.10488	8.01496	8.90452	8.82057	8.73882	8.56777	8.46479	8.566	9.05516	9.32951	9.12443
176	TC02001749.hg.1	CYP1B1	OTTHUMT00000325647	Havana transcript	cdna:all chromosome:VEGA56:2:38066973:38070697:-1 Gene:OTTHUMG00000100970	FALSE	chr2	---	---	---	---	---	---	---	---	chrNA:-1--1	TC02001749.hg.1	7.15411	7.20384	7.27916	5.54404	4.99352	5.15997	5.1639	4.94952	5.19593	5.07623	5.19083	5.10923	4.91756	4.95279	4.85104	5.16981	5.43195	5.22923
177	TC02002126.hg.1	COA5	NM_001008215	RefSeq	Homo sapiens cytochrome c oxidase assembly factor 5 (COA5), mRNA.	FALSE	chr2	---	---	GO:0005739 // GO:0005739	mitochondrion // mitochondrion	---	---	---	---	chrNA:-1--1	TC02002126.hg.1	8.80381	9.05171	8.57991	8.82091	8.80536	8.66149	7.96799	8.24313	8.17204	8.76978	9.27473	9.69174	8.36191	8.06197	8.23947	8.90145	9.2931	9.48336
178	TC02002204.hg.1	BUB1	NM_004336	RefSeq	Homo sapiens BUB1 mitotic checkpoint serine/threonine kinase (BUB1), transcript variant 1, mRNA.	FALSE	chr2	GO:0000278 // GO:0006468 // GO:0006915 // GO:0007059 // GO:0007063 // GO:0007067 // GO:0007093 // GO:0007094 // GO:0008283 // GO:0016032 // GO:0051983 // GO:0071173 // GO:0071173 // GO:2001244 // GO:0007049 // GO:0016310 // GO:0051301 // GO:0071174	mitotic cell cycle // protein phosphorylation // apoptotic process // chromosome segregation // regulation of sister chromatid cohesion // mitotic nuclear division // mitotic cell cycle checkpoint // mitotic spindle assembly checkpoint // cell proliferation // viral process // regulation of chromosome segregation // spindle assembly checkpoint // spindle assembly checkpoint // positive regulation…	GO:0000776 // GO:0000777 // GO:0000780 // GO:0005634 // GO:0005730 // GO:0005737 // GO:0005829 // GO:0000775 // GO:0000776 // GO:0000777 // GO:0005634 // GO:0005694 // GO:0016020	kinetochore // condensed chromosome kinetochore // condensed nuclear chromosome, centromeric region // nucleus // nucleolus // cytoplasm // cytosol // chromosome, centromeric region // kinetochore // condensed chromosome kinetochore // nucleus // chromosome // membrane	GO:0004672 // GO:0004674 // GO:0005515 // GO:0005524 // GO:0000166 // GO:0004672 // GO:0016301 // GO:0016740 // GO:0016772	protein kinase activity // protein serine/threonine kinase activity // protein binding // ATP binding // nucleotide binding // protein kinase activity // kinase activity // transferase activity // transferase activity, transferring phosphorus-containing groups	GenMAPP	Cell_cycle_KEGG	chrNA:-1--1	TC02002204.hg.1	9.31758	9.93784	9.46413	9.35525	9.27652	9.41758	10.2994	10.215	10.0952	9.10121	9.03304	9.36144	9.83346	9.59579	9.80913	7.36236	7.54339	7.68063
179	TC02002207.hg.1	MIR4435-1HG	NR_015395	RefSeq	Homo sapiens MIR4435-1 host gene (non-protein coding) (MIR4435-1HG), transcript variant 1, long non-coding RNA.	FALSE	chr2	---	---	---	---	---	---	---	---	chrNA:-1--1	TC02002207.hg.1	10.7286	11.1248	10.9216	12.0131	12.0933	12.087	10.6036	10.1605	10.2801	9.15543	9.30963	9.39894	10.421	10.5613	10.6077	9.94112	10.286	9.91514
180	TC02002216.hg.1	FLJ42351	NR_033871	RefSeq	Homo sapiens uncharacterized LOC400999 (FLJ42351), long non-coding RNA.	FALSE	chr2	---	---	---	---	---	---	---	---	chrNA:-1--1	TC02002216.hg.1	4.72917	4.74464	4.62372	5.4641	5.56545	5.50294	4.36553	4.57132	4.38354	5.07996	5.72107	5.08648	4.39884	4.61848	4.58795	4.7045	4.67322	4.81548
181	TC02002217.hg.1	CKAP2L	NM_152515	RefSeq	Homo sapiens cytoskeleton associated protein 2-like (CKAP2L), mRNA.	FALSE	chr2	---	---	GO:0000922 // GO:0005737 // GO:0005813 // GO:0005856	spindle pole // cytoplasm // centrosome // cytoskeleton	---	---	---	---	chrNA:-1--1	TC02002217.hg.1	8.42525	8.95179	8.7387	8.9369	8.82774	9.12766	9.58175	9.06158	9.19594	8.87197	8.62278	9.11733	8.84354	8.69343	8.83777	6.54278	6.07769	6.21106
182	TC02002218.hg.1	IL1A	NM_000575	RefSeq	Homo sapiens interleukin 1, alpha (IL1A), mRNA.	FALSE	chr2	GO:0001660 // GO:0006915 // GO:0006954 // GO:0006955 // GO:0008283 // GO:0008285 // GO:0010575 // GO:0019221 // GO:0034605 // GO:0035234 // GO:0045086 // GO:0045766 // GO:0045840 // GO:0045944 // GO:0046688 // GO:0050715 // GO:0051781 // GO:0097192 // GO:2001240 // GO:0006954 // GO:0010575 // GO:0045766	fever generation // apoptotic process // inflammatory response // immune response // cell proliferation // negative regulation of cell proliferation // positive regulation vascular endothelial growth factor production // cytokine-mediated signaling pathway // cellular response to heat // ectopic germ cell programmed cell death // positive regulation of interleukin-2 biosynthetic process // positi…	GO:0005576 // GO:0005615 // GO:0005615 // GO:0005829 // GO:0005576 // GO:0005615 // GO:0005615	extracellular region // extracellular space // extracellular space // cytosol // extracellular region // extracellular space // extracellular space	GO:0005125 // GO:0005149 // GO:0005507 // GO:0005515 // GO:0005125 // GO:0005125	cytokine activity // interleukin-1 receptor binding // copper ion binding // protein binding // cytokine activity // cytokine activity	GenMAPP	Hypertrophy_model	chrNA:-1--1	TC02002218.hg.1	11.611	12.1691	11.9703	12.3146	12.3583	12.836	5.97379	5.62277	5.52221	5.92814	5.91827	6.17732	8.69178	8.74203	8.52511	9.06806	9.51403	9.66832
183	TC02002244.hg.1	CCDC93	NM_019044	RefSeq	Homo sapiens coiled-coil domain containing 93 (CCDC93), mRNA.	FALSE	chr2	---	---	---	---	---	---	---	---	chrNA:-1--1	TC02002244.hg.1	9.25367	9.81023	9.56316	10.9633	10.791	10.9255	8.18014	8.27274	8.48625	8.28794	8.43453	8.87649	7.05838	7.20296	7.38553	6.7496	7.33525	6.97742
184	TC02002376.hg.1	MCM6	NM_005915	RefSeq	Homo sapiens minichromosome maintenance complex component 6 (MCM6), mRNA.	FALSE	chr2	GO:0000082 // GO:0000278 // GO:0006260 // GO:0006260 // GO:0006268 // GO:0006270 // GO:0006271 // GO:0006260 // GO:0007049	G1/S transition of mitotic cell cycle // mitotic cell cycle // DNA replication // DNA replication // DNA unwinding involved in DNA replication // DNA replication initiation // DNA strand elongation involved in DNA replication // DNA replication // cell cycle	GO:0005634 // GO:0005634 // GO:0005654 // GO:0005730 // GO:0042555 // GO:0005634 // GO:0042555	nucleus // nucleus // nucleoplasm // nucleolus // MCM complex // nucleus // MCM complex	GO:0003697 // GO:0004003 // GO:0005515 // GO:0005524 // GO:0042802 // GO:0000166 // GO:0003677 // GO:0003678 // GO:0004386 // GO:0005524 // GO:0016787	single-stranded DNA binding // ATP-dependent DNA helicase activity // protein binding // ATP binding // identical protein binding // nucleotide binding // DNA binding // DNA helicase activity // helicase activity // ATP binding // hydrolase activity	GenMAPP // GenMAPP // GenMAPP	Cell_cycle_KEGG // DNA_replication_Reactome // G1_to_S_cell_cycle_Reactome	chrNA:-1--1	TC02002376.hg.1	9.3386	9.64496	9.27539	9.00225	8.87852	9.12676	10.0365	10.0735	9.97358	10.164	10.4905	10.7856	8.94833	8.66193	9.01739	6.26783	6.6747	6.05441
185	TC02002469.hg.1	ITGB6	NM_000888	RefSeq	Homo sapiens integrin, beta 6 (ITGB6), transcript variant 1, mRNA.	FALSE	chr2	GO:0006954 // GO:0007155 // GO:0007160 // GO:0007229 // GO:0007275 // GO:0009615 // GO:0016032 // GO:0030198 // GO:0007155	inflammatory response // cell adhesion // cell-matrix adhesion // integrin-mediated signaling pathway // multicellular organismal development // response to virus // viral process // extracellular matrix organization // cell adhesion	GO:0005886 // GO:0008305 // GO:0043235 // GO:0070062 // GO:0008305 // GO:0016020 // GO:0016021	plasma membrane // integrin complex // receptor complex // extracellular vesicular exosome // integrin complex // membrane // integral component of membrane	GO:0001618 // GO:0005178 // GO:0004872	virus receptor activity // integrin binding // receptor activity	GenMAPP // GenMAPP	Integrin-mediated_cell_adhesion_KEGG // TGF_Beta_Signaling_Pathway	chrNA:-1--1	TC02002469.hg.1	9.1309	9.34411	9.4837	7.55987	7.06886	6.98156	5.2189	5.1426	5.29779	4.9661	5.18485	5.42848	8.33315	8.52032	8.79351	8.3824	8.8973	8.94583
186	TC02002507.hg.1	SPC25	NM_020675	RefSeq	Homo sapiens SPC25, NDC80 kinetochore complex component (SPC25), mRNA.	FALSE	chr2	GO:0000278 // GO:0007052 // GO:0007059 // GO:0007067 // GO:0007049 // GO:0051301	mitotic cell cycle // mitotic spindle organization // chromosome segregation // mitotic nuclear division // cell cycle // cell division	GO:0000777 // GO:0005634 // GO:0005829 // GO:0031262 // GO:0000775 // GO:0000776 // GO:0000777 // GO:0005694	condensed chromosome kinetochore // nucleus // cytosol // Ndc80 complex // chromosome, centromeric region // kinetochore // condensed chromosome kinetochore // chromosome	GO:0005515	protein binding	---	---	chrNA:-1--1	TC02002507.hg.1	9.30484	9.70834	9.10022	9.18508	9.15343	8.98821	9.49919	9.73191	9.50021	8.98803	8.98984	9.27688	9.92778	9.6763	10.1595	7.82774	7.72585	7.46996
187	TC02002516.hg.1	HMGB1P4	ENST00000420678	ENSEMBL	[retired]cdna:pseudogene chromosome:GRCh37:2:171458589:171458738:-1 gene:ENSG00000214821 gene_biotype:pseudogene transcript_biotype:processed_pseudogene	FALSE	chr2	---	---	---	---	---	---	---	---	chrNA:-1--1	TC02002516.hg.1	8.63888	8.92427	9.27362	8.55467	8.22331	9.27222	10.1575	10.0577	9.86256	9.54359	9.51832	9.82995	11.9091	11.8084	11.7464	10.6968	10.1499	9.75987
188	TC02002628.hg.1	TMEFF2	NM_016192	RefSeq	Homo sapiens transmembrane protein with EGF-like and two follistatin-like domains 2 (TMEFF2), mRNA.	FALSE	chr2	---	---	GO:0005576 // GO:0016021 // GO:0016020 // GO:0016021	extracellular region // integral component of membrane // membrane // integral component of membrane	GO:0003674	molecular_function	---	---	chrNA:-1--1	TC02002628.hg.1	4.79337	4.80647	4.83161	4.5338	4.61633	4.51888	5.86122	5.84888	5.7802	4.87459	5.01155	5.09265	4.76392	4.73528	4.90657	5.1106	4.74257	4.86026
189	TC02002681.hg.1	AC079354.5	OTTHUMT00000336165	Havana transcript	cdna:all chromosome:VEGA56:2:202178660:202179391:-1 Gene:OTTHUMG00000154582	FALSE	chr2	---	---	---	---	---	---	---	---	chrNA:-1--1	TC02002681.hg.1	4.75683	4.81677	4.24755	5.39243	5.34917	5.273	6.12774	6.11698	5.92643	7.04688	7.3258	7.11856	4.80405	4.96049	4.88565	5.01871	4.68792	5.08346
190	TC02002689.hg.1	---	ENST00000390147	ENSEMBL	ncrna:novel chromosome:GRCh38:2:203764707:203764798:-1 gene:ENSG00000211573 gene_biotype:miRNA transcript_biotype:miRNA	FALSE	chr2	---	---	---	---	---	---	---	---	chrNA:-1--1	TC02002689.hg.1	7.67954	8.75303	8.44005	8.21231	7.80633	8.41733	11.1992	10.5083	10.4523	7.85785	7.91631	7.84933	8.56301	8.89874	8.69975	8.16997	7.40646	7.64672
191	TC02002698.hg.1	GPR1	NM_001098199	RefSeq	Homo sapiens G protein-coupled receptor 1 (GPR1), transcript variant 2, mRNA.	FALSE	chr2	GO:0007186 // GO:0007165 // GO:0007186	G-protein coupled receptor signaling pathway // signal transduction // G-protein coupled receptor signaling pathway	GO:0005887 // GO:0005886 // GO:0016020 // GO:0016021	integral component of plasma membrane // plasma membrane // membrane // integral component of membrane	GO:0004930 // GO:0004871 // GO:0004930	G-protein coupled receptor activity // signal transducer activity // G-protein coupled receptor activity	GenMAPP	GPCRDB_Class_A_Rhodopsin-like	chrNA:-1--1	TC02002698.hg.1	4.44255	4.13828	4.55835	4.07551	4.25339	4.27256	4.50085	4.5391	4.65117	5.67102	6.01924	5.98913	4.48722	4.58987	4.5531	4.82308	4.47473	4.60029
192	TC02002726.hg.1	IDH1	NM_005896	RefSeq	Homo sapiens isocitrate dehydrogenase 1 (NADP+), soluble (IDH1), transcript variant 1, mRNA.	FALSE	chr2	GO:0006097 // GO:0006099 // GO:0006102 // GO:0006103 // GO:0006103 // GO:0006740 // GO:0006749 // GO:0006979 // GO:0008585 // GO:0044255 // GO:0044281 // GO:0048545 // GO:0006102 // GO:0014070 // GO:0055114	glyoxylate cycle // tricarboxylic acid cycle // isocitrate metabolic process // 2-oxoglutarate metabolic process // 2-oxoglutarate metabolic process // NADPH regeneration // glutathione metabolic process // response to oxidative stress // female gonad development // cellular lipid metabolic process // small molecule metabolic process // response to steroid hormone // isocitrate metabolic process …	GO:0005737 // GO:0005739 // GO:0005777 // GO:0005782 // GO:0005829 // GO:0005829 // GO:0070062 // GO:0005737 // GO:0005777 // GO:0005829	cytoplasm // mitochondrion // peroxisome // peroxisomal matrix // cytosol // cytosol // extracellular vesicular exosome // cytoplasm // peroxisome // cytosol	GO:0000287 // GO:0004450 // GO:0004450 // GO:0005102 // GO:0042803 // GO:0050661 // GO:0051287 // GO:0000287 // GO:0004450 // GO:0004450 // GO:0016491 // GO:0016616 // GO:0046872	magnesium ion binding // isocitrate dehydrogenase (NADP+) activity // isocitrate dehydrogenase (NADP+) activity // receptor binding // protein homodimerization activity // NADP binding // NAD binding // magnesium ion binding // isocitrate dehydrogenase (NADP+) activity // isocitrate dehydrogenase (NADP+) activity // oxidoreductase activity // oxidoreductase activity, acting on the CH-OH group of …	HumanCyc // HumanCyc // HumanCyc	FERMENTATION-PWY // ANARESP1-PWY // TCA	chrNA:-1--1	TC02002726.hg.1	8.73402	8.95271	8.38612	8.30682	7.90845	8.277	10.5192	11.1097	11.2121	11.5819	12.0952	12.4126	11.0302	11.0187	11.1026	11.8834	12.4598	12.4704
193	TC02002745.hg.1	BARD1	NM_000465	RefSeq	Homo sapiens BRCA1 associated RING domain 1 (BARD1), transcript variant 1, mRNA.	FALSE	chr2	GO:0001894 // GO:0006281 // GO:0006974 // GO:0007050 // GO:0016567 // GO:0031441 // GO:0042325 // GO:0043065 // GO:0043066 // GO:0045732 // GO:0046826 // GO:0085020 // GO:0006974 // GO:0016567	tissue homeostasis // DNA repair // cellular response to DNA damage stimulus // cell cycle arrest // protein ubiquitination // negative regulation of mRNA 3'-end processing // regulation of phosphorylation // positive regulation of apoptotic process // negative regulation of apoptotic process // positive regulation of protein catabolic process // negative regulation of protein export from nucleus…	GO:0000151 // GO:0005634 // GO:0005634 // GO:0005730 // GO:0005737 // GO:0031436 // GO:0043231 // GO:0070531 // GO:0005634	ubiquitin ligase complex // nucleus // nucleus // nucleolus // cytoplasm // BRCA1-BARD1 complex // intracellular membrane-bounded organelle // BRCA1-A complex // nucleus	GO:0003723 // GO:0004842 // GO:0004842 // GO:0005515 // GO:0008270 // GO:0016874 // GO:0019900 // GO:0042803 // GO:0046982 // GO:0046872	RNA binding // ubiquitin-protein transferase activity // ubiquitin-protein transferase activity // protein binding // zinc ion binding // ligase activity // kinase binding // protein homodimerization activity // protein heterodimerization activity // metal ion binding	---	---	chrNA:-1--1	TC02002745.hg.1	8.77172	8.80261	8.47588	8.22221	8.31447	8.17828	9.61427	9.05452	9.00203	8.58088	8.68675	8.98351	9.44418	9.44138	9.40277	6.94517	7.52325	7.89825
194	TC02002747.hg.1	FN1	NM_002026	RefSeq	Homo sapiens fibronectin 1 (FN1), transcript variant 3, mRNA.	FALSE	chr2	GO:0001525 // GO:0002576 // GO:0006953 // GO:0007044 // GO:0007155 // GO:0007161 // GO:0007596 // GO:0008360 // GO:0009611 // GO:0010952 // GO:0018149 // GO:0022617 // GO:0030168 // GO:0030198 // GO:0034446 // GO:0050900 // GO:0007155 // GO:0007160 // GO:0042060	angiogenesis // platelet degranulation // acute-phase response // cell-substrate junction assembly // cell adhesion // calcium-independent cell-matrix adhesion // blood coagulation // regulation of cell shape // response to wounding // positive regulation of peptidase activity // peptide cross-linking // extracellular matrix disassembly // platelet activation // extracellular matrix organization …	GO:0005576 // GO:0005576 // GO:0005577 // GO:0005604 // GO:0005615 // GO:0005793 // GO:0016324 // GO:0031012 // GO:0031012 // GO:0031093 // GO:0070062 // GO:0072562 // GO:0005576 // GO:0005578 // GO:0031012	extracellular region // extracellular region // fibrinogen complex // basement membrane // extracellular space // endoplasmic reticulum-Golgi intermediate compartment // apical plasma membrane // extracellular matrix // extracellular matrix // platelet alpha granule lumen // extracellular vesicular exosome // blood microparticle // extracellular region // proteinaceous extracellular matrix // ext…	GO:0002020 // GO:0005178 // GO:0005515 // GO:0005518 // GO:0008201 // GO:0016504 // GO:0008201	protease binding // integrin binding // protein binding // collagen binding // heparin binding // peptidase activator activity // heparin binding	GenMAPP	Inflammatory_Response_Pathway	chrNA:-1--1	TC02002747.hg.1	13.9736	14.6439	14.644	13.1585	12.6107	12.7883	10.3198	10.1366	10.435	10.4617	10.2009	10.836	10.7235	10.8917	10.9644	9.89578	10.0676	9.88014
195	TC02002758.hg.1	IGFBP5	NM_000599	RefSeq	Homo sapiens insulin-like growth factor binding protein 5 (IGFBP5), mRNA.	FALSE	chr2	GO:0001558 // GO:0001649 // GO:0006006 // GO:0007165 // GO:0010906 // GO:0014912 // GO:0017148 // GO:0030336 // GO:0031069 // GO:0035556 // GO:0042593 // GO:0043568 // GO:0043569 // GO:0044267 // GO:0044342 // GO:0045668 // GO:0048630 // GO:0048662 // GO:0051146 // GO:0051897 // GO:0060056 // GO:0071320 // GO:0071407 // GO:0040008 // GO:0043569	regulation of cell growth // osteoblast differentiation // glucose metabolic process // signal transduction // regulation of glucose metabolic process // negative regulation of smooth muscle cell migration // negative regulation of translation // negative regulation of cell migration // hair follicle morphogenesis // intracellular signal transduction // glucose homeostasis // positive regulation …	GO:0005576 // GO:0005576 // GO:0016942 // GO:0005576	extracellular region // extracellular region // insulin-like growth factor binding protein complex // extracellular region	GO:0001968 // GO:0005515 // GO:0031994 // GO:0005520 // GO:0019838	fibronectin binding // protein binding // insulin-like growth factor I binding // insulin-like growth factor binding // growth factor binding	---	---	chrNA:-1--1	TC02002758.hg.1	4.50212	4.34307	4.55745	4.44076	4.44723	4.40998	12.0247	12.0162	12.0276	9.25925	8.64856	9.07931	4.9313	4.81553	4.83333	5.00778	4.51659	4.43492
196	TC02002773.hg.1	USP37	NM_020935	RefSeq	Homo sapiens ubiquitin specific peptidase 37 (USP37), mRNA.	FALSE	chr2	GO:0000082 // GO:0006511 // GO:0007067 // GO:0016579 // GO:0035871 // GO:0071108 // GO:0006508 // GO:0007049 // GO:0051301	G1/S transition of mitotic cell cycle // ubiquitin-dependent protein catabolic process // mitotic nuclear division // protein deubiquitination // protein K11-linked deubiquitination // protein K48-linked deubiquitination // proteolysis // cell cycle // cell division	GO:0005634	nucleus	GO:0004197 // GO:0004843 // GO:0005515 // GO:0019901 // GO:0008233 // GO:0008234 // GO:0016787 // GO:0036459	cysteine-type endopeptidase activity // ubiquitin-specific protease activity // protein binding // protein kinase binding // peptidase activity // cysteine-type peptidase activity // hydrolase activity // ubiquitinyl hydrolase activity	---	---	chrNA:-1--1	TC02002773.hg.1	7.71427	7.94416	7.93755	7.91274	7.66325	8.05514	7.5521	7.31408	7.5158	7.68633	7.88675	8.06409	8.83395	8.70323	8.76627	7.14039	7.57622	7.74767
197	TC02002808.hg.1	EPHA4	NM_004438	RefSeq	Homo sapiens EPH receptor A4 (EPHA4), mRNA.	FALSE	chr2	GO:0007155 // GO:0007628 // GO:0008045 // GO:0008347 // GO:0018108 // GO:0021957 // GO:0032314 // GO:0032317 // GO:0043507 // GO:0046777 // GO:0048013 // GO:0048681 // GO:0048710 // GO:0050770 // GO:0050775 // GO:0061001 // GO:0097155 // GO:0097156 // GO:2001108 // GO:0006468 // GO:0007169 // GO:0007275 // GO:0007399 // GO:0007411 // GO:0008045 // GO:0016310 // GO:0021957 // GO:0032314 // GO:0032…	cell adhesion // adult walking behavior // motor neuron axon guidance // glial cell migration // peptidyl-tyrosine phosphorylation // corticospinal tract morphogenesis // regulation of Rac GTPase activity // regulation of Rap GTPase activity // positive regulation of JUN kinase activity // protein autophosphorylation // ephrin receptor signaling pathway // negative regulation of axon regeneration…	GO:0005737 // GO:0005741 // GO:0005783 // GO:0005794 // GO:0005887 // GO:0009986 // GO:0014069 // GO:0030054 // GO:0030175 // GO:0030424 // GO:0030425 // GO:0031594 // GO:0031901 // GO:0043197 // GO:0043204 // GO:0043679 // GO:0044295 // GO:0045211 // GO:0005737 // GO:0005768 // GO:0005769 // GO:0005886 // GO:0005887 // GO:0016020 // GO:0016021 // GO:0030424 // GO:0030425 // GO:0031901 // GO:0042…	cytoplasm // mitochondrial outer membrane // endoplasmic reticulum // Golgi apparatus // integral component of plasma membrane // cell surface // postsynaptic density // cell junction // filopodium // axon // dendrite // neuromuscular junction // early endosome membrane // dendritic spine // perikaryon // axon terminus // axonal growth cone // postsynaptic membrane // cytoplasm // endosome // ear…	GO:0004672 // GO:0005004 // GO:0005005 // GO:0005515 // GO:0005524 // GO:0042731 // GO:0042802 // GO:0046875 // GO:0097161 // GO:0000166 // GO:0004672 // GO:0004713 // GO:0004714 // GO:0005003 // GO:0005004 // GO:0005005 // GO:0016301 // GO:0016740 // GO:0016772	protein kinase activity // GPI-linked ephrin receptor activity // transmembrane-ephrin receptor activity // protein binding // ATP binding // PH domain binding // identical protein binding // ephrin receptor binding // DH domain binding // nucleotide binding // protein kinase activity // protein tyrosine kinase activity // transmembrane receptor protein tyrosine kinase activity // ephrin receptor…	---	---	chrNA:-1--1	TC02002808.hg.1	7.26003	7.46814	7.47695	6.46981	6.38921	6.25845	8.01849	8.66456	8.43143	7.59412	7.9336	8.36216	7.20483	6.99889	7.46486	7.21735	7.61519	7.49058
198	TC02002813.hg.1	FARSB	NM_005687	RefSeq	Homo sapiens phenylalanyl-tRNA synthetase, beta subunit (FARSB), mRNA.	FALSE	chr2	GO:0006412 // GO:0006418 // GO:0006432 // GO:0010467 // GO:0006412	translation // tRNA aminoacylation for protein translation // phenylalanyl-tRNA aminoacylation // gene expression // translation	GO:0005737 // GO:0005829 // GO:0005737 // GO:0016020	cytoplasm // cytosol // cytoplasm // membrane	GO:0000287 // GO:0003723 // GO:0004826 // GO:0005524 // GO:0000166 // GO:0004812 // GO:0004826 // GO:0016874	magnesium ion binding // RNA binding // phenylalanine-tRNA ligase activity // ATP binding // nucleotide binding // aminoacyl-tRNA ligase activity // phenylalanine-tRNA ligase activity // ligase activity	HumanCyc	TRNA-CHARGING-PWY	chrNA:-1--1	TC02002813.hg.1	8.74519	8.72485	8.70723	9.24595	9.31117	9.56407	9.53306	9.00971	8.81815	8.46897	7.82379	8.11622	11.1873	11.2852	10.7222	10.1614	9.67404	9.89829
199	TC02002827.hg.1	DOCK10	NM_014689	RefSeq	Homo sapiens dedicator of cytokinesis 10 (DOCK10), transcript variant DOCK10.1, mRNA.	FALSE	chr2	GO:0007264 // GO:0030334 // GO:0032319 // GO:0032321 // GO:0043547	small GTPase mediated signal transduction // regulation of cell migration // regulation of Rho GTPase activity // positive regulation of Rho GTPase activity // positive regulation of GTPase activity	GO:0070062 // GO:0016020	extracellular vesicular exosome // membrane	GO:0005089 // GO:0017048 // GO:0003674 // GO:0005085	Rho guanyl-nucleotide exchange factor activity // Rho GTPase binding // molecular_function // guanyl-nucleotide exchange factor activity	---	---	chrNA:-1--1	TC02002827.hg.1	7.83777	8.30092	8.10794	8.57354	8.53602	8.64496	7.0222	7.00924	7.04765	6.91822	6.78278	7.30677	7.61953	7.57327	7.56447	6.08229	6.11289	6.13104
200	TC02002847.hg.1	DNER	NM_139072	RefSeq	Homo sapiens delta/notch-like EGF repeat containing (DNER), mRNA.	FALSE	chr2	GO:0001764 // GO:0006897 // GO:0007219 // GO:0007220 // GO:0007416 // GO:0007417 // GO:0010001 // GO:0048741 // GO:0007219	neuron migration // endocytosis // Notch signaling pathway // Notch receptor processing // synapse assembly // central nervous system development // glial cell differentiation // skeletal muscle fiber development // Notch signaling pathway	GO:0005769 // GO:0005886 // GO:0016021 // GO:0030425 // GO:0043025 // GO:0005886 // GO:0016020 // GO:0030425	early endosome // plasma membrane // integral component of membrane // dendrite // neuronal cell body // plasma membrane // membrane // dendrite	GO:0004888 // GO:0005112 // GO:0005509 // GO:0005515 // GO:0030276 // GO:0005509	transmembrane signaling receptor activity // Notch binding // calcium ion binding // protein binding // clathrin binding // calcium ion binding	---	---	chrNA:-1--1	TC02002847.hg.1	7.36744	7.65903	7.36507	8.52567	8.54655	8.78076	5.50243	5.55961	5.7599	5.82853	6.38258	6.13665	5.45783	5.6758	5.41412	5.73868	5.49063	5.51835
201	TC02002886.hg.1	HJURP	NM_018410	RefSeq	Homo sapiens Holliday junction recognition protein (HJURP), transcript variant 1, mRNA.	FALSE	chr2	GO:0006334 // GO:0007049 // GO:0007059 // GO:0034080 // GO:0034080 // GO:0043254 // GO:0051101	nucleosome assembly // cell cycle // chromosome segregation // centromere-specific nucleosome assembly // centromere-specific nucleosome assembly // regulation of protein complex assembly // regulation of DNA binding	GO:0000775 // GO:0000777 // GO:0005634 // GO:0005654 // GO:0005730 // GO:0005737 // GO:0000775 // GO:0005634 // GO:0005694 // GO:0005730	chromosome, centromeric region // condensed chromosome kinetochore // nucleus // nucleoplasm // nucleolus // cytoplasm // chromosome, centromeric region // nucleus // chromosome // nucleolus	GO:0003677 // GO:0005515 // GO:0042393 // GO:0042393 // GO:0042802	DNA binding // protein binding // histone binding // histone binding // identical protein binding	---	---	chrNA:-1--1	TC02002886.hg.1	9.16187	9.58294	9.21978	8.98098	9.05697	9.16541	10.3782	10.2726	10.0571	10.4391	10.2121	10.8397	10.2005	10.2618	10.0862	6.98598	7.08536	7.32559
202	TC02002949.hg.1	HDLBP	BX648235	GenBank HTC	Homo sapiens mRNA; cDNA DKFZp686L08115 (from clone DKFZp686L08115).	FALSE	chr2	GO:0006869 // GO:0008203 // GO:0006629 // GO:0006810 // GO:0008202 // GO:0008203	lipid transport // cholesterol metabolic process // lipid metabolic process // transport // steroid metabolic process // cholesterol metabolic process	GO:0005634 // GO:0005737 // GO:0005886 // GO:0034364 // GO:0005737	nucleus // cytoplasm // plasma membrane // high-density lipoprotein particle // cytoplasm	GO:0008289 // GO:0044822 // GO:0003723 // GO:0005515	lipid binding // poly(A) RNA binding // RNA binding // protein binding	---	---	chrNA:-1--1	TC02002949.hg.1	6.04978	6.19562	5.72129	7.3111	7.32391	7.3126	6.0788	6.16299	6.13305	5.98608	5.79793	5.76806	6.48733	6.71926	6.61591	6.0073	6.98576	6.45767
203	TC02002954.hg.1	DTYMK	NM_001165031	RefSeq	Homo sapiens deoxythymidylate kinase (thymidylate kinase) (DTYMK), transcript variant 2, mRNA.	FALSE	chr2	GO:0006233 // GO:0006235 // GO:0007049 // GO:0008283 // GO:0015949 // GO:0043627 // GO:0044281 // GO:0045445 // GO:0046686 // GO:0046939 // GO:0046939 // GO:0046939 // GO:0046940 // GO:0055086 // GO:0071363 // GO:0009165 // GO:0016310 // GO:0046940	dTDP biosynthetic process // dTTP biosynthetic process // cell cycle // cell proliferation // nucleobase-containing small molecule interconversion // response to estrogen // small molecule metabolic process // myoblast differentiation // response to cadmium ion // nucleotide phosphorylation // nucleotide phosphorylation // nucleotide phosphorylation // nucleoside monophosphate phosphorylation // …	GO:0005758 // GO:0005759 // GO:0005829 // GO:0005739	mitochondrial intermembrane space // mitochondrial matrix // cytosol // mitochondrion	GO:0004798 // GO:0005524 // GO:0050145 // GO:0000166 // GO:0004798 // GO:0004798 // GO:0016301 // GO:0016740 // GO:0050145	thymidylate kinase activity // ATP binding // nucleoside phosphate kinase activity // nucleotide binding // thymidylate kinase activity // thymidylate kinase activity // kinase activity // transferase activity // nucleoside phosphate kinase activity	---	---	chrNA:-1--1	TC02002954.hg.1	11.1088	11.395	11.0613	11.1344	11.329	11.3791	10.669	10.3538	10.2471	10.0906	9.94666	10.1961	11.8532	11.8835	11.9242	10.5504	10.3489	10.3918
204	TC02003219.hg.1	MSH2	DQ648894	NONCODE	accn=DQ648894 class=mRNAlike lncRNA name=NULL ref=H-invitational v7.5 transcriptId=HIT000393012 cpcScore=1.5889600 cnci=-0.1889403	FALSE	chr2	GO:0000710 // GO:0001701 // GO:0006119 // GO:0006200 // GO:0006200 // GO:0006200 // GO:0006281 // GO:0006298 // GO:0006298 // GO:0006301 // GO:0006302 // GO:0006311 // GO:0007050 // GO:0007281 // GO:0008340 // GO:0008584 // GO:0010165 // GO:0010165 // GO:0010224 // GO:0010224 // GO:0016446 // GO:0016447 // GO:0019724 // GO:0030183 // GO:0031573 // GO:0042771 // GO:0043524 // GO:0043570 // GO:0045…	meiotic mismatch repair // in utero embryonic development // oxidative phosphorylation // ATP catabolic process // ATP catabolic process // ATP catabolic process // DNA repair // mismatch repair // mismatch repair // postreplication repair // double-strand break repair // meiotic gene conversion // cell cycle arrest // germ cell development // determination of adult lifespan // male gonad develop…	GO:0000228 // GO:0032301 // GO:0032302 // GO:0000228 // GO:0005634 // GO:0016020 // GO:0032301 // GO:0032302	nuclear chromosome // MutSalpha complex // MutSbeta complex // nuclear chromosome // nucleus // membrane // MutSalpha complex // MutSbeta complex	GO:0000287 // GO:0000400 // GO:0000403 // GO:0000404 // GO:0000406 // GO:0003677 // GO:0003690 // GO:0003697 // GO:0005515 // GO:0005524 // GO:0008022 // GO:0008094 // GO:0016887 // GO:0019237 // GO:0019899 // GO:0019901 // GO:0030983 // GO:0032137 // GO:0032137 // GO:0032139 // GO:0032142 // GO:0032143 // GO:0032181 // GO:0032357 // GO:0032405 // GO:0042803 // GO:0043531 // GO:0005524 // GO:0030…	magnesium ion binding // four-way junction DNA binding // Y-form DNA binding // heteroduplex DNA loop binding // double-strand/single-strand DNA junction binding // DNA binding // double-stranded DNA binding // single-stranded DNA binding // protein binding // ATP binding // protein C-terminus binding // DNA-dependent ATPase activity // ATPase activity // centromeric DNA binding // enzyme binding…	---	---	chrNA:-1--1	TC02003219.hg.1	8.58544	8.80179	9.03443	8.64227	8.47092	8.77531	9.05387	9.10872	8.91255	8.81978	9.11163	9.29796	9.61522	9.20978	9.29268	7.60726	7.03935	7.51295
205	TC02003335.hg.1	MTHFD2	NR_027405	NONCODE	accn=NR_027405 class=lncRNA name= ref=RefGeneNoncode transcriptId=NR_027405 cpcScore=4.8437300 cnci=-0.2488486	FALSE	chr2	GO:0006730 // GO:0009396 // GO:0046653 // GO:0055114 // GO:0006730 // GO:0006730 // GO:0008152	one-carbon metabolic process // folic acid-containing compound biosynthetic process // tetrahydrofolate metabolic process // oxidation-reduction process // one-carbon metabolic process // one-carbon metabolic process // metabolic process	GO:0005615 // GO:0005739 // GO:0005739 // GO:0005829 // GO:0005739 // GO:0005739 // GO:0005829	extracellular space // mitochondrion // mitochondrion // cytosol // mitochondrion // mitochondrion // cytosol	GO:0000287 // GO:0004329 // GO:0004477 // GO:0004477 // GO:0004487 // GO:0004488 // GO:0042301 // GO:0003824 // GO:0004329 // GO:0004477 // GO:0004477 // GO:0004487 // GO:0004488 // GO:0016491 // GO:0016787	magnesium ion binding // formate-tetrahydrofolate ligase activity // methenyltetrahydrofolate cyclohydrolase activity // methenyltetrahydrofolate cyclohydrolase activity // methylenetetrahydrofolate dehydrogenase (NAD+) activity // methylenetetrahydrofolate dehydrogenase (NADP+) activity // phosphate ion binding // catalytic activity // formate-tetrahydrofolate ligase activity // methenyltetrahyd…	GenMAPP	Nucleotide_Metabolism	chrNA:-1--1	TC02003335.hg.1	8.39654	8.53543	8.3787	9.40268	9.47551	9.72035	7.4686	7.23831	7.55829	7.36599	7.92904	8.17122	9.0655	8.95618	9.26031	8.3177	9.39541	9.64081
206	TC02003382.hg.1	LINC00152//MIR4435-1HG	ENST00000331944	NONCODE	accn=NULL class=lncRNA name= ref=EnsemblNoncode transcriptId=ENST00000331944 cpcScore=-0.8784160 cnci=-0.1438024 gene:ENSG00000222041	FALSE	chr2	---	---	---	---	---	---	---	---	chrNA:-1--1	TC02003382.hg.1	12.6001	12.7658	12.9174	13.8847	14.1145	13.9022	12.786	12.5342	12.4802	11.463	11.4073	11.5516	13.0351	13.1596	13.0678	12.2415	12.7012	12.4007
207	TC02003637.hg.1	---	uc010fnw.1	NONCODE	accn=NULL class=lncRNA name= ref=UCSCGeneNoncode transcriptId=uc010fnw.1 cpcScore=-1.4139600 cnci=-0.4707753	FALSE	chr2	---	---	---	---	---	---	---	---	chrNA:-1--1	TC02003637.hg.1	10.2345	10.529	10.1074	9.88446	10.3093	9.8658	10.2993	10.1122	9.39368	10.0291	11.4442	11.368	9.83631	9.70232	9.81141	8.52878	8.77858	8.66827
208	TC02003743.hg.1	COL3A1	M59227	NONCODE	accn=M59227 class=mRNAlike lncRNA name=NULL ref=H-invitational v7.5 transcriptId=HIT000195889 cpcScore=0.4459480 cnci=-0.1642215	FALSE	chr2	GO:0001501 // GO:0001568 // GO:0007160 // GO:0007179 // GO:0007229 // GO:0007411 // GO:0007507 // GO:0007568 // GO:0009314 // GO:0009612 // GO:0018149 // GO:0021987 // GO:0022617 // GO:0030168 // GO:0030198 // GO:0030199 // GO:0030199 // GO:0030574 // GO:0034097 // GO:0035025 // GO:0042060 // GO:0042060 // GO:0043206 // GO:0043588 // GO:0048565 // GO:0050777 // GO:0071230 // GO:2001223 // GO:0021…	skeletal system development // blood vessel development // cell-matrix adhesion // transforming growth factor beta receptor signaling pathway // integrin-mediated signaling pathway // axon guidance // heart development // aging // response to radiation // response to mechanical stimulus // peptide cross-linking // cerebral cortex development // extracellular matrix disassembly // platelet activat…	GO:0005576 // GO:0005586 // GO:0005586 // GO:0005615 // GO:0005615 // GO:0005788 // GO:0031012 // GO:0031012 // GO:0005576 // GO:0005578 // GO:0005581 // GO:0005586 // GO:0031012	extracellular region // collagen type III trimer // collagen type III trimer // extracellular space // extracellular space // endoplasmic reticulum lumen // extracellular matrix // extracellular matrix // extracellular region // proteinaceous extracellular matrix // collagen trimer // collagen type III trimer // extracellular matrix	GO:0005178 // GO:0005178 // GO:0005201 // GO:0005515 // GO:0046332 // GO:0046872 // GO:0048407 // GO:0005201	integrin binding // integrin binding // extracellular matrix structural constituent // protein binding // SMAD binding // metal ion binding // platelet-derived growth factor binding // extracellular matrix structural constituent	GenMAPP	Inflammatory_Response_Pathway	chrNA:-1--1	TC02003743.hg.1	6.20886	5.93157	6.42664	5.99417	5.96936	5.79907	10.4305	10.9858	10.8221	8.13511	8.33727	8.44406	6.08546	6.2952	6.20216	6.96717	6.17595	5.9044
209	TC02003744.hg.1	COL3A1	X01655	NONCODE	accn=X01655 class=mRNAlike lncRNA name=NULL ref=H-invitational v7.5 transcriptId=HIT000320903 cpcScore=1.4078400 cnci=-0.1493732	FALSE	chr2	GO:0001501 // GO:0001568 // GO:0007160 // GO:0007179 // GO:0007229 // GO:0007411 // GO:0007507 // GO:0007568 // GO:0009314 // GO:0009612 // GO:0018149 // GO:0021987 // GO:0022617 // GO:0030168 // GO:0030198 // GO:0030199 // GO:0030199 // GO:0030574 // GO:0034097 // GO:0035025 // GO:0042060 // GO:0042060 // GO:0043206 // GO:0043588 // GO:0048565 // GO:0050777 // GO:0071230 // GO:2001223 // GO:0021…	skeletal system development // blood vessel development // cell-matrix adhesion // transforming growth factor beta receptor signaling pathway // integrin-mediated signaling pathway // axon guidance // heart development // aging // response to radiation // response to mechanical stimulus // peptide cross-linking // cerebral cortex development // extracellular matrix disassembly // platelet activat…	GO:0005576 // GO:0005586 // GO:0005586 // GO:0005615 // GO:0005615 // GO:0005788 // GO:0031012 // GO:0031012 // GO:0005576 // GO:0005578 // GO:0005581 // GO:0005586 // GO:0031012	extracellular region // collagen type III trimer // collagen type III trimer // extracellular space // extracellular space // endoplasmic reticulum lumen // extracellular matrix // extracellular matrix // extracellular region // proteinaceous extracellular matrix // collagen trimer // collagen type III trimer // extracellular matrix	GO:0005178 // GO:0005178 // GO:0005201 // GO:0005515 // GO:0046332 // GO:0046872 // GO:0048407 // GO:0005201	integrin binding // integrin binding // extracellular matrix structural constituent // protein binding // SMAD binding // metal ion binding // platelet-derived growth factor binding // extracellular matrix structural constituent	GenMAPP	Inflammatory_Response_Pathway	chrNA:-1--1	TC02003744.hg.1	6.15094	6.09212	6.21188	6.12106	6.00258	5.88749	12.2596	12.6113	12.6006	9.13179	9.60922	10.2504	5.93976	6.22133	6.23173	6.60586	5.85202	6.04678
210	TC02003747.hg.1	---	NR_024415	NONCODE	accn=NR_024415 class=lncRNA name= ref=RefGeneNoncode transcriptId=NR_024415 cpcScore=2.3855700 cnci=-0.3764815	FALSE	chr2	---	---	---	---	---	---	---	---	chrNA:-1--1	TC02003747.hg.1	11.6757	12.7727	12.1465	13.5818	13.4202	13.647	12.4049	12.014	12.2616	11.3651	11.6407	12.1319	10.9391	10.8574	11.4249	12.3404	12.6282	12.6478
211	TC02003748.hg.1	---	linc_luo_1056	NONCODE	accn=NULL class=lincRNA name=Human lincRNA ref=Scripture Reconstruction LincRNAs By Luo transcriptId=linc_luo_1056 cpcScore=-1.6319900 cnci=-0.3783258	FALSE	chr2	---	---	---	---	---	---	---	---	chrNA:-1--1	TC02003748.hg.1	6.71357	6.6531	6.35661	7.35041	7.16463	7.38259	5.40641	5.32388	5.41196	5.38905	5.32934	5.59485	4.97496	4.97595	5.00477	5.98134	6.17676	5.9158
212	TC02003749.hg.1	---	TCONS_00003974-XLOC_001788	Rinn lincRNA	linc-SLC39A10-10 chr2:+:192559981-192563100	FALSE	chr2	---	---	---	---	---	---	---	---	chrNA:-1--1	TC02003749.hg.1	8.85183	9.18567	9.03893	9.87111	10.0604	9.87434	8.25674	8.28373	8.01304	7.67721	7.96464	7.94595	6.53749	7.13373	6.77689	9.25847	9.27626	9.53112
213	TC02003784.hg.1	---	TCONS_00003084-XLOC_001822	Rinn lincRNA	linc-CPO-2 chr2:+:207731518-207733013	FALSE	chr2	---	---	---	---	---	---	---	---	chrNA:-1--1	TC02003784.hg.1	4.54228	4.30964	4.51165	8.29141	7.39727	8.37287	4.20014	4.34045	4.26351	5.21693	5.23083	5.38289	4.4108	4.69549	4.6682	6.06851	4.78135	5.67601
214	TC02003785.hg.1	---	TCONS_00003998-XLOC_001823	Rinn lincRNA	linc-CPO-1 chr2:+:207744135-207799719	FALSE	chr2	---	---	---	---	---	---	---	---	chrNA:-1--1	TC02003785.hg.1	5.16765	4.67479	4.98004	7.30994	6.76235	7.01391	4.78235	4.92806	4.8251	4.87354	5.50311	5.62925	5.13473	4.98279	4.86043	5.39534	5.1135	5.14245
215	TC02003815.hg.1	---	linc_luo_1117	NONCODE	accn=NULL class=lincRNA name=Human lincRNA ref=Scripture Reconstruction LincRNAs By Luo transcriptId=linc_luo_1117 cpcScore=-1.3257300 cnci=-0.2942127	FALSE	chr2	---	---	---	---	---	---	---	---	chrNA:-1--1	TC02003815.hg.1	8.21796	8.48255	8.03062	7.05002	6.8185	6.84645	6.06013	6.45983	6.49326	5.97274	6.00676	5.93923	7.01176	7.10531	7.32259	6.10848	6.52062	6.42959
216	TC02003817.hg.1	PKI55	AK125369	NONCODE	accn=AK125369 class=mRNAlike lncRNA name=Human lncRNA ref=JounralRNA transcriptId=1559 cpcScore=4.8054700 cnci=-0.2810112	FALSE	chr2	---	---	---	---	---	---	---	---	chrNA:-1--1	TC02003817.hg.1	11.1334	11.0288	10.7058	9.42044	9.06925	9.32966	7.99824	8.42469	8.17908	7.48175	8.6335	7.98975	9.89573	9.43892	9.7657	8.65449	9.00209	8.8147
217	TC02003819.hg.1	---	linc_luo_1118	NONCODE	accn=NULL class=lincRNA name=Human lincRNA ref=Scripture Reconstruction LincRNAs By Luo transcriptId=linc_luo_1118 cpcScore=-1.4120400 cnci=-0.4092129	FALSE	chr2	---	---	---	---	---	---	---	---	chrNA:-1--1	TC02003819.hg.1	4.93756	4.80194	4.62832	5.73739	5.73569	5.67784	4.93946	4.66143	4.64264	4.68262	4.70057	4.86307	5.66281	5.65975	5.45095	6.30197	6.59433	6.24801
218	TC02003837.hg.1	STK16	NR_026909	NONCODE	accn=NR_026909 class=lncRNA name= ref=RefGeneNoncode transcriptId=NR_026909 cpcScore=3.5553500 cnci=-0.2239783	FALSE	chr2	GO:0018108 // GO:0045944 // GO:0046777 // GO:0071560 // GO:0006468 // GO:0016310 // GO:0046777	peptidyl-tyrosine phosphorylation // positive regulation of transcription from RNA polymerase II promoter // protein autophosphorylation // cellular response to transforming growth factor beta stimulus // protein phosphorylation // phosphorylation // protein autophosphorylation	GO:0005798 // GO:0016020 // GO:0048471 // GO:0005737	Golgi-associated vesicle // membrane // perinuclear region of cytoplasm // cytoplasm	GO:0001077 // GO:0004674 // GO:0004715 // GO:0005515 // GO:0005524 // GO:0000166 // GO:0004672 // GO:0016301 // GO:0016740 // GO:0016772	RNA polymerase II core promoter proximal region sequence-specific DNA binding transcription factor activity involved in positive regulation of transcription // protein serine/threonine kinase activity // non-membrane spanning protein tyrosine kinase activity // protein binding // ATP binding // nucleotide binding // protein kinase activity // kinase activity // transferase activity // transferase…	---	---	chrNA:-1--1	TC02003837.hg.1	6.95653	6.95449	7.3466	7.26068	7.27719	7.64334	7.50857	7.49545	7.78585	8.67185	8.26604	8.56506	8.45433	7.97714	7.86731	9.45091	9.67318	10.0048
219	TC02003886.hg.1	PTMA	BC022433	NONCODE	accn=BC022433 class=mRNAlike lncRNA name=Human lncRNA ref=JounralRNA transcriptId=4960 cpcScore=1.5583300 cnci=-0.2893538	FALSE	chr2	GO:0006351	transcription, DNA-templated	GO:0005634 // GO:0070062 // GO:0005634	nucleus // extracellular vesicular exosome // nucleus	---	---	---	---	chrNA:-1--1	TC02003886.hg.1	15.3732	16.1662	16.2645	15.6517	15.0418	15.9429	16.1673	15.929	15.8897	15.8113	15.0588	15.5924	17.4844	17.3836	17.2727	16.0218	16.2802	16.2351
220	TC02004404.hg.1	---	TCONS_00004331-XLOC_002204	Rinn lincRNA	linc-EIF2AK3-7 chr2:-:92176818-92179491	FALSE	chr2	---	---	---	---	---	---	---	---	chrNA:-1--1	TC02004404.hg.1	5.08764	5.16448	5.2693	6.29536	6.23029	6.17205	5.67574	5.21722	4.62425	5.02859	4.45461	5.06306	4.9704	4.93296	5.23921	5.62527	4.39338	5.04279
221	TC02004505.hg.1	AC017002.2	OTTHUMT00000332148	NONCODE	accn=NULL class=mRNAlike lncRNA name=vega lncRNA ref=GENCODE transcriptId=OTTHUMT00000332148 cpcScore=-1.2024900 cnci=-0.3547261 gene:OTTHUMG00000153694	FALSE	chr2	---	---	---	---	---	---	---	---	chrNA:-1--1	TC02004505.hg.1	8.19485	8.33333	8.27976	9.18053	9.23677	9.2412	8.05011	7.68134	7.72128	7.44105	7.23558	7.33228	7.52316	7.64056	7.63435	7.02846	7.34814	7.15406
222	TC02004580.hg.1	---	TCONS_l2_00014894-XLOC_l2_008260	Broad TUCP	linc-TUBA3E chr2:-:130970621-130970942	FALSE	chr2	---	---	---	---	---	---	---	---	chrNA:-1--1	TC02004580.hg.1	8.64605	8.35003	8.56431	9.68193	9.56587	9.62417	9.31604	8.61148	9.14455	10.0969	9.94136	9.69037	9.07648	8.7201	8.72595	8.73314	8.06011	8.81382
223	TC02004689.hg.1	METTL8	AK023396	NONCODE	accn=AK023396 class=mRNAlike lncRNA name=Human lncRNA ref=JounralRNA transcriptId=1435 cpcScore=-1.2180400 cnci=-0.3453010	FALSE	chr2	GO:0032259 // GO:0007519 // GO:0016573 // GO:0045444	methylation // skeletal muscle tissue development // histone acetylation // fat cell differentiation	GO:0005634 // GO:0005737	nucleus // cytoplasm	GO:0008168 // GO:0016740 // GO:0004402	methyltransferase activity // transferase activity // histone acetyltransferase activity	---	---	chrNA:-1--1	TC02004689.hg.1	8.6785	8.60231	8.28239	8.1212	8.59328	8.61732	7.35239	7.61184	7.83442	7.59808	7.73516	8.40056	8.10714	7.45729	7.54924	8.34954	9.08975	8.62752
224	TC02004744.hg.1	TFPI	AK130306	NONCODE	accn=AK130306 class=mRNAlike lncRNA name=Human lncRNA ref=JounralRNA transcriptId=1485 cpcScore=-1.0846000 cnci=-0.3071581	FALSE	chr2	GO:0007596 // GO:0007598 // GO:0010951 // GO:0010951 // GO:0007596 // GO:0007599 // GO:0010466	blood coagulation // blood coagulation, extrinsic pathway // negative regulation of endopeptidase activity // negative regulation of endopeptidase activity // blood coagulation // hemostasis // negative regulation of peptidase activity	GO:0005576 // GO:0005615 // GO:0005783 // GO:0005886 // GO:0031090 // GO:0031225 // GO:0005576 // GO:0016020 // GO:0043231	extracellular region // extracellular space // endoplasmic reticulum // plasma membrane // organelle membrane // anchored component of membrane // extracellular region // membrane // intracellular membrane-bounded organelle	GO:0004866 // GO:0004867 // GO:0030414	endopeptidase inhibitor activity // serine-type endopeptidase inhibitor activity // peptidase inhibitor activity	---	---	chrNA:-1--1	TC02004744.hg.1	11.4786	11.6425	11.1485	10.6023	10.245	10.4897	12.0984	12.6492	12.831	12.001	11.4426	12.2128	8.76186	9.00955	9.51455	8.04458	7.85558	7.48627
225	TC02004802.hg.1	---	TCONS_00004570-XLOC_002477	Rinn lincRNA	linc-IKZF2-2 chr2:-:214101740-214103567	FALSE	chr2	---	---	---	---	---	---	---	---	chrNA:-1--1	TC02004802.hg.1	4.45052	3.75395	4.38551	4.1123	3.90444	4.68491	4.61818	4.82242	4.33462	4.50798	4.44736	4.55475	4.82989	4.66601	4.75855	5.68554	5.74848	5.92657
226	TC02004902.hg.1	HDLBP	uc010zoo.1	NONCODE	accn=NULL class=lncRNA name= ref=UCSCGeneNoncode transcriptId=uc010zoo.1 cpcScore=0.0515160 cnci=-0.2757118	FALSE	chr2	GO:0006869 // GO:0008203 // GO:0006629 // GO:0006810 // GO:0008202 // GO:0008203	lipid transport // cholesterol metabolic process // lipid metabolic process // transport // steroid metabolic process // cholesterol metabolic process	GO:0005634 // GO:0005737 // GO:0005886 // GO:0034364 // GO:0005737	nucleus // cytoplasm // plasma membrane // high-density lipoprotein particle // cytoplasm	GO:0008289 // GO:0044822 // GO:0003723 // GO:0005515	lipid binding // poly(A) RNA binding // RNA binding // protein binding	---	---	chrNA:-1--1	TC02004902.hg.1	6.05149	6.32567	5.82761	7.32393	7.35144	7.3378	6.08962	6.17775	6.23529	5.98313	5.79877	5.75854	6.48743	6.72293	6.5317	5.99791	6.91328	6.46315
227	TC02004907.hg.1	DTYMK	NR_033255	NONCODE	accn=NR_033255 class=lncRNA name= ref=RefGeneNoncode transcriptId=NR_033255 cpcScore=3.3049900 cnci=-0.1963520	FALSE	chr2	GO:0006233 // GO:0006235 // GO:0007049 // GO:0008283 // GO:0015949 // GO:0043627 // GO:0044281 // GO:0045445 // GO:0046686 // GO:0046939 // GO:0046939 // GO:0046939 // GO:0046940 // GO:0055086 // GO:0071363 // GO:0009165 // GO:0016310 // GO:0046940	dTDP biosynthetic process // dTTP biosynthetic process // cell cycle // cell proliferation // nucleobase-containing small molecule interconversion // response to estrogen // small molecule metabolic process // myoblast differentiation // response to cadmium ion // nucleotide phosphorylation // nucleotide phosphorylation // nucleotide phosphorylation // nucleoside monophosphate phosphorylation // …	GO:0005758 // GO:0005759 // GO:0005829 // GO:0005739	mitochondrial intermembrane space // mitochondrial matrix // cytosol // mitochondrion	GO:0004798 // GO:0005524 // GO:0050145 // GO:0000166 // GO:0004798 // GO:0004798 // GO:0016301 // GO:0016740 // GO:0050145	thymidylate kinase activity // ATP binding // nucleoside phosphate kinase activity // nucleotide binding // thymidylate kinase activity // thymidylate kinase activity // kinase activity // transferase activity // nucleoside phosphate kinase activity	---	---	chrNA:-1--1	TC02004907.hg.1	11.6957	12.3407	11.8621	11.7879	11.9612	12.2968	11.2511	10.9467	10.4977	10.7712	10.5646	10.9828	12.9398	13.0412	12.8647	11.0665	10.7847	11.0102
228	TC02004970.hg.1	MXD1	NM_001202513	RefSeq	Homo sapiens MAX dimerization protein 1 (MXD1), transcript variant 2, mRNA.	FALSE	chr2	GO:0000122 // GO:0006351 // GO:0007275 // GO:0008283 // GO:0006355	negative regulation of transcription from RNA polymerase II promoter // transcription, DNA-templated // multicellular organismal development // cell proliferation // regulation of transcription, DNA-templated	GO:0005634 // GO:0005634	nucleus // nucleus	GO:0000978 // GO:0001078 // GO:0003700 // GO:0003712 // GO:0003714 // GO:0046983 // GO:0003677	RNA polymerase II core promoter proximal region sequence-specific DNA binding // RNA polymerase II core promoter proximal region sequence-specific DNA binding transcription factor activity involved in negative regulation of transcription // sequence-specific DNA binding transcription factor activity // transcription cofactor activity // transcription corepressor activity // protein dimerization a…	---	---	chrNA:-1--1	TC02004970.hg.1	7.56621	8.11973	7.71437	8.83499	8.74445	8.92152	7.38903	7.43904	7.377	8.25605	8.32656	8.38487	8.21685	8.00976	8.35387	8.86158	9.80269	9.71963
229	TC02004972.hg.1	WBP1	NM_012477	RefSeq	Homo sapiens WW domain binding protein 1 (WBP1), mRNA.	FALSE	chr2	GO:0008150	biological_process	GO:0005575	cellular_component	GO:0005515 // GO:0050699 // GO:0050699 // GO:0050699	protein binding // WW domain binding // WW domain binding // WW domain binding	---	---	chrNA:-1--1	TC02004972.hg.1	8.18101	9.08795	8.86293	8.44545	8.3387	8.37454	7.73302	7.91061	7.72526	8.06228	7.84784	8.26471	7.97032	7.87104	7.78435	8.3941	8.81989	8.93584
230	TC03000039.hg.1	MTMR14	NM_001077525	RefSeq	Homo sapiens myotubularin related protein 14 (MTMR14), transcript variant 2, mRNA.	FALSE	chr3	GO:0006644 // GO:0006661 // GO:0035335 // GO:0044281 // GO:0016311	phospholipid metabolic process // phosphatidylinositol biosynthetic process // peptidyl-tyrosine dephosphorylation // small molecule metabolic process // dephosphorylation	GO:0001726 // GO:0005829 // GO:0048471 // GO:0005737	ruffle // cytosol // perinuclear region of cytoplasm // cytoplasm	GO:0004438 // GO:0004725 // GO:0016787 // GO:0016791	phosphatidylinositol-3-phosphatase activity // protein tyrosine phosphatase activity // hydrolase activity // phosphatase activity	---	---	chrNA:-1--1	TC03000039.hg.1	11.0261	12.0832	11.9157	11.8378	11.7429	12.4859	9.20871	8.96716	8.99312	10.2441	10.0135	10.3287	9.15123	8.82474	8.90393	9.47787	10.2769	10.2463
231	TC03000050.hg.1	EMC3-AS1	ENST00000326237	ENSEMBL	havana:known chromosome:GRCh38:3:9986911:10005244:1 gene:ENSG00000180385 gene_biotype:transcribed_unprocessed_pseudogene transcript_biotype:processed_transcript	FALSE	chr3	---	---	---	---	---	---	---	---	chrNA:-1--1	TC03000050.hg.1	13.1577	13.104	13.6242	14.3724	14.1816	14.243	10.6098	10.5586	11.2881	11.2136	10.9469	11.0951	12.068	12.2149	12.298	9.83107	10.1079	9.99316
232	TC03000051.hg.1	FANCD2	NM_001018115	RefSeq	Homo sapiens Fanconi anemia, complementation group D2 (FANCD2), transcript variant 2, mRNA.	FALSE	chr3	GO:0006281 // GO:0007129 // GO:0007276 // GO:0010332 // GO:0006281 // GO:0006974 // GO:0007049	DNA repair // synapsis // gamete generation // response to gamma radiation // DNA repair // cellular response to DNA damage stimulus // cell cycle	GO:0000793 // GO:0005634 // GO:0005654 // GO:0005730 // GO:0005794 // GO:0043231 // GO:0005634	condensed chromosome // nucleus // nucleoplasm // nucleolus // Golgi apparatus // intracellular membrane-bounded organelle // nucleus	GO:0005515 // GO:0070182	protein binding // DNA polymerase binding	---	---	chrNA:-1--1	TC03000051.hg.1	11.7337	11.8692	12.0264	12.0883	12.1078	12.2328	8.90727	8.98256	9.09327	8.86912	8.62319	9.28565	10.1591	10.3438	10.3684	7.88956	8.00743	8.30419
233	TC03000056.hg.1	IRAK2	NM_001570	RefSeq	Homo sapiens interleukin-1 receptor-associated kinase 2 (IRAK2), mRNA.	FALSE	chr3	GO:0000187 // GO:0001959 // GO:0002224 // GO:0002755 // GO:0002756 // GO:0006468 // GO:0006954 // GO:0007249 // GO:0007254 // GO:0031663 // GO:0032088 // GO:0034134 // GO:0034138 // GO:0034142 // GO:0034146 // GO:0034162 // GO:0034166 // GO:0035666 // GO:0035872 // GO:0038123 // GO:0038124 // GO:0045087 // GO:0051092 // GO:0051092 // GO:0051403 // GO:0070423 // GO:0070498 // GO:0070555 // GO:0006…	activation of MAPK activity // regulation of cytokine-mediated signaling pathway // toll-like receptor signaling pathway // MyD88-dependent toll-like receptor signaling pathway // MyD88-independent toll-like receptor signaling pathway // protein phosphorylation // inflammatory response // I-kappaB kinase/NF-kappaB signaling // JNK cascade // lipopolysaccharide-mediated signaling pathway // negati…	GO:0005829 // GO:0005886 // GO:0010008	cytosol // plasma membrane // endosome membrane	GO:0004672 // GO:0005515 // GO:0005524 // GO:0042803 // GO:0046982 // GO:0000166 // GO:0016772 // GO:0016301	protein kinase activity // protein binding // ATP binding // protein homodimerization activity // protein heterodimerization activity // nucleotide binding // transferase activity, transferring phosphorus-containing groups // kinase activity	---	---	chrNA:-1--1	TC03000056.hg.1	14.4925	15.4409	15.3005	15.0549	14.9391	15.1447	7.5286	7.81071	7.77547	9.44997	9.12402	9.74552	8.60325	8.88037	8.93481	8.90618	9.6446	9.52617
234	TC03000120.hg.1	HMGB1P5	ENST00000451497	ENSEMBL	havana:known chromosome:GRCh38:3:22381945:22382929:1 gene:ENSG00000132967 gene_biotype:transcribed_processed_pseudogene transcript_biotype:processed_transcript	FALSE	chr3	GO:0000122 // GO:0001773 // GO:0002407 // GO:0002437 // GO:0006265 // GO:0006288 // GO:0006309 // GO:0006310 // GO:0006357 // GO:0006915 // GO:0006921 // GO:0017055 // GO:0031175 // GO:0033151 // GO:0043065 // GO:0043280 // GO:0043388 // GO:0045087 // GO:0045944 // GO:0050918 // GO:0051103 // GO:2000426	negative regulation of transcription from RNA polymerase II promoter // myeloid dendritic cell activation // dendritic cell chemotaxis // inflammatory response to antigenic stimulus // DNA topological change // base-excision repair, DNA ligation // apoptotic DNA fragmentation // DNA recombination // regulation of transcription from RNA polymerase II promoter // apoptotic process // cellular compo…	GO:0000793 // GO:0005576 // GO:0005615 // GO:0005634 // GO:0005634 // GO:0005654 // GO:0005694 // GO:0009986 // GO:0017053	condensed chromosome // extracellular region // extracellular space // nucleus // nucleus // nucleoplasm // chromosome // cell surface // transcriptional repressor complex	GO:0003677 // GO:0003684 // GO:0003690 // GO:0003697 // GO:0003700 // GO:0005125 // GO:0005515 // GO:0008134 // GO:0008301 // GO:0008301 // GO:0042056 // GO:0044822 // GO:0050786 // GO:0070491	DNA binding // damaged DNA binding // double-stranded DNA binding // single-stranded DNA binding // sequence-specific DNA binding transcription factor activity // cytokine activity // protein binding // transcription factor binding // DNA binding, bending // DNA binding, bending // chemoattractant activity // poly(A) RNA binding // RAGE receptor binding // repressing transcription factor binding	---	---	chrNA:-1--1	TC03000120.hg.1	12.4916	12.7983	12.9745	12.2069	12.0723	12.5378	13.8767	13.6001	13.4556	13.3752	13.4355	13.7755	15.1562	15.158	14.6493	13.532	13.1979	13.4313
235	TC03000160.hg.1	---	ENST00000385122	ENSEMBL	ncrna:novel chromosome:GRCh38:3:32259728:32259819:1 gene:ENSG00000207857 gene_biotype:miRNA transcript_biotype:miRNA	FALSE	chr3	---	---	---	---	---	---	---	---	chrNA:-1--1	TC03000160.hg.1	9.29224	10.7033	10.0186	9.9814	9.58104	10.1889	13.4469	12.2344	12.454	9.09294	9.35556	9.63868	10.1706	10.6603	10.1902	8.99402	8.57371	9.00767
236	TC03000166.hg.1	FBXL2	NM_001171713	RefSeq	Homo sapiens F-box and leucine-rich repeat protein 2 (FBXL2), transcript variant 2, mRNA.	FALSE	chr3	GO:0006464 // GO:0006508 // GO:0006511 // GO:0006513 // GO:0016032	cellular protein modification process // proteolysis // ubiquitin-dependent protein catabolic process // protein monoubiquitination // viral process	GO:0005737 // GO:0016020 // GO:0016020	cytoplasm // membrane // membrane	GO:0004842 // GO:0005515 // GO:0005516 // GO:0004842	ubiquitin-protein transferase activity // protein binding // calmodulin binding // ubiquitin-protein transferase activity	---	---	chrNA:-1--1	TC03000166.hg.1	6.69122	7.17479	6.66671	6.98213	6.85996	6.96619	5.6674	6.17477	6.26678	6.43737	6.65129	6.95115	6.3315	6.27896	6.3098	7.12626	7.97366	7.64526
237	TC03000234.hg.1	---	DQ592230	GenBank	Homo sapiens piRNA piR-59342, complete sequence.	FALSE	chr3	---	---	---	---	---	---	---	---	chrNA:-1--1	TC03000234.hg.1	5.969	5.92584	5.64805	8.13191	8.31794	8.75407	8.40718	8.22149	8.78068	8.31495	8.56445	8.82117	8.40725	8.72168	8.88417	8.12418	8.62083	8.53038
238	TC03000242.hg.1	KIF15	NM_020242	RefSeq	Homo sapiens kinesin family member 15 (KIF15), mRNA.	FALSE	chr3	GO:0007018 // GO:0007067 // GO:0007596 // GO:0008152 // GO:0008152 // GO:0008283 // GO:0019886 // GO:0007018	microtubule-based movement // mitotic nuclear division // blood coagulation // metabolic process // metabolic process // cell proliferation // antigen processing and presentation of exogenous peptide antigen via MHC class II // microtubule-based movement	GO:0005813 // GO:0005819 // GO:0005829 // GO:0005873 // GO:0005874 // GO:0005737 // GO:0005856 // GO:0005871 // GO:0016020	centrosome // spindle // cytosol // plus-end kinesin complex // microtubule // cytoplasm // cytoskeleton // kinesin complex // membrane	GO:0003677 // GO:0003774 // GO:0003777 // GO:0005524 // GO:0008017 // GO:0000166	DNA binding // motor activity // microtubule motor activity // ATP binding // microtubule binding // nucleotide binding	---	---	chrNA:-1--1	TC03000242.hg.1	6.80926	7.27644	7.10199	6.68874	6.63633	6.74491	8.0627	7.63077	7.62905	7.03594	7.00329	7.49013	8.35835	8.29757	8.29287	5.79965	5.81014	5.92314
239	TC03000411.hg.1	---	uc021xaf.1	UCSC Genes	Rfam model RF01061 hit found at contig region AC138390.2/100893-100976	FALSE	chr3	---	---	---	---	---	---	---	---	chrNA:-1--1	TC03000411.hg.1	8.3252	9.10757	8.58558	8.96211	8.70234	8.80342	8.15996	8.15457	8.17649	7.10643	7.4041	7.23674	8.00338	8.06115	8.2957	7.9034	8.07218	7.55845
240	TC03000499.hg.1	---	ENST00000517102	ENSEMBL	[retired] ncrna:snRNA chromosome:GRCh37:3:98706231:98706293:1 gene:ENSG00000252911 gene_biotype:snRNA transcript_biotype:snRNA	FALSE	chr3	---	---	---	---	---	---	---	---	chrNA:-1--1	TC03000499.hg.1	6.89112	6.76173	6.54953	10.0738	9.62589	9.57629	5.07229	5.20961	5.27016	4.76311	4.65477	4.59387	4.59516	5.17634	4.96837	4.61072	4.72574	5.31143
241	TC03000519.hg.1	PCNP	NM_020357	RefSeq	Homo sapiens PEST proteolytic signal containing nuclear protein (PCNP), mRNA.	FALSE	chr3	GO:0007049 // GO:0016567 // GO:0043161 // GO:0016567	cell cycle // protein ubiquitination // proteasome-mediated ubiquitin-dependent protein catabolic process // protein ubiquitination	GO:0005634 // GO:0005634	nucleus // nucleus	GO:0005515	protein binding	---	---	chrNA:-1--1	TC03000519.hg.1	9.47532	9.74229	9.72586	10.1959	10.184	10.4401	10.7317	10.7408	10.6609	11.4065	11.4277	11.5398	11.0801	10.6574	10.7614	10.9904	11.4735	11.7608
242	TC03000582.hg.1	---	uc021xcr.1	UCSC Genes	Rfam model RF00017 hit found at contig region AC055740.17/60791-60498	FALSE	chr3	---	---	---	---	---	---	---	---	chrNA:-1--1	TC03000582.hg.1	10.6973	10.6171	10.7477	11.4701	11.5016	11.3556	12.48	12.4889	12.8561	12.7706	12.3629	13.1044	12.9233	12.6746	12.325	13.5376	12.7194	12.4028
243	TC03000664.hg.1	MCM2	NM_004526	RefSeq	Homo sapiens minichromosome maintenance complex component 2 (MCM2), transcript variant 1, mRNA.	FALSE	chr3	GO:0000082 // GO:0000278 // GO:0006260 // GO:0006268 // GO:0006270 // GO:0006271 // GO:0006334 // GO:0007049 // GO:0071353 // GO:0006260 // GO:0006270 // GO:0007049 // GO:0032508	G1/S transition of mitotic cell cycle // mitotic cell cycle // DNA replication // DNA unwinding involved in DNA replication // DNA replication initiation // DNA strand elongation involved in DNA replication // nucleosome assembly // cell cycle // cellular response to interleukin-4 // DNA replication // DNA replication initiation // cell cycle // DNA duplex unwinding	GO:0000785 // GO:0005634 // GO:0005654 // GO:0005664 // GO:0005730 // GO:0005737 // GO:0015630 // GO:0042555 // GO:0000785 // GO:0005634 // GO:0005634 // GO:0042555	chromatin // nucleus // nucleoplasm // nuclear origin of replication recognition complex // nucleolus // cytoplasm // microtubule cytoskeleton // MCM complex // chromatin // nucleus // nucleus // MCM complex	GO:0003677 // GO:0003678 // GO:0003688 // GO:0005515 // GO:0005524 // GO:0042393 // GO:0046872 // GO:0000166 // GO:0003677 // GO:0004386 // GO:0016787	DNA binding // DNA helicase activity // DNA replication origin binding // protein binding // ATP binding // histone binding // metal ion binding // nucleotide binding // DNA binding // helicase activity // hydrolase activity	GenMAPP // GenMAPP // GenMAPP	Cell_cycle_KEGG // DNA_replication_Reactome // G1_to_S_cell_cycle_Reactome	chrNA:-1--1	TC03000664.hg.1	7.44036	7.77405	7.6515	7.57678	7.64848	7.72183	9.25662	9.33447	9.31838	10.0457	9.60884	10.1719	8.60522	8.56873	8.44443	6.77139	6.62251	6.91672
244	TC03000670.hg.1	SEC61A1	NM_013336	RefSeq	Homo sapiens Sec61 alpha 1 subunit (S. cerevisiae) (SEC61A1), mRNA.	FALSE	chr3	GO:0002474 // GO:0002479 // GO:0006614 // GO:0006620 // GO:0007029 // GO:0016049 // GO:0034341 // GO:0042590 // GO:0045047 // GO:0006810 // GO:0015031 // GO:1902600	antigen processing and presentation of peptide antigen via MHC class I // antigen processing and presentation of exogenous peptide antigen via MHC class I, TAP-dependent // SRP-dependent cotranslational protein targeting to membrane // posttranslational protein targeting to membrane // endoplasmic reticulum organization // cell growth // response to interferon-gamma // antigen processing and pres…	GO:0005791 // GO:0016020 // GO:0030176 // GO:0005783 // GO:0005789 // GO:0016020 // GO:0016021 // GO:0005739	rough endoplasmic reticulum // membrane // integral component of endoplasmic reticulum membrane // endoplasmic reticulum // endoplasmic reticulum membrane // membrane // integral component of membrane // mitochondrion	GO:0005515 // GO:0043022 // GO:0043022 // GO:0004129	protein binding // ribosome binding // ribosome binding // cytochrome-c oxidase activity	---	---	chrNA:-1--1	TC03000670.hg.1	9.67225	9.67081	9.74159	10.7594	10.6492	10.7823	12.2836	12.4321	12.6415	12.3935	11.9871	12.4115	10.936	11.134	11.1031	10.8117	10.6349	10.6743
245	TC03000689.hg.1	COPG1	NM_016128	RefSeq	Homo sapiens coatomer protein complex, subunit gamma 1 (COPG1), mRNA.	FALSE	chr3	GO:0006886 // GO:0006890 // GO:0048205 // GO:0051683 // GO:0061024 // GO:0072384 // GO:0006810 // GO:0015031 // GO:0016192 // GO:0051683 // GO:0072384	intracellular protein transport // retrograde vesicle-mediated transport, Golgi to ER // COPI coating of Golgi vesicle // establishment of Golgi localization // membrane organization // organelle transport along microtubule // transport // protein transport // vesicle-mediated transport // establishment of Golgi localization // organelle transport along microtubule	GO:0000139 // GO:0005829 // GO:0030126 // GO:0000139 // GO:0005737 // GO:0005794 // GO:0016020 // GO:0030117 // GO:0030126 // GO:0030663 // GO:0031410	Golgi membrane // cytosol // COPI vesicle coat // Golgi membrane // cytoplasm // Golgi apparatus // membrane // membrane coat // COPI vesicle coat // COPI-coated vesicle membrane // cytoplasmic vesicle	GO:0005198 // GO:0005515	structural molecule activity // protein binding	---	---	chrNA:-1--1	TC03000689.hg.1	7.87651	8.31469	8.14404	8.90057	9.12119	9.43198	9.73664	9.55443	9.5946	10.2376	10.0476	10.4397	9.34775	9.49309	9.42166	10.3072	10.6001	10.9289
246	TC03000701.hg.1	RP11-77P16.4	OTTHUMT00000358308	Havana transcript	cdna:all chromosome:VEGA56:3:130112550:130119174:1 Gene:OTTHUMG00000159926	FALSE	chr3	---	---	---	---	---	---	---	---	chrNA:-1--1	TC03000701.hg.1	5.70878	5.35718	5.99085	5.88105	6.22972	5.91744	5.90094	5.48381	5.5222	5.3314	5.07718	5.82722	5.28067	5.6002	5.53086	6.59061	6.77832	6.59114
247	TC03000752.hg.1	RP11-319G6.3	OTTHUMT00000358493	Havana transcript	cdna:all chromosome:VEGA56:3:139466430:139466795:1 Gene:OTTHUMG00000159957	FALSE	chr3	---	---	---	---	---	---	---	---	chrNA:-1--1	TC03000752.hg.1	4.95257	5.36738	5.45424	5.29113	5.33492	5.33058	4.51986	4.7642	4.64893	4.76489	4.83556	5.46243	5.01552	5.19816	4.70812	5.85096	6.22586	6.25468
248	TC03000829.hg.1	RP11-64D22.5	OTTHUMT00000369664	Havana transcript	cdna:all chromosome:VEGA56:3:151797484:151808249:1 Gene:OTTHUMG00000162581	FALSE	chr3	---	---	---	---	---	---	---	---	chrNA:-1--1	TC03000829.hg.1	8.9571	9.40969	9.34882	10.6329	11.1679	11.1619	8.71605	8.77874	9.31391	7.59813	7.36044	7.28897	13.6749	13.7265	13.6672	13.3064	13.7466	13.542
249	TC03000833.hg.1	---	ENST00000364347	ENSEMBL	ncrna:novel chromosome:GRCh38:3:152449272:152449384:1 gene:ENSG00000201217 gene_biotype:misc_RNA transcript_biotype:misc_RNA	FALSE	chr3	---	---	---	---	---	---	---	---	chrNA:-1--1	TC03000833.hg.1	7.09676	7.49199	8.06818	7.07449	7.02858	6.91449	10.6525	10.5878	10.6444	8.3481	8.04789	8.35879	7.76674	9.3024	8.47487	6.81748	8.48611	7.82789
250	TC03000873.hg.1	SMC4	NM_001002800	RefSeq	Homo sapiens structural maintenance of chromosomes 4 (SMC4), transcript variant 2, mRNA.	FALSE	chr3	GO:0000070 // GO:0000278 // GO:0007076 // GO:0010032 // GO:0045132 // GO:0051383 // GO:0007049 // GO:0007067 // GO:0030261 // GO:0051276 // GO:0051301	mitotic sister chromatid segregation // mitotic cell cycle // mitotic chromosome condensation // meiotic chromosome condensation // meiotic chromosome segregation // kinetochore organization // cell cycle // mitotic nuclear division // chromosome condensation // chromosome organization // cell division	GO:0000796 // GO:0000796 // GO:0005634 // GO:0005634 // GO:0005654 // GO:0005730 // GO:0005737 // GO:0005829 // GO:0005634 // GO:0005694 // GO:0005737	condensin complex // condensin complex // nucleus // nucleus // nucleoplasm // nucleolus // cytoplasm // cytosol // nucleus // chromosome // cytoplasm	GO:0005515 // GO:0005524 // GO:0046982 // GO:0000166 // GO:0005524	protein binding // ATP binding // protein heterodimerization activity // nucleotide binding // ATP binding	---	---	chrNA:-1--1	TC03000873.hg.1	10.6845	10.8588	10.8703	10.5389	10.2605	10.655	11.782	11.5864	11.4873	10.5354	11.2676	11.4399	11.4991	11.4412	11.826	8.33012	8.98424	8.94248
251	TC03000930.hg.1	ECT2	NM_018098	RefSeq	Homo sapiens epithelial cell transforming 2 (ECT2), transcript variant 3, mRNA.	FALSE	chr3	GO:0000902 // GO:0000910 // GO:0007264 // GO:0015031 // GO:0032147 // GO:0032321 // GO:0032321 // GO:0032467 // GO:0032467 // GO:0032862 // GO:0032863 // GO:0042307 // GO:0043065 // GO:0043065 // GO:0043089 // GO:0043123 // GO:0045666 // GO:0045859 // GO:0048011 // GO:0051056 // GO:0051260 // GO:0051988 // GO:0070301 // GO:0070830 // GO:0071277 // GO:0071479 // GO:0097190 // GO:0000910 // GO:0006…	cell morphogenesis // cytokinesis // small GTPase mediated signal transduction // protein transport // activation of protein kinase activity // positive regulation of Rho GTPase activity // positive regulation of Rho GTPase activity // positive regulation of cytokinesis // positive regulation of cytokinesis // activation of Rho GTPase activity // activation of Rac GTPase activity // positive regu…	GO:0005634 // GO:0005737 // GO:0005829 // GO:0005911 // GO:0005923 // GO:0030496 // GO:0032154 // GO:0072686 // GO:0097149 // GO:0005634 // GO:0005737 // GO:0005819 // GO:0005856 // GO:0005923 // GO:0030054 // GO:0030496 // GO:0032154	nucleus // cytoplasm // cytosol // cell-cell junction // tight junction // midbody // cleavage furrow // mitotic spindle // centralspindlin complex // nucleus // cytoplasm // spindle // cytoskeleton // tight junction // cell junction // midbody // cleavage furrow	GO:0004871 // GO:0005089 // GO:0005096 // GO:0005515 // GO:0017048 // GO:0042803 // GO:0005085 // GO:0005089 // GO:0005096	signal transducer activity // Rho guanyl-nucleotide exchange factor activity // GTPase activator activity // protein binding // Rho GTPase binding // protein homodimerization activity // guanyl-nucleotide exchange factor activity // Rho guanyl-nucleotide exchange factor activity // GTPase activator activity	---	---	chrNA:-1--1	TC03000930.hg.1	10.0295	10.794	10.5009	10.7333	10.5543	10.9091	11.1178	11.0056	11.0659	10.4716	10.8433	11.2566	11.3228	10.9983	11.4273	8.74823	9.26709	9.53932
252	TC03000963.hg.1	TTC14	NM_001042601	RefSeq	Homo sapiens tetratricopeptide repeat domain 14 (TTC14), transcript variant 2, mRNA.	FALSE	chr3	---	---	---	---	GO:0003723	RNA binding	---	---	chrNA:-1--1	TC03000963.hg.1	6.65516	6.93325	6.7062	7.24057	7.16877	7.42653	8.06906	8.64224	8.56268	8.45088	9.26943	9.33056	7.85761	7.77699	8.04514	8.62972	9.57077	9.05471
253	TC03001008.hg.1	VPS8	NM_001009921	RefSeq	Homo sapiens vacuolar protein sorting 8 homolog (S. cerevisiae) (VPS8), transcript variant 1, mRNA.	FALSE	chr3	---	---	---	---	GO:0008270 // GO:0046872	zinc ion binding // metal ion binding	---	---	chrNA:-1--1	TC03001008.hg.1	6.74928	6.946	6.87226	7.11194	7.14379	7.14663	7.03016	6.83216	7.16753	7.80309	7.90449	7.78426	6.06836	6.37081	6.3455	6.88905	7.403	7.36846
254	TC03001014.hg.1	LOC344887	NR_033752	RefSeq	Homo sapiens NmrA-like family domain containing 1 pseudogene (LOC344887), non-coding RNA.	FALSE	chr3	---	---	---	---	---	---	---	---	chrNA:-1--1	TC03001014.hg.1	5.86795	5.28576	6.12109	7.29083	7.26397	7.40766	7.01053	6.7738	6.6704	7.28704	7.32179	7.33691	11.3937	11.7298	11.2598	12.1966	12.95	12.6068
255	TC03001042.hg.1	TP63	NM_001114978	RefSeq	Homo sapiens tumor protein p63 (TP63), transcript variant 2, mRNA.	FALSE	chr3	GO:0000122 // GO:0001501 // GO:0001736 // GO:0002053 // GO:0002064 // GO:0006338 // GO:0006351 // GO:0006915 // GO:0006974 // GO:0006978 // GO:0007219 // GO:0007499 // GO:0007569 // GO:0009954 // GO:0010165 // GO:0010259 // GO:0010332 // GO:0010481 // GO:0010482 // GO:0030216 // GO:0030326 // GO:0030859 // GO:0031069 // GO:0031571 // GO:0034644 // GO:0036342 // GO:0042475 // GO:0042771 // GO:0043…	negative regulation of transcription from RNA polymerase II promoter // skeletal system development // establishment of planar polarity // positive regulation of mesenchymal cell proliferation // epithelial cell development // chromatin remodeling // transcription, DNA-templated // apoptotic process // cellular response to DNA damage stimulus // DNA damage response, signal transduction by p53 cla…	GO:0000785 // GO:0000790 // GO:0005634 // GO:0005634 // GO:0005654 // GO:0005667 // GO:0005730 // GO:0005737 // GO:0005829 // GO:0030425 // GO:0000785 // GO:0005634 // GO:0005667 // GO:0005829 // GO:0030425 // GO:0005737	chromatin // nuclear chromatin // nucleus // nucleus // nucleoplasm // transcription factor complex // nucleolus // cytoplasm // cytosol // dendrite // chromatin // nucleus // transcription factor complex // cytosol // dendrite // cytoplasm	GO:0001077 // GO:0002039 // GO:0003677 // GO:0003682 // GO:0003682 // GO:0003684 // GO:0003690 // GO:0003700 // GO:0005515 // GO:0042802 // GO:0043565 // GO:0044212 // GO:0046872 // GO:0050699 // GO:0002039 // GO:0003677 // GO:0003682 // GO:0003682 // GO:0003684 // GO:0003684 // GO:0003690 // GO:0003700 // GO:0003700 // GO:0042802 // GO:0043565 // GO:0043565	RNA polymerase II core promoter proximal region sequence-specific DNA binding transcription factor activity involved in positive regulation of transcription // p53 binding // DNA binding // chromatin binding // chromatin binding // damaged DNA binding // double-stranded DNA binding // sequence-specific DNA binding transcription factor activity // protein binding // identical protein binding // se…	---	---	chrNA:-1--1	TC03001042.hg.1	8.96271	9.60237	9.50954	7.536	7.28907	7.49394	5.76644	5.46174	5.45111	5.64759	5.63807	5.43394	11.7057	11.524	11.4115	11.0921	11.5711	11.8265
256	TC03001043.hg.1	MIR944	NR_030642	RefSeq	Homo sapiens microRNA 944 (MIR944), microRNA.	FALSE	chr3	---	---	---	---	---	---	---	---	chrNA:-1--1	TC03001043.hg.1	7.93163	7.85902	8.30205	5.94944	6.36887	6.13653	4.87268	4.24573	5.47754	4.94087	4.63435	5.25336	8.65354	8.49389	8.45399	9.04341	9.74187	8.74938
257	TC03001046.hg.1	CLDN16	NM_006580	RefSeq	Homo sapiens claudin 16 (CLDN16), mRNA.	FALSE	chr3	GO:0006875 // GO:0007588 // GO:0015693 // GO:0016338 // GO:0006810 // GO:0006811	cellular metal ion homeostasis // excretion // magnesium ion transport // calcium-independent cell-cell adhesion // transport // ion transport	GO:0005886 // GO:0005923 // GO:0016021 // GO:0005923 // GO:0005923 // GO:0016020 // GO:0030054	plasma membrane // tight junction // integral component of membrane // tight junction // tight junction // membrane // cell junction	GO:0005198 // GO:0005515 // GO:0015095 // GO:0042802	structural molecule activity // protein binding // magnesium ion transmembrane transporter activity // identical protein binding	---	---	chrNA:-1--1	TC03001046.hg.1	6.0791	6.22487	6.04347	5.68156	6.07526	5.81644	5.34334	5.43405	5.37196	5.34689	5.73972	5.76808	5.89342	5.81734	6.15523	7.00471	7.00026	7.09112
258	TC03001146.hg.1	RAD18	NM_020165	RefSeq	Homo sapiens RAD18 homolog (S. cerevisiae) (RAD18), mRNA.	FALSE	chr3	GO:0006281 // GO:0007283 // GO:0009411 // GO:0016567 // GO:0045910 // GO:0006281 // GO:0006974	DNA repair // spermatogenesis // response to UV // protein ubiquitination // negative regulation of DNA recombination // DNA repair // cellular response to DNA damage stimulus	GO:0000785 // GO:0001741 // GO:0005634 // GO:0005657 // GO:0005634	chromatin // XY body // nucleus // replication fork // nucleus	GO:0000403 // GO:0003684 // GO:0005515 // GO:0008270 // GO:0016874 // GO:0031593 // GO:0031625 // GO:0003676 // GO:0003677 // GO:0046872	Y-form DNA binding // damaged DNA binding // protein binding // zinc ion binding // ligase activity // polyubiquitin binding // ubiquitin protein ligase binding // nucleic acid binding // DNA binding // metal ion binding	---	---	chrNA:-1--1	TC03001146.hg.1	7.92164	8.01989	7.90727	8.56096	8.38623	8.53122	10.1386	9.54476	9.68483	8.87482	8.91328	9.30676	9.67735	9.61452	9.75994	7.93368	7.93738	8.19165
259	TC03001188.hg.1	NUP210	NM_024923	RefSeq	Homo sapiens nucleoporin 210kDa (NUP210), mRNA.	FALSE	chr3	GO:0000278 // GO:0005975 // GO:0007077 // GO:0008645 // GO:0010827 // GO:0015031 // GO:0015758 // GO:0016032 // GO:0019221 // GO:0044281 // GO:0051028 // GO:0055085 // GO:0006810	mitotic cell cycle // carbohydrate metabolic process // mitotic nuclear envelope disassembly // hexose transport // regulation of glucose transport // protein transport // glucose transport // viral process // cytokine-mediated signaling pathway // small molecule metabolic process // mRNA transport // transmembrane transport // transport	GO:0005635 // GO:0005643 // GO:0005789 // GO:0031965 // GO:0005634 // GO:0005635 // GO:0005783 // GO:0016020 // GO:0016020 // GO:0016021	nuclear envelope // nuclear pore // endoplasmic reticulum membrane // nuclear membrane // nucleus // nuclear envelope // endoplasmic reticulum // membrane // membrane // integral component of membrane	GO:0046983	protein dimerization activity	---	---	chrNA:-1--1	TC03001188.hg.1	9.72352	10.5334	10.4743	9.40794	9.29069	9.50193	9.64721	9.3653	9.80479	10.0547	9.43464	9.99512	8.46354	8.65185	8.56274	6.84868	6.56609	6.89609
260	TC03001227.hg.1	SGOL1	NM_001012409	RefSeq	Homo sapiens shugoshin-like 1 (S. pombe) (SGOL1), transcript variant A1, mRNA.	FALSE	chr3	GO:0000278 // GO:0007059 // GO:0007067 // GO:0008608 // GO:0010457 // GO:0010457 // GO:0045132 // GO:0007049 // GO:0007059 // GO:0045132 // GO:0051301	mitotic cell cycle // chromosome segregation // mitotic nuclear division // attachment of spindle microtubules to kinetochore // centriole-centriole cohesion // centriole-centriole cohesion // meiotic chromosome segregation // cell cycle // chromosome segregation // meiotic chromosome segregation // cell division	GO:0000775 // GO:0000776 // GO:0000777 // GO:0000779 // GO:0000780 // GO:0000922 // GO:0005634 // GO:0005730 // GO:0005737 // GO:0005813 // GO:0005829 // GO:0030892 // GO:0000775 // GO:0000776 // GO:0000922 // GO:0005634 // GO:0005694 // GO:0005737 // GO:0005815 // GO:0005856	chromosome, centromeric region // kinetochore // condensed chromosome kinetochore // condensed chromosome, centromeric region // condensed nuclear chromosome, centromeric region // spindle pole // nucleus // nucleolus // cytoplasm // centrosome // cytosol // mitotic cohesin complex // chromosome, centromeric region // kinetochore // spindle pole // nucleus // chromosome // cytoplasm // microtubul…	GO:0005515 // GO:0019900	protein binding // kinase binding	---	---	chrNA:-1--1	TC03001227.hg.1	7.42322	7.67458	7.72218	7.73567	7.58889	7.81523	8.34044	8.13022	8.06126	7.85866	7.91748	8.13913	9.47127	9.15422	9.48223	6.87765	7.11818	7.27986
261	TC03001359.hg.1	ALS2CL	NM_001190707	RefSeq	Homo sapiens ALS2 C-terminal like (ALS2CL), transcript variant 2, mRNA.	FALSE	chr3	GO:0007032 // GO:0008104 // GO:0032319 // GO:0043547 // GO:0032321 // GO:0035023	endosome organization // protein localization // regulation of Rho GTPase activity // positive regulation of GTPase activity // positive regulation of Rho GTPase activity // regulation of Rho protein signal transduction	GO:0016023 // GO:0005737	cytoplasmic membrane-bounded vesicle // cytoplasm	GO:0005089 // GO:0005096 // GO:0017137 // GO:0042802	Rho guanyl-nucleotide exchange factor activity // GTPase activator activity // Rab GTPase binding // identical protein binding	---	---	chrNA:-1--1	TC03001359.hg.1	6.95661	7.28457	7.31374	7.58897	7.64068	7.52679	6.07062	6.21424	6.09093	6.07989	6.22383	6.23635	7.28991	7.26776	7.33745	8.21947	8.6092	8.5533
262	TC03001374.hg.1	CDC25A	NM_001789	RefSeq	Homo sapiens cell division cycle 25A (CDC25A), transcript variant 1, mRNA.	FALSE	chr3	GO:0000079 // GO:0000082 // GO:0000086 // GO:0000278 // GO:0006260 // GO:0007067 // GO:0008283 // GO:0009314 // GO:0034644 // GO:0035335 // GO:0051726 // GO:0006470 // GO:0007049 // GO:0051301	regulation of cyclin-dependent protein serine/threonine kinase activity // G1/S transition of mitotic cell cycle // G2/M transition of mitotic cell cycle // mitotic cell cycle // DNA replication // mitotic nuclear division // cell proliferation // response to radiation // cellular response to UV // peptidyl-tyrosine dephosphorylation // regulation of cell cycle // protein dephosphorylation // cel…	GO:0005654 // GO:0005829 // GO:0005622 // GO:0005634 // GO:0005737	nucleoplasm // cytosol // intracellular // nucleus // cytoplasm	GO:0004725 // GO:0005515 // GO:0019901 // GO:0004721 // GO:0016787	protein tyrosine phosphatase activity // protein binding // protein kinase binding // phosphoprotein phosphatase activity // hydrolase activity	GenMAPP // GenMAPP	Cell_cycle_KEGG // G1_to_S_cell_cycle_Reactome	chrNA:-1--1	TC03001374.hg.1	5.61918	5.4743	5.48957	5.62241	5.73893	5.68566	6.74203	6.33202	6.49629	6.07795	6.34345	6.42769	7.15318	7.23706	6.86598	5.50687	5.08305	5.15687
263	TC03001403.hg.1	LAMB2P1	NR_004405	RefSeq	Homo sapiens laminin, beta 2 pseudogene 1 (LAMB2P1), non-coding RNA.	FALSE	chr3	---	---	---	---	---	---	---	---	chrNA:-1--1	TC03001403.hg.1	4.07001	3.58237	3.60183	4.34057	4.04887	4.06061	3.56401	3.95231	3.6779	4.28063	4.08732	4.59678	3.41072	3.73091	3.60607	4.33721	4.65132	4.7444
264	TC03001527.hg.1	ADAMTS9	NM_182920	RefSeq	Homo sapiens ADAM metallopeptidase with thrombospondin type 1 motif, 9 (ADAMTS9), mRNA.	FALSE	chr3	GO:0006508 // GO:0006516 // GO:0007275 // GO:0015031 // GO:0016192 // GO:0045636 // GO:0006508 // GO:0006810 // GO:0048070 // GO:0007229	proteolysis // glycoprotein catabolic process // multicellular organismal development // protein transport // vesicle-mediated transport // positive regulation of melanocyte differentiation // proteolysis // transport // regulation of developmental pigmentation // integrin-mediated signaling pathway	GO:0005578 // GO:0005615 // GO:0005783 // GO:0031012 // GO:0005576 // GO:0005578 // GO:0031012	proteinaceous extracellular matrix // extracellular space // endoplasmic reticulum // extracellular matrix // extracellular region // proteinaceous extracellular matrix // extracellular matrix	GO:0004222 // GO:0008237 // GO:0008270 // GO:0004175 // GO:0008233 // GO:0008237 // GO:0008237 // GO:0016787 // GO:0046872	metalloendopeptidase activity // metallopeptidase activity // zinc ion binding // endopeptidase activity // peptidase activity // metallopeptidase activity // metallopeptidase activity // hydrolase activity // metal ion binding	---	---	chrNA:-1--1	TC03001527.hg.1	6.99595	7.57852	7.06388	9.48705	9.68122	9.97467	5.60202	5.56732	5.88496	5.94013	6.25131	6.48224	4.98809	5.06078	4.957	5.34269	4.85138	4.89299
265	TC03001570.hg.1	ROBO1	NM_001145845	RefSeq	Homo sapiens roundabout, axon guidance receptor, homolog 1 (Drosophila) (ROBO1), transcript variant 4, mRNA.	FALSE	chr3	GO:0002042 // GO:0006919 // GO:0007155 // GO:0007156 // GO:0007399 // GO:0007411 // GO:0016199 // GO:0021836 // GO:0033600 // GO:0035385 // GO:0050772 // GO:0050925 // GO:0060763 // GO:0070100 // GO:0006935 // GO:0007275 // GO:0007399 // GO:0007411 // GO:0008285 // GO:0030154	cell migration involved in sprouting angiogenesis // activation of cysteine-type endopeptidase activity involved in apoptotic process // cell adhesion // homophilic cell adhesion // nervous system development // axon guidance // axon midline choice point recognition // chemorepulsion involved in postnatal olfactory bulb interneuron migration // negative regulation of mammary gland epithelial cell…	GO:0005737 // GO:0005886 // GO:0005887 // GO:0009986 // GO:0030673 // GO:0016020 // GO:0016021	cytoplasm // plasma membrane // integral component of plasma membrane // cell surface // axolemma // membrane // integral component of membrane	GO:0005515 // GO:0008046 // GO:0030275 // GO:0042802 // GO:0046982	protein binding // axon guidance receptor activity // LRR domain binding // identical protein binding // protein heterodimerization activity	---	---	chrNA:-1--1	TC03001570.hg.1	8.87681	9.45903	9.15391	7.74547	7.47381	7.54021	7.16752	7.23027	7.47272	6.63995	6.45317	6.64978	7.02846	7.28126	7.31993	7.2574	7.50942	7.54442
266	TC03001632.hg.1	KIAA1524	NM_020890	RefSeq	Homo sapiens KIAA1524 (KIAA1524), mRNA.	FALSE	chr3	---	---	GO:0005737 // GO:0005886 // GO:0016021 // GO:0005737 // GO:0016020	cytoplasm // plasma membrane // integral component of membrane // cytoplasm // membrane	GO:0005515	protein binding	---	---	chrNA:-1--1	TC03001632.hg.1	7.95333	8.05753	7.92531	8.28257	8.22648	8.27784	9.42617	9.28782	9.30973	8.83757	9.26271	9.33113	9.42059	9.52476	9.60934	6.74778	7.17318	7.62596
267	TC03001651.hg.1	CCDC80	NM_199511	RefSeq	Homo sapiens coiled-coil domain containing 80 (CCDC80), transcript variant 1, mRNA.	FALSE	chr3	GO:0010811 // GO:0030198	positive regulation of cell-substrate adhesion // extracellular matrix organization	GO:0005604 // GO:0005614 // GO:0005576 // GO:0005578 // GO:0031012 // GO:0019031	basement membrane // interstitial matrix // extracellular region // proteinaceous extracellular matrix // extracellular matrix // viral envelope	GO:0001968 // GO:0008201 // GO:0005539	fibronectin binding // heparin binding // glycosaminoglycan binding	---	---	chrNA:-1--1	TC03001651.hg.1	7.16456	7.28653	7.0782	6.0996	5.93956	5.78658	9.59394	9.4063	9.33145	7.97392	8.30716	8.61714	6.94666	6.99082	7.27488	6.84039	6.90608	6.85173
268	TC03001690.hg.1	LRRC58	NM_001099678	RefSeq	Homo sapiens leucine rich repeat containing 58 (LRRC58), mRNA.	FALSE	chr3	---	---	---	---	---	---	---	---	chrNA:-1--1	TC03001690.hg.1	10.2944	10.4832	10.3467	11.2934	11.5517	11.2939	11.2418	11.336	11.2127	12.0545	12.7011	12.5219	11.3353	10.8683	11.1464	11.1509	11.2451	11.2867
269	TC03001695.hg.1	POLQ	NM_199420	RefSeq	Homo sapiens polymerase (DNA directed), theta (POLQ), mRNA.	FALSE	chr3	GO:0006200 // GO:0006261 // GO:0006261 // GO:0006261 // GO:0006281 // GO:0006260 // GO:0006281 // GO:0006974	ATP catabolic process // DNA-dependent DNA replication // DNA-dependent DNA replication // DNA-dependent DNA replication // DNA repair // DNA replication // DNA repair // cellular response to DNA damage stimulus	GO:0005654	nucleoplasm	GO:0003684 // GO:0003887 // GO:0004386 // GO:0005524 // GO:0043142 // GO:0000166 // GO:0003676 // GO:0003677 // GO:0003887 // GO:0003887 // GO:0016740 // GO:0016779	damaged DNA binding // DNA-directed DNA polymerase activity // helicase activity // ATP binding // single-stranded DNA-dependent ATPase activity // nucleotide binding // nucleic acid binding // DNA binding // DNA-directed DNA polymerase activity // DNA-directed DNA polymerase activity // transferase activity // nucleotidyltransferase activity	---	---	chrNA:-1--1	TC03001695.hg.1	7.00465	7.40254	7.34499	7.75625	7.71103	7.82766	8.17087	7.89338	8.12613	7.7958	8.07013	8.00041	8.32422	8.44665	8.61613	5.88488	6.166	6.23558
270	TC03001712.hg.1	PTPLB	NM_198402	RefSeq	Homo sapiens protein tyrosine phosphatase-like (proline instead of catalytic arginine), member b (PTPLB), mRNA.	FALSE	chr3	GO:0006633 // GO:0006629 // GO:0006631	fatty acid biosynthetic process // lipid metabolic process // fatty acid metabolic process	GO:0005789 // GO:0016021 // GO:0005783 // GO:0016020	endoplasmic reticulum membrane // integral component of membrane // endoplasmic reticulum // membrane	GO:0005515 // GO:0016829	protein binding // lyase activity	---	---	chrNA:-1--1	TC03001712.hg.1	11.4586	11.5384	11.3973	10.8233	10.5033	10.7786	13.0102	12.9476	12.9885	11.5726	11.4453	11.766	12.2507	12.2867	12.4991	11.5434	11.4626	11.4184
271	TC03001729.hg.1	RP11-379B18.5	OTTHUMT00000356335	Havana transcript	cdna:all chromosome:VEGA56:3:125862574:125887335:-1 Gene:OTTHUMG00000159585	FALSE	chr3	---	---	---	---	---	---	---	---	chrNA:-1--1	TC03001729.hg.1	6.18016	5.4123	5.62639	6.43912	6.35676	6.35339	6.33184	6.63289	6.83032	5.84131	6.45494	6.47438	6.05977	6.63878	6.78618	7.6686	7.5397	7.81648
272	TC03001750.hg.1	MGLL	NM_001003794	RefSeq	Homo sapiens monoglyceride lipase (MGLL), transcript variant 2, mRNA.	FALSE	chr3	GO:0006629 // GO:0006633 // GO:0006644 // GO:0006954 // GO:0007596 // GO:0009966 // GO:0019369 // GO:0019433 // GO:0019433 // GO:0030168 // GO:0036155 // GO:0044281 // GO:0046464 // GO:0046474 // GO:0050727 // GO:0051930 // GO:0060292 // GO:2000124 // GO:0006629 // GO:0006631 // GO:0009966 // GO:0016042 // GO:0019369 // GO:0046464 // GO:0050727 // GO:0051930 // GO:2000124	lipid metabolic process // fatty acid biosynthetic process // phospholipid metabolic process // inflammatory response // blood coagulation // regulation of signal transduction // arachidonic acid metabolic process // triglyceride catabolic process // triglyceride catabolic process // platelet activation // acylglycerol acyl-chain remodeling // small molecule metabolic process // acylglycerol cata…	GO:0005789 // GO:0005886 // GO:0045202	endoplasmic reticulum membrane // plasma membrane // synapse	GO:0004622 // GO:0008289 // GO:0042803 // GO:0047372 // GO:0047372 // GO:0016787 // GO:0047372	lysophospholipase activity // lipid binding // protein homodimerization activity // acylglycerol lipase activity // acylglycerol lipase activity // hydrolase activity // acylglycerol lipase activity	---	---	chrNA:-1--1	TC03001750.hg.1	5.84627	5.83044	6.03943	6.85297	7.06109	6.85961	5.54319	5.62292	5.38163	5.7573	5.46987	5.56407	5.5156	5.52331	5.5257	5.7874	5.32124	5.34912
273	TC03001800.hg.1	SLCO2A1	NM_005630	RefSeq	Homo sapiens solute carrier organic anion transporter family, member 2A1 (SLCO2A1), mRNA.	FALSE	chr3	GO:0006869 // GO:0015732 // GO:0043252 // GO:0055085 // GO:0006810	lipid transport // prostaglandin transport // sodium-independent organic anion transport // transmembrane transport // transport	GO:0005886 // GO:0005887 // GO:0016020 // GO:0005886 // GO:0016020 // GO:0016021	plasma membrane // integral component of plasma membrane // membrane // plasma membrane // membrane // integral component of membrane	GO:0005319 // GO:0015132 // GO:0005215	lipid transporter activity // prostaglandin transmembrane transporter activity // transporter activity	---	---	chrNA:-1--1	TC03001800.hg.1	7.47898	7.51423	7.26685	6.30011	6.14722	6.16319	6.05202	5.99747	6.21525	6.63091	6.49371	6.75685	5.67573	5.58593	5.69903	5.75613	5.33802	5.43676
274	TC03001849.hg.1	TFDP2	NM_001178138	RefSeq	Homo sapiens transcription factor Dp-2 (E2F dimerization partner 2) (TFDP2), transcript variant 1, mRNA.	FALSE	chr3	GO:0000278 // GO:0006351 // GO:0006367 // GO:0007179 // GO:0007219 // GO:0007507 // GO:0010467 // GO:0045944 // GO:0000278 // GO:0006351 // GO:0006355 // GO:0007049 // GO:2001141	mitotic cell cycle // transcription, DNA-templated // transcription initiation from RNA polymerase II promoter // transforming growth factor beta receptor signaling pathway // Notch signaling pathway // heart development // gene expression // positive regulation of transcription from RNA polymerase II promoter // mitotic cell cycle // transcription, DNA-templated // regulation of transcription, D…	GO:0005654 // GO:0005667 // GO:0005634	nucleoplasm // transcription factor complex // nucleus	GO:0003677 // GO:0003700 // GO:0003712 // GO:0008134 // GO:0019904 // GO:0003677 // GO:0003700 // GO:0003712 // GO:0008134	DNA binding // sequence-specific DNA binding transcription factor activity // transcription cofactor activity // transcription factor binding // protein domain specific binding // DNA binding // sequence-specific DNA binding transcription factor activity // transcription cofactor activity // transcription factor binding	GenMAPP	G1_to_S_cell_cycle_Reactome	chrNA:-1--1	TC03001849.hg.1	7.69296	7.83169	7.65063	6.82872	6.6452	6.77044	7.36387	7.13725	7.07209	7.39596	7.17513	7.43138	7.04644	7.00648	6.95115	7.21299	7.21264	7.23284
275	TC03001851.hg.1	XRN1	NM_001042604	RefSeq	[retired]Homo sapiens 5-3 exoribonuclease 1 (XRN1), transcript variant 2, mRNA.	FALSE	chr3	---	---	---	---	---	---	---	---	chrNA:-1--1	TC03001851.hg.1	8.81521	9.02539	8.93387	9.00311	8.80007	8.99563	8.68504	9.03194	9.35804	9.09437	9.15372	9.63445	8.65745	8.48023	8.83268	9.32794	10.0203	9.92462
276	TC03001867.hg.1	PLSCR4	NM_001128304	RefSeq	Homo sapiens phospholipid scramblase 4 (PLSCR4), transcript variant 1, mRNA.	FALSE	chr3	GO:0017121 // GO:0071222	phospholipid scrambling // cellular response to lipopolysaccharide	GO:0005886 // GO:0016021 // GO:0070062 // GO:0016020	plasma membrane // integral component of membrane // extracellular vesicular exosome // membrane	GO:0005509 // GO:0005515 // GO:0017124 // GO:0017128 // GO:0019899 // GO:0042609	calcium ion binding // protein binding // SH3 domain binding // phospholipid scramblase activity // enzyme binding // CD4 receptor binding	---	---	chrNA:-1--1	TC03001867.hg.1	6.2493	6.27176	6.27606	5.66015	5.64682	5.34783	11.8749	11.7502	11.7127	10.6532	10.6868	10.8339	5.13249	5.26759	5.21224	5.69416	5.12353	5.14347
277	TC03001933.hg.1	SSR3	NM_007107	RefSeq	Homo sapiens signal sequence receptor, gamma (translocon-associated protein gamma) (SSR3), mRNA.	FALSE	chr3	GO:0006412 // GO:0006614 // GO:0010467 // GO:0044267 // GO:0006613	translation // SRP-dependent cotranslational protein targeting to membrane // gene expression // cellular protein metabolic process // cotranslational protein targeting to membrane	GO:0005784 // GO:0030176 // GO:0005783 // GO:0005789 // GO:0016020 // GO:0016021	Sec61 translocon complex // integral component of endoplasmic reticulum membrane // endoplasmic reticulum // endoplasmic reticulum membrane // membrane // integral component of membrane	---	---	---	---	chrNA:-1--1	TC03001933.hg.1	10.5207	10.4497	10.1795	11.6952	11.5522	11.5877	10.4973	10.6447	10.6347	10.4737	10.1495	10.7684	10.3103	10.3921	10.4206	10.0174	10.1974	10.0361
278	TC03002006.hg.1	TNFSF10	NM_001190942	RefSeq	Homo sapiens tumor necrosis factor (ligand) superfamily, member 10 (TNFSF10), transcript variant 2, mRNA.	FALSE	chr3	GO:0006915 // GO:0006919 // GO:0006955 // GO:0007165 // GO:0007267 // GO:0008584 // GO:0032868 // GO:0043065 // GO:0043123 // GO:0043280 // GO:0090200 // GO:0097190 // GO:2001238 // GO:2001239 // GO:0006915 // GO:0043065	apoptotic process // activation of cysteine-type endopeptidase activity involved in apoptotic process // immune response // signal transduction // cell-cell signaling // male gonad development // response to insulin // positive regulation of apoptotic process // positive regulation of I-kappaB kinase/NF-kappaB signaling // positive regulation of cysteine-type endopeptidase activity involved in ap…	GO:0005576 // GO:0005615 // GO:0005887 // GO:0070062 // GO:0016020 // GO:0016021	extracellular region // extracellular space // integral component of plasma membrane // extracellular vesicular exosome // membrane // integral component of membrane	GO:0005102 // GO:0005125 // GO:0005164 // GO:0005515 // GO:0046872 // GO:0032813	receptor binding // cytokine activity // tumor necrosis factor receptor binding // protein binding // metal ion binding // tumor necrosis factor receptor superfamily binding	GenMAPP // GenMAPP	Apoptosis // Apoptosis_GenMAPP	chrNA:-1--1	TC03002006.hg.1	8.23706	8.59486	8.46021	6.09591	5.46965	5.25539	7.78758	9.74679	10.2494	9.35271	9.37764	9.42313	6.55188	6.69465	6.7936	5.50785	5.99259	6.05735
279	TC03002008.hg.1	NCEH1	NM_001146276	RefSeq	Homo sapiens neutral cholesterol ester hydrolase 1 (NCEH1), transcript variant 1, mRNA.	FALSE	chr3	GO:0016042 // GO:0006629 // GO:0008152	lipid catabolic process // lipid metabolic process // metabolic process	GO:0005783 // GO:0016021 // GO:0016020 // GO:0016020 // GO:0043231	endoplasmic reticulum // integral component of membrane // membrane // membrane // intracellular membrane-bounded organelle	GO:0052689 // GO:0016787	carboxylic ester hydrolase activity // hydrolase activity	---	---	chrNA:-1--1	TC03002008.hg.1	9.76875	10.0924	9.69083	10.4467	10.4272	10.8285	9.07454	9.32887	9.46738	8.5794	8.83914	9.08843	8.78731	8.92072	9.21668	7.31524	7.41172	7.57212
280	TC03002083.hg.1	CRYGS	NM_017541	RefSeq	Homo sapiens crystallin, gamma S (CRYGS), mRNA.	FALSE	chr3	GO:0002009 // GO:0002088	morphogenesis of an epithelium // lens development in camera-type eye	---	---	GO:0005212	structural constituent of eye lens	---	---	chrNA:-1--1	TC03002083.hg.1	6.53039	6.59133	6.52306	6.80304	6.835	6.83989	6.13885	5.98325	6.11135	7.0255	7.13799	6.91355	6.63945	6.581	6.87627	5.97573	5.82787	6.37368
281	TC03002088.hg.1	RFC4	NM_002916	RefSeq	Homo sapiens replication factor C (activator 1) 4, 37kDa (RFC4), transcript variant 1, mRNA.	FALSE	chr3	GO:0000278 // GO:0000722 // GO:0000723 // GO:0006260 // GO:0006260 // GO:0006271 // GO:0006281 // GO:0006281 // GO:0006283 // GO:0006289 // GO:0006297 // GO:0032201 // GO:0048015 // GO:0006260 // GO:0008152	mitotic cell cycle // telomere maintenance via recombination // telomere maintenance // DNA replication // DNA replication // DNA strand elongation involved in DNA replication // DNA repair // DNA repair // transcription-coupled nucleotide-excision repair // nucleotide-excision repair // nucleotide-excision repair, DNA gap filling // telomere maintenance via semi-conservative replication // phosp…	GO:0005654 // GO:0005663 // GO:0005634	nucleoplasm // DNA replication factor C complex // nucleus	GO:0003677 // GO:0005515 // GO:0005524 // GO:0017111 // GO:0000166	DNA binding // protein binding // ATP binding // nucleoside-triphosphatase activity // nucleotide binding	GenMAPP	DNA_replication_Reactome	chrNA:-1--1	TC03002088.hg.1	9.39058	9.25831	9.22648	9.1773	9.18712	9.18331	10.4826	10.7067	10.4815	10.9508	10.9475	11.1529	10.5375	10.6067	10.4585	8.42256	8.30001	8.36356
282	TC03002106.hg.1	LEPREL1	NM_001134418	RefSeq	Homo sapiens leprecan-like 1 (LEPREL1), transcript variant 2, mRNA.	FALSE	chr3	GO:0008285 // GO:0019511 // GO:0030198 // GO:0032963 // GO:0055114	negative regulation of cell proliferation // peptidyl-proline hydroxylation // extracellular matrix organization // collagen metabolic process // oxidation-reduction process	GO:0005604 // GO:0005783 // GO:0005788 // GO:0005794 // GO:0005604 // GO:0005783 // GO:0005794	basement membrane // endoplasmic reticulum // endoplasmic reticulum lumen // Golgi apparatus // basement membrane // endoplasmic reticulum // Golgi apparatus	GO:0005506 // GO:0019797 // GO:0031418 // GO:0016491 // GO:0016705 // GO:0016706 // GO:0019797 // GO:0046872 // GO:0051213	iron ion binding // procollagen-proline 3-dioxygenase activity // L-ascorbic acid binding // oxidoreductase activity // oxidoreductase activity, acting on paired donors, with incorporation or reduction of molecular oxygen // oxidoreductase activity, acting on paired donors, with incorporation or reduction of molecular oxygen, 2-oxoglutarate as one donor, and incorporation of one atom each of oxyg…	---	---	chrNA:-1--1	TC03002106.hg.1	8.3162	8.57194	8.18068	6.9013	6.45109	6.5315	5.79659	6.23097	5.99302	5.67495	6.08146	6.37142	6.48142	6.68175	6.67084	6.5891	6.66855	6.45982
283	TC03002169.hg.1	RNU6-42P	ENST00000384165	ENSEMBL	ncrna:known chromosome:GRCh38:3:196784980:196785086:-1 gene:ENSG00000206892 gene_biotype:snRNA transcript_biotype:snRNA	FALSE	chr3	---	---	---	---	---	---	---	---	chrNA:-1--1	TC03002169.hg.1	9.59864	9.98313	9.91446	10.6378	10.459	10.493	9.12863	8.99786	9.19179	7.88903	7.97295	8.19034	8.27614	8.74511	8.91768	8.76653	8.49679	8.45594
284	TC03002211.hg.1	TTLL3	NR_037162	NONCODE	accn=NR_037162 class=lncRNA name= ref=RefGeneNoncode transcriptId=NR_037162 cpcScore=8.5780500 cnci=-0.1415761	FALSE	chr3	GO:0018094 // GO:0035082 // GO:0042384 // GO:0006464	protein polyglycylation // axoneme assembly // cilium assembly // cellular protein modification process	GO:0005874 // GO:0005929 // GO:0005930 // GO:0015630 // GO:0005737 // GO:0005856 // GO:0005929 // GO:0042995	microtubule // cilium // axoneme // microtubule cytoskeleton // cytoplasm // cytoskeleton // cilium // cell projection	GO:0070735 // GO:0070736 // GO:0016874	protein-glycine ligase activity // protein-glycine ligase activity, initiating // ligase activity	---	---	chrNA:-1--1	TC03002211.hg.1	9.15497	10.1631	10.0016	10.112	10.1518	10.2448	6.91221	7.10007	6.96878	7.41159	6.78135	7.57613	6.78685	7.05257	7.04958	8.25333	8.9299	8.91507
285	TC03002221.hg.1	---	TCONS_l2_00018438-XLOC_l2_009623	Broad TUCP	linc-SYN2 chr3:+:11912785-11926479	FALSE	chr3	---	---	---	---	---	---	---	---	chrNA:-1--1	TC03002221.hg.1	11.8266	12.3308	11.955	12.3832	12.4804	12.5846	8.08155	8.68555	8.60035	8.46197	8.68456	9.40772	9.37857	9.43532	9.9944	7.16565	7.82446	7.7879
286	TC03002223.hg.1	---	AK027107	NONCODE	accn=AK027107 class=mRNAlike lncRNA name=Human lncRNA ref=JounralRNA transcriptId=1682 cpcScore=-1.0718700 cnci=-0.2886534	FALSE	chr3	---	---	---	---	---	---	---	---	chrNA:-1--1	TC03002223.hg.1	11.4317	11.3916	11.5953	10.0877	9.77898	9.8855	7.78734	7.53394	6.55209	7.32603	7.27119	7.55244	10.3807	9.73389	9.98998	9.95959	10.4431	10.6808
287	TC03002251.hg.1	---	TCONS_l2_00019768-XLOC_l2_009645	Broad TUCP	linc-UBE2E2-1 chr3:+:22423309-22423829	FALSE	chr3	---	---	---	---	---	---	---	---	chrNA:-1--1	TC03002251.hg.1	14.7159	14.8911	15.7035	14.5161	14.3547	15.0862	16.3745	16.0222	15.9653	15.8401	15.4123	16.0788	17.453	17.4239	16.9726	15.8189	15.7869	15.8425
288	TC03002252.hg.1	---	uc003ccf.2	NONCODE	accn=NULL class=lncRNA name= ref=UCSCGeneNoncode transcriptId=uc003ccf.2 cpcScore=-1.1670700 cnci=-0.4967439	FALSE	chr3	---	---	---	---	---	---	---	---	chrNA:-1--1	TC03002252.hg.1	17.6657	17.7561	17.2844	16.8222	16.59	17.0927	17.6862	17.687	17.4647	17.4318	17.7564	17.7024	19.1518	18.7443	18.7374	17.6259	17.302	17.5542
289	TC03002313.hg.1	---	AK124776	NONCODE	accn=AK124776 class=mRNAlike lncRNA name=Human lncRNA ref=JounralRNA transcriptId=1771 cpcScore=-0.5664690 cnci=-0.2612166	FALSE	chr3	---	---	---	---	---	---	---	---	chrNA:-1--1	TC03002313.hg.1	5.7548	5.9497	5.52592	7.36756	7.57144	7.79636	7.78237	7.88986	8.22269	7.44826	7.56693	7.83229	7.86848	8.28269	8.26305	7.50005	8.19273	8.23885
290	TC03002466.hg.1	---	AK092456	NONCODE	accn=AK092456 class=mRNAlike lncRNA name=Human lncRNA ref=JounralRNA transcriptId=1854 cpcScore=-1.1842400 cnci=-0.2874685	FALSE	chr3	---	---	---	---	---	---	---	---	chrNA:-1--1	TC03002466.hg.1	8.25955	8.73259	8.60836	10.3743	10.142	9.83858	6.89139	6.83056	6.17295	6.17063	6.11585	7.33864	7.5719	7.78452	7.87627	8.78404	8.70022	8.54266
291	TC03002562.hg.1	---	linc_luo_1354	NONCODE	accn=NULL class=lincRNA name=Human lincRNA ref=Scripture Reconstruction LincRNAs By Luo transcriptId=linc_luo_1354 cpcScore=-1.5523700 cnci=-0.4308465	FALSE	chr3	---	---	---	---	---	---	---	---	chrNA:-1--1	TC03002562.hg.1	5.41988	5.64982	5.75258	6.11814	5.37522	6.16782	5.70436	5.76457	6.00135	6.42288	6.35819	6.76822	6.33603	5.90428	7.10247	9.18607	8.84853	8.9217
292	TC03002706.hg.1	LOC344887	NR_033752	NONCODE	accn=NR_033752 class=lncRNA name= ref=RefGeneNoncode transcriptId=NR_033752 cpcScore=3.0095800 cnci=-0.2538672	FALSE	chr3	---	---	---	---	---	---	---	---	chrNA:-1--1	TC03002706.hg.1	4.76599	4.85762	5.07922	6.52975	6.6288	6.61194	6.07308	6.0573	5.62915	6.26241	6.33066	6.67858	10.1334	10.208	10.1205	10.4982	11.7829	11.4796
293	TC03002724.hg.1	CCDC50	AK055652	NONCODE	accn=AK055652 class=mRNAlike lncRNA name=Human lncRNA ref=JounralRNA transcriptId=2188 cpcScore=-1.1308000 cnci=-0.3698997	FALSE	chr3	---	---	GO:0005737 // GO:0005737	cytoplasm // cytoplasm	GO:0005515	protein binding	---	---	chrNA:-1--1	TC03002724.hg.1	7.41981	7.06044	7.22841	6.68334	6.52221	6.74216	8.76372	8.42348	8.30216	8.46909	9.47462	9.55747	6.90355	6.70589	7.01147	7.81302	7.92252	7.87282
294	TC03002739.hg.1	---	uc003fug.2	NONCODE	accn=NULL class=lncRNA name= ref=UCSCGeneNoncode transcriptId=uc003fug.2 cpcScore=-0.9876670 cnci=-0.2575903	FALSE	chr3	---	---	---	---	---	---	---	---	chrNA:-1--1	TC03002739.hg.1	5.20721	5.27399	5.27904	5.74679	5.44741	5.47785	5.59137	5.73201	5.51441	6.41637	6.23337	7.37501	5.36785	5.65461	5.60592	6.94472	6.56507	6.76571
295	TC03002794.hg.1	RAD18	AK123966	NONCODE	accn=AK123966 class=mRNAlike lncRNA name=Human lncRNA ref=JounralRNA transcriptId=1677 cpcScore=-0.9132660 cnci=-0.2927124	FALSE	chr3	GO:0006281 // GO:0007283 // GO:0009411 // GO:0016567 // GO:0045910 // GO:0006281 // GO:0006974	DNA repair // spermatogenesis // response to UV // protein ubiquitination // negative regulation of DNA recombination // DNA repair // cellular response to DNA damage stimulus	GO:0000785 // GO:0001741 // GO:0005634 // GO:0005657 // GO:0005634	chromatin // XY body // nucleus // replication fork // nucleus	GO:0000403 // GO:0003684 // GO:0005515 // GO:0008270 // GO:0016874 // GO:0031593 // GO:0031625 // GO:0003676 // GO:0003677 // GO:0046872	Y-form DNA binding // damaged DNA binding // protein binding // zinc ion binding // ligase activity // polyubiquitin binding // ubiquitin protein ligase binding // nucleic acid binding // DNA binding // metal ion binding	---	---	chrNA:-1--1	TC03002794.hg.1	8.83028	8.56369	8.52478	8.99524	8.95178	8.84795	9.73358	9.21667	9.45508	8.51905	8.49132	9.17995	9.54481	9.29435	9.63041	7.28969	8.00969	7.9783
296	TC03002889.hg.1	ALS2CL	NR_033815	NONCODE	accn=NR_033815 class=lncRNA name= ref=RefGeneNoncode transcriptId=NR_033815 cpcScore=9.5968700 cnci=-0.1350098	FALSE	chr3	GO:0007032 // GO:0008104 // GO:0032319 // GO:0043547 // GO:0032321 // GO:0035023	endosome organization // protein localization // regulation of Rho GTPase activity // positive regulation of GTPase activity // positive regulation of Rho GTPase activity // regulation of Rho protein signal transduction	GO:0016023 // GO:0005737	cytoplasmic membrane-bounded vesicle // cytoplasm	GO:0005089 // GO:0005096 // GO:0017137 // GO:0042802	Rho guanyl-nucleotide exchange factor activity // GTPase activator activity // Rab GTPase binding // identical protein binding	---	---	chrNA:-1--1	TC03002889.hg.1	6.45921	6.90381	6.7458	7.13321	7.17631	7.17001	5.70335	5.75004	5.68335	5.47385	5.7008	5.80182	6.79136	6.83676	6.89525	7.90226	8.44142	8.40999
297	TC03002895.hg.1	---	CR619601	NONCODE	accn=CR619601 class=mRNAlike lncRNA name=NULL ref=H-invitational v7.5 transcriptId=HIT000298796 cpcScore=-0.8502660 cnci=-0.1398763	FALSE	chr3	---	---	---	---	---	---	---	---	chrNA:-1--1	TC03002895.hg.1	10.0241	10.5609	9.95593	8.87547	8.82051	8.88156	10.7701	10.7988	10.4189	9.65923	9.39889	9.73863	10.3797	10.2462	10.3412	8.67438	9.22196	9.45141
298	TC03002978.hg.1	---	TCONS_00006544-XLOC_003164	Rinn lincRNA	linc-CNTN3-1 chr3:-:75691157-75695597	FALSE	chr3	---	---	---	---	---	---	---	---	chrNA:-1--1	TC03002978.hg.1	3.78678	3.69391	3.84102	3.36898	4.02271	3.36404	3.93809	3.69698	3.78064	4.47367	4.28908	4.93319	3.48278	3.90361	3.29711	4.90649	4.21052	4.50192
299	TC03003060.hg.1	ZNF148	BC016316	NONCODE	accn=BC016316 class=mRNAlike lncRNA name=Human lncRNA ref=JounralRNA transcriptId=1951 cpcScore=-1.0507600 cnci=-0.4515793	FALSE	chr3	GO:0000122 // GO:0006366 // GO:0006461 // GO:0006968 // GO:0007276 // GO:0010629 // GO:0021762 // GO:0045892 // GO:0045944 // GO:0000122 // GO:0006351 // GO:0006355 // GO:0006355 // GO:0045893	negative regulation of transcription from RNA polymerase II promoter // transcription from RNA polymerase II promoter // protein complex assembly // cellular defense response // gamete generation // negative regulation of gene expression // substantia nigra development // negative regulation of transcription, DNA-templated // positive regulation of transcription from RNA polymerase II promoter //…	GO:0005634 // GO:0005634	nucleus // nucleus	GO:0000976 // GO:0003690 // GO:0003700 // GO:0005515 // GO:0043565 // GO:0046872 // GO:0003676 // GO:0003677	transcription regulatory region sequence-specific DNA binding // double-stranded DNA binding // sequence-specific DNA binding transcription factor activity // protein binding // sequence-specific DNA binding // metal ion binding // nucleic acid binding // DNA binding	---	---	chrNA:-1--1	TC03003060.hg.1	6.84608	7.09538	5.8508	6.95707	7.33864	7.18731	5.97332	6.49056	6.36145	7.98961	8.46836	8.13453	7.48934	6.48365	6.95029	7.38502	8.23631	7.86491
300	TC03003071.hg.1	ZXDC	AK095149	NONCODE	accn=AK095149 class=mRNAlike lncRNA name=Human lncRNA ref=JounralRNA transcriptId=1956 cpcScore=-1.2148000 cnci=-0.2270072	FALSE	chr3	GO:0006351 // GO:0045893 // GO:0045893 // GO:0006355	transcription, DNA-templated // positive regulation of transcription, DNA-templated // positive regulation of transcription, DNA-templated // regulation of transcription, DNA-templated	GO:0005634 // GO:0005575	nucleus // cellular_component	GO:0003676 // GO:0003700 // GO:0005515 // GO:0030275 // GO:0046872 // GO:0070742	nucleic acid binding // sequence-specific DNA binding transcription factor activity // protein binding // LRR domain binding // metal ion binding // C2H2 zinc finger domain binding	---	---	chrNA:-1--1	TC03003071.hg.1	6.17778	6.13108	6.23856	6.78996	6.79465	6.78879	5.9108	6.15958	5.54804	6.57219	6.5774	7.10044	5.90253	6.04954	6.06515	6.27656	5.74805	5.42485
301	TC03003211.hg.1	TNFSF10	NR_033994	NONCODE	accn=NR_033994 class=lncRNA name= ref=RefGeneNoncode transcriptId=NR_033994 cpcScore=3.1503400 cnci=-0.3031873	FALSE	chr3	GO:0006915 // GO:0006919 // GO:0006955 // GO:0007165 // GO:0007267 // GO:0008584 // GO:0032868 // GO:0043065 // GO:0043123 // GO:0043280 // GO:0090200 // GO:0097190 // GO:2001238 // GO:2001239 // GO:0006915 // GO:0043065	apoptotic process // activation of cysteine-type endopeptidase activity involved in apoptotic process // immune response // signal transduction // cell-cell signaling // male gonad development // response to insulin // positive regulation of apoptotic process // positive regulation of I-kappaB kinase/NF-kappaB signaling // positive regulation of cysteine-type endopeptidase activity involved in ap…	GO:0005576 // GO:0005615 // GO:0005887 // GO:0070062 // GO:0016020 // GO:0016021	extracellular region // extracellular space // integral component of plasma membrane // extracellular vesicular exosome // membrane // integral component of membrane	GO:0005102 // GO:0005125 // GO:0005164 // GO:0005515 // GO:0046872 // GO:0032813	receptor binding // cytokine activity // tumor necrosis factor receptor binding // protein binding // metal ion binding // tumor necrosis factor receptor superfamily binding	GenMAPP // GenMAPP	Apoptosis // Apoptosis_GenMAPP	chrNA:-1--1	TC03003211.hg.1	8.72197	9.32886	9.1076	5.50165	4.86264	4.62306	8.22035	10.9852	11.1872	10.2849	10.4884	11.3847	6.82789	7.12699	7.33252	5.06112	6.20343	6.24981
302	TC03003292.hg.1	---	linc_luo_1808	NONCODE	accn=NULL class=lincRNA name=Human lincRNA ref=Scripture Reconstruction LincRNAs By Luo transcriptId=linc_luo_1808 cpcScore=-1.6592400 cnci=-0.1468954	FALSE	chr3	---	---	---	---	---	---	---	---	chrNA:-1--1	TC03003292.hg.1	7.28125	7.27502	7.31107	7.19711	7.06026	7.42029	8.88888	9.00277	9.11431	8.87194	8.63641	9.83323	8.04082	8.49707	7.6783	9.27571	9.66719	9.45954
303	TC03003322.hg.1	UPK1B	NM_006952	RefSeq	Homo sapiens uroplakin 1B (UPK1B), mRNA.	FALSE	chr3	GO:0030855	epithelial cell differentiation	GO:0016021 // GO:0016324 // GO:0070062 // GO:0016020 // GO:0016021	integral component of membrane // apical plasma membrane // extracellular vesicular exosome // membrane // integral component of membrane	GO:0005198	structural molecule activity	---	---	chrNA:-1--1	TC03003322.hg.1	9.72151	9.8507	9.64562	7.57844	6.84506	6.35923	5.5319	5.42431	5.08894	4.96915	5.20948	5.34196	9.883	9.94051	10.3316	8.46354	9.18184	8.7156
304	TC03003372.hg.1	SRGAP3	NM_001033117	RefSeq	Homo sapiens SLIT-ROBO Rho GTPase activating protein 3 (SRGAP3), transcript variant 2, mRNA.	FALSE	chr3	GO:0007264 // GO:0043547 // GO:0051056 // GO:0007165	small GTPase mediated signal transduction // positive regulation of GTPase activity // regulation of small GTPase mediated signal transduction // signal transduction	GO:0005829 // GO:0005622	cytosol // intracellular	GO:0005096 // GO:0005515	GTPase activator activity // protein binding	---	---	chrNA:-1--1	TC03003372.hg.1	7.44116	7.75625	7.41588	6.98955	6.70977	6.73776	5.3724	5.35852	5.38803	5.34467	5.34502	5.66853	6.74799	6.67794	6.8458	7.41625	8.13273	8.15517
305	TC04000030.hg.1	WHSC1	NM_001042424	RefSeq	Homo sapiens Wolf-Hirschhorn syndrome candidate 1 (WHSC1), transcript variant 10, mRNA.	FALSE	chr4	GO:0000122 // GO:0003149 // GO:0003289 // GO:0003290 // GO:0006351 // GO:0009653 // GO:0034968 // GO:0060348 // GO:0006355 // GO:0016568 // GO:0032259	negative regulation of transcription from RNA polymerase II promoter // membranous septum morphogenesis // atrial septum primum morphogenesis // atrial septum secundum morphogenesis // transcription, DNA-templated // anatomical structure morphogenesis // histone lysine methylation // bone development // regulation of transcription, DNA-templated // chromatin modification // methylation	GO:0005634 // GO:0005694 // GO:0005730 // GO:0005737 // GO:0031965 // GO:0005634	nucleus // chromosome // nucleolus // cytoplasm // nuclear membrane // nucleus	GO:0003677 // GO:0003682 // GO:0005515 // GO:0008270 // GO:0018024 // GO:0008168 // GO:0016740 // GO:0046872	DNA binding // chromatin binding // protein binding // zinc ion binding // histone-lysine N-methyltransferase activity // methyltransferase activity // transferase activity // metal ion binding	---	---	chrNA:-1--1	TC04000030.hg.1	8.3047	8.7483	8.63389	9.0962	8.98844	9.23967	10.2113	9.80753	10.0073	9.56945	9.55117	9.99069	8.94424	8.98008	9.18098	7.15456	7.51005	7.44133
306	TC04000155.hg.1	NCAPG	NM_022346	RefSeq	Homo sapiens non-SMC condensin I complex, subunit G (NCAPG), transcript variant 1, mRNA.	FALSE	chr4	GO:0000278 // GO:0007076 // GO:0007076 // GO:0007049 // GO:0007067 // GO:0007076 // GO:0030261 // GO:0051301	mitotic cell cycle // mitotic chromosome condensation // mitotic chromosome condensation // cell cycle // mitotic nuclear division // mitotic chromosome condensation // chromosome condensation // cell division	GO:0000796 // GO:0005634 // GO:0005737 // GO:0005813 // GO:0005829 // GO:0015629 // GO:0000793 // GO:0000796 // GO:0005634 // GO:0005694 // GO:0005737 // GO:0016020	condensin complex // nucleus // cytoplasm // centrosome // cytosol // actin cytoskeleton // condensed chromosome // condensin complex // nucleus // chromosome // cytoplasm // membrane	GO:0005515	protein binding	---	---	chrNA:-1--1	TC04000155.hg.1	10.2685	10.524	10.2737	9.69316	9.74057	9.83705	11.4595	11.2828	11.187	10.2128	10.7187	11.0924	11.3332	11.3469	11.6325	7.35751	7.67606	7.97312
307	TC04000158.hg.1	SLIT2	NM_004787	RefSeq	Homo sapiens slit homolog 2 (Drosophila) (SLIT2), transcript variant 1, mRNA.	FALSE	chr4	GO:0001656 // GO:0001657 // GO:0001701 // GO:0001933 // GO:0002042 // GO:0002689 // GO:0007411 // GO:0007411 // GO:0008045 // GO:0008285 // GO:0010593 // GO:0010596 // GO:0010629 // GO:0014912 // GO:0016337 // GO:0021834 // GO:0021836 // GO:0021972 // GO:0030308 // GO:0030336 // GO:0030336 // GO:0030837 // GO:0031290 // GO:0032870 // GO:0033563 // GO:0035385 // GO:0035385 // GO:0043065 // GO:0043…	metanephros development // ureteric bud development // in utero embryonic development // negative regulation of protein phosphorylation // cell migration involved in sprouting angiogenesis // negative regulation of leukocyte chemotaxis // axon guidance // axon guidance // motor neuron axon guidance // negative regulation of cell proliferation // negative regulation of lamellipodium assembly // ne…	GO:0005576 // GO:0005615 // GO:0005737 // GO:0005886 // GO:0009986 // GO:0016020 // GO:0070062 // GO:0005576 // GO:0005615	extracellular region // extracellular space // cytoplasm // plasma membrane // cell surface // membrane // extracellular vesicular exosome // extracellular region // extracellular space	GO:0005095 // GO:0005509 // GO:0005515 // GO:0008201 // GO:0042802 // GO:0042803 // GO:0043237 // GO:0043394 // GO:0045499 // GO:0048495 // GO:0005509 // GO:0008201	GTPase inhibitor activity // calcium ion binding // protein binding // heparin binding // identical protein binding // protein homodimerization activity // laminin-1 binding // proteoglycan binding // chemorepellent activity // Roundabout binding // calcium ion binding // heparin binding	---	---	chrNA:-1--1	TC04000158.hg.1	6.93099	7.23566	7.09382	6.90126	6.93785	7.22167	10.722	10.6221	10.9011	8.90918	9.11554	9.36986	5.20084	5.33943	5.19416	5.52861	5.03413	5.12944
308	TC04000196.hg.1	PCDH7	NM_001173523	RefSeq	Homo sapiens protocadherin 7 (PCDH7), transcript variant d, mRNA.	FALSE	chr4	GO:0007156 // GO:0007155	homophilic cell adhesion // cell adhesion	GO:0005886 // GO:0005887 // GO:0005886 // GO:0016020 // GO:0016021	plasma membrane // integral component of plasma membrane // plasma membrane // membrane // integral component of membrane	GO:0005509	calcium ion binding	---	---	chrNA:-1--1	TC04000196.hg.1	6.60572	6.90996	6.55833	5.5216	5.51006	5.42878	8.38556	8.60361	8.53566	7.03205	6.91995	7.23772	7.76977	7.7281	7.79291	7.97572	8.34762	8.45603
309	TC04000258.hg.1	DCAF4L1	NM_001029955	RefSeq	Homo sapiens DDB1 and CUL4 associated factor 4-like 1 (DCAF4L1), mRNA.	FALSE	chr4	---	---	---	---	---	---	---	---	chrNA:-1--1	TC04000258.hg.1	5.28332	5.13429	5.16437	6.20615	6.02818	6.03731	5.05846	5.24688	5.42714	5.17655	5.14176	5.59045	5.31592	5.15245	5.18522	6.03212	5.42788	5.31818
310	TC04000265.hg.1	RP11-1E6.1	OTTHUMT00000360574	Havana transcript	cdna:all chromosome:VEGA56:4:43340875:43345600:1 Gene:OTTHUMG00000160433	FALSE	chr4	---	---	---	---	---	---	---	---	chrNA:-1--1	TC04000265.hg.1	9.28715	9.06227	8.39021	6.30106	6.16064	5.96838	4.124	3.85668	3.37008	3.80951	3.94287	4.17833	4.75419	5.32661	5.77179	4.2059	4.52864	4.6847
311	TC04000285.hg.1	---	ENST00000408488	ENSEMBL	ncrna:novel chromosome:GRCh38:4:49198207:49198289:1 gene:ENSG00000221415 gene_biotype:miRNA transcript_biotype:miRNA	FALSE	chr4	---	---	---	---	---	---	---	---	chrNA:-1--1	TC04000285.hg.1	13.6119	13.6565	13.8764	15.5595	15.246	15.3615	13.9868	14.146	15.2285	13.2541	12.4703	13.0463	15.9357	16.4645	16.027	16.8739	16.9172	16.2482
312	TC04000351.hg.1	LPHN3	NM_015236	RefSeq	Homo sapiens latrophilin 3 (LPHN3), mRNA.	FALSE	chr4	GO:0007186 // GO:0007218 // GO:0007165 // GO:0007166 // GO:0007186 // GO:0007186	G-protein coupled receptor signaling pathway // neuropeptide signaling pathway // signal transduction // cell surface receptor signaling pathway // G-protein coupled receptor signaling pathway // G-protein coupled receptor signaling pathway	GO:0005886 // GO:0016021 // GO:0016020 // GO:0016021 // GO:0016021	plasma membrane // integral component of membrane // membrane // integral component of membrane // integral component of membrane	GO:0004930 // GO:0030246 // GO:0004871 // GO:0004888 // GO:0004930 // GO:0004930	G-protein coupled receptor activity // carbohydrate binding // signal transducer activity // transmembrane signaling receptor activity // G-protein coupled receptor activity // G-protein coupled receptor activity	GenMAPP // GenMAPP	GPCRDB_Class_B_Secretin-like // GPCRDB_Other	chrNA:-1--1	TC04000351.hg.1	6.11863	6.10567	6.00403	5.0283	4.91087	4.94154	5.11872	5.11381	4.9602	4.94791	5.22282	5.04543	4.94745	5.10629	4.83555	5.1301	5.07493	5.17422
313	TC04000408.hg.1	CXCL8	NM_000584	RefSeq	Homo sapiens chemokine (C-X-C motif) ligand 8 (CXCL8), mRNA.	FALSE	chr4	GO:0001525 // GO:0002237 // GO:0006928 // GO:0006935 // GO:0006954 // GO:0006955 // GO:0006987 // GO:0007050 // GO:0007165 // GO:0007186 // GO:0008285 // GO:0019722 // GO:0030155 // GO:0030593 // GO:0030968 // GO:0031623 // GO:0034976 // GO:0035556 // GO:0042119 // GO:0044267 // GO:0044344 // GO:0045091 // GO:0045744 // GO:0048566 // GO:0050930 // GO:0071222 // GO:0071347 // GO:0071356 // GO:0090…	angiogenesis // response to molecule of bacterial origin // cellular component movement // chemotaxis // inflammatory response // immune response // activation of signaling protein activity involved in unfolded protein response // cell cycle arrest // signal transduction // G-protein coupled receptor signaling pathway // negative regulation of cell proliferation // calcium-mediated signaling // r…	GO:0005576 // GO:0005615 // GO:0005576 // GO:0005615	extracellular region // extracellular space // extracellular region // extracellular space	GO:0005153 // GO:0005515 // GO:0008009 // GO:0005125 // GO:0005153 // GO:0008009	interleukin-8 receptor binding // protein binding // chemokine activity // cytokine activity // interleukin-8 receptor binding // chemokine activity	---	---	chrNA:-1--1	TC04000408.hg.1	7.08347	6.97896	6.68887	8.25424	8.57976	8.7003	5.24156	5.6369	5.30299	6.29364	6.68906	6.46202	5.69328	6.05963	5.7142	6.63964	6.52143	6.53514
314	TC04000469.hg.1	PTPN13	NM_006264	RefSeq	Homo sapiens protein tyrosine phosphatase, non-receptor type 13 (APO-1/CD95 (Fas)-associated phosphatase) (PTPN13), transcript variant 2, mRNA.	FALSE	chr4	GO:0006470 // GO:0035335 // GO:0035335 // GO:0035335 // GO:0006470 // GO:0016311	protein dephosphorylation // peptidyl-tyrosine dephosphorylation // peptidyl-tyrosine dephosphorylation // peptidyl-tyrosine dephosphorylation // protein dephosphorylation // dephosphorylation	GO:0005634 // GO:0005737 // GO:0005856 // GO:0005886 // GO:0030027 // GO:0043005 // GO:0044297 // GO:0070062 // GO:0005634 // GO:0005737 // GO:0030027 // GO:0042995	nucleus // cytoplasm // cytoskeleton // plasma membrane // lamellipodium // neuron projection // cell body // extracellular vesicular exosome // nucleus // cytoplasm // lamellipodium // cell projection	GO:0004725 // GO:0005515 // GO:0004721 // GO:0004725 // GO:0004725 // GO:0016787 // GO:0016791	protein tyrosine phosphatase activity // protein binding // phosphoprotein phosphatase activity // protein tyrosine phosphatase activity // protein tyrosine phosphatase activity // hydrolase activity // phosphatase activity	GenMAPP	Apoptosis_KEGG	chrNA:-1--1	TC04000469.hg.1	8.9675	9.41212	9.14304	7.54253	7.13513	7.49875	6.61431	6.45276	6.6152	6.54908	6.55482	6.925	7.80554	7.69985	8.03175	7.81571	8.69314	8.92212
315	TC04000486.hg.1	HERC3	NM_014606	RefSeq	Homo sapiens HECT and RLD domain containing E3 ubiquitin protein ligase 3 (HERC3), transcript variant 1, mRNA.	FALSE	chr4	GO:0042787 // GO:0016567 // GO:0042787 // GO:0008152	protein ubiquitination involved in ubiquitin-dependent protein catabolic process // protein ubiquitination // protein ubiquitination involved in ubiquitin-dependent protein catabolic process // metabolic process	GO:0005634 // GO:0016023 // GO:0005634 // GO:0005737 // GO:0031410	nucleus // cytoplasmic membrane-bounded vesicle // nucleus // cytoplasm // cytoplasmic vesicle	GO:0004842 // GO:0016874 // GO:0004842 // GO:0004842	ubiquitin-protein transferase activity // ligase activity // ubiquitin-protein transferase activity // ubiquitin-protein transferase activity	---	---	chrNA:-1--1	TC04000486.hg.1	6.32689	6.55134	6.52362	7.36446	7.41042	7.38649	5.77856	5.83546	5.87066	5.69622	5.6696	5.75239	7.31065	7.25495	7.43745	7.38546	8.2619	8.07001
316	TC04000501.hg.1	PDLIM5	NM_001011513	RefSeq	Homo sapiens PDZ and LIM domain 5 (PDLIM5), transcript variant 2, mRNA.	FALSE	chr4	GO:0051963 // GO:0061001	regulation of synapse assembly // regulation of dendritic spine morphogenesis	GO:0005829 // GO:0014069 // GO:0015629 // GO:0016020 // GO:0030054 // GO:0043005 // GO:0045211 // GO:0005737 // GO:0005886 // GO:0014069 // GO:0016020 // GO:0045202 // GO:0005737	cytosol // postsynaptic density // actin cytoskeleton // membrane // cell junction // neuron projection // postsynaptic membrane // cytoplasm // plasma membrane // postsynaptic density // membrane // synapse // cytoplasm	GO:0003779 // GO:0005080 // GO:0008270 // GO:0042805 // GO:0046872	actin binding // protein kinase C binding // zinc ion binding // actinin binding // metal ion binding	---	---	chrNA:-1--1	TC04000501.hg.1	9.6219	9.40053	9.31208	9.55646	9.56704	9.47468	9.16373	9.1304	9.15218	8.12438	8.32905	8.32093	9.03854	9.10889	9.03316	9.11746	9.56391	9.38504
317	TC04000560.hg.1	RNU6-431P	ENST00000383874	ENSEMBL	ncrna:known chromosome:GRCh38:4:108652150:108652256:1 gene:ENSG00000206601 gene_biotype:snRNA transcript_biotype:snRNA	FALSE	chr4	---	---	---	---	---	---	---	---	chrNA:-1--1	TC04000560.hg.1	7.63314	7.52855	7.34832	8.45641	8.66603	8.64944	7.95387	7.93523	7.89621	7.43899	8.00264	7.31164	6.84694	6.24973	7.52586	6.71098	7.32743	7.58753
318	TC04000599.hg.1	SNHG8	NR_003584	RefSeq	Homo sapiens small nucleolar RNA host gene 8 (non-protein coding) (SNHG8), transcript variant 1, long non-coding RNA.	FALSE	chr4	---	---	---	---	---	---	---	---	chrNA:-1--1	TC04000599.hg.1	9.1292	9.45738	9.25459	10.168	10.1213	10.0393	9.70733	9.65713	8.60098	10.0622	9.75095	9.90375	11.1552	11.3059	11.0698	12.6429	12.1197	12.026
319	TC04000631.hg.1	SPATA5	NM_145207	RefSeq	Homo sapiens spermatogenesis associated 5 (SPATA5), mRNA.	FALSE	chr4	GO:0007275 // GO:0007283 // GO:0008152 // GO:0030154	multicellular organismal development // spermatogenesis // metabolic process // cell differentiation	GO:0005737 // GO:0005739 // GO:0005737	cytoplasm // mitochondrion // cytoplasm	GO:0005524 // GO:0017111 // GO:0000166	ATP binding // nucleoside-triphosphatase activity // nucleotide binding	---	---	chrNA:-1--1	TC04000631.hg.1	7.50197	7.50795	7.46172	8.17441	8.23162	8.21399	8.01109	8.10617	7.94816	7.4048	7.52374	8.04215	6.89137	7.13117	7.17033	6.47915	6.57613	6.52781
320	TC04000643.hg.1	HSPA4L	NM_014278	RefSeq	Homo sapiens heat shock 70kDa protein 4-like (HSPA4L), mRNA.	FALSE	chr4	GO:0006457 // GO:0006986 // GO:0006950 // GO:0006986	protein folding // response to unfolded protein // response to stress // response to unfolded protein	GO:0005634 // GO:0005737 // GO:0005829 // GO:0005634 // GO:0005737	nucleus // cytoplasm // cytosol // nucleus // cytoplasm	GO:0005524 // GO:0000166 // GO:0005524	ATP binding // nucleotide binding // ATP binding	---	---	chrNA:-1--1	TC04000643.hg.1	7.14324	7.43501	7.24302	7.65702	7.40524	7.99075	7.80688	7.68537	7.56219	6.62604	6.91565	7.09596	8.03578	7.57907	7.7135	6.17517	6.35011	6.53437
321	TC04000645.hg.1	PLK4	NM_001190799	RefSeq	Homo sapiens polo-like kinase 4 (PLK4), transcript variant 2, mRNA.	FALSE	chr4	GO:0000086 // GO:0000278 // GO:0006468 // GO:0007099 // GO:0018108 // GO:0046601 // GO:0060707 // GO:0098535 // GO:0006468 // GO:0016310 // GO:0060707	G2/M transition of mitotic cell cycle // mitotic cell cycle // protein phosphorylation // centriole replication // peptidyl-tyrosine phosphorylation // positive regulation of centriole replication // trophoblast giant cell differentiation // de novo centriole assembly // protein phosphorylation // phosphorylation // trophoblast giant cell differentiation	GO:0005730 // GO:0005813 // GO:0005814 // GO:0005829 // GO:0032154 // GO:0098536 // GO:0005634 // GO:0005730 // GO:0005737 // GO:0005814 // GO:0005856	nucleolus // centrosome // centriole // cytosol // cleavage furrow // deuterosome // nucleus // nucleolus // cytoplasm // centriole // cytoskeleton	GO:0004674 // GO:0004674 // GO:0004713 // GO:0005515 // GO:0005524 // GO:0042802 // GO:0000166 // GO:0004672 // GO:0004674 // GO:0004674 // GO:0016301 // GO:0016740 // GO:0016772	protein serine/threonine kinase activity // protein serine/threonine kinase activity // protein tyrosine kinase activity // protein binding // ATP binding // identical protein binding // nucleotide binding // protein kinase activity // protein serine/threonine kinase activity // protein serine/threonine kinase activity // kinase activity // transferase activity // transferase activity, transferri…	---	---	chrNA:-1--1	TC04000645.hg.1	7.77631	8.12555	7.79885	8.01118	8.12353	8.20934	8.04679	7.64837	7.64393	7.64864	7.87326	7.86005	8.57721	8.64926	8.60725	6.43044	6.93363	6.76547
322	TC04000710.hg.1	RTN3P1	ENST00000536295	ENSEMBL	havana:known chromosome:GRCh38:4:145375543:145376253:1 gene:ENSG00000251333 gene_biotype:processed_pseudogene transcript_biotype:processed_pseudogene	FALSE	chr4	---	---	---	---	---	---	---	---	chrNA:-1--1	TC04000710.hg.1	11.2413	11.3807	11.2498	10.6843	10.3171	11.0165	12.9149	13.5533	14.2404	13.3032	13.2099	13.6325	11.2695	11.1664	11.0439	9.75554	9.63762	9.77617
323	TC04000773.hg.1	MND1	NM_001253861	RefSeq	Homo sapiens meiotic nuclear divisions 1 homolog (S. cerevisiae) (MND1), transcript variant 2, mRNA.	FALSE	chr4	GO:0006310 // GO:0007126	DNA recombination // meiotic nuclear division	GO:0005634	nucleus	GO:0003677	DNA binding	---	---	chrNA:-1--1	TC04000773.hg.1	6.9523	7.16903	6.59486	6.75517	6.90187	6.91091	7.04431	7.18009	6.96314	7.57202	7.54849	7.76101	8.35196	8.15509	8.13423	6.39541	6.15526	6.33547
324	TC04000828.hg.1	MSMO1	NM_001017369	RefSeq	Homo sapiens methylsterol monooxygenase 1 (MSMO1), transcript variant 2, mRNA.	FALSE	chr4	GO:0006631 // GO:0006633 // GO:0006695 // GO:0008202 // GO:0044281 // GO:0055114 // GO:0006629 // GO:0006694 // GO:0008202 // GO:0016126	fatty acid metabolic process // fatty acid biosynthetic process // cholesterol biosynthetic process // steroid metabolic process // small molecule metabolic process // oxidation-reduction process // lipid metabolic process // steroid biosynthetic process // steroid metabolic process // sterol biosynthetic process	GO:0005783 // GO:0005789 // GO:0005886 // GO:0016021 // GO:0005783 // GO:0005789 // GO:0016020 // GO:0016021	endoplasmic reticulum // endoplasmic reticulum membrane // plasma membrane // integral component of membrane // endoplasmic reticulum // endoplasmic reticulum membrane // membrane // integral component of membrane	GO:0000254 // GO:0005506 // GO:0000254 // GO:0016491	C-4 methylsterol oxidase activity // iron ion binding // C-4 methylsterol oxidase activity // oxidoreductase activity	GenMAPP	Cholesterol_Biosynthesis	chrNA:-1--1	TC04000828.hg.1	11.1084	11.3024	11.2091	12.7425	12.6573	12.8022	12.8611	14.4072	14.4933	13.0692	12.8818	13.2631	10.9458	10.8885	11.1836	14.4233	15.0824	14.7265
325	TC04000836.hg.1	ANXA10	NM_007193	RefSeq	Homo sapiens annexin A10 (ANXA10), mRNA.	FALSE	chr4	---	---	GO:0005739	mitochondrion	GO:0005509 // GO:0005544 // GO:0005509	calcium ion binding // calcium-dependent phospholipid binding // calcium ion binding	---	---	chrNA:-1--1	TC04000836.hg.1	5.34104	4.89613	5.07833	4.43926	4.45864	4.50516	4.36341	4.66245	4.42458	4.33873	4.29607	4.53879	11.7789	11.8625	11.441	10.2336	10.3476	10.3032
326	TC04000856.hg.1	SAP30	NM_003864	RefSeq	Homo sapiens Sin3A-associated protein, 30kDa (SAP30), mRNA.	FALSE	chr4	GO:0000122 // GO:0006351 // GO:0006355 // GO:0035914 // GO:0006355	negative regulation of transcription from RNA polymerase II promoter // transcription, DNA-templated // regulation of transcription, DNA-templated // skeletal muscle cell differentiation // regulation of transcription, DNA-templated	GO:0000118 // GO:0005634	histone deacetylase complex // nucleus	GO:0003677 // GO:0003714 // GO:0005515 // GO:0046872	DNA binding // transcription corepressor activity // protein binding // metal ion binding	---	---	chrNA:-1--1	TC04000856.hg.1	7.58017	7.52857	7.70556	6.68059	6.89082	6.42218	8.89457	8.70411	8.03269	8.70684	8.19734	9.25046	7.83076	7.32658	7.34958	6.65529	5.55464	6.10926
327	TC04000874.hg.1	NEIL3	NM_018248	RefSeq	Homo sapiens nei endonuclease VIII-like 3 (E. coli) (NEIL3), mRNA.	FALSE	chr4	GO:0000737 // GO:0000737 // GO:0006284 // GO:0006289 // GO:0006281 // GO:0006284 // GO:0006974 // GO:0008152	DNA catabolic process, endonucleolytic // DNA catabolic process, endonucleolytic // base-excision repair // nucleotide-excision repair // DNA repair // base-excision repair // cellular response to DNA damage stimulus // metabolic process	GO:0005634 // GO:0005634	nucleus // nucleus	GO:0000405 // GO:0003684 // GO:0003690 // GO:0003697 // GO:0003906 // GO:0008270 // GO:0019104 // GO:0019104 // GO:0000405 // GO:0003676 // GO:0003677 // GO:0003690 // GO:0003824 // GO:0003906 // GO:0016787 // GO:0016798 // GO:0016799 // GO:0016829 // GO:0046872	bubble DNA binding // damaged DNA binding // double-stranded DNA binding // single-stranded DNA binding // DNA-(apurinic or apyrimidinic site) lyase activity // zinc ion binding // DNA N-glycosylase activity // DNA N-glycosylase activity // bubble DNA binding // nucleic acid binding // DNA binding // double-stranded DNA binding // catalytic activity // DNA-(apurinic or apyrimidinic site) lyase ac…	---	---	chrNA:-1--1	TC04000874.hg.1	7.56335	7.89839	7.42519	7.89625	8.01858	7.68453	9.12481	8.99033	9.1798	8.63307	9.17027	9.35253	7.82361	7.70403	7.99683	5.86017	5.7542	5.88482
328	TC04000932.hg.1	HSP90AA4P	ENST00000378770	ENSEMBL	havana:known chromosome:GRCh38:4:189473147:189475190:1 gene:ENSG00000205100 gene_biotype:transcribed_processed_pseudogene transcript_biotype:processed_transcript	FALSE	chr4	GO:0006457 // GO:0006950 // GO:0008150	protein folding // response to stress // biological_process	GO:0005737 // GO:0005575	cytoplasm // cellular_component	GO:0005524 // GO:0051082 // GO:0000166 // GO:0003674	ATP binding // unfolded protein binding // nucleotide binding // molecular_function	---	---	chrNA:-1--1	TC04000932.hg.1	5.90385	6.41472	5.90479	6.91106	6.58743	7.50498	6.96663	7.02386	7.31884	6.01924	6.76146	7.04608	8.49821	8.19081	8.81931	7.01417	7.23284	6.98997
329	TC04001002.hg.1	RP11-539L10.3	OTTHUMT00000368685	Havana transcript	cdna:all chromosome:VEGA56:4:6670725:6673830:-1 Gene:OTTHUMG00000162381	FALSE	chr4	---	---	---	---	---	---	---	---	chrNA:-1--1	TC04001002.hg.1	5.03545	5.21694	5.58072	4.70448	5.20378	5.12105	5.95059	6.10676	5.72319	6.99653	5.88995	7.58668	5.82921	4.90118	5.4535	7.36084	7.38234	7.21832
330	TC04001180.hg.1	OCIAD2	NM_001014446	RefSeq	Homo sapiens OCIA domain containing 2 (OCIAD2), transcript variant 1, mRNA.	FALSE	chr4	---	---	GO:0005743 // GO:0005768 // GO:0005739	mitochondrial inner membrane // endosome // mitochondrion	---	---	---	---	chrNA:-1--1	TC04001180.hg.1	13.4313	13.5824	13.2494	12.1747	11.9841	12.0146	9.45653	9.72988	9.4011	10.2313	10.2957	10.4753	11.5659	11.2392	11.4287	11.5342	11.5008	11.5897
331	TC04001188.hg.1	---	ENST00000408148	ENSEMBL	ncrna:novel chromosome:GRCh38:4:49595610:49595692:-1 gene:ENSG00000221075 gene_biotype:miRNA transcript_biotype:miRNA	FALSE	chr4	---	---	---	---	---	---	---	---	chrNA:-1--1	TC04001188.hg.1	11.703	11.9438	11.956	13.8981	13.4367	13.5788	12.2721	12.4006	13.7309	11.4024	10.7037	11.4241	14.722	15.1152	14.7598	15.8206	15.6324	14.8156
332	TC04001190.hg.1	---	ENST00000408407	ENSEMBL	ncrna:novel chromosome:GRCh38:4:49598423:49598505:-1 gene:ENSG00000221334 gene_biotype:miRNA transcript_biotype:miRNA	FALSE	chr4	---	---	---	---	---	---	---	---	chrNA:-1--1	TC04001190.hg.1	11.703	11.9438	11.956	13.8981	13.4367	13.5788	12.2721	12.4006	13.7309	11.4024	10.7037	11.4241	14.722	15.1152	14.7598	15.8206	15.6324	14.8156
333	TC04001192.hg.1	---	ENST00000411167	ENSEMBL	ncrna:novel chromosome:GRCh38:4:49599428:49599509:-1 gene:ENSG00000223099 gene_biotype:miRNA transcript_biotype:miRNA	FALSE	chr4	---	---	---	---	---	---	---	---	chrNA:-1--1	TC04001192.hg.1	7.2151	7.36921	7.27141	8.23208	8.07458	8.04514	8.38318	8.0435	8.99169	6.8987	6.85225	7.35399	8.78442	9.49355	9.52851	10.0892	10.5432	9.65297
334	TC04001216.hg.1	NMU	NM_006681	RefSeq	Homo sapiens neuromedin U (NMU), transcript variant 1, mRNA.	FALSE	chr4	GO:0001696 // GO:0006940 // GO:0007165 // GO:0007186 // GO:0007218 // GO:0007586 // GO:0009648 // GO:0019233 // GO:0042755 // GO:0045987 // GO:0046887 // GO:0050806 // GO:0006940	gastric acid secretion // regulation of smooth muscle contraction // signal transduction // G-protein coupled receptor signaling pathway // neuropeptide signaling pathway // digestion // photoperiodism // sensory perception of pain // eating behavior // positive regulation of smooth muscle contraction // positive regulation of hormone secretion // positive regulation of synaptic transmission // r…	GO:0005576 // GO:0043195 // GO:0005576	extracellular region // terminal bouton // extracellular region	GO:0005102 // GO:0042922	receptor binding // neuromedin U receptor binding	---	---	chrNA:-1--1	TC04001216.hg.1	9.84839	10.1824	9.53915	7.89909	7.29612	7.01013	6.72931	7.0768	7.0165	6.50269	6.18516	6.76446	6.31029	6.2102	6.32913	6.48196	5.94192	6.33139
335	TC04001227.hg.1	---	ENST00000459071	ENSEMBL	[retired]ncrna:snoRNA chromosome:GRCh37:4:57972409:57972511:-1 gene:ENSG00000238541 gene_biotype:snoRNA transcript_biotype:snoRNA	FALSE	chr4	---	---	---	---	---	---	---	---	chrNA:-1--1	TC04001227.hg.1	9.12975	9.16169	9.23547	7.96681	7.69286	7.46689	6.95031	6.77483	7.83788	7.11922	6.42237	6.88023	6.03583	5.96939	5.50846	5.81676	6.03503	5.99909
336	TC04001283.hg.1	CXCL5	NM_002994	RefSeq	Homo sapiens chemokine (C-X-C motif) ligand 5 (CXCL5), mRNA.	FALSE	chr4	GO:0006935 // GO:0006955 // GO:0007165 // GO:0007267 // GO:0008284 // GO:0060326 // GO:0060326	chemotaxis // immune response // signal transduction // cell-cell signaling // positive regulation of cell proliferation // cell chemotaxis // cell chemotaxis	GO:0005576 // GO:0005615 // GO:0005576	extracellular region // extracellular space // extracellular region	GO:0008009 // GO:0005125 // GO:0008009	chemokine activity // cytokine activity // chemokine activity	---	---	chrNA:-1--1	TC04001283.hg.1	5.76912	5.7589	5.84675	7.27697	6.81468	7.16237	4.94736	4.93287	4.99473	5.15603	5.34391	5.10478	4.84816	5.05458	4.58513	5.23974	4.8163	4.66288
337	TC04001286.hg.1	CXCL2	NM_002089	RefSeq	Homo sapiens chemokine (C-X-C motif) ligand 2 (CXCL2), mRNA.	FALSE	chr4	GO:0002237 // GO:0006935 // GO:0006954 // GO:0006955 // GO:0060326 // GO:0060326 // GO:0006935 // GO:0006954	response to molecule of bacterial origin // chemotaxis // inflammatory response // immune response // cell chemotaxis // cell chemotaxis // chemotaxis // inflammatory response	GO:0005576 // GO:0005615 // GO:0005576 // GO:0005615	extracellular region // extracellular space // extracellular region // extracellular space	GO:0005515 // GO:0008009 // GO:0005125 // GO:0008009	protein binding // chemokine activity // cytokine activity // chemokine activity	---	---	chrNA:-1--1	TC04001286.hg.1	7.10937	7.45352	7.30197	8.71573	8.68235	9.04623	6.30241	6.3865	6.43816	7.97063	7.13197	7.44339	5.79849	6.27764	5.67899	5.63345	5.91168	5.7874
338	TC04001343.hg.1	---	ENST00000362660	ENSEMBL	ncrna:novel chromosome:GRCh38:4:82944738:82944845:-1 gene:ENSG00000199530 gene_biotype:misc_RNA transcript_biotype:misc_RNA	FALSE	chr4	---	---	---	---	---	---	---	---	chrNA:-1--1	TC04001343.hg.1	5.09553	5.65805	5.56936	5.71419	6.35112	6.18614	6.8357	6.67517	6.62969	5.53639	5.73624	5.78611	5.30015	5.8823	5.84217	5.30837	4.83762	4.36221
339	TC04001419.hg.1	H2AFZ	NM_002106	RefSeq	Homo sapiens H2A histone family, member Z (H2AFZ), mRNA.	FALSE	chr4	GO:0006334 // GO:0045944 // GO:0071392	nucleosome assembly // positive regulation of transcription from RNA polymerase II promoter // cellular response to estradiol stimulus	GO:0000786 // GO:0001740 // GO:0005634 // GO:0005719 // GO:0005720 // GO:0005634 // GO:0005694	nucleosome // Barr body // nucleus // nuclear euchromatin // nuclear heterochromatin // nucleus // chromosome	GO:0000978 // GO:0000979 // GO:0000980 // GO:0005515 // GO:0031490 // GO:0031492 // GO:0046982 // GO:0003677	RNA polymerase II core promoter proximal region sequence-specific DNA binding // RNA polymerase II core promoter sequence-specific DNA binding // RNA polymerase II distal enhancer sequence-specific DNA binding // protein binding // chromatin DNA binding // nucleosomal DNA binding // protein heterodimerization activity // DNA binding	GenMAPP	Proteasome_Degradation	chrNA:-1--1	TC04001419.hg.1	11.3309	11.4786	10.7995	10.4765	10.5666	10.7024	10.2395	10.4038	9.81517	10.2416	10.8665	11.0198	10.9008	10.6735	11.1447	8.92069	9.62232	9.72656
340	TC04001436.hg.1	CENPE	NM_001813	RefSeq	Homo sapiens centromere protein E, 312kDa (CENPE), transcript variant 1, mRNA.	FALSE	chr4	GO:0000089 // GO:0000278 // GO:0007018 // GO:0007079 // GO:0007080 // GO:0007275 // GO:0007596 // GO:0008152 // GO:0008152 // GO:0019886 // GO:0045860 // GO:0051382 // GO:0007018 // GO:0007049 // GO:0007067 // GO:0051301	mitotic metaphase // mitotic cell cycle // microtubule-based movement // mitotic chromosome movement towards spindle pole // mitotic metaphase plate congression // multicellular organismal development // blood coagulation // metabolic process // metabolic process // antigen processing and presentation of exogenous peptide antigen via MHC class II // positive regulation of protein kinase activity …	GO:0000775 // GO:0000776 // GO:0000778 // GO:0000779 // GO:0000940 // GO:0005634 // GO:0005737 // GO:0005819 // GO:0005829 // GO:0005871 // GO:0005874 // GO:0015630 // GO:0000775 // GO:0000776 // GO:0000777 // GO:0000940 // GO:0005634 // GO:0005694 // GO:0005737 // GO:0005856 // GO:0005874 // GO:0016020	chromosome, centromeric region // kinetochore // condensed nuclear chromosome kinetochore // condensed chromosome, centromeric region // condensed chromosome outer kinetochore // nucleus // cytoplasm // spindle // cytosol // kinesin complex // microtubule // microtubule cytoskeleton // chromosome, centromeric region // kinetochore // condensed chromosome kinetochore // condensed chromosome outer …	GO:0003777 // GO:0005515 // GO:0005524 // GO:0008017 // GO:0043515 // GO:0000166 // GO:0003777	microtubule motor activity // protein binding // ATP binding // microtubule binding // kinetochore binding // nucleotide binding // microtubule motor activity	---	---	chrNA:-1--1	TC04001436.hg.1	8.45072	9.21029	9.01871	8.90313	8.75352	9.42667	8.83173	7.98688	7.62871	6.5117	7.42068	7.78266	9.05433	8.2231	8.75849	6.28131	6.18982	6.54999
341	TC04001466.hg.1	CFI	NM_000204	RefSeq	Homo sapiens complement factor I (CFI), mRNA.	FALSE	chr4	GO:0006508 // GO:0006898 // GO:0006958 // GO:0030449 // GO:0045087 // GO:0002376 // GO:0045087	proteolysis // receptor-mediated endocytosis // complement activation, classical pathway // regulation of complement activation // innate immune response // immune system process // innate immune response	GO:0005576 // GO:0005615 // GO:0016020 // GO:0070062 // GO:0005576 // GO:0005615	extracellular region // extracellular space // membrane // extracellular vesicular exosome // extracellular region // extracellular space	GO:0004252 // GO:0005044 // GO:0046872 // GO:0003824 // GO:0004252 // GO:0008233 // GO:0008236 // GO:0016787	serine-type endopeptidase activity // scavenger receptor activity // metal ion binding // catalytic activity // serine-type endopeptidase activity // peptidase activity // serine-type peptidase activity // hydrolase activity	---	---	chrNA:-1--1	TC04001466.hg.1	6.48142	6.43144	6.27622	5.05258	4.87138	4.61542	5.65056	6.4046	6.26635	5.59419	6.04251	6.5005	5.30561	5.15101	5.31833	5.62598	5.26591	5.05324
342	TC04001478.hg.1	ZGRF1	NM_018392	RefSeq	Homo sapiens zinc finger, GRF-type containing 1 (ZGRF1), mRNA.	FALSE	chr4	---	---	GO:0016021 // GO:0016020	integral component of membrane // membrane	GO:0008270	zinc ion binding	---	---	chrNA:-1--1	TC04001478.hg.1	6.41508	6.83087	6.54713	6.99551	6.97593	6.95714	6.50664	6.76326	6.77537	6.68393	6.80093	7.45055	7.07497	6.97151	7.18459	6.14787	5.90237	5.94489
343	TC04001496.hg.1	SEC24D	NM_014822	RefSeq	Homo sapiens SEC24 family member D (SEC24D), mRNA.	FALSE	chr4	GO:0002474 // GO:0006886 // GO:0006888 // GO:0006888 // GO:0018279 // GO:0019886 // GO:0043687 // GO:0044267 // GO:0044281 // GO:0048208 // GO:0061024 // GO:0006810 // GO:0006888 // GO:0015031 // GO:0016192	antigen processing and presentation of peptide antigen via MHC class I // intracellular protein transport // ER to Golgi vesicle-mediated transport // ER to Golgi vesicle-mediated transport // protein N-linked glycosylation via asparagine // antigen processing and presentation of exogenous peptide antigen via MHC class II // post-translational protein modification // cellular protein metabolic pr…	GO:0000139 // GO:0005789 // GO:0005829 // GO:0012507 // GO:0030127 // GO:0048471 // GO:0005737 // GO:0005783 // GO:0005789 // GO:0005794 // GO:0016020 // GO:0030127	Golgi membrane // endoplasmic reticulum membrane // cytosol // ER to Golgi transport vesicle membrane // COPII vesicle coat // perinuclear region of cytoplasm // cytoplasm // endoplasmic reticulum // endoplasmic reticulum membrane // Golgi apparatus // membrane // COPII vesicle coat	GO:0008270 // GO:0003674	zinc ion binding // molecular_function	---	---	chrNA:-1--1	TC04001496.hg.1	7.18538	7.40311	7.36207	8.75232	8.93017	9.10113	8.63857	8.65972	8.53711	8.25326	7.98937	8.38855	7.43372	7.54042	7.29109	8.26027	8.29414	8.47122
344	TC04001499.hg.1	C4orf3	NM_001001701	RefSeq	Homo sapiens chromosome 4 open reading frame 3 (C4orf3), transcript variant 2, mRNA.	FALSE	chr4	---	---	GO:0016021 // GO:0016020	integral component of membrane // membrane	---	---	---	---	chrNA:-1--1	TC04001499.hg.1	6.61505	6.31103	6.14452	6.39534	6.29749	6.24202	6.65885	6.68955	6.69538	6.78266	7.08737	7.05475	7.06867	6.93347	6.83643	8.07453	7.67965	8.25348
345	TC04001507.hg.1	MAD2L1	NM_002358	RefSeq	Homo sapiens MAD2 mitotic arrest deficient-like 1 (yeast) (MAD2L1), mRNA.	FALSE	chr4	GO:0000070 // GO:0000278 // GO:0007093 // GO:0007094 // GO:0031145 // GO:0042177 // GO:0043066 // GO:0051436 // GO:0051439 // GO:0060564 // GO:0090267 // GO:0007049 // GO:0007067 // GO:0007093 // GO:0007094 // GO:0043066 // GO:0045930 // GO:0051301 // GO:0090267	mitotic sister chromatid segregation // mitotic cell cycle // mitotic cell cycle checkpoint // mitotic spindle assembly checkpoint // anaphase-promoting complex-dependent proteasomal ubiquitin-dependent protein catabolic process // negative regulation of protein catabolic process // negative regulation of apoptotic process // negative regulation of ubiquitin-protein ligase activity involved in mi…	GO:0000776 // GO:0000777 // GO:0000922 // GO:0005634 // GO:0005643 // GO:0005829 // GO:0005829 // GO:0048471 // GO:0072686 // GO:0000775 // GO:0000776 // GO:0005634 // GO:0005694 // GO:0005737 // GO:0005856	kinetochore // condensed chromosome kinetochore // spindle pole // nucleus // nuclear pore // cytosol // cytosol // perinuclear region of cytoplasm // mitotic spindle // chromosome, centromeric region // kinetochore // nucleus // chromosome // cytoplasm // cytoskeleton	GO:0005515 // GO:0042802 // GO:0042803	protein binding // identical protein binding // protein homodimerization activity	GenMAPP	Cell_cycle_KEGG	chrNA:-1--1	TC04001507.hg.1	8.98691	9.51391	8.88041	8.00355	8.44338	8.25378	9.07741	9.26748	8.39098	8.9128	9.2552	9.29578	10.2263	9.73913	10.0933	7.72094	7.4379	7.97467
346	TC04001516.hg.1	CCNA2	NM_001237	RefSeq	Homo sapiens cyclin A2 (CCNA2), mRNA.	FALSE	chr4	GO:0000079 // GO:0000086 // GO:0000278 // GO:0007067 // GO:0007095 // GO:0007265 // GO:0010389 // GO:0031100 // GO:0032355 // GO:0033762 // GO:0045893 // GO:0048146 // GO:0007049 // GO:0051301 // GO:0051726	regulation of cyclin-dependent protein serine/threonine kinase activity // G2/M transition of mitotic cell cycle // mitotic cell cycle // mitotic nuclear division // mitotic G2 DNA damage checkpoint // Ras protein signal transduction // regulation of G2/M transition of mitotic cell cycle // organ regeneration // response to estradiol // response to glucagon // positive regulation of transcription…	GO:0001939 // GO:0001940 // GO:0005634 // GO:0005654 // GO:0005737 // GO:0005634 // GO:0005737	female pronucleus // male pronucleus // nucleus // nucleoplasm // cytoplasm // nucleus // cytoplasm	GO:0005515 // GO:0019901	protein binding // protein kinase binding	GenMAPP	Cell_cycle_KEGG	chrNA:-1--1	TC04001516.hg.1	10.4148	10.6053	10.8744	9.9818	10.0787	10.3838	12.7705	12.4965	12.3073	11.5079	11.5419	11.5814	14.2681	14.1375	14.1968	10.3826	10.4132	10.8909
347	TC04001559.hg.1	---	ENST00000385114	ENSEMBL	ncrna:novel chromosome:GRCh38:4:135371590:135371681:-1 gene:ENSG00000207849 gene_biotype:miRNA transcript_biotype:miRNA	FALSE	chr4	---	---	---	---	---	---	---	---	chrNA:-1--1	TC04001559.hg.1	7.42998	8.09052	7.64923	7.91302	7.46082	8.18207	10.1389	9.28336	9.34802	6.42554	6.71447	6.86157	7.93527	8.16692	7.83584	7.22914	6.78586	6.89283
348	TC04001565.hg.1	PCDH18	NM_019035	RefSeq	Homo sapiens protocadherin 18 (PCDH18), mRNA.	FALSE	chr4	GO:0007156 // GO:0007420 // GO:0007155 // GO:0007420	homophilic cell adhesion // brain development // cell adhesion // brain development	GO:0005886 // GO:0016021 // GO:0016020	plasma membrane // integral component of membrane // membrane	GO:0005509	calcium ion binding	---	---	chrNA:-1--1	TC04001565.hg.1	5.71354	6.08987	5.85979	4.71428	4.6679	4.47062	5.99788	6.17177	6.00008	4.95345	5.12988	5.44659	4.72262	4.85262	4.73375	5.54755	4.69276	4.73998
349	TC04001570.hg.1	SLC7A11	NM_014331	RefSeq	Homo sapiens solute carrier family 7 (anionic amino acid transporter light chain, xc- system), member 11 (SLC7A11), mRNA.	FALSE	chr4	GO:0003333 // GO:0006811 // GO:0006865 // GO:0006979 // GO:0007420 // GO:0007596 // GO:0009636 // GO:0015813 // GO:0035094 // GO:0050900 // GO:0055085 // GO:0070306 // GO:0070527 // GO:0006810 // GO:0006865	amino acid transmembrane transport // ion transport // amino acid transport // response to oxidative stress // brain development // blood coagulation // response to toxic substance // L-glutamate transport // response to nicotine // leukocyte migration // transmembrane transport // lens fiber cell differentiation // platelet aggregation // transport // amino acid transport	GO:0005791 // GO:0005856 // GO:0005886 // GO:0016021 // GO:0005886 // GO:0016020 // GO:0016021 // GO:0043231	rough endoplasmic reticulum // cytoskeleton // plasma membrane // integral component of membrane // plasma membrane // membrane // integral component of membrane // intracellular membrane-bounded organelle	GO:0005515 // GO:0015327 // GO:0015171	protein binding // cystine:glutamate antiporter activity // amino acid transmembrane transporter activity	---	---	chrNA:-1--1	TC04001570.hg.1	11.2216	11.413	11.0706	13.7632	13.7052	14.4109	14.9521	14.5213	15.1226	14.4714	14.9886	15.3635	15.7709	16.0009	16.2291	16.5416	17.4168	17.1702
350	TC04001682.hg.1	FAM198B	NM_001031700	RefSeq	Homo sapiens family with sequence similarity 198, member B (FAM198B), transcript variant 1, mRNA.	FALSE	chr4	---	---	GO:0000139 // GO:0005794 // GO:0016021 // GO:0005794 // GO:0016020	Golgi membrane // Golgi apparatus // integral component of membrane // Golgi apparatus // membrane	---	---	---	---	chrNA:-1--1	TC04001682.hg.1	5.07438	5.05451	5.05699	4.40753	4.43419	4.37934	4.6865	4.70705	4.73334	4.55803	4.44884	4.71943	5.26168	4.91835	5.1872	5.31769	4.82841	4.96001
351	TC04001731.hg.1	HSP90AA6P	ENST00000325407	ENSEMBL	havana:known chromosome:GRCh38:4:170581470:170604984:-1 gene:ENSG00000181359 gene_biotype:transcribed_processed_pseudogene transcript_biotype:processed_transcript	FALSE	chr4	---	---	---	---	---	---	---	---	chrNA:-1--1	TC04001731.hg.1	7.09167	7.56139	7.97405	8.13958	7.70177	8.49768	7.69233	7.48153	8.33118	7.55413	7.23632	7.69472	9.26244	8.96562	9.39983	8.02263	7.87095	7.9169
352	TC04001740.hg.1	RP11-798M19.3	OTTHUMT00000362359	Havana transcript	cdna:all chromosome:VEGA56:4:173322206:173329694:-1 Gene:OTTHUMG00000160797	FALSE	chr4	---	---	---	---	---	---	---	---	chrNA:-1--1	TC04001740.hg.1	6.48964	6.65801	5.69778	5.90513	5.56924	6.03968	7.85891	7.65254	7.29974	7.42646	8.31657	8.39172	7.30325	7.59192	7.87178	4.81312	5.48468	4.46336
353	TC04001741.hg.1	HMGB2	NM_001130688	RefSeq	Homo sapiens high mobility group box 2 (HMGB2), transcript variant 2, mRNA.	FALSE	chr4	GO:0001938 // GO:0006265 // GO:0006288 // GO:0006309 // GO:0006325 // GO:0006334 // GO:0006357 // GO:0006915 // GO:0006921 // GO:0007289 // GO:0008584 // GO:0032075 // GO:0033151 // GO:0043388 // GO:0045648 // GO:0045654 // GO:0045892 // GO:0045893 // GO:0045944 // GO:0048015 // GO:0048545 // GO:0050918 // GO:0051103 // GO:0060326 // GO:0071222 // GO:1902042 // GO:0007283 // GO:0043388 // GO:0045…	positive regulation of endothelial cell proliferation // DNA topological change // base-excision repair, DNA ligation // apoptotic DNA fragmentation // chromatin organization // nucleosome assembly // regulation of transcription from RNA polymerase II promoter // apoptotic process // cellular component disassembly involved in execution phase of apoptosis // spermatid nucleus differentiation // ma…	GO:0000793 // GO:0005615 // GO:0005634 // GO:0005654 // GO:0005737 // GO:0043234 // GO:0048471 // GO:0005634 // GO:0005694	condensed chromosome // extracellular space // nucleus // nucleoplasm // cytoplasm // protein complex // perinuclear region of cytoplasm // nucleus // chromosome	GO:0003677 // GO:0003684 // GO:0003690 // GO:0003697 // GO:0003700 // GO:0005515 // GO:0008301 // GO:0019904 // GO:0042056 // GO:0044212 // GO:0044822 // GO:0050786 // GO:0003677	DNA binding // damaged DNA binding // double-stranded DNA binding // single-stranded DNA binding // sequence-specific DNA binding transcription factor activity // protein binding // DNA binding, bending // protein domain specific binding // chemoattractant activity // transcription regulatory region DNA binding // poly(A) RNA binding // RAGE receptor binding // DNA binding	---	---	chrNA:-1--1	TC04001741.hg.1	7.76212	8.07521	8.01659	7.13096	7.28823	7.29754	8.43647	8.41909	8.46043	8.56083	8.41103	8.46321	8.25419	8.20477	8.04598	6.17935	6.34159	6.21575
354	TC04001808.hg.1	CENPU	NM_024629	RefSeq	Homo sapiens centromere protein U (CENPU), transcript variant 1, mRNA.	FALSE	chr4	GO:0000278 // GO:0006334 // GO:0006351 // GO:0006355 // GO:0016032 // GO:0034080	mitotic cell cycle // nucleosome assembly // transcription, DNA-templated // regulation of transcription, DNA-templated // viral process // centromere-specific nucleosome assembly	GO:0000777 // GO:0005634 // GO:0005654 // GO:0005815 // GO:0005829 // GO:0000775 // GO:0000776 // GO:0005634 // GO:0005694 // GO:0005737	condensed chromosome kinetochore // nucleus // nucleoplasm // microtubule organizing center // cytosol // chromosome, centromeric region // kinetochore // nucleus // chromosome // cytoplasm	---	---	---	---	chrNA:-1--1	TC04001808.hg.1	8.40976	8.59661	8.24274	8.27599	8.19505	8.15239	10.2069	9.92414	9.63494	10.1545	10.2518	10.4864	9.65205	9.29097	9.47846	6.36546	6.51449	6.31949
355	TC04001809.hg.1	ACSL1	NM_001995	RefSeq	Homo sapiens acyl-CoA synthetase long-chain family member 1 (ACSL1), transcript variant 1, mRNA.	FALSE	chr4	GO:0001676 // GO:0007584 // GO:0008610 // GO:0014070 // GO:0019432 // GO:0033211 // GO:0033559 // GO:0034201 // GO:0035338 // GO:0036109 // GO:0042178 // GO:0042493 // GO:0043651 // GO:0044255 // GO:0044281 // GO:0044539 // GO:0071902 // GO:0006629 // GO:0006631 // GO:0006641 // GO:0008152 // GO:0010033 // GO:0015908 // GO:0001676	long-chain fatty acid metabolic process // response to nutrient // lipid biosynthetic process // response to organic cyclic compound // triglyceride biosynthetic process // adiponectin-activated signaling pathway // unsaturated fatty acid metabolic process // response to oleic acid // long-chain fatty-acyl-CoA biosynthetic process // alpha-linolenic acid metabolic process // xenobiotic catabolic …	GO:0005739 // GO:0005741 // GO:0005778 // GO:0005789 // GO:0005886 // GO:0016021 // GO:0005739 // GO:0005741 // GO:0005777 // GO:0005783 // GO:0005789 // GO:0016020 // GO:0016020 // GO:0031090 // GO:0043231	mitochondrion // mitochondrial outer membrane // peroxisomal membrane // endoplasmic reticulum membrane // plasma membrane // integral component of membrane // mitochondrion // mitochondrial outer membrane // peroxisome // endoplasmic reticulum // endoplasmic reticulum membrane // membrane // membrane // organelle membrane // intracellular membrane-bounded organelle	GO:0004467 // GO:0004467 // GO:0005524 // GO:0000166 // GO:0003824 // GO:0004467 // GO:0016874	long-chain fatty acid-CoA ligase activity // long-chain fatty acid-CoA ligase activity // ATP binding // nucleotide binding // catalytic activity // long-chain fatty acid-CoA ligase activity // ligase activity	GenMAPP // GenMAPP // HumanCyc // HumanCyc // MetaCyc // MetaCyc // MetaCyc // MetaCyc // MetaCyc // MetaCyc // MetaCyc // MetaCyc // MetaCyc // MetaCyc // MetaCyc // MetaCyc // MetaCyc // MetaCyc // MetaCyc // MetaCyc // MetaCyc	Fatty_Acid_Degradation // Mitochondrial_fatty_acid_betaoxidation // PWY-5136 // FAO-PWY // PWY66-391 // PWY-5972 // PWY-5995 // PWY-7049 // PWY-6951 // PWY-7053 // PWY-5885 // PWY-5143 // PWY-6873 // PWY-6001 // PWY-6000 // PWY-7288 // PWY-5353 // PWY-7033 // PWY-6803 // PWY-5136 // FAO-PWY	chrNA:-1--1	TC04001809.hg.1	5.42294	4.98917	5.3033	5.04589	5.25586	5.01711	6.04453	5.97342	5.98613	6.589	6.80434	7.2332	6.61957	6.79709	6.97291	7.95413	9.24626	9.07485
356	TC04001925.hg.1	---	linc_luo_1858	NONCODE	accn=NULL class=lincRNA name=Human lincRNA ref=Scripture Reconstruction LincRNAs By Luo transcriptId=linc_luo_1858 cpcScore=-1.3218100 cnci=-0.2109306	FALSE	chr4	---	---	---	---	---	---	---	---	chrNA:-1--1	TC04001925.hg.1	3.62802	3.73432	3.86596	3.96703	3.70865	3.74746	3.80098	4.14841	3.75149	3.97749	3.72145	3.62546	4.48123	4.45913	4.62594	6.71595	5.73417	6.90065
357	TC04001947.hg.1	---	TCONS_00008015-XLOC_003480	Rinn lincRNA	linc-STIM2-4 chr4:+:26765708-26766256	FALSE	chr4	---	---	---	---	---	---	---	---	chrNA:-1--1	TC04001947.hg.1	6.97908	6.97639	7.08981	7.55092	8.39219	8.22689	7.45729	6.76014	7.67969	7.65219	8.0927	8.28622	7.36549	7.61667	7.66138	9.19752	9.51569	8.89421
358	TC04001997.hg.1	---	AK098597	NONCODE	accn=AK098597 class=mRNAlike lncRNA name=Human lncRNA ref=JounralRNA transcriptId=2421 cpcScore=-1.2198800 cnci=-0.3710022	FALSE	chr4	---	---	---	---	---	---	---	---	chrNA:-1--1	TC04001997.hg.1	7.36646	7.55543	7.30658	7.38802	8.08715	6.87372	4.78882	5.57502	6.04045	5.82597	6.47579	6.13844	5.83093	5.45712	5.34403	6.62252	6.90504	6.69096
359	TC04002003.hg.1	---	TCONS_00007523-XLOC_003526	Rinn lincRNA	linc-GUF1-3 chr4:+:43342891-43347617	FALSE	chr4	---	---	---	---	---	---	---	---	chrNA:-1--1	TC04002003.hg.1	8.65217	8.9533	8.10138	6.40913	6.22413	6.20849	4.42573	4.47527	4.41306	4.14548	4.40926	4.73907	5.58077	5.62754	6.02746	4.67045	5.03846	4.74235
360	TC04002094.hg.1	PTPN13	D21211	NONCODE	accn=D21211 class=mRNAlike lncRNA name=Human lncRNA ref=JounralRNA transcriptId=5112 cpcScore=16.5493000 cnci=-0.1473824	FALSE	chr4	GO:0006470 // GO:0035335 // GO:0035335 // GO:0035335 // GO:0006470 // GO:0016311	protein dephosphorylation // peptidyl-tyrosine dephosphorylation // peptidyl-tyrosine dephosphorylation // peptidyl-tyrosine dephosphorylation // protein dephosphorylation // dephosphorylation	GO:0005634 // GO:0005737 // GO:0005856 // GO:0005886 // GO:0030027 // GO:0043005 // GO:0044297 // GO:0070062 // GO:0005634 // GO:0005737 // GO:0030027 // GO:0042995	nucleus // cytoplasm // cytoskeleton // plasma membrane // lamellipodium // neuron projection // cell body // extracellular vesicular exosome // nucleus // cytoplasm // lamellipodium // cell projection	GO:0004725 // GO:0005515 // GO:0004721 // GO:0004725 // GO:0004725 // GO:0016787 // GO:0016791	protein tyrosine phosphatase activity // protein binding // phosphoprotein phosphatase activity // protein tyrosine phosphatase activity // protein tyrosine phosphatase activity // hydrolase activity // phosphatase activity	GenMAPP	Apoptosis_KEGG	chrNA:-1--1	TC04002094.hg.1	9.02224	9.50229	9.35115	7.50111	7.11962	7.56679	6.452	6.32017	6.65006	6.56786	6.56168	6.89744	7.83184	7.68997	7.98241	7.90215	8.84947	9.00211
361	TC04002345.hg.1	---	linc_luo_1205	NONCODE	accn=NULL class=lincRNA name=Human lincRNA ref=Scripture Reconstruction LincRNAs By Luo transcriptId=linc_luo_1205 cpcScore=-1.3114800 cnci=-0.1791926	FALSE	chr4	---	---	---	---	---	---	---	---	chrNA:-1--1	TC04002345.hg.1	6.3784	6.8289	7.10536	7.09331	7.49076	7.14133	7.7175	7.49973	7.56587	6.58793	6.57866	6.43299	4.26053	4.21631	4.41789	4.46363	3.7925	3.95509
362	TC04002393.hg.1	HSP90AA4P	NR_036692	NONCODE	accn=NR_036692 class=lncRNA name= ref=RefGeneNoncode transcriptId=NR_036692 cpcScore=8.6233200 cnci=-0.1497104	FALSE	chr4	GO:0006457 // GO:0006950 // GO:0008150	protein folding // response to stress // biological_process	GO:0005737 // GO:0005575	cytoplasm // cellular_component	GO:0005524 // GO:0051082 // GO:0000166 // GO:0003674	ATP binding // unfolded protein binding // nucleotide binding // molecular_function	---	---	chrNA:-1--1	TC04002393.hg.1	6.17622	6.60515	6.2557	7.37856	7.03925	7.74554	7.49047	7.59749	7.79777	6.4868	7.09175	7.56285	9.22341	8.66503	9.10243	7.86379	7.38057	7.66881
363	TC04002588.hg.1	CXCL5	AK026546	NONCODE	accn=AK026546 class=mRNAlike lncRNA name=Human lncRNA ref=JounralRNA transcriptId=5109 cpcScore=-1.3051500 cnci=-0.3672404	FALSE	chr4	GO:0006935 // GO:0006955 // GO:0007165 // GO:0007267 // GO:0008284 // GO:0060326 // GO:0060326	chemotaxis // immune response // signal transduction // cell-cell signaling // positive regulation of cell proliferation // cell chemotaxis // cell chemotaxis	GO:0005576 // GO:0005615 // GO:0005576	extracellular region // extracellular space // extracellular region	GO:0008009 // GO:0005125 // GO:0008009	chemokine activity // cytokine activity // chemokine activity	---	---	chrNA:-1--1	TC04002588.hg.1	9.87706	11.1376	10.4224	16.1822	15.9974	16.287	4.95696	5.03539	5.18007	6.29918	5.75923	6.37592	4.22292	5.23584	4.75627	4.84896	4.48492	4.64666
364	TC04002654.hg.1	CENPE	AY429526	NONCODE	accn=AY429526 class=mRNAlike lncRNA name=NULL ref=H-invitational v7.5 transcriptId=HIT000254614 cpcScore=1.0569100 cnci=-0.3333869	FALSE	chr4	GO:0000089 // GO:0000278 // GO:0007018 // GO:0007079 // GO:0007080 // GO:0007275 // GO:0007596 // GO:0008152 // GO:0008152 // GO:0019886 // GO:0045860 // GO:0051382 // GO:0007018 // GO:0007049 // GO:0007067 // GO:0051301	mitotic metaphase // mitotic cell cycle // microtubule-based movement // mitotic chromosome movement towards spindle pole // mitotic metaphase plate congression // multicellular organismal development // blood coagulation // metabolic process // metabolic process // antigen processing and presentation of exogenous peptide antigen via MHC class II // positive regulation of protein kinase activity …	GO:0000775 // GO:0000776 // GO:0000778 // GO:0000779 // GO:0000940 // GO:0005634 // GO:0005737 // GO:0005819 // GO:0005829 // GO:0005871 // GO:0005874 // GO:0015630 // GO:0000775 // GO:0000776 // GO:0000777 // GO:0000940 // GO:0005634 // GO:0005694 // GO:0005737 // GO:0005856 // GO:0005874 // GO:0016020	chromosome, centromeric region // kinetochore // condensed nuclear chromosome kinetochore // condensed chromosome, centromeric region // condensed chromosome outer kinetochore // nucleus // cytoplasm // spindle // cytosol // kinesin complex // microtubule // microtubule cytoskeleton // chromosome, centromeric region // kinetochore // condensed chromosome kinetochore // condensed chromosome outer …	GO:0003777 // GO:0005515 // GO:0005524 // GO:0008017 // GO:0043515 // GO:0000166 // GO:0003777	microtubule motor activity // protein binding // ATP binding // microtubule binding // kinetochore binding // nucleotide binding // microtubule motor activity	---	---	chrNA:-1--1	TC04002654.hg.1	10.1037	11.4534	11.3518	11.3803	10.7868	11.8416	11.7372	9.83219	9.48813	7.64116	8.7757	9.70002	10.9699	10.0803	10.058	7.42007	6.5525	7.08899
365	TC04002662.hg.1	---	Z48605	NONCODE	accn=Z48605 class=mRNAlike lncRNA name=NULL ref=H-invitational v7.5 transcriptId=HIT000327430 cpcScore=1.9612100 cnci=-0.2916952	FALSE	chr4	GO:0006418 // GO:0006796 // GO:0006796 // GO:0010467 // GO:0071344	tRNA aminoacylation for protein translation // phosphate-containing compound metabolic process // phosphate-containing compound metabolic process // gene expression // diphosphate metabolic process	GO:0005737 // GO:0005737 // GO:0005829 // GO:0070062	cytoplasm // cytoplasm // cytosol // extracellular vesicular exosome	GO:0000287 // GO:0004427 // GO:0004427 // GO:0004427 // GO:0016462 // GO:0016787 // GO:0046872	magnesium ion binding // inorganic diphosphatase activity // inorganic diphosphatase activity // inorganic diphosphatase activity // pyrophosphatase activity // hydrolase activity // metal ion binding	HumanCyc	P61-PWY	chrNA:-1--1	TC04002662.hg.1	7.63265	7.49336	7.78511	6.48609	6.46977	6.50517	7.93317	8.01961	7.67352	8.48372	7.49235	8.27347	8.07322	8.20429	7.8682	8.11338	7.65458	7.72903
366	TC04002948.hg.1	MGARP	NM_032623	RefSeq	Homo sapiens mitochondria-localized glutamic acid-rich protein (MGARP), mRNA.	FALSE	chr4	GO:0006626 // GO:0008089 // GO:0008090 // GO:0010822 // GO:0019896 // GO:0071383 // GO:0071456 // GO:0097211 // GO:0006626 // GO:0008089 // GO:0008090 // GO:0010822 // GO:0019896 // GO:0071383 // GO:0071456 // GO:0097211	protein targeting to mitochondrion // anterograde axon cargo transport // retrograde axon cargo transport // positive regulation of mitochondrion organization // axon transport of mitochondrion // cellular response to steroid hormone stimulus // cellular response to hypoxia // cellular response to gonadotropin-releasing hormone // protein targeting to mitochondrion // anterograde axon cargo trans…	GO:0005739 // GO:0031307 // GO:0005739 // GO:0005741 // GO:0016020 // GO:0016021 // GO:0031307	mitochondrion // integral component of mitochondrial outer membrane // mitochondrion // mitochondrial outer membrane // membrane // integral component of membrane // integral component of mitochondrial outer membrane	GO:0005515	protein binding	---	---	chrNA:-1--1	TC04002948.hg.1	5.68221	5.48882	5.70715	5.71443	5.73235	5.43107	12.1366	11.4015	11.686	9.35404	8.76057	8.72506	5.71254	5.88593	5.71927	6.25128	5.70078	5.71858
367	TC05000010.hg.1	TRIP13	NM_001166260	RefSeq	Homo sapiens thyroid hormone receptor interactor 13 (TRIP13), transcript variant 2, mRNA.	FALSE	chr5	GO:0001556 // GO:0006302 // GO:0006366 // GO:0007130 // GO:0007131 // GO:0007141 // GO:0007144 // GO:0007283 // GO:0007286 // GO:0048477 // GO:2001141 // GO:0006302 // GO:0007126 // GO:0007130 // GO:0007131 // GO:0007283 // GO:0030154 // GO:0048477	oocyte maturation // double-strand break repair // transcription from RNA polymerase II promoter // synaptonemal complex assembly // reciprocal meiotic recombination // male meiosis I // female meiosis I // spermatogenesis // spermatid development // oogenesis // regulation of RNA biosynthetic process // double-strand break repair // meiotic nuclear division // synaptonemal complex assembly // re…	GO:0001673 // GO:0005634	male germ cell nucleus // nucleus	GO:0003712 // GO:0005515 // GO:0005524 // GO:0017111 // GO:0042802 // GO:0000166 // GO:0005524	transcription cofactor activity // protein binding // ATP binding // nucleoside-triphosphatase activity // identical protein binding // nucleotide binding // ATP binding	---	---	chrNA:-1--1	TC05000010.hg.1	9.68175	9.76924	9.48327	10.1109	10.4284	10.5376	10.8589	10.5909	10.2865	10.3084	10.522	10.7428	10.0324	9.96391	10.1914	7.85477	8.08766	8.45578
368	TC05000078.hg.1	---	ENST00000506792	ENSEMBL	[retired] havana:sense_intronic chromosome:GRCh37:5:10594938:10596322:1 gene:ENSG00000250841 gene_biotype:sense_intronic transcript_biotype:sense_intronic	FALSE	chr5	---	---	---	---	---	---	---	---	chrNA:-1--1	TC05000078.hg.1	8.80499	8.52152	8.91153	8.2028	7.88702	7.81354	9.55349	9.22976	9.66718	7.32879	7.84518	7.65502	6.03416	6.97412	6.74109	6.81121	6.44598	6.54235
369	TC05000159.hg.1	IL7R	NM_002185	RefSeq	Homo sapiens interleukin 7 receptor (IL7R), transcript variant 1, mRNA.	FALSE	chr5	GO:0000018 // GO:0000902 // GO:0001915 // GO:0002377 // GO:0006955 // GO:0007165 // GO:0007166 // GO:0008361 // GO:0010628 // GO:0016049 // GO:0030217 // GO:0033089 // GO:0038111 // GO:0042100 // GO:0048535 // GO:0048872 // GO:0019221	regulation of DNA recombination // cell morphogenesis // negative regulation of T cell mediated cytotoxicity // immunoglobulin production // immune response // signal transduction // cell surface receptor signaling pathway // regulation of cell size // positive regulation of gene expression // cell growth // T cell differentiation // positive regulation of T cell differentiation in thymus // inte…	GO:0005576 // GO:0005886 // GO:0009897 // GO:0016021 // GO:0005886 // GO:0016020	extracellular region // plasma membrane // external side of plasma membrane // integral component of membrane // plasma membrane // membrane	GO:0003823 // GO:0004917 // GO:0005515 // GO:0004896	antigen binding // interleukin-7 receptor activity // protein binding // cytokine receptor activity	---	---	chrNA:-1--1	TC05000159.hg.1	9.31096	9.60297	9.27022	7.51669	7.02381	7.4647	9.30047	9.29532	8.69186	7.65391	7.68962	8.23712	5.92546	5.99117	6.01971	5.66572	5.39491	5.13545
370	TC05000161.hg.1	SKP2	NM_001243120	RefSeq	Homo sapiens S-phase kinase-associated protein 2, E3 ubiquitin protein ligase (SKP2), transcript variant 3, mRNA.	FALSE	chr5	GO:0000082 // GO:0000086 // GO:0000209 // GO:0000278 // GO:0008283 // GO:0031145 // GO:0033148 // GO:0048661 // GO:0051726 // GO:0071460 // GO:0000082 // GO:0006511 // GO:0016567 // GO:0016310	G1/S transition of mitotic cell cycle // G2/M transition of mitotic cell cycle // protein polyubiquitination // mitotic cell cycle // cell proliferation // anaphase-promoting complex-dependent proteasomal ubiquitin-dependent protein catabolic process // positive regulation of intracellular estrogen receptor signaling pathway // positive regulation of smooth muscle cell proliferation // regulation…	GO:0005634 // GO:0005654 // GO:0005730 // GO:0005737 // GO:0005829 // GO:0016235 // GO:0019005 // GO:0005634 // GO:0005737	nucleus // nucleoplasm // nucleolus // cytoplasm // cytosol // aggresome // SCF ubiquitin ligase complex // nucleus // cytoplasm	GO:0004842 // GO:0005515 // GO:0042802 // GO:0016301	ubiquitin-protein transferase activity // protein binding // identical protein binding // kinase activity	GenMAPP	Cell_cycle_KEGG	chrNA:-1--1	TC05000161.hg.1	10.4634	10.3889	10.39	9.68438	9.71167	10.1561	13.1021	12.8996	12.8721	12.3468	12.1324	12.5541	10.8096	10.6824	10.6718	9.12518	9.12583	9.75977
371	TC05000165.hg.1	SLC1A3	NM_001166695	RefSeq	Homo sapiens solute carrier family 1 (glial high affinity glutamate transporter), member 3 (SLC1A3), transcript variant GLAST1b, mRNA.	FALSE	chr5	GO:0001504 // GO:0006537 // GO:0006811 // GO:0007268 // GO:0007605 // GO:0009416 // GO:0009449 // GO:0009611 // GO:0021545 // GO:0031223 // GO:0042493 // GO:0046677 // GO:0048667 // GO:0050806 // GO:0050885 // GO:0051938 // GO:0055085 // GO:0070779 // GO:0006536 // GO:0006810 // GO:0006835 // GO:0015813 // GO:0051938	neurotransmitter uptake // glutamate biosynthetic process // ion transport // synaptic transmission // sensory perception of sound // response to light stimulus // gamma-aminobutyric acid biosynthetic process // response to wounding // cranial nerve development // auditory behavior // response to drug // response to antibiotic // cell morphogenesis involved in neuron differentiation // positive r…	GO:0005886 // GO:0009986 // GO:0016020 // GO:0016021 // GO:0042995 // GO:0043025 // GO:0043205 // GO:0005886 // GO:0016020	plasma membrane // cell surface // membrane // integral component of membrane // cell projection // neuronal cell body // fibril // plasma membrane // membrane	GO:0005313 // GO:0005314 // GO:0016595 // GO:0017153 // GO:0015293 // GO:0016597	L-glutamate transmembrane transporter activity // high-affinity glutamate transmembrane transporter activity // glutamate binding // sodium:dicarboxylate symporter activity // symporter activity // amino acid binding	---	---	chrNA:-1--1	TC05000165.hg.1	11.9908	12.7778	12.7006	9.05389	7.95882	8.17394	5.54721	5.46967	5.41872	5.39678	5.54139	5.76436	6.95979	6.98766	7.24418	6.30455	6.14555	6.38146
372	TC05000189.hg.1	C5orf51	NM_175921	RefSeq	Homo sapiens chromosome 5 open reading frame 51 (C5orf51), mRNA.	FALSE	chr5	GO:0006313	transposition, DNA-mediated	---	---	GO:0003676 // GO:0003677 // GO:0004803	nucleic acid binding // DNA binding // transposase activity	---	---	chrNA:-1--1	TC05000189.hg.1	8.46576	8.77371	9.00959	9.18775	9.23046	10.0335	10.5027	10.7769	10.6551	11.8334	11.7637	12.2677	8.88412	8.85996	8.87648	9.69292	9.98738	10.2729
373	TC05000284.hg.1	MAST4	NM_001164664	RefSeq	Homo sapiens microtubule associated serine/threonine kinase family member 4 (MAST4), transcript variant 3, mRNA.	FALSE	chr5	GO:0006468 // GO:0016310	protein phosphorylation // phosphorylation	GO:0005737	cytoplasm	GO:0000287 // GO:0004674 // GO:0005524 // GO:0000166 // GO:0004672 // GO:0016301 // GO:0016740 // GO:0016772 // GO:0046872	magnesium ion binding // protein serine/threonine kinase activity // ATP binding // nucleotide binding // protein kinase activity // kinase activity // transferase activity // transferase activity, transferring phosphorus-containing groups // metal ion binding	---	---	chrNA:-1--1	TC05000284.hg.1	7.20682	7.41329	7.33888	8.13356	8.16486	8.08505	5.93967	6.01283	5.99525	6.01902	6.11026	6.18667	7.29535	7.38042	7.41313	7.80825	7.78307	7.95676
374	TC05000298.hg.1	CCNB1	NM_031966	RefSeq	Homo sapiens cyclin B1 (CCNB1), mRNA.	FALSE	chr5	GO:0000079 // GO:0000082 // GO:0000086 // GO:0000278 // GO:0001556 // GO:0001701 // GO:0001933 // GO:0006461 // GO:0006468 // GO:0007077 // GO:0007080 // GO:0007283 // GO:0009612 // GO:0010629 // GO:0031145 // GO:0031442 // GO:0033129 // GO:0042246 // GO:0042493 // GO:0043148 // GO:0045931 // GO:0046680 // GO:0048565 // GO:0051437 // GO:0051439 // GO:0051726 // GO:0051987 // GO:0055015 // GO:0060…	regulation of cyclin-dependent protein serine/threonine kinase activity // G1/S transition of mitotic cell cycle // G2/M transition of mitotic cell cycle // mitotic cell cycle // oocyte maturation // in utero embryonic development // negative regulation of protein phosphorylation // protein complex assembly // protein phosphorylation // mitotic nuclear envelope disassembly // mitotic metaphase pl…	GO:0000922 // GO:0000942 // GO:0005634 // GO:0005654 // GO:0005737 // GO:0005813 // GO:0005829 // GO:0016020 // GO:0005634 // GO:0005737 // GO:0005815 // GO:0005856	spindle pole // condensed nuclear chromosome outer kinetochore // nucleus // nucleoplasm // cytoplasm // centrosome // cytosol // membrane // nucleus // cytoplasm // microtubule organizing center // cytoskeleton	GO:0005113 // GO:0005515 // GO:0016301 // GO:0019901 // GO:0019901	patched binding // protein binding // kinase activity // protein kinase binding // protein kinase binding	GenMAPP // GenMAPP	Cell_cycle_KEGG // G1_to_S_cell_cycle_Reactome	chrNA:-1--1	TC05000298.hg.1	13.0933	13.4573	12.9347	12.2596	12.1585	12.2222	14.4146	14.0649	13.5781	12.836	12.7368	13.164	13.7005	13.5674	13.6969	11.7303	11.5202	11.9264
375	TC05000336.hg.1	MAP1B	NM_005909	RefSeq	Homo sapiens microtubule-associated protein 1B (MAP1B), mRNA.	FALSE	chr5	GO:0001578 // GO:0008152 // GO:0009987 // GO:0016358 // GO:0032387 // GO:0045773 // GO:0047497 // GO:0048675 // GO:0061162 // GO:0000226 // GO:0007409	microtubule bundle formation // metabolic process // cellular process // dendrite development // negative regulation of intracellular transport // positive regulation of axon extension // mitochondrion transport along microtubule // axon extension // establishment of monopolar cell polarity // microtubule cytoskeleton organization // axonogenesis	GO:0005737 // GO:0005829 // GO:0005874 // GO:0005875 // GO:0005886 // GO:0030054 // GO:0043197 // GO:0045202 // GO:0005737 // GO:0005856 // GO:0042995	cytoplasm // cytosol // microtubule // microtubule associated complex // plasma membrane // cell junction // dendritic spine // synapse // cytoplasm // cytoskeleton // cell projection	GO:0005198 // GO:0005515 // GO:0008017 // GO:0016787	structural molecule activity // protein binding // microtubule binding // hydrolase activity	---	---	chrNA:-1--1	TC05000336.hg.1	7.98091	8.29821	8.43258	9.68513	9.71074	10.1107	11.8549	11.6425	11.7971	11.139	11.0573	10.96	6.26559	5.95489	6.36095	6.31902	5.90106	5.99007
376	TC05000363.hg.1	HMGCR	NM_000859	RefSeq	Homo sapiens 3-hydroxy-3-methylglutaryl-CoA reductase (HMGCR), transcript variant 1, mRNA.	FALSE	chr5	GO:0006695 // GO:0006743 // GO:0007568 // GO:0007584 // GO:0008299 // GO:0008542 // GO:0009790 // GO:0010664 // GO:0010666 // GO:0015936 // GO:0032874 // GO:0043407 // GO:0044255 // GO:0044281 // GO:0045445 // GO:0045471 // GO:0045908 // GO:0048643 // GO:0048661 // GO:0051262 // GO:0055114 // GO:0061045 // GO:0061179 // GO:0070374 // GO:0006629 // GO:0006694 // GO:0006695 // GO:0008202 // GO:0008…	cholesterol biosynthetic process // ubiquinone metabolic process // aging // response to nutrient // isoprenoid biosynthetic process // visual learning // embryo development // negative regulation of striated muscle cell apoptotic process // positive regulation of cardiac muscle cell apoptotic process // coenzyme A metabolic process // positive regulation of stress-activated MAPK cascade // negat…	GO:0005778 // GO:0005783 // GO:0005789 // GO:0016021 // GO:0005783 // GO:0005789 // GO:0016020 // GO:0043231	peroxisomal membrane // endoplasmic reticulum // endoplasmic reticulum membrane // integral component of membrane // endoplasmic reticulum // endoplasmic reticulum membrane // membrane // intracellular membrane-bounded organelle	GO:0004420 // GO:0005515 // GO:0042282 // GO:0042803 // GO:0050662 // GO:0070402 // GO:0016491 // GO:0016616 // GO:0042282 // GO:0050661 // GO:0050662	hydroxymethylglutaryl-CoA reductase (NADPH) activity // protein binding // hydroxymethylglutaryl-CoA reductase activity // protein homodimerization activity // coenzyme binding // NADPH binding // oxidoreductase activity // oxidoreductase activity, acting on the CH-OH group of donors, NAD or NADP as acceptor // hydroxymethylglutaryl-CoA reductase activity // NADP binding // coenzyme binding	GenMAPP // GenMAPP // HumanCyc // HumanCyc	Cholesterol_Biosynthesis // Statin_Pathway_PharmGKB // PWY-922 // PWY-5074	chrNA:-1--1	TC05000363.hg.1	8.94617	9.14297	8.77726	9.58886	9.65765	9.72397	9.04216	9.84075	9.83714	7.96287	8.55873	8.87174	7.33325	7.52554	7.79191	8.97345	10.1772	9.89053
377	TC05000389.hg.1	JMY	NM_152405	RefSeq	Homo sapiens junction mediating and regulatory protein, p53 cofactor (JMY), mRNA.	FALSE	chr5	GO:0006281 // GO:0006357 // GO:0007050 // GO:0034314 // GO:0043065 // GO:0051091 // GO:0070060 // GO:0070358 // GO:0072332 // GO:0006357 // GO:0006974 // GO:0007050 // GO:0034314 // GO:0043065 // GO:0051091 // GO:0070060 // GO:0070358	DNA repair // regulation of transcription from RNA polymerase II promoter // cell cycle arrest // Arp2/3 complex-mediated actin nucleation // positive regulation of apoptotic process // positive regulation of sequence-specific DNA binding transcription factor activity // 'de novo' actin filament nucleation // actin polymerization-dependent cell motility // intrinsic apoptotic signaling pathway by…	GO:0005634 // GO:0005737 // GO:0005856 // GO:0031252 // GO:0005634	nucleus // cytoplasm // cytoskeleton // cell leading edge // nucleus	GO:0003713 // GO:0003779 // GO:0005515 // GO:0003713	transcription coactivator activity // actin binding // protein binding // transcription coactivator activity	---	---	chrNA:-1--1	TC05000389.hg.1	6.98738	7.82926	7.40686	7.29569	6.96222	7.13167	6.62099	6.59112	6.60863	7.81616	8.07234	8.23714	6.15927	6.06285	6.2053	6.03661	6.83788	6.58294
378	TC05000453.hg.1	ANKRD32	NM_032290	RefSeq	Homo sapiens ankyrin repeat domain 32 (ANKRD32), mRNA.	FALSE	chr5	---	---	GO:0005634 // GO:0005813	nucleus // centrosome	---	---	---	---	chrNA:-1--1	TC05000453.hg.1	7.10698	7.2382	6.96838	6.55751	6.72106	6.65392	6.90054	7.08533	6.82961	6.76623	6.78439	7.02557	6.82732	6.82849	7.12291	5.63649	6.01644	5.76934
379	TC05000461.hg.1	RHOBTB3	NM_014899	RefSeq	Homo sapiens Rho-related BTB domain containing 3 (RHOBTB3), mRNA.	FALSE	chr5	GO:0006200 // GO:0007264 // GO:0042147 // GO:0006810 // GO:0008152	ATP catabolic process // small GTPase mediated signal transduction // retrograde transport, endosome to Golgi // transport // metabolic process	GO:0005794	Golgi apparatus	GO:0005515 // GO:0005524 // GO:0005525 // GO:0016887 // GO:0017137 // GO:0000166 // GO:0005524 // GO:0016787	protein binding // ATP binding // GTP binding // ATPase activity // Rab GTPase binding // nucleotide binding // ATP binding // hydrolase activity	---	---	chrNA:-1--1	TC05000461.hg.1	9.54909	9.4002	9.47047	8.18463	8.01488	8.41884	12.1813	11.8943	11.8438	12.0245	12.3426	12.5587	10.8126	10.868	10.8782	10.6885	11.1582	11.1058
380	TC05000497.hg.1	PAM	NM_000919	RefSeq	Homo sapiens peptidylglycine alpha-amidating monooxygenase (PAM), transcript variant 1, mRNA.	FALSE	chr5	GO:0001519 // GO:0001666 // GO:0001676 // GO:0006357 // GO:0007417 // GO:0007507 // GO:0007595 // GO:0009268 // GO:0009404 // GO:0018032 // GO:0022602 // GO:0032355 // GO:0032956 // GO:0042476 // GO:0042493 // GO:0046688 // GO:0050708 // GO:0051260 // GO:0051384 // GO:0055114 // GO:0060135 // GO:0060173 // GO:0001519 // GO:0006518 // GO:0008152 // GO:0019538 // GO:0007076	peptide amidation // response to hypoxia // long-chain fatty acid metabolic process // regulation of transcription from RNA polymerase II promoter // central nervous system development // heart development // lactation // response to pH // toxin metabolic process // protein amidation // ovulation cycle process // response to estradiol // regulation of actin cytoskeleton organization // odontogene…	GO:0005615 // GO:0005802 // GO:0005886 // GO:0009986 // GO:0016021 // GO:0030667 // GO:0043005 // GO:0043204 // GO:0048471 // GO:0070062 // GO:0005576 // GO:0016020 // GO:0016020 // GO:0030141 // GO:0043025 // GO:0000790 // GO:0000793	extracellular space // trans-Golgi network // plasma membrane // cell surface // integral component of membrane // secretory granule membrane // neuron projection // perikaryon // perinuclear region of cytoplasm // extracellular vesicular exosome // extracellular region // membrane // membrane // secretory granule // neuronal cell body // nuclear chromatin // condensed chromosome	GO:0004504 // GO:0004598 // GO:0005507 // GO:0005509 // GO:0005515 // GO:0008270 // GO:0019901 // GO:0031418 // GO:0003824 // GO:0004497 // GO:0004504 // GO:0004598 // GO:0008270 // GO:0016491 // GO:0016715 // GO:0016829 // GO:0046872 // GO:0003682 // GO:0004504	peptidylglycine monooxygenase activity // peptidylamidoglycolate lyase activity // copper ion binding // calcium ion binding // protein binding // zinc ion binding // protein kinase binding // L-ascorbic acid binding // catalytic activity // monooxygenase activity // peptidylglycine monooxygenase activity // peptidylamidoglycolate lyase activity // zinc ion binding // oxidoreductase activity // o…	---	---	chrNA:-1--1	TC05000497.hg.1	7.82003	8.30936	8.18991	8.10109	7.95604	7.95467	7.29641	7.55374	7.48158	7.37605	7.65023	7.77785	6.37488	6.41486	6.5794	7.06788	7.43446	7.59486
381	TC05000525.hg.1	EPB41L4A-AS1	NR_015370	RefSeq	Homo sapiens EPB41L4A antisense RNA 1 (EPB41L4A-AS1), long non-coding RNA.	FALSE	chr5	---	---	---	---	---	---	---	---	chrNA:-1--1	TC05000525.hg.1	7.33305	7.45949	7.23611	8.40347	8.76646	8.37806	6.30863	6.39	6.21161	8.0281	8.50729	8.43977	6.78172	6.69915	6.58767	8.16296	8.33181	8.43476
382	TC05000601.hg.1	GRAMD3	NM_001146319	RefSeq	Homo sapiens GRAM domain containing 3 (GRAMD3), transcript variant 1, mRNA.	FALSE	chr5	---	---	GO:0005881	cytoplasmic microtubule	---	---	---	---	chrNA:-1--1	TC05000601.hg.1	7.3573	7.6411	7.53582	7.5568	7.44645	7.45724	12.9658	13.1167	13.1904	11.3536	11.212	11.5259	6.8084	6.94889	7.00202	7.05425	6.79376	6.96983
383	TC05000604.hg.1	LMNB1	NM_001198557	RefSeq	Homo sapiens lamin B1 (LMNB1), transcript variant 2, mRNA.	FALSE	chr5	GO:0006915 // GO:0006921	apoptotic process // cellular component disassembly involved in execution phase of apoptosis	GO:0005635 // GO:0005637 // GO:0005638 // GO:0005654 // GO:0031965 // GO:0005634 // GO:0005635 // GO:0005638 // GO:0005654 // GO:0005882 // GO:0016020 // GO:0016020	nuclear envelope // nuclear inner membrane // lamin filament // nucleoplasm // nuclear membrane // nucleus // nuclear envelope // lamin filament // nucleoplasm // intermediate filament // membrane // membrane	GO:0005198 // GO:0043274 // GO:0005198	structural molecule activity // phospholipase binding // structural molecule activity	---	---	chrNA:-1--1	TC05000604.hg.1	7.60897	8.00872	8.09927	7.74949	7.81629	8.02147	8.22688	8.17469	8.27017	7.21764	7.59787	7.80637	8.28161	8.3199	8.39228	6.33108	6.4501	6.52412
384	TC05000665.hg.1	SEC24A	NM_001252231	RefSeq	Homo sapiens SEC24 family member A (SEC24A), transcript variant 2, mRNA.	FALSE	chr5	GO:0002474 // GO:0006886 // GO:0006888 // GO:0018279 // GO:0019886 // GO:0043687 // GO:0044267 // GO:0044281 // GO:0048208 // GO:0061024 // GO:0006810 // GO:0006888 // GO:0015031 // GO:0016192	antigen processing and presentation of peptide antigen via MHC class I // intracellular protein transport // ER to Golgi vesicle-mediated transport // protein N-linked glycosylation via asparagine // antigen processing and presentation of exogenous peptide antigen via MHC class II // post-translational protein modification // cellular protein metabolic process // small molecule metabolic process …	GO:0000139 // GO:0005789 // GO:0005829 // GO:0012507 // GO:0030127 // GO:0048471 // GO:0005737 // GO:0005783 // GO:0005789 // GO:0005794 // GO:0016020	Golgi membrane // endoplasmic reticulum membrane // cytosol // ER to Golgi transport vesicle membrane // COPII vesicle coat // perinuclear region of cytoplasm // cytoplasm // endoplasmic reticulum // endoplasmic reticulum membrane // Golgi apparatus // membrane	GO:0008270 // GO:0003674	zinc ion binding // molecular_function	---	---	chrNA:-1--1	TC05000665.hg.1	7.50925	7.58738	7.76649	8.72281	8.71438	8.95185	8.88747	9.01611	9.07022	9.17342	8.49462	8.79643	8.37863	8.26567	7.97468	8.80788	8.65191	8.78996
385	TC05000697.hg.1	KIF20A	NM_005733	RefSeq	Homo sapiens kinesin family member 20A (KIF20A), mRNA.	FALSE	chr5	GO:0000278 // GO:0000910 // GO:0001578 // GO:0007018 // GO:0008152 // GO:0015031 // GO:0016192 // GO:0000910 // GO:0006810	mitotic cell cycle // cytokinesis // microtubule bundle formation // microtubule-based movement // metabolic process // protein transport // vesicle-mediated transport // cytokinesis // transport	GO:0005654 // GO:0005794 // GO:0005819 // GO:0005871 // GO:0005874 // GO:0005737 // GO:0005794 // GO:0005819 // GO:0005856	nucleoplasm // Golgi apparatus // spindle // kinesin complex // microtubule // cytoplasm // Golgi apparatus // spindle // cytoskeleton	GO:0003777 // GO:0005215 // GO:0005524 // GO:0008017 // GO:0019901 // GO:0000166	microtubule motor activity // transporter activity // ATP binding // microtubule binding // protein kinase binding // nucleotide binding	---	---	chrNA:-1--1	TC05000697.hg.1	9.34607	10.0888	10.0324	8.45487	8.13962	8.69229	11.1395	10.6768	10.9473	8.86473	8.74245	8.7246	11.142	11.0099	11.1072	8.47805	8.24239	8.84659
386	TC05000701.hg.1	EGR1	NM_001964	RefSeq	Homo sapiens early growth response 1 (EGR1), mRNA.	FALSE	chr5	GO:0000122 // GO:0001975 // GO:0006366 // GO:0007611 // GO:0007623 // GO:0009749 // GO:0019221 // GO:0030217 // GO:0030509 // GO:0031667 // GO:0032869 // GO:0033233 // GO:0034465 // GO:0035690 // GO:0035914 // GO:0042220 // GO:0043066 // GO:0043525 // GO:0045471 // GO:0045893 // GO:0045944 // GO:0045944 // GO:0048169 // GO:0048709 // GO:0051602 // GO:0060291 // GO:0060337 // GO:0070498 // GO:0071…	negative regulation of transcription from RNA polymerase II promoter // response to amphetamine // transcription from RNA polymerase II promoter // learning or memory // circadian rhythm // response to glucose // cytokine-mediated signaling pathway // T cell differentiation // BMP signaling pathway // response to nutrient levels // cellular response to insulin stimulus // regulation of protein su…	GO:0005634 // GO:0005634 // GO:0005654 // GO:0005730 // GO:0005737 // GO:0005737 // GO:0005634 // GO:0005737	nucleus // nucleus // nucleoplasm // nucleolus // cytoplasm // cytoplasm // nucleus // cytoplasm	GO:0000976 // GO:0000979 // GO:0001077 // GO:0003677 // GO:0003690 // GO:0003700 // GO:0005515 // GO:0008134 // GO:0035035 // GO:0043565 // GO:0046872 // GO:0000977 // GO:0000982 // GO:0003676 // GO:0003677 // GO:0003700 // GO:0043565 // GO:0044212	transcription regulatory region sequence-specific DNA binding // RNA polymerase II core promoter sequence-specific DNA binding // RNA polymerase II core promoter proximal region sequence-specific DNA binding transcription factor activity involved in positive regulation of transcription // DNA binding // double-stranded DNA binding // sequence-specific DNA binding transcription factor activity // …	GenMAPP	Ovarian_Infertility_Genes	chrNA:-1--1	TC05000701.hg.1	6.76619	6.01136	6.95929	6.1708	6.1675	5.98152	5.25347	5.36763	5.37758	4.80815	5.30092	5.21435	5.15966	5.35086	5.30658	6.40888	6.17892	6.46885
387	TC05000779.hg.1	LOC101926941	ENST00000510311	ENSEMBL	havana:known chromosome:GRCh38:5:142325293:142464054:1 gene:ENSG00000231185 gene_biotype:antisense transcript_biotype:antisense	FALSE	chr5	---	---	---	---	---	---	---	---	chrNA:-1--1	TC05000779.hg.1	4.67561	4.88135	4.83504	5.65211	5.64844	5.67735	4.56139	4.89819	4.85297	4.66964	4.84378	5.05674	4.73371	4.6716	4.49283	4.96189	4.60123	4.48824
388	TC05000830.hg.1	TCOF1	NM_000356	RefSeq	Homo sapiens Treacher Collins-Franceschetti syndrome 1 (TCOF1), transcript variant 2, mRNA.	FALSE	chr5	GO:0001501 // GO:0006810 // GO:0042790	skeletal system development // transport // transcription of nuclear large rRNA transcript from RNA polymerase I promoter	GO:0005634 // GO:0005730 // GO:0005737 // GO:0005634 // GO:0005730 // GO:0005730	nucleus // nucleolus // cytoplasm // nucleus // nucleolus // nucleolus	GO:0005215 // GO:0005515 // GO:0044822	transporter activity // protein binding // poly(A) RNA binding	---	---	chrNA:-1--1	TC05000830.hg.1	7.90545	8.51296	8.47776	8.48903	8.36474	8.71076	9.00278	8.6081	8.74023	8.48212	8.27007	8.64779	9.45922	9.50885	9.48963	7.8615	8.0637	8.10424
389	TC05000907.hg.1	HMMR	NM_001142556	RefSeq	Homo sapiens hyaluronan-mediated motility receptor (RHAMM) (HMMR), transcript variant 1, mRNA.	FALSE	chr5	GO:0005975 // GO:0030203 // GO:0030212 // GO:0030214 // GO:0044281	carbohydrate metabolic process // glycosaminoglycan metabolic process // hyaluronan metabolic process // hyaluronan catabolic process // small molecule metabolic process	GO:0005737 // GO:0005886 // GO:0009986 // GO:0016020	cytoplasm // plasma membrane // cell surface // membrane	GO:0005540	hyaluronic acid binding	---	---	chrNA:-1--1	TC05000907.hg.1	9.15538	9.60059	9.47673	8.54762	8.38308	8.77337	9.15697	8.88139	8.77665	7.89862	8.01264	8.30749	9.26491	9.36466	9.33113	7.93254	7.94659	8.03974
390	TC05000908.hg.1	MAT2B	NM_013283	RefSeq	Homo sapiens methionine adenosyltransferase II, beta (MAT2B), transcript variant 1, mRNA.	FALSE	chr5	GO:0000096 // GO:0006556 // GO:0006556 // GO:0006730 // GO:0006805 // GO:0032259 // GO:0034641 // GO:0044281 // GO:0045226 // GO:0050790 // GO:0055114 // GO:0044237	sulfur amino acid metabolic process // S-adenosylmethionine biosynthetic process // S-adenosylmethionine biosynthetic process // one-carbon metabolic process // xenobiotic metabolic process // methylation // cellular nitrogen compound metabolic process // small molecule metabolic process // extracellular polysaccharide biosynthetic process // regulation of catalytic activity // oxidation-reductio…	GO:0005622 // GO:0005634 // GO:0005739 // GO:0005829 // GO:0048269	intracellular // nucleus // mitochondrion // cytosol // methionine adenosyltransferase complex	GO:0008831 // GO:0019899 // GO:0048270 // GO:0016740 // GO:0003824 // GO:0050662	dTDP-4-dehydrorhamnose reductase activity // enzyme binding // methionine adenosyltransferase regulator activity // transferase activity // catalytic activity // coenzyme binding	HumanCyc // HumanCyc // HumanCyc	SAM-PWY // PWY-5041 // METHIONINE-DEG1-PWY	chrNA:-1--1	TC05000908.hg.1	8.09387	8.21677	8.12857	7.12631	7.04489	6.98785	7.49377	7.52214	7.40101	7.43287	8.28111	8.25306	7.2324	7.29555	7.32898	7.29171	7.51121	7.51553
391	TC05000914.hg.1	TENM2	NM_001122679	RefSeq	Homo sapiens teneurin transmembrane protein 2 (TENM2), mRNA.	FALSE	chr5	GO:0000122 // GO:0006351 // GO:0007157 // GO:0007165 // GO:0007411 // GO:0016337 // GO:0035584 // GO:0051491 // GO:0006355 // GO:0007155	negative regulation of transcription from RNA polymerase II promoter // transcription, DNA-templated // heterophilic cell-cell adhesion // signal transduction // axon guidance // single organismal cell-cell adhesion // calcium-mediated signaling using intracellular calcium source // positive regulation of filopodium assembly // regulation of transcription, DNA-templated // cell adhesion	GO:0005634 // GO:0005783 // GO:0005794 // GO:0005886 // GO:0005886 // GO:0005887 // GO:0005911 // GO:0016605 // GO:0030054 // GO:0030175 // GO:0030425 // GO:0030426 // GO:0043005 // GO:0043197 // GO:0045202 // GO:0045211 // GO:0005634 // GO:0005783 // GO:0005794 // GO:0005886 // GO:0016020 // GO:0016021 // GO:0016605 // GO:0030054 // GO:0030175 // GO:0030426 // GO:0042995 // GO:0043005 // GO:0043…	nucleus // endoplasmic reticulum // Golgi apparatus // plasma membrane // plasma membrane // integral component of plasma membrane // cell-cell junction // PML body // cell junction // filopodium // dendrite // growth cone // neuron projection // dendritic spine // synapse // postsynaptic membrane // nucleus // endoplasmic reticulum // Golgi apparatus // plasma membrane // membrane // integral co…	GO:0005102 // GO:0005102 // GO:0005515 // GO:0042803 // GO:0046982 // GO:0050839	receptor binding // receptor binding // protein binding // protein homodimerization activity // protein heterodimerization activity // cell adhesion molecule binding	---	---	chrNA:-1--1	TC05000914.hg.1	7.08261	7.52627	7.18774	5.35459	5.10015	5.19122	5.03038	4.8932	4.904	4.66038	4.51419	4.6449	4.7682	4.71111	4.83474	5.01326	4.602	4.55813
392	TC05000928.hg.1	SPDL1	NM_017785	RefSeq	Homo sapiens spindle apparatus coiled-coil protein 1 (SPDL1), mRNA.	FALSE	chr5	GO:0000132 // GO:0000278 // GO:0007080 // GO:0031577 // GO:0034501 // GO:0007049 // GO:0007067 // GO:0034501 // GO:0051301	establishment of mitotic spindle orientation // mitotic cell cycle // mitotic metaphase plate congression // spindle checkpoint // protein localization to kinetochore // cell cycle // mitotic nuclear division // protein localization to kinetochore // cell division	GO:0000922 // GO:0000940 // GO:0005634 // GO:0005815 // GO:0005829 // GO:0000775 // GO:0000776 // GO:0000777 // GO:0000922 // GO:0000940 // GO:0005634 // GO:0005694 // GO:0005737 // GO:0005856	spindle pole // condensed chromosome outer kinetochore // nucleus // microtubule organizing center // cytosol // chromosome, centromeric region // kinetochore // condensed chromosome kinetochore // spindle pole // condensed chromosome outer kinetochore // nucleus // chromosome // cytoplasm // cytoskeleton	GO:0005515 // GO:0019899 // GO:0043515 // GO:0043515	protein binding // enzyme binding // kinetochore binding // kinetochore binding	---	---	chrNA:-1--1	TC05000928.hg.1	9.2406	9.73811	9.83425	10.1202	10.1366	10.3371	9.22633	8.87246	8.98422	8.15587	8.38402	8.83387	8.41429	8.55163	8.49694	6.65132	7.21024	7.32583
393	TC05000961.hg.1	CTB-164N12.1	OTTHUMT00000372716	Havana transcript	cdna:all chromosome:VEGA56:5:173469682:173484584:1 Gene:OTTHUMG00000163325	FALSE	chr5	---	---	---	---	---	---	---	---	chrNA:-1--1	TC05000961.hg.1	5.36051	5.23063	5.37003	6.5227	6.76252	6.54142	5.19733	5.33575	5.17648	5.14949	5.5853	5.35553	5.09289	4.9417	4.90415	5.44419	4.90085	5.05919
394	TC05000967.hg.1	CPEB4	NM_030627	RefSeq	Homo sapiens cytoplasmic polyadenylation element binding protein 4 (CPEB4), mRNA.	FALSE	chr5	GO:0002931 // GO:0035235 // GO:0036294 // GO:0042149 // GO:0043524 // GO:0071230	response to ischemia // ionotropic glutamate receptor signaling pathway // cellular response to decreased oxygen levels // cellular response to glucose starvation // negative regulation of neuron apoptotic process // cellular response to amino acid stimulus	GO:0005634 // GO:0005634 // GO:0005737 // GO:0005737 // GO:0005783 // GO:0014069 // GO:0030425 // GO:0045202	nucleus // nucleus // cytoplasm // cytoplasm // endoplasmic reticulum // postsynaptic density // dendrite // synapse	GO:0000166 // GO:0005515 // GO:0044822 // GO:0003676 // GO:0003723	nucleotide binding // protein binding // poly(A) RNA binding // nucleic acid binding // RNA binding	---	---	chrNA:-1--1	TC05000967.hg.1	6.73985	6.69858	6.87716	7.28415	7.21707	7.44042	6.79834	7.1771	7.07287	8.67895	8.89286	9.30187	6.19407	6.33639	5.97208	6.84619	7.34821	7.20467
395	TC05001137.hg.1	MED10	NM_032286	RefSeq	Homo sapiens mediator complex subunit 10 (MED10), mRNA.	FALSE	chr5	GO:0006367 // GO:0010467 // GO:0019827 // GO:0045944 // GO:0006351 // GO:0006355 // GO:0006357	transcription initiation from RNA polymerase II promoter // gene expression // stem cell maintenance // positive regulation of transcription from RNA polymerase II promoter // transcription, DNA-templated // regulation of transcription, DNA-templated // regulation of transcription from RNA polymerase II promoter	GO:0005654 // GO:0016592 // GO:0005634	nucleoplasm // mediator complex // nucleus	GO:0001104	RNA polymerase II transcription cofactor activity	---	---	chrNA:-1--1	TC05001137.hg.1	9.97099	10.6085	9.84077	11.1447	11.3124	11.4162	11.1662	11.061	10.961	11.5805	11.8868	12.522	9.41423	9.2055	9.6459	9.94788	10.6612	10.7484
396	TC05001224.hg.1	---	uc021xxa.1	UCSC Genes	Rfam model RF00998 hit found at contig region AC008768.8/25577-25677	FALSE	chr5	---	---	---	---	---	---	---	---	chrNA:-1--1	TC05001224.hg.1	8.42319	8.39001	8.68712	9.42347	9.50544	9.47204	8.5531	9.01903	9.49176	7.56602	8.16073	8.87542	9.29162	9.1535	9.05149	9.01779	8.90676	8.68152
397	TC05001239.hg.1	CTD-2066L21.2	OTTHUMT00000366716	Havana transcript	cdna:all chromosome:VEGA56:5:33011322:33017607:-1 Gene:OTTHUMG00000162005	FALSE	chr5	---	---	---	---	---	---	---	---	chrNA:-1--1	TC05001239.hg.1	6.94298	6.71924	6.88517	8.71955	8.53105	8.4184	4.60765	5.07172	4.63138	5.5962	4.95522	5.50495	5.26246	4.80719	5.03132	5.77214	4.22483	4.94657
398	TC05001295.hg.1	FYB	NM_001243093	RefSeq	Homo sapiens FYN binding protein (FYB), transcript variant 3, mRNA.	FALSE	chr5	GO:0006468 // GO:0006607 // GO:0006955 // GO:0007165 // GO:0035556 // GO:0050852 // GO:0008150	protein phosphorylation // NLS-bearing protein import into nucleus // immune response // signal transduction // intracellular signal transduction // T cell receptor signaling pathway // biological_process	GO:0005634 // GO:0005829 // GO:0015629 // GO:0005634 // GO:0005737	nucleus // cytosol // actin cytoskeleton // nucleus // cytoplasm	GO:0005102 // GO:0005515 // GO:0032403	receptor binding // protein binding // protein complex binding	---	---	chrNA:-1--1	TC05001295.hg.1	7.00953	7.40698	7.38206	6.407	6.19563	6.65019	5.02778	4.84046	4.85429	5.08128	4.80053	4.7397	9.46584	9.38861	9.2925	10.6091	10.9467	10.8967
399	TC05001316.hg.1	HMGCS1	NM_001098272	RefSeq	Homo sapiens 3-hydroxy-3-methylglutaryl-CoA synthase 1 (soluble) (HMGCS1), transcript variant 1, mRNA.	FALSE	chr5	GO:0001101 // GO:0001889 // GO:0006629 // GO:0006695 // GO:0007420 // GO:0008299 // GO:0008584 // GO:0009645 // GO:0014074 // GO:0033197 // GO:0042493 // GO:0044255 // GO:0044281 // GO:0046690 // GO:0055094 // GO:0071372 // GO:0071397 // GO:0006629 // GO:0006694 // GO:0006695 // GO:0008152 // GO:0008202 // GO:0008203 // GO:0009725 // GO:0010243 // GO:0014070 // GO:0016126 // GO:0034698 // GO:0070…	response to acid // liver development // lipid metabolic process // cholesterol biosynthetic process // brain development // isoprenoid biosynthetic process // male gonad development // response to low light intensity stimulus // response to purine-containing compound // response to vitamin E // response to drug // cellular lipid metabolic process // small molecule metabolic process // response t…	GO:0005634 // GO:0005730 // GO:0005737 // GO:0005829 // GO:0005886 // GO:0005737 // GO:0005737 // GO:0005829	nucleus // nucleolus // cytoplasm // cytosol // plasma membrane // cytoplasm // cytoplasm // cytosol	GO:0004421 // GO:0008144 // GO:0016853 // GO:0042803 // GO:0043177 // GO:0003824 // GO:0004421 // GO:0016740	hydroxymethylglutaryl-CoA synthase activity // drug binding // isomerase activity // protein homodimerization activity // organic acid binding // catalytic activity // hydroxymethylglutaryl-CoA synthase activity // transferase activity	GenMAPP	Cholesterol_Biosynthesis	chrNA:-1--1	TC05001316.hg.1	7.03715	7.22457	7.21592	9.21991	9.09076	9.29016	10.5306	11.8001	11.9047	9.2565	9.35555	9.84144	6.77142	6.77326	6.89576	9.89747	10.7409	10.3732
400	TC05001319.hg.1	C5orf34	NM_198566	RefSeq	Homo sapiens chromosome 5 open reading frame 34 (C5orf34), mRNA.	FALSE	chr5	---	---	---	---	---	---	---	---	chrNA:-1--1	TC05001319.hg.1	7.56714	7.89187	7.49432	7.82845	7.64293	7.82205	7.92231	8.17414	8.07715	7.6239	8.00945	8.38607	7.02737	7.12455	7.52274	5.47045	5.9396	6.08742
401	TC05001352.hg.1	ESM1	NM_001135604	RefSeq	Homo sapiens endothelial cell-specific molecule 1 (ESM1), transcript variant 2, mRNA.	FALSE	chr5	GO:0001525 // GO:0001558 // GO:0002040 // GO:0008284 // GO:1902204 // GO:0001525	angiogenesis // regulation of cell growth // sprouting angiogenesis // positive regulation of cell proliferation // positive regulation of hepatocyte growth factor receptor signaling pathway // angiogenesis	GO:0005576	extracellular region	GO:0005171 // GO:0005178 // GO:0005520	hepatocyte growth factor receptor binding // integrin binding // insulin-like growth factor binding	---	---	chrNA:-1--1	TC05001352.hg.1	4.96874	5.32005	4.7767	10.7834	10.3833	10.8104	4.45921	4.59009	4.23564	4.42023	4.76539	4.33902	4.80333	4.5829	4.61424	4.88862	4.63679	4.4043
402	TC05001363.hg.1	PPAP2A	NM_003711	RefSeq	Homo sapiens phosphatidic acid phosphatase type 2A (PPAP2A), transcript variant 1, mRNA.	FALSE	chr5	GO:0006470 // GO:0006629 // GO:0006665 // GO:0007205 // GO:0008285 // GO:0008354 // GO:0019216 // GO:0030148 // GO:0030518 // GO:0030521 // GO:0044281 // GO:0046839 // GO:0006629	protein dephosphorylation // lipid metabolic process // sphingolipid metabolic process // protein kinase C-activating G-protein coupled receptor signaling pathway // negative regulation of cell proliferation // germ cell migration // regulation of lipid metabolic process // sphingolipid biosynthetic process // intracellular steroid hormone receptor signaling pathway // androgen receptor signaling…	GO:0005886 // GO:0005887 // GO:0016020 // GO:0070062 // GO:0005886 // GO:0016020 // GO:0016021	plasma membrane // integral component of plasma membrane // membrane // extracellular vesicular exosome // plasma membrane // membrane // integral component of membrane	GO:0008195 // GO:0008195 // GO:0003824 // GO:0008195 // GO:0016787	phosphatidate phosphatase activity // phosphatidate phosphatase activity // catalytic activity // phosphatidate phosphatase activity // hydrolase activity	HumanCyc	TRIGLSYN-PWY	chrNA:-1--1	TC05001363.hg.1	8.38026	8.27884	8.23696	7.1833	7.0988	6.97802	6.75624	6.62879	6.69629	6.41351	6.32396	6.33928	8.39022	8.45947	8.33814	8.53754	8.65285	8.54125
403	TC05001391.hg.1	RNU6-806P	ENST00000365147	ENSEMBL	ncrna:known chromosome:GRCh38:5:60304047:60304151:-1 gene:ENSG00000202017 gene_biotype:snRNA transcript_biotype:snRNA	FALSE	chr5	---	---	---	---	---	---	---	---	chrNA:-1--1	TC05001391.hg.1	5.52883	5.05945	4.79385	4.99497	5.24214	5.34239	6.02853	6.02989	6.70689	6.36028	7.00851	7.15832	9.8729	9.90397	9.62771	7.87331	8.39077	8.25469
404	TC05001392.hg.1	DEPDC1B	NM_001145208	RefSeq	Homo sapiens DEP domain containing 1B (DEPDC1B), transcript variant 2, mRNA.	FALSE	chr5	GO:0007264 // GO:0043547 // GO:0051056 // GO:0007165 // GO:0035556	small GTPase mediated signal transduction // positive regulation of GTPase activity // regulation of small GTPase mediated signal transduction // signal transduction // intracellular signal transduction	GO:0005829 // GO:0005622	cytosol // intracellular	GO:0005096	GTPase activator activity	---	---	chrNA:-1--1	TC05001392.hg.1	8.81167	9.17248	8.75355	8.5504	8.58131	8.9829	8.35261	7.82514	7.70375	7.32587	7.5719	7.88703	8.50417	8.64671	8.59095	6.80016	7.14377	7.30683
405	TC05001406.hg.1	ADAMTS6	NM_197941	RefSeq	Homo sapiens ADAM metallopeptidase with thrombospondin type 1 motif, 6 (ADAMTS6), mRNA.	FALSE	chr5	GO:0006508	proteolysis	GO:0005578 // GO:0005576 // GO:0031012	proteinaceous extracellular matrix // extracellular region // extracellular matrix	GO:0004222 // GO:0008237 // GO:0008270 // GO:0008233 // GO:0008237 // GO:0016787 // GO:0046872	metalloendopeptidase activity // metallopeptidase activity // zinc ion binding // peptidase activity // metallopeptidase activity // hydrolase activity // metal ion binding	---	---	chrNA:-1--1	TC05001406.hg.1	6.13222	5.94844	5.99572	8.49312	8.73298	8.69319	5.6101	5.72823	5.49147	5.13233	5.26577	5.59588	4.99037	4.9574	4.86234	5.2937	4.81425	4.80952
406	TC05001408.hg.1	CENPK	NM_022145	RefSeq	Homo sapiens centromere protein K (CENPK), transcript variant 1, mRNA.	FALSE	chr5	GO:0000278 // GO:0006334 // GO:0034080 // GO:0045944	mitotic cell cycle // nucleosome assembly // centromere-specific nucleosome assembly // positive regulation of transcription from RNA polymerase II promoter	GO:0000777 // GO:0005654 // GO:0005829 // GO:0000775 // GO:0000776 // GO:0005634 // GO:0005694	condensed chromosome kinetochore // nucleoplasm // cytosol // chromosome, centromeric region // kinetochore // nucleus // chromosome	---	---	---	---	chrNA:-1--1	TC05001408.hg.1	10.222	10.5763	10.6116	10.8305	10.9093	11.0159	10.587	10.4465	10.6294	10.3904	10.1514	10.5929	10.9394	11.0289	11.17	7.80954	7.60918	8.24487
407	TC05001518.hg.1	LHFPL2	NM_005779	RefSeq	Homo sapiens lipoma HMGIC fusion partner-like 2 (LHFPL2), mRNA.	FALSE	chr5	GO:0008150	biological_process	GO:0016021 // GO:0005575 // GO:0016020	integral component of membrane // cellular_component // membrane	GO:0003674	molecular_function	---	---	chrNA:-1--1	TC05001518.hg.1	5.97569	6.03002	6.08904	6.71435	6.70484	6.70323	5.83618	5.73812	5.91024	6.1419	6.21776	6.42622	5.76508	5.72967	5.81483	6.10609	5.99367	5.90856
408	TC05001538.hg.1	DHFR	NM_000791	RefSeq	Homo sapiens dihydrofolate reductase (DHFR), transcript variant 1, mRNA.	FALSE	chr5	GO:0000082 // GO:0000083 // GO:0000278 // GO:0006545 // GO:0006730 // GO:0006766 // GO:0006767 // GO:0009165 // GO:0031427 // GO:0044281 // GO:0046209 // GO:0046653 // GO:0046654 // GO:0046655 // GO:0050999 // GO:0055114	G1/S transition of mitotic cell cycle // regulation of transcription involved in G1/S transition of mitotic cell cycle // mitotic cell cycle // glycine biosynthetic process // one-carbon metabolic process // vitamin metabolic process // water-soluble vitamin metabolic process // nucleotide biosynthetic process // response to methotrexate // small molecule metabolic process // nitric oxide metabol…	GO:0005575 // GO:0005654 // GO:0005829	cellular_component // nucleoplasm // cytosol	GO:0003723 // GO:0003729 // GO:0004146 // GO:0004146 // GO:0004146 // GO:0008144 // GO:0016491 // GO:0050661	RNA binding // mRNA binding // dihydrofolate reductase activity // dihydrofolate reductase activity // dihydrofolate reductase activity // drug binding // oxidoreductase activity // NADP binding	GenMAPP	Nucleotide_Metabolism	chrNA:-1--1	TC05001538.hg.1	8.36147	9.09428	8.90305	9.17016	8.89522	9.19568	10.8247	10.7573	10.6531	10.7358	10.1623	10.8437	10.0966	10.0601	9.99547	8.5696	8.63431	8.66841
409	TC05001673.hg.1	STARD4	NM_139164	RefSeq	Homo sapiens StAR-related lipid transfer (START) domain containing 4 (STARD4), mRNA.	FALSE	chr5	GO:0006869 // GO:0006810 // GO:0006694 // GO:0030301	lipid transport // transport // steroid biosynthetic process // cholesterol transport	---	---	GO:0008289 // GO:0015485 // GO:0017127	lipid binding // cholesterol binding // cholesterol transporter activity	---	---	chrNA:-1--1	TC05001673.hg.1	7.07496	7.0143	7.0132	7.81309	7.65865	8.11061	5.23304	5.31504	5.34978	5.36636	5.06867	5.41748	6.82114	6.74237	6.92429	7.82591	8.61747	8.87003
410	TC05001675.hg.1	RN7SKP57	ENST00000517248	ENSEMBL	ncrna:known chromosome:GRCh38:5:111719769:111720061:-1 gene:ENSG00000253057 gene_biotype:misc_RNA transcript_biotype:misc_RNA	FALSE	chr5	---	---	---	---	---	---	---	---	chrNA:-1--1	TC05001675.hg.1	6.94759	7.08386	6.52612	5.18728	5.17203	4.90763	4.82518	5.80293	5.61593	5.24395	5.2649	5.30988	5.05894	5.52374	5.071	5.86596	4.85679	4.64246
411	TC05001776.hg.1	AFF4	NM_014423	RefSeq	Homo sapiens AF4/FMR2 family, member 4 (AFF4), mRNA.	FALSE	chr5	GO:0006355 // GO:0006366 // GO:0007286 // GO:0006351	regulation of transcription, DNA-templated // transcription from RNA polymerase II promoter // spermatid development // transcription, DNA-templated	GO:0005634 // GO:0005730 // GO:0005739 // GO:0005634	nucleus // nucleolus // mitochondrion // nucleus	GO:0003700 // GO:0005515	sequence-specific DNA binding transcription factor activity // protein binding	---	---	chrNA:-1--1	TC05001776.hg.1	8.46108	8.46566	8.67111	8.6718	8.5587	8.91578	9.87488	9.71795	9.9118	10.2061	9.94588	10.3859	8.4665	8.65848	8.52979	9.02549	9.61677	9.61452
412	TC05001868.hg.1	SLC25A2	NM_031947	RefSeq	Homo sapiens solute carrier family 25 (mitochondrial carrier; ornithine transporter) member 2 (SLC25A2), mRNA.	FALSE	chr5	GO:0000050 // GO:0006810 // GO:0034641 // GO:0044281	urea cycle // transport // cellular nitrogen compound metabolic process // small molecule metabolic process	GO:0005743 // GO:0016021 // GO:0005739 // GO:0005743 // GO:0016020	mitochondrial inner membrane // integral component of membrane // mitochondrion // mitochondrial inner membrane // membrane	---	---	---	---	chrNA:-1--1	TC05001868.hg.1	7.69993	7.18184	7.20454	7.45626	7.66268	6.7536	6.89707	6.87875	6.7866	7.15408	6.35837	7.31151	6.55688	6.55806	6.89634	7.79952	7.94815	7.48148
413	TC05001880.hg.1	SPRY4	NM_001127496	RefSeq	Homo sapiens sprouty homolog 4 (Drosophila) (SPRY4), transcript variant 2, mRNA.	FALSE	chr5	GO:0007275 // GO:0043407 // GO:0009966	multicellular organismal development // negative regulation of MAP kinase activity // regulation of signal transduction	GO:0005737 // GO:0005794 // GO:0032587 // GO:0005737 // GO:0005886 // GO:0016020 // GO:0042995	cytoplasm // Golgi apparatus // ruffle membrane // cytoplasm // plasma membrane // membrane // cell projection	GO:0005515	protein binding	---	---	chrNA:-1--1	TC05001880.hg.1	5.37604	5.75919	5.57684	6.74571	6.6614	6.65149	5.23077	5.02044	5.19402	5.10066	5.13147	5.31112	5.37233	5.20922	5.25875	5.55995	5.14562	5.40364
414	TC05001917.hg.1	RNU6-732P	ENST00000516033	ENSEMBL	ncrna:known chromosome:GRCh38:5:149057554:149057656:-1 gene:ENSG00000251842 gene_biotype:snRNA transcript_biotype:snRNA	FALSE	chr5	---	---	---	---	---	---	---	---	chrNA:-1--1	TC05001917.hg.1	5.50697	5.58732	5.9001	6.9679	7.13457	7.18659	5.42127	5.21162	5.49317	5.16732	4.70699	5.07002	5.30942	6.21859	5.41271	6.09545	6.0047	6.57278
415	TC05001954.hg.1	FAT2	NM_001447	RefSeq	Homo sapiens FAT atypical cadherin 2 (FAT2), mRNA.	FALSE	chr5	GO:0007156 // GO:0010631 // GO:0007155 // GO:0007156	homophilic cell adhesion // epithelial cell migration // cell adhesion // homophilic cell adhesion	GO:0005634 // GO:0005886 // GO:0005913 // GO:0016021 // GO:0070062 // GO:0016020 // GO:0030054	nucleus // plasma membrane // cell-cell adherens junction // integral component of membrane // extracellular vesicular exosome // membrane // cell junction	GO:0005509	calcium ion binding	---	---	chrNA:-1--1	TC05001954.hg.1	9.44345	10.3973	10.2117	7.24769	6.56497	7.18288	5.32354	5.18006	5.17455	5.19808	5.0961	5.24951	10.3565	10.4926	10.4681	10.9426	11.6078	11.6848
416	TC05001996.hg.1	RNF145	NM_001199380	RefSeq	Homo sapiens ring finger protein 145 (RNF145), transcript variant 1, mRNA.	FALSE	chr5	---	---	GO:0016021 // GO:0016020	integral component of membrane // membrane	GO:0008270 // GO:0046872	zinc ion binding // metal ion binding	---	---	chrNA:-1--1	TC05001996.hg.1	9.77417	9.82935	9.49864	9.25484	9.01743	8.94965	7.48973	7.93233	8.20421	7.56776	7.92045	8.04979	8.01376	8.02806	8.23119	8.84484	9.35844	9.33461
417	TC05002066.hg.1	DUSP1	NM_004417	RefSeq	Homo sapiens dual specificity phosphatase 1 (DUSP1), mRNA.	FALSE	chr5	GO:0000188 // GO:0001706 // GO:0006470 // GO:0006979 // GO:0009416 // GO:0032355 // GO:0032526 // GO:0032870 // GO:0033574 // GO:0035335 // GO:0035556 // GO:0035970 // GO:0042542 // GO:0042981 // GO:0043065 // GO:0043066 // GO:0043407 // GO:0043409 // GO:0051384 // GO:0051447 // GO:0051591 // GO:0051592 // GO:0071850 // GO:0090266 // GO:0001706 // GO:0006470 // GO:0006470 // GO:0006950 // GO:0007…	inactivation of MAPK activity // endoderm formation // protein dephosphorylation // response to oxidative stress // response to light stimulus // response to estradiol // response to retinoic acid // cellular response to hormone stimulus // response to testosterone // peptidyl-tyrosine dephosphorylation // intracellular signal transduction // peptidyl-threonine dephosphorylation // response to hy…	GO:0005634 // GO:0005737 // GO:0005634	nucleus // cytoplasm // nucleus	GO:0004726 // GO:0005515 // GO:0008138 // GO:0008330 // GO:0017017 // GO:0004721 // GO:0004725 // GO:0008138 // GO:0008138 // GO:0016787 // GO:0016791 // GO:0017017	non-membrane spanning protein tyrosine phosphatase activity // protein binding // protein tyrosine/serine/threonine phosphatase activity // protein tyrosine/threonine phosphatase activity // MAP kinase tyrosine/serine/threonine phosphatase activity // phosphoprotein phosphatase activity // protein tyrosine phosphatase activity // protein tyrosine/serine/threonine phosphatase activity // protein t…	---	---	chrNA:-1--1	TC05002066.hg.1	5.80972	6.00354	6.00526	6.86098	7.02132	7.02877	6.43362	6.23056	6.26943	6.817	7.23803	7.22178	5.7614	5.72883	5.84121	5.98077	5.88279	6.01675
418	TC05002075.hg.1	STC2	NM_003714	RefSeq	Homo sapiens stanniocalcin 2 (STC2), mRNA.	FALSE	chr5	GO:0006874 // GO:0006979 // GO:0007166 // GO:0007267 // GO:0007566 // GO:0007584 // GO:0030968 // GO:0033280 // GO:0040015 // GO:0043434 // GO:0046697 // GO:0071456 // GO:2001256 // GO:0034976 // GO:0055074	cellular calcium ion homeostasis // response to oxidative stress // cell surface receptor signaling pathway // cell-cell signaling // embryo implantation // response to nutrient // endoplasmic reticulum unfolded protein response // response to vitamin D // negative regulation of multicellular organism growth // response to peptide hormone // decidualization // cellular response to hypoxia // regu…	GO:0005615 // GO:0005783 // GO:0005794 // GO:0005576	extracellular space // endoplasmic reticulum // Golgi apparatus // extracellular region	GO:0005179 // GO:0005179	hormone activity // hormone activity	---	---	chrNA:-1--1	TC05002075.hg.1	9.93578	10.2332	10.1349	12.8135	12.5693	13.0087	8.91469	9.36456	9.31139	10.1367	10.2704	10.7863	7.80134	8.09354	8.36078	8.41206	9.05018	8.94132
419	TC05002091.hg.1	KIAA1191	NM_001079684	RefSeq	Homo sapiens KIAA1191 (KIAA1191), transcript variant 2, mRNA.	FALSE	chr5	GO:0055114 // GO:0008150	oxidation-reduction process // biological_process	GO:0005737 // GO:0005575 // GO:0005737	cytoplasm // cellular_component // cytoplasm	GO:0016491 // GO:0003674	oxidoreductase activity // molecular_function	---	---	chrNA:-1--1	TC05002091.hg.1	9.58623	9.98899	9.97849	10.0226	10.1288	10.6737	9.69102	9.20564	9.27009	10.0754	9.40536	10.1191	9.25657	9.35612	8.89485	10.2518	10.2198	10.6565
420	TC05002138.hg.1	MGAT4B	NM_014275	RefSeq	Homo sapiens mannosyl (alpha-1,3-)-glycoprotein beta-1,4-N-acetylglucosaminyltransferase, isozyme B (MGAT4B), transcript variant 1, mRNA.	FALSE	chr5	GO:0006491 // GO:0018279 // GO:0043687 // GO:0044267 // GO:0005975 // GO:0006486	N-glycan processing // protein N-linked glycosylation via asparagine // post-translational protein modification // cellular protein metabolic process // carbohydrate metabolic process // protein glycosylation	GO:0000139 // GO:0016021 // GO:0000139 // GO:0005794 // GO:0016020	Golgi membrane // integral component of membrane // Golgi membrane // Golgi apparatus // membrane	GO:0008454 // GO:0046872 // GO:0008454 // GO:0016740 // GO:0016757 // GO:0016758	alpha-1,3-mannosylglycoprotein 4-beta-N-acetylglucosaminyltransferase activity // metal ion binding // alpha-1,3-mannosylglycoprotein 4-beta-N-acetylglucosaminyltransferase activity // transferase activity // transferase activity, transferring glycosyl groups // transferase activity, transferring hexosyl groups	---	---	chrNA:-1--1	TC05002138.hg.1	8.15567	8.38505	8.02531	8.26694	8.00671	8.21522	7.63621	7.66605	7.67902	8.53518	8.46217	8.58784	7.44875	7.35752	7.40889	8.0935	8.36328	8.39621
421	TC05002145.hg.1	MAPK9	NM_001135044	RefSeq	Homo sapiens mitogen-activated protein kinase 9 (MAPK9), transcript variant JNK2-g, mRNA.	FALSE	chr5	GO:0001836 // GO:0001934 // GO:0002224 // GO:0002755 // GO:0002756 // GO:0006626 // GO:0006919 // GO:0006950 // GO:0007254 // GO:0007254 // GO:0007258 // GO:0007417 // GO:0009612 // GO:0009636 // GO:0010628 // GO:0010744 // GO:0010770 // GO:0014075 // GO:0031175 // GO:0031394 // GO:0031396 // GO:0032308 // GO:0032722 // GO:0034134 // GO:0034138 // GO:0034142 // GO:0034146 // GO:0034162 // GO:0034…	release of cytochrome c from mitochondria // positive regulation of protein phosphorylation // toll-like receptor signaling pathway // MyD88-dependent toll-like receptor signaling pathway // MyD88-independent toll-like receptor signaling pathway // protein targeting to mitochondrion // activation of cysteine-type endopeptidase activity involved in apoptotic process // response to stress // JNK ca…	GO:0005654 // GO:0005739 // GO:0005829 // GO:0005634 // GO:0005737 // GO:0005829	nucleoplasm // mitochondrion // cytosol // nucleus // cytoplasm // cytosol	GO:0004705 // GO:0005515 // GO:0005524 // GO:0008134 // GO:0008656 // GO:0031435 // GO:0000166 // GO:0004672 // GO:0004674 // GO:0004705 // GO:0004707 // GO:0008134 // GO:0016301 // GO:0016740 // GO:0016772	JUN kinase activity // protein binding // ATP binding // transcription factor binding // cysteine-type endopeptidase activator activity involved in apoptotic process // mitogen-activated protein kinase kinase kinase binding // nucleotide binding // protein kinase activity // protein serine/threonine kinase activity // JUN kinase activity // MAP kinase activity // transcription factor binding // k…	GenMAPP // GenMAPP	TGF_Beta_Signaling_Pathway // Wnt_signaling	chrNA:-1--1	TC05002145.hg.1	9.28344	9.47983	9.38898	10.2251	10.4115	10.501	8.05314	8.29541	7.9485	8.6756	8.58617	9.0343	8.91974	8.63716	8.9035	8.64022	9.04878	9.20045
422	TC05002418.hg.1	CCNB1	AY027770	NONCODE	accn=AY027770 class=mRNAlike lncRNA name=NULL ref=H-invitational v7.5 transcriptId=HIT000083270 cpcScore=1.5982400 cnci=-0.3475018	FALSE	chr5	GO:0000079 // GO:0000082 // GO:0000086 // GO:0000278 // GO:0001556 // GO:0001701 // GO:0001933 // GO:0006461 // GO:0006468 // GO:0007077 // GO:0007080 // GO:0007283 // GO:0009612 // GO:0010629 // GO:0031145 // GO:0031442 // GO:0033129 // GO:0042246 // GO:0042493 // GO:0043148 // GO:0045931 // GO:0046680 // GO:0048565 // GO:0051437 // GO:0051439 // GO:0051726 // GO:0051987 // GO:0055015 // GO:0060…	regulation of cyclin-dependent protein serine/threonine kinase activity // G1/S transition of mitotic cell cycle // G2/M transition of mitotic cell cycle // mitotic cell cycle // oocyte maturation // in utero embryonic development // negative regulation of protein phosphorylation // protein complex assembly // protein phosphorylation // mitotic nuclear envelope disassembly // mitotic metaphase pl…	GO:0000922 // GO:0000942 // GO:0005634 // GO:0005654 // GO:0005737 // GO:0005813 // GO:0005829 // GO:0016020 // GO:0005634 // GO:0005737 // GO:0005815 // GO:0005856	spindle pole // condensed nuclear chromosome outer kinetochore // nucleus // nucleoplasm // cytoplasm // centrosome // cytosol // membrane // nucleus // cytoplasm // microtubule organizing center // cytoskeleton	GO:0005113 // GO:0005515 // GO:0016301 // GO:0019901 // GO:0019901	patched binding // protein binding // kinase activity // protein kinase binding // protein kinase binding	GenMAPP // GenMAPP	Cell_cycle_KEGG // G1_to_S_cell_cycle_Reactome	chrNA:-1--1	TC05002418.hg.1	15.4575	15.8157	15.3081	14.1075	14.289	14.3625	16.5314	16.153	15.6231	14.4642	14.5631	15.0304	15.894	15.7512	16.0074	13.3887	13.5649	13.6889
423	TC05002434.hg.1	MAP1B	BC032516	NONCODE	accn=BC032516 class=mRNAlike lncRNA name=Human lncRNA ref=JounralRNA transcriptId=2954 cpcScore=13.3349000 cnci=-0.2907612	FALSE	chr5	GO:0001578 // GO:0008152 // GO:0009987 // GO:0016358 // GO:0032387 // GO:0045773 // GO:0047497 // GO:0048675 // GO:0061162 // GO:0000226 // GO:0007409	microtubule bundle formation // metabolic process // cellular process // dendrite development // negative regulation of intracellular transport // positive regulation of axon extension // mitochondrion transport along microtubule // axon extension // establishment of monopolar cell polarity // microtubule cytoskeleton organization // axonogenesis	GO:0005737 // GO:0005829 // GO:0005874 // GO:0005875 // GO:0005886 // GO:0030054 // GO:0043197 // GO:0045202 // GO:0005737 // GO:0005856 // GO:0042995	cytoplasm // cytosol // microtubule // microtubule associated complex // plasma membrane // cell junction // dendritic spine // synapse // cytoplasm // cytoskeleton // cell projection	GO:0005198 // GO:0005515 // GO:0008017 // GO:0016787	structural molecule activity // protein binding // microtubule binding // hydrolase activity	---	---	chrNA:-1--1	TC05002434.hg.1	8.5348	8.55801	8.8578	10.4387	10.4496	11.005	14.5066	13.9265	14.2951	13.5333	12.2804	12.9987	5.26515	5.04751	4.97492	5.56983	4.91381	4.66187
424	TC05002454.hg.1	HMGCR	AY429542	NONCODE	accn=AY429542 class=mRNAlike lncRNA name=NULL ref=H-invitational v7.5 transcriptId=HIT000254630 cpcScore=0.8111240 cnci=-0.2205311	FALSE	chr5	GO:0006695 // GO:0006743 // GO:0007568 // GO:0007584 // GO:0008299 // GO:0008542 // GO:0009790 // GO:0010664 // GO:0010666 // GO:0015936 // GO:0032874 // GO:0043407 // GO:0044255 // GO:0044281 // GO:0045445 // GO:0045471 // GO:0045908 // GO:0048643 // GO:0048661 // GO:0051262 // GO:0055114 // GO:0061045 // GO:0061179 // GO:0070374 // GO:0006629 // GO:0006694 // GO:0006695 // GO:0008202 // GO:0008…	cholesterol biosynthetic process // ubiquinone metabolic process // aging // response to nutrient // isoprenoid biosynthetic process // visual learning // embryo development // negative regulation of striated muscle cell apoptotic process // positive regulation of cardiac muscle cell apoptotic process // coenzyme A metabolic process // positive regulation of stress-activated MAPK cascade // negat…	GO:0005778 // GO:0005783 // GO:0005789 // GO:0016021 // GO:0005783 // GO:0005789 // GO:0016020 // GO:0043231	peroxisomal membrane // endoplasmic reticulum // endoplasmic reticulum membrane // integral component of membrane // endoplasmic reticulum // endoplasmic reticulum membrane // membrane // intracellular membrane-bounded organelle	GO:0004420 // GO:0005515 // GO:0042282 // GO:0042803 // GO:0050662 // GO:0070402 // GO:0016491 // GO:0016616 // GO:0042282 // GO:0050661 // GO:0050662	hydroxymethylglutaryl-CoA reductase (NADPH) activity // protein binding // hydroxymethylglutaryl-CoA reductase activity // protein homodimerization activity // coenzyme binding // NADPH binding // oxidoreductase activity // oxidoreductase activity, acting on the CH-OH group of donors, NAD or NADP as acceptor // hydroxymethylglutaryl-CoA reductase activity // NADP binding // coenzyme binding	GenMAPP // GenMAPP	Cholesterol_Biosynthesis // Statin_Pathway_PharmGKB	chrNA:-1--1	TC05002454.hg.1	16.6534	16.4008	16.3667	17.0368	17.247	17.0533	15.5691	16.8063	16.6614	14.387	15.3282	15.6194	13.7583	13.688	14.6952	16.1998	17.5323	17.3749
425	TC05002512.hg.1	NR2F1	AF087978	NONCODE	accn=AF087978 class=mRNAlike lncRNA name=Human lncRNA ref=JounralRNA transcriptId=3011 cpcScore=-1.1324700 cnci=-0.3278552	FALSE	chr5	GO:0000122 // GO:0001764 // GO:0006367 // GO:0007165 // GO:0010467 // GO:0010977 // GO:0021796 // GO:0030522 // GO:0030522 // GO:0043401 // GO:0045944 // GO:0000122 // GO:0006351 // GO:0006355 // GO:0007399 // GO:0030900	negative regulation of transcription from RNA polymerase II promoter // neuron migration // transcription initiation from RNA polymerase II promoter // signal transduction // gene expression // negative regulation of neuron projection development // cerebral cortex regionalization // intracellular receptor signaling pathway // intracellular receptor signaling pathway // steroid hormone mediated s…	GO:0005634 // GO:0005654 // GO:0005634	nucleus // nucleoplasm // nucleus	GO:0003700 // GO:0003707 // GO:0003713 // GO:0004879 // GO:0005515 // GO:0008270 // GO:0043565 // GO:0044323 // GO:0003677 // GO:0003700 // GO:0003700 // GO:0004879 // GO:0043565 // GO:0046872	sequence-specific DNA binding transcription factor activity // steroid hormone receptor activity // transcription coactivator activity // ligand-activated sequence-specific DNA binding RNA polymerase II transcription factor activity // protein binding // zinc ion binding // sequence-specific DNA binding // retinoic acid-responsive element binding // DNA binding // sequence-specific DNA binding tr…	GenMAPP	Nuclear_Receptors	chrNA:-1--1	TC05002512.hg.1	8.61641	8.68889	8.66011	7.14888	7.08054	6.85611	13.6425	13.6773	13.5356	11.0269	10.8279	10.2521	8.85129	9.22157	9.65917	8.48719	7.71695	8.31656
426	TC05002515.hg.1	ANKRD32	BC054885	NONCODE	accn=BC054885 class=mRNAlike lncRNA name=Human lncRNA ref=JounralRNA transcriptId=3012 cpcScore=6.0381600 cnci=-0.4240575	FALSE	chr5	---	---	GO:0005634 // GO:0005813	nucleus // centrosome	---	---	---	---	chrNA:-1--1	TC05002515.hg.1	5.52203	5.73615	5.8858	5.71221	5.78425	6.0028	7.11625	7.16252	7.28793	6.44071	6.65346	7.16403	7.20235	6.9238	6.85446	5.80428	5.28117	5.30191
427	TC05002564.hg.1	EPB41L4A-AS1	ENST00000413221	NONCODE	accn=NULL class=lncRNA name= ref=EnsemblNoncode transcriptId=ENST00000413221 cpcScore=3.5998800 cnci=-0.3818474 gene:ENSG00000224032	FALSE	chr5	GO:0008150	biological_process	GO:0005575 // GO:0005737 // GO:0005856 // GO:0019898	cellular_component // cytoplasm // cytoskeleton // extrinsic component of membrane	GO:0003674 // GO:0008092	molecular_function // cytoskeletal protein binding	---	---	chrNA:-1--1	TC05002564.hg.1	7.56333	7.48295	7.14728	8.48925	8.83434	8.56451	6.33999	6.32796	6.24931	8.15808	8.37762	8.55962	6.79847	6.79387	6.56058	8.14938	8.24255	8.37771
428	TC05002611.hg.1	SLC12A2	AF439152	NONCODE	accn=AF439152 class=mRNAlike lncRNA name=NULL ref=H-invitational v7.5 transcriptId=HIT000079665 cpcScore=4.0850400 cnci=-0.2476181	FALSE	chr5	GO:0006810 // GO:0006811 // GO:0006813 // GO:0006814 // GO:0006972 // GO:0007214 // GO:0015696 // GO:0030321 // GO:0035264 // GO:0045795 // GO:0050910 // GO:0055085 // GO:0060444 // GO:0060763 // GO:0070634 // GO:0072488 // GO:1902476 // GO:1902476 // GO:0006810 // GO:0006811 // GO:0006821 // GO:0055085	transport // ion transport // potassium ion transport // sodium ion transport // hyperosmotic response // gamma-aminobutyric acid signaling pathway // ammonium transport // transepithelial chloride transport // multicellular organism growth // positive regulation of cell volume // detection of mechanical stimulus involved in sensory perception of sound // transmembrane transport // branching invo…	GO:0005886 // GO:0005887 // GO:0016020 // GO:0016323 // GO:0016324 // GO:0070062 // GO:0005886 // GO:0016020 // GO:0016021	plasma membrane // integral component of plasma membrane // membrane // basolateral plasma membrane // apical plasma membrane // extracellular vesicular exosome // plasma membrane // membrane // integral component of membrane	GO:0005515 // GO:0008511 // GO:0008519 // GO:0005215 // GO:0008511 // GO:0015293 // GO:0015377	protein binding // sodium:potassium:chloride symporter activity // ammonium transmembrane transporter activity // transporter activity // sodium:potassium:chloride symporter activity // symporter activity // cation:chloride symporter activity	---	---	chrNA:-1--1	TC05002611.hg.1	10.3341	10.3442	10.2474	9.06927	8.84357	9.29668	8.84449	8.50573	8.23666	6.90962	7.11947	7.80795	9.27585	9.35964	9.88859	8.21598	8.84408	8.67339
429	TC05002612.hg.1	SLC12A2	Z36839	NONCODE	accn=Z36839 class=mRNAlike lncRNA name=NULL ref=H-invitational v7.5 transcriptId=HIT000327147 cpcScore=-1.0955700 cnci=-0.4886855	FALSE	chr5	GO:0006810 // GO:0006811 // GO:0006813 // GO:0006814 // GO:0006972 // GO:0007214 // GO:0015696 // GO:0030321 // GO:0035264 // GO:0045795 // GO:0050910 // GO:0055085 // GO:0060444 // GO:0060763 // GO:0070634 // GO:0072488 // GO:1902476 // GO:1902476 // GO:0006810 // GO:0006811 // GO:0006821 // GO:0055085	transport // ion transport // potassium ion transport // sodium ion transport // hyperosmotic response // gamma-aminobutyric acid signaling pathway // ammonium transport // transepithelial chloride transport // multicellular organism growth // positive regulation of cell volume // detection of mechanical stimulus involved in sensory perception of sound // transmembrane transport // branching invo…	GO:0005886 // GO:0005887 // GO:0016020 // GO:0016323 // GO:0016324 // GO:0070062 // GO:0005886 // GO:0016020 // GO:0016021	plasma membrane // integral component of plasma membrane // membrane // basolateral plasma membrane // apical plasma membrane // extracellular vesicular exosome // plasma membrane // membrane // integral component of membrane	GO:0005515 // GO:0008511 // GO:0008519 // GO:0005215 // GO:0008511 // GO:0015293 // GO:0015377	protein binding // sodium:potassium:chloride symporter activity // ammonium transmembrane transporter activity // transporter activity // sodium:potassium:chloride symporter activity // symporter activity // cation:chloride symporter activity	---	---	chrNA:-1--1	TC05002612.hg.1	13.8118	13.4017	13.2013	11.4885	11.1645	11.2537	10.4858	10.6563	10.2896	8.19553	8.93465	8.93933	11.7491	11.5059	11.9133	9.49902	10.8428	10.4205
430	TC05002667.hg.1	---	TCONS_00010118-XLOC_004584	Rinn lincRNA	linc-ARHGAP26-6 chr5:+:141543139-141548174	FALSE	chr5	---	---	---	---	---	---	---	---	chrNA:-1--1	TC05002667.hg.1	5.04682	5.22213	5.19521	6.01226	6.1601	5.71986	4.20106	4.0339	3.77885	4.03924	4.58173	4.64524	4.35969	4.50269	3.90166	4.8553	4.95662	5.2968
431	TC05002669.hg.1	---	linc_luo_247	NONCODE	accn=NULL class=lincRNA name=Human lincRNA ref=Scripture Reconstruction LincRNAs By Luo transcriptId=linc_luo_247 cpcScore=-1.3456200 cnci=-0.2435945	FALSE	chr5	---	---	---	---	---	---	---	---	chrNA:-1--1	TC05002669.hg.1	5.18133	5.08219	5.22657	6.27608	6.30384	5.99859	4.73695	4.81525	4.95142	5.18823	5.02208	5.19733	4.76551	4.94024	4.72137	5.02493	4.85171	4.89367
432	TC05002942.hg.1	---	TCONS_l2_00023703-XLOC_l2_011983	Broad TUCP	linc-ZFR-3 chr5:-:32925744-33023433	FALSE	chr5	---	---	---	---	---	---	---	---	chrNA:-1--1	TC05002942.hg.1	4.85906	4.60217	4.87483	5.87947	6.16495	6.12264	4.58118	4.39081	4.63406	4.10522	4.59427	4.74191	4.1595	4.62516	4.72272	5.10779	4.68497	4.10467
[truncated: 992 more rows]
