# Supplementary material for: CDK4/6 Inhibitor as a Novel Therapeutic Approach for Advanced Bladder Cancer Independently of RB1 Status
Source: Oxford University Press journal article supplement (doi:10.1158/1078-0432.ccr-18-0685), 2018-09-21
Supplement: 10780432ccr180685-sup-197850_4_supp_5032068_pf3741.xlsx [file 10780432ccr180685-sup-197850_4_supp_5032068_pf3741.xlsx]

## Sheet: tum vs treated
Original row	Name	Gene Symbol	Group tum mean	GroupA std.dev.	Group treated mean	GroupB std.dev.	Absolute t value	Fold change tum-treated	Degrees of freedom	Raw p value	Adj p value	False Discovery Rate	tum1	tum2	tum3	CT1	CT2	CT4	CT5	CT6	tum-1	tum-2	tum-3	tum-4	M1	M2	M3	M4	PALBO-MET	PALBO1	PALBO2	PALBO3
28949	TC0800000317.mm.1	---	-0.756378	0.501691	1.74296	0.713838	5.50922	-2.49933	2	0	0	0	-0.14807	-0.886599	-1.22607	0.20225	0.495031	0.455091	0.943206	0.366376	-0.0157394	-1.27996	-0.704085	-1.03412	-1.07768	-0.413321	-0.305174	-0.639077	0.0390735	1.00571	1.79235	2.43082
26222	TC0700002227.mm.1	---	-0.799229	0.535292	1.54159	0.908617	4.16327	-2.34082	2	0	0	0	-0.309385	0.141339	-1.43405	0.378863	0.289161	1.00327	0.366981	0.584247	-0.868085	-1.11924	-0.972978	-1.03221	-0.973048	-1.12952	0.0144064	0.191352	0.244135	0.53671	1.78277	2.30528
35191	TC0M00000015.mm.1	mt-Ts2 // mt-Tl2	-0.714434	0.553711	1.62585	0.183788	9.97368	-2.34029	7	0	0	0	-0.358434	-0.453439	0.0454883	1.46033	0.303679	-0.338392	-0.0406442	-0.422787	-1.05351	-0.444198	-1.47736	-1.25958	-0.689247	-1.25759	-0.220543	0.867008	0.461659	1.54779	1.83579	1.49398
56856	TC1500002045.mm.1	---	-0.90646	0.416953	1.42853	0.477703	7.35079	-2.33499	3	0	0	0	-0.961682	-0.907008	-1.24386	0.598533	0.329277	-0.340234	0.50356	-0.505039	-0.941084	-0.227775	-0.566652	-1.49716	-1.29981	0.31285	1.26853	0.132996	1.05898	0.87705	1.71447	1.69407
9674	TC0300000365.mm.1	---	-1.03646	0.59528	1.2901	0.661739	5.24731	-2.32657	3	0	0	0	-0.805955	-1.69945	-1.71779	0.798747	0.694665	0.469901	0.674082	1.12309	-0.804638	-0.534258	-0.217613	-1.47556	-0.417647	-0.121901	-0.335277	0.220285	0.279001	0.613142	1.32168	1.93549
4612	TC0200000778.mm.1	Gm19922	-0.817219	0.309515	1.45145	0.731645	5.17589	-2.26867	2	0	0	0	-1.22867	-0.497151	-0.872956	0.787602	1.10806	-0.833877	-0.7933	0.423246	-0.603275	-0.928917	-0.447866	-1.1417	-1.07076	-0.331024	0.256764	1.03291	0.786552	0.637873	2.0554	1.66109
24604	TC0700000597.mm.1	Scgb1b29 // Scgb1b29 // Scgb1b29 // Scgb1b29 // Scgb1b29	-0.762939	0.605971	1.49925	0.879736	4.06016	-2.26219	2	0	0	0	-0.71958	-0.515646	-1.13174	0.542122	0.9395	-0.955311	0.973364	-0.292188	0.209917	-0.343121	-1.32674	-1.51366	-0.533966	-0.738617	0.369037	0.583384	-0.0444862	0.960753	1.02254	2.51445
5288	TC0200001457.mm.1	Gm23487	-0.895699	0.535293	1.35837	0.922231	3.95732	-2.25407	2	0	0	0	-1.51037	-1.01711	-0.616188	0.984969	1.248	-0.267999	0.930738	-0.432145	-0.420326	-1.48015	-0.102481	-1.12328	-0.667503	0.0349579	-0.294527	0.216035	0.442264	0.293498	1.89774	1.88387
35451	TC0X00000250.mm.1	Gm26302	-0.831077	0.359982	1.40245	0.979315	3.84066	-2.23353	2	0	0	0	-0.726457	-1.36366	-0.890767	1.12436	1.30327	-0.143726	0.134259	-0.208664	-0.344592	-0.529459	-0.750439	-1.21216	-1.27306	-0.257128	-0.219531	0.322934	0.827463	0.291113	1.77716	2.13909
42555	TC1100000196.mm.1	---	-0.646504	0.439905	1.58542	0.483651	6.86769	-2.23192	3	0	0	0	-0.822405	-0.785691	-0.106545	0.858265	0.80946	-0.257406	-0.988185	-0.821173	-0.223492	-0.597943	-0.550086	-1.43937	-1.17847	-0.509493	1.38478	-0.00770683	0.479203	1.04856	1.72059	1.9871
55042	TC1500000209.mm.1	---	-0.91475	0.507496	1.30822	0.960754	3.78751	-2.22297	2	0	0	0	-1.64321	-0.879971	-1.19761	1.00121	1.29293	0.538221	-0.0226785	0.579648	-0.214152	-1.06447	-0.295966	-1.10788	-0.347148	-0.433615	-0.772899	0.00206046	0.640866	0.248024	1.55541	2.12123
35198	TC0M00000022.mm.1	mt-Tn	-0.697588	0.436024	1.51672	0.656192	5.35964	-2.21431	2	0	0	0	-1.2296	-0.506632	-0.386648	1.54373	1.40596	-0.217686	0.167041	-0.616322	-0.207964	-0.615617	-1.37543	-0.561226	-0.607015	-0.46595	0.0908365	0.153951	-1.12158	2.00645	0.771144	1.77256
1223	TC0100001238.mm.1	Gm22232	-0.837069	0.584322	1.3605	1.01095	3.5214	-2.19757	2	0	0	0	-1.68397	-0.814505	-0.420841	0.912898	1.21198	0.398166	-0.718104	0.00912483	-0.939756	-0.111697	-0.397608	-1.4911	-0.750346	0.223084	-0.557079	0.507147	0.541118	0.203984	1.80134	2.07617
3938	TC0200000097.mm.1	Mir466f-2	-0.803108	0.508139	1.39375	0.950825	3.77736	-2.19686	2	0	0	0	-1.17731	-1.10929	-0.0182019	1.18113	0.745217	-0.233704	-0.0914815	0.942264	-0.883737	-0.355899	-0.601673	-1.47564	-0.873858	-0.0074709	0.0228533	-1.01799	0.773549	0.318194	1.7406	2.12245
35194	TC0M00000018.mm.1	---	-0.959791	0.678451	1.23695	0.378602	6.51945	-2.19674	6	0	0	0	-2.03952	-1.49038	-0.584423	1.19378	1.20323	-0.22399	0.512227	0.395887	-1.15454	0.0536565	-0.856318	-0.647013	-0.14663	1.05515	-0.357486	-0.550165	-0.0743242	0.827995	1.30761	1.57524
10481	TC0300001184.mm.1	Mir669n	-0.794819	0.52019	1.39785	0.729513	4.71729	-2.19267	2	0	0	0	0.0385127	-0.576224	-0.93235	0.261235	1.04966	0.539221	1.29234	0.00450514	-0.475789	-1.4087	-0.794835	-1.41434	-1.41109	-0.114437	3.02e-05	-0.781814	0.530528	0.55994	1.89178	1.74182
25483	TC0700001479.mm.1	Gm15120	-0.519845	0.889766	1.664	0.298159	5.78048	-2.18385	7	0	0	0	0.230186	-1.06992	0.143952	1.18634	-0.612901	0.0355367	0.067361	0.0657437	-1.94639	0.547353	-1.03962	-0.504478	-1.30858	-0.364637	-0.395604	-0.211068	0.184714	1.7193	1.93064	1.34207
55576	TC1500000749.mm.1	Gm26199	-0.725922	0.505072	1.45535	0.727803	4.72619	-2.18127	2	0	0	0	-0.978858	0.0886736	-0.429881	0.714721	1.05747	-0.858606	-0.00910068	0.0164303	-0.962184	-1.44464	-0.940238	-0.414325	-1.20034	-0.391041	-0.608275	0.841392	1.15276	0.62027	1.95462	1.79115
15666	TC0400003163.mm.1	Gm12790	-0.769768	0.339171	1.40865	0.76416	4.74151	-2.17842	2	0	0	0	-1.17503	-0.52933	-0.58498	-0.571775	0.885908	0.784653	-1.60314	1.00932	-0.942603	-0.810562	-0.234908	-1.11096	-0.775039	0.256351	0.819111	-0.223921	0.580959	0.542624	1.98809	1.69524
59542	TC1700000225.mm.1	Vmn2r-ps116	-1.01814	0.491899	1.15544	0.990222	3.61555	-2.17359	2	0	0	0	-0.535404	-0.388257	-1.6423	0.372491	0.167164	0.220277	0.224638	0.872518	-0.941679	-1.66757	-0.950873	-1.00093	-0.550037	0.885483	0.653301	1.25986	-0.445005	0.12015	2.09341	1.25277
7218	TC0200003406.mm.1	---	-0.754677	0.42072	1.41215	0.856938	4.16954	-2.16683	2	0	0	0	-0.635305	-0.558218	-0.234174	0.894148	0.742775	0.209113	-0.44541	0.177909	-0.501187	-0.992978	-0.823596	-1.53728	-1.23767	-0.888124	-0.493826	1.3006	0.786774	0.424347	1.85578	1.95632
62976	TC1800000877.mm.1	Gm26258	-0.852331	0.367216	1.31428	0.751332	4.75713	-2.16661	2	0	0	0	-0.769175	-0.808884	-1.42804	1.04235	1.06896	1.06439	0.368474	-1.19283	-0.631085	-0.53329	-0.501722	-1.29412	-1.0991	-0.348758	0.328994	0.147287	0.643696	0.459574	1.61278	1.8705
33374	TC0900001533.mm.1	Gm26303	-0.939307	0.470238	1.21515	0.487464	6.47255	-2.15446	3	0	0	0	-0.556389	-0.809092	-1.22193	0.85531	1.10901	0.866137	0.623974	0.84381	-0.515401	-1.71277	-0.493612	-1.26596	-1.16127	0.163416	-1.05344	0.166609	0.516144	0.655123	1.54414	1.44619
22224	TC0600001810.mm.1	Pdk4 // Pdk4 // Pdk4 // Pdk4 // Pdk4 // Pdk4 // Pdk4 // Pdk4	-0.502824	0.570322	1.65145	1.38107	2.60813	-2.15427	2	0	0	0	-0.418407	-1.6085	0.0456861	0.384786	0.623905	-0.542241	0.178626	-0.0138943	-0.262522	0.0290845	-0.78596	-0.519154	0.187551	-0.680838	0.0712311	-0.290869	-1.35284	2.35583	0.060215	2.5383
8990	TC0200005194.mm.1	---	-0.919089	0.387692	1.23055	0.767796	4.60427	-2.14964	2	0	0	0	-0.684351	-0.969526	-0.710312	1.14294	1.01159	0.39998	1.14423	0.260532	-0.97757	-1.68369	-0.459026	-0.949149	-1.18233	-0.0986435	-0.816008	0.178943	0.700754	0.349584	1.58478	1.75727
41389	TC1000002252.mm.1	2010107G23Rik // 2010107G23Rik // 2010107G23Rik // 2010107G23Rik // 2010107G23Rik // 2010107G23Rik // 2010107G23Rik // 2010107G23Rik // 2010107G23Rik // 2010107G23Rik // 2010107G23Rik // 2010107G23Rik // 2010107G23Rik // 2010107G23Rik // 2010107G23Rik // 2010107G23Rik	-0.663774	0.742936	1.47464	0.316874	6.38061	-2.13841	7	0	0	0	0.19226	0.198244	-0.216676	0.372479	0.276881	0.647787	0.307315	1.6356	-1.18476	-1.00772	-1.76162	-0.866141	-0.87641	-0.798771	0.0683932	-0.891187	-0.519574	1.13619	1.52343	1.76428
56069	TC1500001248.mm.1	Gm22104	-0.897786	0.655109	1.24022	0.645984	4.77586	-2.13801	3	0	0	0	-1.40663	-0.595969	0.330142	0.900925	1.19044	-0.0802582	0.280639	-0.403347	-1.0985	-1.69657	-0.769545	-1.04743	-0.596131	0.291345	-0.844288	1.05301	0.771501	0.560952	1.31295	1.84676
49013	TC1200002408.mm.1	---	-0.667139	0.498174	1.46768	0.482698	6.34734	-2.13482	3	0	0	0	-0.802899	-0.345399	-0.177171	0.67041	-0.101782	-0.118408	-0.0786542	-0.92618	-1.44763	-0.455668	-0.237154	-1.20406	-1.53848	-0.423765	0.742468	0.33215	1.70918	0.936724	1.88	1.58631
35184	TC0M00000008.mm.1	mt-Tk	-0.624408	0.735751	1.5085	0.418838	5.78774	-2.1329	6	0	0	0	-1.34779	-0.467974	0.0336254	1.04456	0.468107	-0.556768	-0.495004	-0.382997	-0.0577502	0.225669	-1.58655	-1.17009	-0.933483	1.63202	-0.237661	-0.31854	-0.374867	1.26477	1.99212	1.2686
2969	TC0100003006.mm.1	Gm24397	-0.896871	0.552512	1.23573	0.75005	4.43584	-2.1326	2	0	0	0	-1.25131	-0.661261	-1.14594	1.04954	1.08903	0.500223	-0.505669	-0.0545829	0.0417826	-1.51011	-0.469178	-1.28208	-1.23901	0.0902577	-0.072929	0.763458	0.950594	0.372762	1.60362	1.7308
36343	TC0X00001155.mm.1	Gm24683	-0.722797	0.587249	1.40671	0.830251	4.03132	-2.12951	2	0	0	0	-0.917379	-1.29636	-0.929146	0.922606	1.32625	-0.211549	-0.675447	-0.250692	0.118232	-0.0978701	-0.498889	-1.43817	-1.14804	-0.251594	0.553736	-0.395513	0.969685	0.472791	1.68616	2.06119
1683	TC0100001702.mm.1	Gm19846	-0.875212	0.438407	1.25232	1.1258	3.17178	-2.12753	2	0	0	0	-0.802865	-0.366493	-1.55925	0.454426	1.20762	1.02706	0.198705	-0.548261	-1.37663	-0.721687	-0.799168	-0.500388	-1.20064	0.265297	-0.169112	0.592694	0.54173	0.00319854	2.18864	1.56513
12369	TC0300003098.mm.1	Gm22901	-0.811284	0.583954	1.30113	0.817549	4.05401	-2.11241	2	0	0	0	-1.31522	-1.13469	-0.611347	1.13036	1.2643	-0.489395	-0.534955	-0.155985	0.128918	-0.793248	-0.381525	-1.57188	-0.97301	-0.12989	0.936927	-0.0830679	0.810327	0.376124	1.92692	1.60034
33375	TC0900001534.mm.1	Gm25510	-0.943468	0.557004	1.16195	0.431098	6.4585	-2.10541	5	0	0	0	-0.569337	-0.607993	-0.936115	0.867625	1.09523	0.524033	-0.111354	1.23385	-0.766143	-2.03022	-0.412519	-1.28195	-0.961286	-0.140835	-0.817987	0.502973	0.926186	0.684711	1.52316	1.27797
41649	TC1000002513.mm.1	Gm17151 // RP24-121A12.3	-0.82222	0.764917	1.27789	0.351572	5.94507	-2.10011	7	0	0	0	-1.22391	-1.2281	-1.43217	0.851159	0.222875	-0.135413	-0.558402	1.50186	0.605649	-1.36502	-0.145342	-0.966651	0.570271	-0.817332	-0.346555	-0.367792	1.00122	0.87607	1.52891	1.42868
12282	TC0300003008.mm.1	---	-0.835268	0.537411	1.26327	0.751556	4.38016	-2.09854	2	0	0	0	-0.741177	-1.43017	-0.163899	0.765846	1.64236	-0.520607	0.276107	-1.01541	-0.197259	-0.691783	-1.17251	-1.45008	-0.361715	-0.134111	-0.34728	0.880572	0.871308	0.449986	1.40768	1.93214
20788	TC0600000360.mm.1	Gm25062	-0.659122	0.665856	1.43789	0.84826	3.80843	-2.09701	3	0	0	0	-0.898807	-1.18932	-1.13968	0.85663	1.29217	0.120225	-0.302557	-0.83654	0.331747	0.133907	-0.514946	-1.33676	-1.2654	-0.184066	-0.155611	-0.106227	0.881558	0.484267	1.72106	2.10834
41434	TC1000002297.mm.1	1700023F02Rik // 1700023F02Rik // 1700023F02Rik	-0.57677	0.666348	1.51761	0.466021	5.68288	-2.09438	5	0	0	0	-0.254797	-0.929916	-0.924847	0.307977	0.369263	0.659137	1.58577	-0.307771	0.800449	-0.694908	-0.924904	-1.10846	-0.0166511	-0.563275	-1.05299	-1.39717	-0.0997436	0.998006	1.89859	1.65624
53608	TC1400001630.mm.1	Gm23633	-0.873991	0.4809	1.21489	1.00292	3.44192	-2.08888	2	0	0	0	-0.47234	-0.748357	-1.30809	0.455933	0.797285	1.51492	-1.07683	0.79422	-1.65902	-0.353437	-0.543278	-1.03341	-0.644886	0.157934	0.389258	0.430615	-0.3452	0.313035	2.29498	1.03666
35203	TC0M00000027.mm.1	ND6	-0.680314	0.625904	1.40699	0.60203	4.96444	-2.0873	3	0	0	0	-1.21045	-0.65169	0.637006	0.49567	0.222454	0.825794	0.64762	-0.913303	-0.738869	-0.65022	-1.17158	-0.976396	-0.309348	0.65011	-1.76346	0.913856	-0.228148	0.76757	1.49047	1.96292
17239	TC0500000519.mm.1	---	-0.781571	0.393948	1.30306	0.755887	4.52086	-2.08463	2	0	0	0	-0.457579	-0.677986	-1.41432	0.788204	0.943789	0.787274	0.713812	-0.744209	-0.905459	-0.550857	-0.31907	-1.14573	-1.51165	-0.344949	-0.694778	0.533747	1.09058	0.481985	1.4572	1.97
32341	TC0900000489.mm.1	---	-0.628594	0.31422	1.45412	0.563068	6.01764	-2.08272	2	0	0	0	-0.215717	-0.287995	-0.498757	-0.35123	0.138248	0.00578612	-0.2339	2.0674	-0.881211	-0.595042	-0.918784	-1.00265	-1.19487	0.126385	-1.49992	0.588084	0.391795	1.3295	0.963808	2.06906
62527	TC1800000425.mm.1	Gm23425	-0.740623	0.518833	1.32638	0.719144	4.50153	-2.06701	2	0	0	0	-0.978501	-0.979536	-1.25706	1.32206	1.19717	0.40255	-0.418791	-1.03741	-0.28597	0.0869351	-0.49689	-1.27333	-1.06451	-0.283772	0.87393	-0.45779	0.671765	0.52785	1.52836	1.92295
9972	TC0300000667.mm.1	Mir466k	-0.709411	0.365035	1.3499	0.864139	3.9783	-2.05932	2	0	0	0	-1.30982	-0.32281	-0.627479	0.69911	1.10585	0.802979	0.0667953	0.101565	-0.433381	-0.751702	-0.444378	-1.07631	-1.15527	0.0861556	-1.81	0.186299	0.832684	0.428686	2.14256	1.47847
3301	TC0100003343.mm.1	Gm26472	-0.613259	0.6841	1.44214	0.786091	3.935	-2.0554	3	0	0	0	-0.469927	-1.58545	-0.456524	0.911911	0.957584	-0.561753	-0.0925659	-0.186175	0.41936	-0.43696	-0.344887	-1.41842	-1.34692	-0.0865456	0.349629	-0.997545	1.01877	0.624914	1.50863	2.19287
48093	TC1200001476.mm.1	Gm23913	-0.636819	0.48015	1.41684	1.04164	3.26924	-2.05366	2	0	0	0	-1.04648	-0.819978	-0.910991	0.985853	1.16585	0.847854	-0.682069	-1.06988	-0.217682	0.192278	-0.535055	-1.11982	-0.952802	-0.394388	0.524566	-0.639693	0.421914	0.28607	1.62723	2.33724
58632	TC1600001488.mm.1	---	-0.692114	0.760305	1.35231	0.397429	5.55949	-2.04443	7	0	0	0	-0.138193	-0.938014	0.727233	1.31868	0.484076	0.271288	0.356732	0.476297	-1.00526	-1.60982	-0.833076	-1.04766	-1.12555	0.196146	0.473475	-1.56053	-0.102758	1.13111	1.81113	1.11471
41017	TC1000001878.mm.1	---	-0.599466	0.550775	1.44486	0.477992	5.91391	-2.04432	4	0	0	0	-0.697987	-1.28792	-0.916432	0.232061	0.518772	0.825498	-0.661889	0.71952	0.449981	-0.605481	-0.311553	-0.826876	-1.18198	0.53154	-1.19552	-1.16165	1.23533	1.19469	1.99601	1.14387
33373	TC0900001532.mm.1	Mir467h	-0.809478	0.375074	1.23293	0.766512	4.39514	-2.04241	2	0	0	0	-0.70846	-0.308909	-0.531567	0.891314	0.888635	1.58611	0.622955	-0.0635837	-0.750749	-1.3814	-0.759778	-1.22549	-1.19907	0.104323	-1.19252	-0.291778	0.621164	0.368496	1.82978	1.50052
22981	TC0600002573.mm.1	Gm25738	-0.820856	0.450199	1.2053	0.866395	3.83479	-2.02616	2	0	0	0	-0.676225	-1.16601	-1.52321	1.07354	1.05817	1.58748	0.172417	-0.525468	-0.894513	-0.332665	-0.245223	-0.908148	-1.10218	0.0575902	-0.777537	0.0530554	0.533	0.240925	1.45701	1.91797
27400	TC0700003416.mm.1	Gm25249	-0.698285	0.527187	1.32545	0.725452	4.36317	-2.02373	2	0	0	0	-0.538698	-0.783915	0.280521	1.06631	1.00403	-0.653587	0.380218	0.308176	-0.560359	-1.11088	-0.783419	-1.39124	-1.16909	-0.289961	0.784781	-1.39604	0.876807	0.520042	1.52872	1.92758
39697	TC1000000546.mm.1	Gm23488	-0.640375	0.552604	1.37873	0.694864	4.46415	-2.01911	3	0	0	0	-0.505257	-1.27265	-0.786886	0.973773	1.0831	-0.692944	-0.854893	-0.840391	-0.142158	0.202483	-0.680113	-1.29804	-1.15994	-0.320596	0.109439	0.899798	1.14907	0.779966	1.21558	2.14066
18547	TC0500001837.mm.1	---	-0.787026	0.727178	1.23157	0.525605	4.93034	-2.0186	5	0	0	0	-0.813066	-1.03994	-1.64036	1.07817	1.18036	-0.545751	-0.291142	0.00513917	-0.259556	0.395589	-0.558152	-1.5937	-1.26109	-0.318454	0.929887	0.0969182	0.940424	0.650533	1.67393	1.37025
34775	TC0900002942.mm.1	Pccb // Pccb // Pccb // Pccb // Pccb // Pccb // Pccb // Pccb // Pccb // Pccb // Pccb // Pccb // Pccb // Pccb // Pccb // Pccb	-0.513588	0.444908	1.50423	0.722248	4.48783	-2.01782	2	0	0	0	-0.454866	-0.115762	-0.488442	0.400431	0.973726	0.728391	0.629818	0.994708	-0.218554	-0.153415	-1.36688	-0.797194	-0.461974	-0.457916	-1.36373	-1.32055	-1.04049	0.79873	1.47183	2.24214
56384	TC1500001569.mm.1	Gm23475	-0.601798	0.602543	1.41555	0.683053	4.42987	-2.01735	3	0	0	0	-0.164852	-1.76388	-0.788795	0.70324	0.585539	0.930747	-1.05155	-0.940322	-0.653755	-0.221601	0.0671796	-0.686883	0.246839	-1.5944	0.365872	0.931096	-0.211122	0.841403	2.17095	1.2343
37661	TC0X00002497.mm.1	Mir669m-2	-0.84036	0.531576	1.17563	0.66734	4.63949	-2.01599	3	0	0	0	-0.997683	-0.826723	-0.17818	0.963164	0.956855	1.63221	0.150457	0.293845	-0.88538	-1.62567	-0.153096	-1.21578	-0.895575	0.12821	-1.14103	-0.391404	0.658883	0.415433	1.44657	1.6649
35206	TC0M00000030.mm.1	---	-0.615295	0.892625	1.39834	0.32978	5.19785	-2.01364	7	0	0	0	-1.1451	-1.58498	1.12944	1.20914	0.958511	-0.752413	0.338734	0.208915	-0.731526	-0.594761	-1.18529	-0.194852	0.365221	0.221332	-0.462022	-1.11696	-0.858429	1.57777	1.01775	1.59951
36321	TC0X00001133.mm.1	Gm23029	-0.67189	0.600232	1.34151	0.743695	4.14601	-2.0134	3	0	0	0	-0.960577	-1.10484	-1.27235	1.08441	1.10218	0.724808	-0.19498	-1.63219	0.315202	-0.103837	-0.467368	-1.10945	-0.985853	-0.117508	0.220853	-0.212487	0.689484	0.483608	1.80347	1.73744
4027	TC0200000186.mm.1	Gm24342	-0.807797	0.477505	1.20486	0.395334	6.91681	-2.01265	4	0	0	0	-1.10929	-0.429056	-0.807726	1.17444	1.12094	-0.721184	-0.687987	0.674472	-0.601861	-1.05704	-0.107651	-1.54195	-1.55213	-0.287024	0.763393	0.657084	0.898009	0.753817	1.36945	1.4913
19678	TC0500002983.mm.1	Gm15787 // Gm15787 // Gm15787 // Gm15787 // Gm15787 // Gm15787	-1.04334	0.641039	0.964602	0.5956	4.77337	-2.00794	4	0	0	0	-0.314527	-1.59262	-0.65958	0.163992	0.912074	0.610953	0.462332	0.65979	-1.88095	-1.15773	-0.259405	-1.43858	0.798105	-1.15245	0.237116	0.724722	0.992953	0.28142	1.37465	1.23774
2613	TC0100002643.mm.1	---	-0.554079	0.460671	1.45222	0.844359	3.87577	-2.0063	2	0	0	0	-0.593233	-0.291559	-0.196768	1.05466	0.650034	-0.470797	-0.925626	0.644755	0.142811	-1.15012	-0.862997	-0.926695	-1.2963	-1.11261	0.173528	1.27508	-0.470831	0.494211	1.77438	2.08808
62278	TC1800000172.mm.1	---	-0.727133	0.549525	1.27897	0.892159	3.61208	-2.00611	2	0	0	0	-0.898762	-1.10536	-1.27726	0.913778	1.04871	-0.48577	0.0145051	-0.0497611	0.0197299	-0.0498903	-0.523321	-1.25507	-1.01022	-0.288186	1.23736	-1.10574	0.978324	0.314659	1.44725	2.07501
21901	TC0600001485.mm.1	---	-0.799048	0.849925	1.20577	0.361376	5.23384	-2.00482	7	0	0	0	-1.92977	-0.889938	-0.0709865	0.556617	-0.0424701	1.48873	-0.912212	1.29105	-1.45029	-1.27872	0.534597	-0.508236	0.344464	-0.159924	-0.511054	0.223232	-0.302416	0.793539	1.35585	1.46792
49091	TC1200002494.mm.1	Gm23190	-0.861429	0.564593	1.14236	0.792589	3.96858	-2.00379	2	0	0	0	-1.17217	-0.413196	-1.29884	0.902879	1.27758	0.116507	0.964623	0.522802	-0.604032	-1.71083	-0.0702847	-0.760657	-0.917483	-0.475957	-0.484378	-0.521154	1.21751	0.311292	1.88985	1.22594
7401	TC0200003589.mm.1	Gm23842	-0.626506	0.644506	1.37429	0.947724	3.34053	-2.00079	2	0	0	0	-0.706513	-1.21696	-1.38793	1.14231	1.01078	0.498911	-1.06434	-0.543454	-0.0137564	0.279445	-0.247096	-1.09273	-1.14694	-0.405194	0.120209	-0.217262	0.867669	0.33138	1.60861	2.18286
50115	TC1300000868.mm.1	Mir466f-4	-0.643069	0.518962	1.35507	0.64439	4.75091	-1.99814	3	0	0	0	-0.828352	-0.730948	-1.14394	1.08957	1.2439	0.236719	-0.499652	0.423812	-0.872124	0.4327	-0.444232	-0.914593	-0.95369	0.0674679	-1.92044	0.219193	0.529411	0.677604	1.9603	1.4273
30673	TC0800002058.mm.1	Gm22030	-0.848619	0.740324	1.14932	0.766149	3.81715	-1.99794	3	0	0	0	-2.29969	-0.0962686	-0.643209	0.850738	0.944165	0.0930817	0.556961	-0.747846	-1.10618	-0.864171	-0.138015	-0.792803	-0.488781	0.0324989	-0.500372	0.163453	1.58848	0.382518	1.91481	1.15062
35020	TC0900003188.mm.1	Gm22243	-0.901564	0.4216	1.09294	0.698793	4.598	-1.99451	2	0	0	0	-0.746886	-0.682847	-1.51446	1.25188	1.38319	0.954918	0.840155	0.0733039	-0.654075	-1.22475	-0.294687	-1.19324	-1.20505	-0.327497	-0.180742	-0.571387	0.813342	0.364878	1.75823	1.15572
47199	TC1200000575.mm.1	---	-0.565322	0.656893	1.41829	0.408121	5.79504	-1.98361	6	0	0	0	-0.464577	-0.900247	0.569447	-0.261579	1.17298	-0.0178417	0.28789	0.536145	-0.749731	-1.06369	-1.33488	-0.0135703	-1.14324	-0.0691684	-1.23778	-1.01796	1.45294	1.10884	1.88082	1.2652
51286	TC1300002044.mm.1	---	-0.872212	0.846674	1.11065	0.400597	5.0219	-1.98286	7	0	0	0	-0.660258	-0.264188	0.573663	1.27089	0.843437	0.123906	0.359898	0.675282	-1.95434	-1.27869	-0.98004	-1.54163	-0.746761	-0.578488	1.19562	-0.0542479	-0.315989	1.45944	1.19938	0.673125
14253	TC0400001740.mm.1	---	-0.716211	0.457942	1.26458	0.467774	6.17503	-1.98079	3	0	0	0	-0.46183	-0.265787	-0.682831	0.0147625	1.0137	-0.560216	-1.41158	0.526337	-0.131982	-1.15648	-0.976578	-1.33799	-1.12821	0.251803	0.0999708	1.93001	0.483162	0.742761	1.40469	1.64628
9487	TC0300000177.mm.1	Mir466q	-1.02308	0.506799	0.957236	0.625314	4.84547	-1.98032	3	0	0	0	-0.69806	-0.203499	-1.10175	0.774062	1.07432	1.39817	0.814425	-0.734767	-1.81932	-0.929201	-1.04896	-1.36078	-0.740964	0.129509	0.0980296	0.630256	0.84683	0.242672	1.2247	1.40433
35196	TC0M00000020.mm.1	mt-Tq	-0.625319	0.454582	1.35397	1.27511	2.61822	-1.97929	2	0	0	0	-0.517849	-0.624654	0.016017	1.56456	1.13591	0.263048	-0.106104	-0.246505	-0.420677	-0.78926	-1.48735	-0.553466	-1.11586	-0.380436	-0.770493	0.437343	-0.466143	2.25501	-0.10501	1.91191
34078	TC0900002241.mm.1	Zbtb16 // Zbtb16 // Zbtb16 // Zbtb16 // Zbtb16 // Zbtb16 // Zbtb16	-0.688142	0.737842	1.28598	0.74044	3.86768	-1.97412	3	0	0	0	-0.335888	-1.1025	-0.511087	-0.0458101	0.167949	-0.399519	0.0213238	0.320606	0.28734	-0.0727212	-1.81862	-1.26352	-0.463195	2.34568	-0.198971	-0.40546	-0.38355	0.450274	1.54748	1.86019
3006	TC0100003043.mm.1	---	-0.687854	0.642617	1.28476	1.12401	2.84685	-1.97261	2	0	0	0	-0.557296	-0.559001	-0.342517	-0.686326	0.688667	0.187473	0.233472	1.59865	-1.99792	-0.30018	-0.0774642	-0.980606	-0.492797	-0.739328	-0.584592	0.979594	-0.224104	-0.0131023	1.94181	1.92556
58623	TC1600001479.mm.1	Apod // Apod // Apod // Apod // Apod // Apod // Apod // Apod // Apod // Apod // Apod // Apod // Apod // Apod // Apod // Apod	-0.211277	0.353717	1.75979	1.22254	2.74374	-1.97106	2	0	0	0	-0.518121	-0.515994	-0.155721	0.197848	0.0456095	-0.566427	0.159765	0.182444	-0.2022	-0.27618	0.524255	-0.334977	-1.1016	-1.31599	0.129571	-0.0238248	-1.50782	1.02404	1.08429	3.17103
63120	TC1800001022.mm.1	Gm25567	-0.545956	0.7813	1.42494	0.635215	4.18578	-1.97089	4	0	0	0	0.108108	-0.1391	-1.72628	0.590917	1.21588	0.43598	-0.996323	-0.130495	0.579313	-0.70122	-1.08076	-0.861747	-1.35053	-0.578931	-0.676164	0.225198	0.81135	0.758939	2.02408	1.49179
28090	TC0700004114.mm.1	Gm25787	-0.865789	0.351582	1.0965	0.723758	4.47518	-1.96229	2	0	0	0	-1.2138	-0.801976	-1.26832	1.24962	1.09986	1.35349	1.00975	-0.507589	-0.689774	-0.43831	-0.479744	-1.1686	-0.927279	0.221845	-1.01188	-0.359965	0.643149	0.261422	1.54245	1.48563
44104	TC1100001757.mm.1	Gm23990	-0.89473	0.42736	1.06721	0.311777	8.11211	-1.96194	5	0	0	0	-0.278583	-0.566027	-0.792156	1.45906	0.953295	0.174738	1.5266	0.500955	-0.927705	-1.38098	-0.826721	-1.49094	-1.56013	-0.0652991	-0.180713	-0.391504	0.644486	0.91271	0.862846	1.42606
22323	TC0600001909.mm.1	Gm26233	-0.61942	0.77138	1.33961	0.7503	3.75177	-1.95903	3	0	0	0	0.395573	-0.038585	-0.676292	0.128985	0.100904	1.14061	-0.0294184	1.03446	-0.421581	-1.97925	-0.461473	-1.15433	-1.49374	0.259514	-0.384738	-1.02363	0.584146	0.536547	2.02268	1.45961
51378	TC1300002136.mm.1	Gm25000	-0.981182	0.488607	0.976888	0.562953	5.23795	-1.95807	3	0	0	0	-1.15235	-1.18207	-1.32951	0.930942	0.97601	1.79264	0.488329	-0.876821	-0.89732	-1.28893	0.0799658	-1.09806	-0.235861	0.485553	-0.217228	-0.326151	0.9202	0.328872	1.34531	1.25648
48421	TC1200001808.mm.1	---	-0.775461	0.75874	1.18179	0.085825	6.72534	-1.95725	6	0	0	0	0.293925	-0.0704346	-1.2435	-0.651282	0.0584704	2.18352	-0.0538598	0.12119	-0.935705	-0.497753	-1.97623	-0.998527	0.065544	0.395706	0.670115	0.216854	-1.12339	1.23592	1.08283	1.22662
1603	TC0100001622.mm.1	Crp // Crp // Crp // Crp // Crp	-0.9242	0.537653	1.03277	0.548698	5.19963	-1.95697	3	0	0	0	-1.1621	-0.133157	-1.19889	1.34988	-0.489052	0.215003	1.22232	-0.109222	-1.24555	-0.180597	-1.4681	-1.08101	0.947588	-0.267936	1.29317	-1.07225	0.281593	0.464394	1.55941	1.07451
35177	TC0M00000001.mm.1	mt-Tf	-0.798728	0.435497	1.15421	0.20207	9.67981	-1.95294	7	0	0	0	-0.066496	-0.669434	-0.825536	1.9986	1.27519	-0.0491439	0.869517	-0.383782	-0.995912	-0.492111	-1.21723	-1.32438	-0.517497	-0.948662	-0.780459	-0.297702	0.962393	0.963432	1.13327	1.36594
44665	TC1100002325.mm.1	Mir1933 // Mir1933 // Mir1933	-0.755365	0.386706	1.19303	0.936757	3.47779	-1.94839	2	0	0	0	-1.02539	-1.45407	-0.54434	1.01804	1.59463	-1.05708	-0.352384	0.319413	-0.679368	-0.452774	-0.813198	-0.31841	0.300406	-0.442534	1.4033	-0.133066	-0.942248	0.547815	2.26749	0.76378
52389	TC1400000386.mm.1	Mir346 // Mir346 // Mir346	-0.807592	0.736251	1.13678	0.745416	3.79393	-1.94437	3	0	0	0	-2.00608	-0.880033	-1.07099	0.471095	1.10226	-0.547247	0.816761	0.226955	0.105476	-1.03869	0.11408	-0.876905	-0.0884912	0.450306	-1.14494	1.41627	-0.460175	0.281498	1.48069	1.64816
21434	TC0600001014.mm.1	Gm23401	-0.802816	0.31468	1.13031	0.835607	3.8905	-1.93312	2	0	0	0	-0.840263	-1.12265	-0.888312	1.04667	1.29614	0.612343	0.402414	-1.31564	-0.501853	-0.454446	-0.552638	-1.25955	-1.12124	-0.330501	0.742992	-0.359104	1.25472	0.248664	1.23162	1.91064
10524	TC0300001228.mm.1	---	-0.533188	0.626186	1.39966	0.487517	5.25589	-1.93285	4	0	0	0	-0.301345	0.0403156	-0.543035	0.122759	1.51396	-0.0272282	0.390426	-0.661026	0.376888	-1.33074	-0.771196	-1.20321	-1.34617	-0.283326	-1.5835	0.796497	0.610942	0.846402	1.58628	1.7663
3719	TC0100003767.mm.1	---	-0.585208	0.555862	1.34626	0.824393	3.71243	-1.93147	2	0	0	0	-1.51966	-0.594812	0.0869645	-0.203351	0.69417	-0.996626	-0.30539	1.07934	-1.00913	-0.706998	-0.175001	-0.177817	-0.0298363	-0.733276	0.431499	-1.43032	1.55146	1.03	2.28196	0.726826
11015	TC0300001724.mm.1	---	-0.585208	0.555862	1.34626	0.824393	3.71243	-1.93147	2	0	0	0	-1.51966	-0.594812	0.0869645	-0.203351	0.69417	-0.996626	-0.30539	1.07934	-1.00913	-0.706998	-0.175001	-0.177817	-0.0298363	-0.733276	0.431499	-1.43032	1.55146	1.03	2.28196	0.726826
55979	TC1500001156.mm.1	---	-0.585208	0.555862	1.34626	0.824393	3.71243	-1.93147	2	0	0	0	-1.51966	-0.594812	0.0869645	-0.203351	0.69417	-0.996626	-0.30539	1.07934	-1.00913	-0.706998	-0.175001	-0.177817	-0.0298363	-0.733276	0.431499	-1.43032	1.55146	1.03	2.28196	0.726826
56366	TC1500001550.mm.1	---	-0.585208	0.555862	1.34626	0.824393	3.71243	-1.93147	2	0	0	0	-1.51966	-0.594812	0.0869645	-0.203351	0.69417	-0.996626	-0.30539	1.07934	-1.00913	-0.706998	-0.175001	-0.177817	-0.0298363	-0.733276	0.431499	-1.43032	1.55146	1.03	2.28196	0.726826
47020	TC1200000394.mm.1	---	-0.957325	0.742327	0.97276	0.652809	4.10773	-1.93008	4	0	0	0	-1.10072	-2.04149	-0.974891	0.307353	1.22122	1.47217	0.296649	0.345685	-1.5183	0.229915	-0.959563	-0.336223	0.12075	0.976105	-0.0412462	-0.11262	-0.803072	0.249554	1.15027	1.51845
3940	TC0200000099.mm.1	Mir669d-2	-0.64002	0.627764	1.28711	0.506297	5.11867	-1.92713	4	0	0	0	-0.168723	-0.905317	-0.475802	1.29347	1.02096	0.0360625	-1.03813	-0.174876	-0.861875	0.213786	-0.522768	-1.75944	-1.86089	-0.262513	0.528692	0.35072	0.725337	0.707384	1.51155	1.64239
54040	TC1400002064.mm.1	Mir6948	-0.74267	0.993386	1.18055	0.581759	3.81763	-1.92322	6	0	0	0	-2.10936	-1.19235	-0.326553	0.301578	0.985699	0.788152	0.872689	0.24406	-1.02746	-1.19195	1.07183	-0.422835	0.152073	0.104892	-0.0878879	-0.427118	-1.27711	0.542124	1.68073	1.3188
39159	TC1000000004.mm.1	Gm24482	-0.71762	0.631162	1.20528	0.477085	5.27705	-1.9229	5	0	0	0	-1.44017	-0.976579	-0.994741	0.905428	1.68884	-1.38489	-0.123894	0.238048	-0.582729	0.415094	-0.262227	-1.18199	-0.861865	-0.236641	0.358067	-0.382419	1.20684	0.732672	1.68672	1.19644
62366	TC1800000262.mm.1	---	-0.79131	0.716187	1.12807	0.474467	4.9839	-1.91938	5	0	0	0	-0.0993253	-0.718329	-0.738986	0.25164	-0.331022	0.321738	0.431857	-0.926212	-1.87894	-1.35588	0.234597	-0.982314	-0.795366	0.15271	2.05592	-0.0389533	1.03265	0.838289	1.67563	0.870295
43963	TC1100001615.mm.1	Gm11553	-0.50888	0.618224	1.40838	0.6795	4.19877	-1.91726	3	0	0	0	-0.391941	-0.623069	0.368632	0.979594	0.0619058	-1.28315	0.356635	-0.569129	-1.20191	0.0745821	-0.459046	-1.3294	-1.65747	0.0554747	1.39478	0.362006	-0.363647	0.951714	1.08417	2.18927
56483	TC1500001669.mm.1	Gm24834	-0.846355	0.51199	1.0664	0.560082	5.07571	-1.91275	3	0	0	0	-0.870067	-1.01944	-0.429385	1.14909	1.44865	-0.0473554	0.912413	0.921097	-0.202504	-1.74382	-0.557721	-1.10155	-0.901706	-0.195348	-0.841328	-0.774887	1.05466	0.419682	1.39293	1.38658
5383	TC0200001552.mm.1	Cd59a // Cd59a // Cd59a // Cd59a // Cd59a // Cd59a // Cd59a // Cd59a // Cd59a // Cd59a // Cd59a // Cd59a // Cd59a	-0.770916	0.711221	1.14108	0.640361	4.1828	-1.912	4	0	0	0	-1.50439	-1.07267	-1.12675	0.77502	1.27333	1.04141	-0.496066	0.128024	0.529481	-0.365551	-1.36098	-0.495552	0.863165	0.154179	-0.856905	0.43802	-1.34702	0.407814	1.59017	1.42527
28981	TC0800000349.mm.1	4933416M07Rik // 4933416M07Rik // 4933416M07Rik	-0.407077	0.31554	1.50017	0.812258	3.94154	-1.90725	2	0	0	0	-0.349212	-0.622748	-0.127756	0.0716438	0.551137	-0.0514763	-1.04271	1.30574	-0.381229	-0.114337	-0.248779	-1.00548	-1.55642	-0.606696	-1.09623	1.32935	-0.555322	0.566334	1.89148	2.04271
33162	TC0900001317.mm.1	Gm23391	-0.744731	0.612793	1.15759	0.733566	3.94083	-1.90232	3	0	0	0	-1.48407	-0.704172	-1.18512	1.04228	0.97315	-0.093457	-0.495884	0.47953	-0.933167	0.109893	-1.07088	0.0544038	-0.494368	-0.474822	-0.937913	-0.220814	1.96266	0.689507	2.00301	0.780239
62181	TC1800000075.mm.1	---	-0.747976	0.751409	1.15367	0.45953	4.89295	-1.90164	6	0	0	0	-0.126537	-0.699254	0.390635	0.803726	0.373094	-0.165058	-0.756236	-0.810738	-0.54047	-1.72337	-0.97987	-1.55696	-0.741671	-0.158315	0.406966	1.9183	0.904767	0.739432	1.64797	1.0736
6483	TC0200002664.mm.1	Gm14275 // RP23-160O12.1	-0.89821	0.924863	1.00049	0.751175	3.4086	-1.8987	4	0	0	0	-2.44749	-0.629024	-0.607074	0.679364	1.09869	0.118316	1.05823	0.738777	-0.0791191	-1.89919	0.0161709	-0.641743	-0.217504	0.313571	-0.196174	-0.658229	0.350972	0.622009	0.513833	1.86562
17007	TC0500000286.mm.1	Hadhb // Hadhb // Hadhb // Hadhb // Hadhb // Hadhb // Hadhb // Hadhb // Hadhb // Hadhb // Hadhb // Hadhb // Hadhb // Hadhb // Hadhb // Hadhb // Hadhb // Hadhb // Hadhb // Hadhb // Hadhb // Hadhb // Hadhb	-0.708052	0.719137	1.18736	0.742736	3.73329	-1.89541	3	0	0	0	-1.72659	-1.18554	-0.405465	1.48571	0.990195	0.431461	-0.405266	-0.435094	0.323125	-0.289714	-1.32335	-0.348826	0.479856	0.774748	-0.0473172	-0.33694	-1.54308	1.43401	0.352679	1.7754
56385	TC1500001570.mm.1	Fbxo32 // Fbxo32 // Fbxo32 // Fbxo32 // Fbxo32	-0.597665	0.399305	1.29625	1.02906	3.08961	-1.89392	2	0	0	0	-1.42232	-0.664638	-0.379065	1.30075	1.37624	-0.216544	0.617617	0.255506	-0.32678	-0.478581	-0.676044	-0.236225	-1.5116	0.195569	-0.309107	-0.0408831	-1.37266	1.72118	0.122784	2.0448
10933	TC0300001639.mm.1	Fabp4 // Fabp4 // Fabp4 // Fabp4 // Fabp4 // Fabp4	-0.377707	0.319612	1.51071	0.721494	4.35401	-1.88841	2	0	0	0	-0.332106	-0.758334	-0.271694	0.213332	-0.212994	-1.38938	-0.095048	0.00296008	0.143865	-0.340952	-0.794459	-0.290269	1.87884	-1.27074	0.591863	-0.218687	-1.38832	0.690052	1.79674	2.04533
48894	TC1200002289.mm.1	Serpina3c // Serpina3c // Serpina3c // Serpina3c // Serpina3c // Serpina3c	-0.37492	0.814604	1.51327	0.707948	3.68987	-1.88819	4	0	0	0	-0.307914	-0.164267	0.651938	-0.24587	-0.675909	-0.706333	0.436854	0.47321	-0.00984022	0.11382	-1.75142	-1.15676	0.0274004	1.03621	-1.82135	0.128643	-0.568222	1.02218	1.19285	2.32478
9613	TC0300000304.mm.1	Gm23810	-0.82341	0.428926	1.06203	0.694753	4.35799	-1.88544	2	0	0	0	-1.34241	-0.522489	-0.794217	0.863336	0.984179	1.18898	1.22672	-1.5824	-0.660826	-0.839496	-0.204089	-1.40034	-0.570182	0.173446	-0.722199	0.139301	0.876597	0.259834	1.46986	1.45639
9324	TC0300000012.mm.1	Gm23937	-0.790057	0.413973	1.09042	0.958514	3.26986	-1.88047	2	0	0	0	-0.583158	-0.754456	-1.6393	1.23061	0.986272	1.46235	0.442723	-0.803236	-0.674868	-0.347166	-0.603939	-0.92751	-1.11674	-0.373202	-0.40194	-0.23068	1.06299	-0.0141868	1.58241	1.70303
10143	TC0300000840.mm.1	---	-0.541653	0.500206	1.33723	0.870165	3.50025	-1.87888	2	0	0	0	-0.67943	-1.01666	-0.639477	1.1276	1.57547	-1.09515	0.456924	-0.47457	0.25727	0.00525274	-0.626973	-1.09155	-1.23085	-0.414035	-0.0690959	-0.909414	0.812994	0.347405	1.9817	1.68259
35383	TC0X00000178.mm.1	Gm22464	-0.79916	0.973841	1.07465	0.601153	3.70387	-1.87381	6	0	0	0	-2.56955	-0.895028	-0.677905	0.696439	0.519788	-0.0997163	0.11044	0.399686	-1.10325	-0.907382	0.504018	0.0549788	0.560909	0.35944	-0.779592	-0.8125	1.41526	0.634	1.75947	0.830489
3510	TC0100003554.mm.1	Gm22950	-0.608679	0.321078	1.26471	1.08582	2.93389	-1.87339	2	0	0	0	-0.604436	-0.230447	-0.82946	1.0286	0.30063	-0.0773758	-1.00981	-1.09295	-0.226243	-0.681466	-1.13078	-0.557914	-0.699468	0.276155	0.830854	-0.885359	1.79532	0.388087	2.47933	0.926728
52510	TC1400000507.mm.1	Samd4 // Samd4 // Samd4 // Samd4 // Samd4 // Samd4 // Samd4 // Samd4 // Samd4 // Samd4 // Samd4 // Samd4 // Samd4 // Samd4 // Samd4 // Samd4 // Samd4 // Samd4 // Samd4 // Samd4 // Samd4 // Samd4 // Samd4 // Samd4 // Samd4 // Samd4 // Samd4 // Samd4	-0.481165	0.685372	1.39198	0.786472	3.58315	-1.87315	3	0	0	0	-1.64887	-0.280725	-0.303278	0.645971	0.322718	0.017022	1.57582	0.276117	-0.169442	-0.363694	0.47585	-1.078	-0.9388	0.214557	-0.340255	-1.45798	-1.12295	1.18529	0.729497	2.26116
59174	TC1600002033.mm.1	Krtap6-2 // Krtap6-2 // Krtap6-2 // Krtap6-2 // Krtap6-2	-0.83096	0.500287	1.03937	0.509087	5.35156	-1.87033	3	0	0	0	-0.662164	-0.306673	-0.357737	1.00366	-1.54678	-0.975637	1.06767	1.56214	-1.14806	-1.26759	-0.490388	-1.5841	0.454654	0.786309	0.384675	-0.0202771	-0.017799	0.872734	1.61089	0.634482
48234	TC1200001620.mm.1	---	-0.532377	0.714434	1.33217	0.576593	4.34986	-1.86454	4	0	0	0	-0.175274	-0.0436697	0.345434	0.159765	-0.0336526	-0.0792197	-1.17945	-1.21586	-0.468305	-0.485078	-1.79312	-1.10662	-0.820754	0.0502449	1.3595	1.5899	-0.100337	0.72371	1.40231	1.87048
64246	TC1900000402.mm.1	Kank1 // Kank1 // Kank1 // Kank1 // Kank1 // Kank1 // Kank1 // Kank1 // Kank1 // Kank1 // Kank1 // Kank1 // Kank1 // Kank1	-0.625901	0.845966	1.23671	0.52581	4.22454	-1.86261	6	0	0	0	-0.956437	-0.324969	-0.0287434	1.49118	0.938013	-1.38233	-0.193745	0.152588	0.268295	-0.0850062	-2.19295	-1.0615	-0.504558	0.36701	0.14196	0.630659	-0.969611	0.738117	1.18597	1.78606
35187	TC0M00000011.mm.1	ND3	-0.50547	0.795803	1.35241	0.313283	5.29341	-1.85788	7	0	0	0	-1.92798	-1.22429	-0.29137	1.38357	1.4195	-0.570987	0.402411	-0.806659	0.0083728	-0.2545	-0.249156	0.400633	-0.526214	0.558204	-0.681363	-0.559679	-1.13773	1.17393	1.16916	1.71415
24814	TC0700000807.mm.1	5430431A17Rik	-0.382095	0.36407	1.47545	0.994475	3.14615	-1.85755	2	0	0	0	-0.156862	-0.64382	-0.369168	0.127748	1.63112	-0.341291	-0.31917	0.82506	0.119852	-0.0680116	-0.703202	-0.853451	-1.66884	-0.655776	-0.256277	-1.32768	0.233405	2.58179	1.18875	0.655829
46158	TC1100003825.mm.1	---	-0.595517	0.908125	1.26056	0.321473	4.75665	-1.85608	7	0	0	0	-0.670732	-0.986529	-1.61292	0.625996	1.05923	-0.680961	-0.769226	0.276366	0.425743	0.00474747	0.41759	-1.74652	-1.27519	-0.805801	0.147294	0.99477	0.814464	0.890847	1.4166	1.47423
30176	TC0800001556.mm.1	Gm22197	-0.781163	0.613725	1.0737	0.595446	4.47256	-1.85486	3	0	0	0	-1.4111	-0.90201	-0.903399	0.241882	1.38597	1.68567	0.10202	-0.466087	-0.657773	-0.134589	0.105527	-1.5648	-0.581209	-0.407921	-1.08498	0.124494	1.24719	0.386473	1.43582	1.39881
57586	TC1600000431.mm.1	---	-0.614613	0.748367	1.23817	0.417268	4.98671	-1.85278	6	0	0	0	-1.4077	-1.53123	0.526612	0.763094	0.99189	-0.502559	-1.51722	1.51997	-0.827805	-0.777827	0.0452555	-0.329595	0.230107	0.0485432	0.398343	-1.17187	-0.17251	0.928806	1.07296	1.71275
65526	TC1900001691.mm.1	Gpam // Gpam // Gpam // Gpam // Gpam // Gpam // Gpam // Gpam	-0.539371	0.704421	1.31171	0.906619	3.15207	-1.85108	3	0	0	0	-1.16778	-1.2388	0.401906	0.468283	1.07335	0.146045	-1.37548	0.361684	0.105583	-0.412337	-1.32402	-0.140154	0.00657507	0.819518	-0.214166	0.278119	-1.72346	1.5385	0.313227	2.0834
40165	TC1000001019.mm.1	---	-0.814763	0.496989	1.02892	0.684414	4.21391	-1.84368	2	0	0	0	-0.838667	-1.57271	-1.20532	1.7203	0.983144	1.39875	-0.394432	0.436756	-0.46715	-0.186085	-0.385719	-1.04769	-0.62722	-0.621135	-1.12746	0.179396	0.668482	0.562897	1.81469	0.709171
53726	TC1400001749.mm.1	---	-0.626402	0.504293	1.21695	0.484615	5.44488	-1.84335	3	0	0	0	-0.979502	-0.839692	-0.581345	1.40154	0.977744	0.898194	0.0577799	-0.817147	0.224153	-0.217954	-0.685951	-1.30452	-0.886715	-0.489349	0.364697	-1.79341	1.02065	0.668461	1.39514	1.58724
14761	TC0400002252.mm.1	Gm22690	-0.801522	0.542817	1.0408	0.582218	4.67822	-1.84232	3	0	0	0	-0.11934	-1.06513	-1.69634	0.892185	1.33862	0.771089	0.670841	-0.501941	-0.512428	-0.412573	-0.604829	-1.20001	-1.44263	0.0164155	0.907879	-1.08301	0.918811	0.368643	1.38824	1.36552
7433	TC0200003621.mm.1	Gm22403	-0.722669	0.449542	1.11762	0.562116	5.02364	-1.84029	3	0	0	0	-0.220115	-0.661083	-1.17056	1.01843	1.33647	1.74062	-0.262516	-0.135197	-0.784196	-0.301619	-0.48028	-1.44082	-1.71001	-0.0872639	-0.205944	-0.641695	0.652933	0.474136	1.51299	1.36573
1939	TC0100001961.mm.1	Mir467e // Mir467e	-0.911927	0.513571	0.927415	0.39595	6.13325	-1.83934	5	0	0	0	-1.28105	-0.88155	-1.50053	1.56719	0.604387	1.09166	0.157252	0.452007	-0.972514	-0.419693	-0.0598899	-1.26826	0.550937	-1.40484	1.1566	-0.870355	0.296399	0.505369	1.2907	0.986177
8447	TC0200004643.mm.1	---	-0.484149	0.500714	1.35094	1.22766	2.50141	-1.83509	2	0	0	0	-0.360117	-0.971085	-0.000425	1.01262	0.792795	0.23896	-0.626925	1.48391	-0.161406	-0.109202	-1.36142	-0.425387	-1.21121	-0.488243	-0.790652	-0.262697	-0.812332	0.855811	0.448165	2.74885
3937	TC0200000096.mm.1	Mir669d	-0.575287	0.732712	1.25977	0.617373	4.06543	-1.83506	4	0	0	0	-0.687191	-0.707587	0.906967	0.743754	1.04864	0.927845	0.229464	-1.16856	-1.03288	-0.660878	-0.40505	-1.44039	-1.00305	0.0678375	-1.56496	0.283642	0.683065	0.547026	1.62816	1.60413
16946	TC0500000224.mm.1	---	-0.579109	0.399021	1.252	0.887303	3.42889	-1.83111	2	0	0	0	-0.190606	-0.582521	-0.484355	0.7404	1.18637	0.771345	0.20795	1.01337	-0.0699236	-0.762661	-0.6835	-1.2802	-1.66784	-0.308004	-1.51702	-0.618026	0.489219	0.227478	1.75554	1.77297
46497	TC1100004167.mm.1	Gm25040	-0.73932	0.940956	1.08422	0.755165	3.24098	-1.82354	4	0	0	0	-2.51955	0.138617	-0.225474	0.510667	0.995789	-0.525869	0.882239	0.453523	-1.23064	-0.728745	0.189794	-0.79924	-0.0249062	-0.141015	-0.82802	-0.647313	1.24748	0.574087	1.95174	0.726843
47362	TC1200000739.mm.1	2310002D06Rik // 2310002D06Rik // 2310002D06Rik	-0.638729	0.592634	1.18461	0.374089	5.85978	-1.82333	6	0	0	0	0.0678744	-0.72093	-1.31764	1.44967	0.830876	1.27991	-0.140181	0.96474	-0.548043	0.20153	-1.22185	-0.932042	-1.32125	-0.669455	0.395971	-0.760486	-1.11251	1.24273	0.784858	1.52623
9430	TC0300000119.mm.1	Gm23726	-0.776148	0.938178	1.0467	0.818539	3.08526	-1.82285	4	0	0	0	-2.47986	-0.583779	-1.21091	0.417929	0.487254	0.821833	0.314767	0.00773407	-0.681384	-0.746417	0.626293	-0.356981	0.403047	0.0630483	-1.2248	-0.370732	1.37284	0.437449	1.97712	0.725542
18771	TC0500002062.mm.1	Mir3471-1	-0.701322	1.11811	1.11728	0.567568	3.40075	-1.8186	7	0	0	0	-2.78217	-0.77105	0.214217	0.650618	0.696907	-0.119223	0.141634	-0.382677	-1.21977	-0.47771	0.711306	-0.58408	0.536202	-0.00284292	-1.03778	-0.0262767	1.10086	0.621313	1.73627	0.994254
18849	TC0500002141.mm.1	Gm23801	-0.739701	1.01681	1.07222	0.490752	3.79483	-1.81192	7	0	0	0	-2.41009	-0.775091	-0.824967	0.549044	0.41881	0.0781648	0.20134	0.775128	-0.449519	-1.47036	0.761247	-0.00912686	0.42965	0.123062	-0.91869	-1.03536	1.34009	0.654291	1.61261	0.949769
40794	TC1000001653.mm.1	Gm24485	-0.739701	1.01681	1.07222	0.490752	3.79483	-1.81192	7	0	0	0	-2.41009	-0.775091	-0.824967	0.549044	0.41881	0.0781648	0.20134	0.775128	-0.449519	-1.47036	0.761247	-0.00912686	0.42965	0.123062	-0.91869	-1.03536	1.34009	0.654291	1.61261	0.949769
50227	TC1300000982.mm.1	Gm24331	-0.739701	1.01681	1.07222	0.490752	3.79483	-1.81192	7	0	0	0	-2.41009	-0.775091	-0.824967	0.549044	0.41881	0.0781648	0.20134	0.775128	-0.449519	-1.47036	0.761247	-0.00912686	0.42965	0.123062	-0.91869	-1.03536	1.34009	0.654291	1.61261	0.949769
53206	TC1400001223.mm.1	Gm6234	-0.568454	0.877712	1.24258	0.980546	2.76005	-1.81103	3	0	0	0	-0.238401	-1.79151	-1.27852	0.495687	-0.839177	0.810735	0.0269407	1.53489	-0.104364	-0.148131	0.756014	-1.17427	-0.236939	0.0411368	0.156289	-0.914866	-0.823251	0.132472	1.99055	1.60471
53207	TC1400001224.mm.1	Gm4666	-0.568454	0.877712	1.24258	0.980546	2.76005	-1.81103	3	0	0	0	-0.238401	-1.79151	-1.27852	0.495687	-0.839177	0.810735	0.0269407	1.53489	-0.104364	-0.148131	0.756014	-1.17427	-0.236939	0.0411368	0.156289	-0.914866	-0.823251	0.132472	1.99055	1.60471
3640	TC0100003687.mm.1	Gm16547	-0.638207	0.862565	1.17216	0.386557	4.58216	-1.81037	7	0	0	0	-1.06801	-1.03111	-1.71923	0.731746	1.17332	1.22104	0.286243	0.274662	0.897753	-1.04555	-0.506505	0.00519412	-1.06187	0.264851	-0.0336863	-0.365541	-1.53982	0.939757	0.958344	1.61839
45464	TC1100003127.mm.1	Gm23266	-0.7404	0.534376	1.06925	0.710017	3.95998	-1.80965	3	0	0	0	-0.628753	-0.687989	0.0791008	1.06848	1.06486	0.530717	0.550233	-1.26316	-0.470259	-1.45882	-0.624514	-1.39156	-1.68296	1.21423	0.0819781	0.486265	-0.0755961	1.27006	1.65724	0.280461
63453	TC1800001359.mm.1	Gm23335	-0.779915	0.702923	1.02907	0.490024	4.66106	-1.80899	5	0	0	0	-1.03951	-0.331949	-2.00836	1.18722	1.25774	0.619128	-0.00632867	-0.692318	0.182876	-0.611412	-0.48793	-1.16313	-1.64343	0.243937	0.0581483	0.129155	1.21894	0.49546	1.13289	1.45887
49887	TC1300000638.mm.1	Tspan17 // Tspan17 // Tspan17 // Tspan17 // Tspan17 // Tspan17 // Tspan17 // Tspan17 // Tspan17 // Tspan17 // Tspan17 // Tspan17 // Tspan17 // Tspan17 // Tspan17 // Tspan17 // Tspan17 // Tspan17 // Tspan17 // Tspan17 // Tspan17 // Tspan17 // Tspan17	-0.320404	0.627135	1.48779	1.08728	2.69477	-1.8082	2	0	0	0	-0.741768	-1.07917	0.785945	0.669604	0.573636	-0.366945	-0.976934	-0.798074	-0.205848	0.0570808	-0.793555	-0.265514	0.422821	-0.869689	1.16938	-0.91972	-1.12463	1.23986	0.545895	2.67763
3725	TC0100003773.mm.1	Gm24557	-0.654027	0.545531	1.15296	0.638944	4.27579	-1.80698	3	0	0	0	-0.867192	-0.810794	-0.573243	0.9983	1.2524	1.51355	-0.383619	0.0231345	0.438431	-1.1581	-0.474438	-1.13286	-0.965553	-0.168029	-0.761684	-1.37688	0.987697	0.421445	1.43555	1.60188
1988	TC0100002010.mm.1	---	-0.848934	0.655533	0.957979	0.72678	3.70803	-1.80691	3	0	0	0	-0.823338	-1.05658	0.158107	0.70256	1.45529	-0.0253213	0.335908	1.53698	-0.707714	-1.93105	-0.389234	-1.19272	-0.808264	-0.716894	-0.683003	0.773776	0.497573	0.136274	1.51651	1.22115
33534	TC0900001693.mm.1	Gm23992	-0.770293	1.05146	1.02696	0.563957	3.49821	-1.79725	7	0	0	0	-2.56035	-0.703652	-0.310588	0.60146	0.472949	-0.495696	0.268408	0.20767	-1.68595	-0.754606	0.441629	0.181475	0.605069	0.344036	-0.992796	-0.108778	1.40885	0.833498	1.66219	0.585198
843	TC0100000856.mm.1	---	-0.683941	0.364475	1.10844	0.721065	4.08745	-1.79238	2	0	0	0	-0.481921	-0.874906	-0.461135	1.04093	1.21622	1.10118	-0.184158	0.584751	-0.441402	-0.427815	-0.677774	-1.42263	-1.31261	0.0529724	-1.96886	0.378621	0.553227	0.275877	1.51667	1.53277
51788	TC1300002554.mm.1	---	-0.652561	0.813507	1.13825	0.676581	3.60237	-1.79081	4	0	0	0	-0.988204	-1.27527	1.04569	0.469831	1.30233	-1.61124	0.0839996	0.736768	-1.16553	-1.17954	-0.4882	-0.516877	0.206885	0.14912	-0.433749	1.09903	-0.849806	0.932884	0.588152	1.89372
39889	TC1000000738.mm.1	Gm22441	-0.711957	0.736908	1.06726	0.629731	3.88476	-1.77922	4	0	0	0	-0.853834	-0.723094	-0.721372	1.10521	1.26101	0.79008	1.22183	-0.955151	0.728233	-1.60427	-0.521795	-1.28756	-1.1022	-0.235924	-0.65843	-0.255314	0.610802	0.342249	1.38152	1.47802
28403	TC0700004433.mm.1	Gm23631	-0.832989	0.437733	0.941432	0.763944	3.76676	-1.77442	2	0	0	0	-0.4713	-1.03235	-0.685286	1.13372	0.751999	1.26255	1.43436	-1.40265	-1.26606	-1.38881	-0.154174	-0.83294	-0.439549	0.222463	-0.969914	0.495103	0.518544	0.127724	1.64328	1.05329
30469	TC0800001851.mm.1	AY761184 // AY761184 // AY761184 // AY761184	-0.783443	0.489738	0.983525	0.371972	6.23222	-1.76697	5	0	0	0	-0.668274	-0.995908	-0.766557	1.76622	-0.577087	1.53418	0.518207	0.325938	-0.754472	0.0413674	-0.722825	-1.61743	0.853016	-0.59148	-1.66088	0.151566	0.213833	0.700931	1.40495	0.8447
32818	TC0900000968.mm.1	---	-0.90818	0.78885	0.856456	0.321423	5.02471	-1.76464	7	0	0	0	-0.797703	-0.58715	-0.549666	0.828289	0.137188	-0.922507	1.18656	1.53849	-2.03123	-0.618755	0.148984	-1.92175	-0.473188	-0.028364	0.962392	0.752598	-0.193569	1.22639	0.645478	0.697505
41243	TC1000002105.mm.1	---	-0.641216	0.356364	1.12122	0.419669	6.35758	-1.76243	3	0	0	0	-0.393718	-0.461906	-1.03293	1.35842	0.751347	-0.192368	-0.593134	-0.580426	-0.195647	-0.781878	-0.465524	-1.15691	-1.47479	-0.420635	2.18727	0.73767	-0.64849	0.813779	1.59933	0.95054
64492	TC1900000648.mm.1	---	-0.740587	0.89525	1.02086	0.323367	4.55789	-1.76144	7	0	0	0	-1.15941	-1.24629	1.16858	0.723989	0.235317	-0.0521655	1.09377	0.27824	-1.3628	-0.435715	-0.951686	-1.19679	1.26857	-0.216799	-1.352	0.983975	-0.841369	0.777038	0.897859	1.38768
49096	TC1200002499.mm.1	Gm27649	-0.909993	0.35681	0.851225	0.470058	5.81164	-1.76122	3	0	0	0	-1.4861	-0.67154	-0.709097	0.477247	0.416659	1.75138	-0.786644	-1.49709	-1.12358	-1.12208	-0.421414	-0.83614	-0.145473	0.51419	0.876946	1.12038	1.08867	0.547328	0.6137	1.39265
33643	TC0900001803.mm.1	Gm22854	-0.697402	0.597349	1.06348	0.612338	4.19781	-1.76089	3	0	0	0	-0.399939	-0.93178	-1.72261	1.12534	1.5163	0.934794	0.184559	0.708382	-0.394319	0.178604	-0.627416	-0.984352	-1.12276	-0.244362	-1.6495	-0.24586	0.484467	0.511187	1.72197	0.957291
26094	TC0700002096.mm.1	Slc22a18 // Slc22a18 // Slc22a18 // Slc22a18 // Slc22a18 // Slc22a18 // Slc22a18 // Slc22a18 // Slc22a18 // Slc22a18 // Slc22a18 // Slc22a18 // Slc22a18 // Slc22a18 // Slc22a18 // Slc22a18 // Slc22a18 // Slc22a18 // Slc22a18 // Slc22a18 // Slc22a18	-0.662446	0.580269	1.09535	0.521756	4.7174	-1.75779	4	0	0	0	-0.775119	-0.0550198	-0.250929	1.903	0.874117	-0.225475	0.526615	0.389145	-1.02183	-0.758344	-1.67191	-0.103968	-0.932778	-0.767952	0.237279	0.932476	-1.58535	0.514832	1.24603	1.52518
6765	TC0200002950.mm.1	Gm23877	-0.562798	0.665506	1.19417	0.122924	6.72246	-1.75697	6	0	0	0	-0.311831	-0.229985	-1.11141	0.425432	1.17337	-0.041801	0.566035	1.5629	0.610417	-1.1475	-0.507303	-1.24197	-1.35076	-0.365269	-1.84438	0.34811	-0.116562	1.32786	1.16863	1.08602
39470	TC1000000317.mm.1	Gm24710	-0.735288	1.03389	1.01884	0.612898	3.32737	-1.75413	6	0	0	0	-2.30959	-0.792166	-0.670509	0.538683	0.67781	-0.00860697	0.0463907	1.12778	-0.290951	-1.59397	0.97318	-0.463006	0.253581	-0.438948	-1.0349	-0.295083	1.22378	0.315211	1.4364	1.30491
56052	TC1500001230.mm.1	Gm24135	-0.735288	1.03389	1.01884	0.612898	3.32737	-1.75413	6	0	0	0	-2.30959	-0.792166	-0.670509	0.538683	0.67781	-0.00860697	0.0463907	1.12778	-0.290951	-1.59397	0.97318	-0.463006	0.253581	-0.438948	-1.0349	-0.295083	1.22378	0.315211	1.4364	1.30491
896	TC0100000909.mm.1	Olfr1412 // Olfr1412 // Olfr1412 // Olfr1412 // Olfr1412	-0.660742	0.734759	1.08757	0.457346	4.56233	-1.74831	6	0	0	0	0.628586	-1.05979	-0.385614	0.614883	0.939212	-0.976926	0.0416366	0.552836	-0.956116	-0.724942	-0.383268	-1.74405	-1.3704	-0.495824	0.35517	1.97296	-0.271048	1.03915	1.56719	0.656353
50796	TC1300001553.mm.1	Olfr1361 // Olfr1361 // Olfr1361 // Olfr1361 // Olfr1361	-0.810709	0.720348	0.936152	0.512363	4.34502	-1.74686	5	0	0	0	-0.57605	0.315751	-0.360799	1.09416	0.651128	0.580518	-0.314662	0.609869	-1.227	-1.12994	-0.742889	-1.95404	-1.091	-0.474485	-0.173017	2.06183	-0.0778373	0.878061	1.47508	0.455311
12003	TC0300002726.mm.1	Gm12498 // RP23-214E3.11	-0.772169	0.797527	0.968512	0.0834966	5.70216	-1.74068	6	0	0	0	0.0563675	-1.26218	-1.67018	1.35669	0.935708	0.545784	0.293409	0.13562	0.443265	-0.854887	-0.592485	-1.52508	-1.26128	-0.642457	-0.754848	1.53802	0.353001	0.986202	1.04175	0.877588
62855	TC1800000754.mm.1	Gm20343	-0.484281	0.641809	1.24502	0.557619	4.28997	-1.7293	4	0	0	0	-0.670862	-0.990091	0.470132	1.03246	0.936253	-1.54444	0.569197	0.961955	-0.566807	0.366435	-0.933226	-1.06555	0.476271	-1.42163	-0.266298	-1.29474	0.205889	1.12984	1.85123	0.753981
29152	TC0800000521.mm.1	Pdlim3 // Pdlim3 // Pdlim3 // Pdlim3 // Pdlim3 // Pdlim3	-0.503767	0.511658	1.22175	1.0279	2.76448	-1.72551	2	0	0	0	-0.86889	-1.07953	-0.376375	1.75149	1.04229	0.0677803	-0.0754447	-0.140035	-0.453119	-0.387296	-0.838099	0.476948	-0.97812	-0.741154	0.0536343	0.611313	-1.73062	1.63237	0.0520064	1.98086
26052	TC0700002053.mm.1	Pnpla2 // Pnpla2 // Pnpla2 // Pnpla2 // Pnpla2 // Pnpla2 // Pnpla2 // Pnpla2 // Pnpla2 // Pnpla2 // Pnpla2 // Pnpla2 // Pnpla2 // Pnpla2 // Pnpla2 // Pnpla2 // Pnpla2 // Pnpla2 // Pnpla2 // Pnpla2 // Pnpla2 // Pnpla2 // Pnpla2 // Pnpla2 // Pnpla2 // Pnpla2 // Pnpla2	-0.700354	0.631277	1.02237	0.121968	6.92483	-1.72272	6	0	0	0	-0.647887	-1.53065	-0.546733	-0.0238456	-0.256884	0.704627	0.0761433	0.643769	0.398515	-1.00819	-1.20752	-0.360018	1.33337	2.06263	-0.476517	-0.736111	-1.4918	0.895102	1.03376	1.13824
56546	TC1500001733.mm.1	Gm10238	-0.901467	0.367726	0.820497	0.624391	4.45691	-1.72196	2	0	0	0	-0.895181	-1.39681	-1.16265	1.42163	1.90345	0.729657	0.196398	1.47149	-0.490304	-1.21828	-0.49228	-0.654769	-0.723704	-0.731216	-0.302982	0.227918	-0.343855	1.54081	0.487233	0.433446
58271	TC1600001123.mm.1	---	-0.733996	0.782641	0.984056	0.842147	3.01874	-1.71805	3	0	0	0	-2.01578	-1.10079	0.538026	1.32197	1.59642	-0.703485	0.427406	0.260593	-0.528481	-0.300055	-0.950642	-0.780254	-0.624052	1.07944	-0.0689972	-0.451325	-0.652169	1.38637	0.0162047	1.54959
52251	TC1400000247.mm.1	---	-0.622619	0.450713	1.0936	0.743467	3.7163	-1.71622	2	0	0	0	-0.603619	-0.518399	-0.512586	0.981807	0.0652937	0.652869	0.888043	-1.64855	0.173629	-0.658102	-1.30158	-0.937675	-0.848668	-0.134703	-0.327694	2.06203	-0.612899	0.440531	0.937575	1.9027
10699	TC0300001404.mm.1	---	-0.642405	0.44186	1.07094	0.529749	4.91666	-1.71334	3	0	0	0	-0.149255	-0.638969	-0.870555	0.708043	1.08026	1.05486	1.38766	0.426527	-0.892199	-0.0746809	-0.535865	-1.33531	-1.28078	-0.0815204	-2.0114	-0.421992	0.422356	0.462285	1.4281	1.32243
34409	TC0900002573.mm.1	---	-0.760349	0.542207	0.94256	0.70746	3.72643	-1.70291	3	0	0	0	-1.5364	-0.870063	-1.22599	0.0603093	0.970996	-0.867901	0.292358	-0.258314	-0.723195	-0.783294	-0.227486	0.0439903	-0.68219	1.1705	1.44054	1.543	-1.17453	0.447802	0.626992	1.75289
11936	TC0300002658.mm.1	---	-0.554842	1.17828	1.14423	0.34671	3.47982	-1.69908	7	0	0	0	0.726676	-1.37635	-2.28445	0.205172	-0.228936	1.22195	-0.692412	0.0817867	0.658052	0.240001	-0.355576	-1.49225	-0.0740091	-0.85712	-0.611266	0.99522	0.410816	0.796824	1.49024	1.14564
2658	TC0100002689.mm.1	---	-0.970556	0.701251	0.727003	0.455746	4.54528	-1.69756	6	0	0	0	-1.28693	-0.325257	-1.05003	0.0491517	1.02408	0.461397	-0.34499	-0.261925	0.270152	-1.76595	-1.40259	-1.23328	-0.483934	1.10677	1.41099	0.0544826	1.59686	0.293782	1.20235	0.684878
57503	TC1600000347.mm.1	---	-0.515543	0.572265	1.17912	0.305712	6.07031	-1.69466	7	0	0	0	-0.477373	0.332421	-0.641723	-0.378654	0.0219049	-0.418308	1.56948	2.15433	-0.568153	-1.33167	0.0650372	-0.987336	-0.248223	-0.861312	-1.06561	0.426082	-1.12824	1.04123	1.52949	0.966634
14872	TC0400002363.mm.1	4933421O10Rik // 4933421O10Rik // 4933421O10Rik	-0.932949	0.572529	0.753996	0.670288	3.80471	-1.68695	3	0	0	0	-1.22093	-0.152863	-1.30441	0.991782	0.947251	1.89289	-0.186807	0.767638	-0.270048	-1.76059	-0.987978	-0.833823	-0.884716	0.734699	-0.327838	-0.450618	0.784376	1.06536	-0.0153436	1.21197
37254	TC0X00002083.mm.1	---	-0.674228	0.839124	1.01016	0.268964	4.76984	-1.68439	7	0	0	0	-1.53357	-0.806509	0.950713	0.745432	0.896342	0.034369	-1.16391	1.385	-1.40871	-1.05503	-0.315424	-0.551068	-0.840519	0.366582	1.01811	0.516485	-1.26878	0.808499	0.906449	1.31554
45495	TC1100003158.mm.1	Emc6 // Emc6 // Emc6 // Emc6 // Emc6 // Emc6 // Emc6 // Emc6 // Emc6 // Emc6 // Emc6	-0.685328	1.09813	0.997325	0.538132	3.2455	-1.68265	7	0	0	0	-1.74789	-1.12544	0.396226	0.599823	0.767563	-0.469655	0.895434	1.05877	-0.244848	-2.42235	0.34143	0.00557579	0.267837	-0.0861147	-0.130183	0.200063	-1.29821	0.796621	0.588389	1.60697
60007	TC1700000702.mm.1	Gm19645	-0.613758	0.643239	1.06644	0.666213	3.69247	-1.68019	3	0	0	0	-0.157945	-0.422061	-1.63287	1.20108	-0.1988	1.44205	-0.657552	-0.325439	-0.0165273	-1.42841	-0.266227	-0.372269	-0.466384	-0.825776	-0.358457	1.98961	-0.703333	0.448504	0.978591	1.77221
50198	TC1300000952.mm.1	Gm23019	-0.713728	0.568392	0.960662	0.694343	3.68148	-1.67439	3	0	0	0	-0.494168	-1.05406	-1.77312	1.01209	0.79647	1.8915	0.384723	-1.81715	-0.365331	-0.836724	-0.063455	-0.40924	-0.237175	0.160293	-0.677164	-0.121377	0.721911	0.166064	1.26538	1.45054
34089	TC0900002252.mm.1	Ttc12 // Ttc12 // Ttc12 // Ttc12 // Ttc12 // Ttc12 // Ttc12 // Ttc12 // Ttc12	-0.777354	0.734156	0.894985	0.809794	3.07597	-1.67234	3	0	0	0	-0.481391	-0.588859	0.34391	0.458258	0.619205	0.569396	1.86002	-0.0805436	-0.826262	-0.833912	-2.12855	-0.926408	1.40025	-0.892055	-0.476656	-0.673344	-0.0280029	0.121544	0.826613	1.7368
26307	TC0700002312.mm.1	Vmn1r68 // Vmn1r68 // Vmn1r68 // Vmn1r68 // Vmn1r68	-0.658707	0.859395	1.01361	0.882007	2.76872	-1.67232	3	0	0	0	0.293079	-0.269334	-0.609851	-0.0620924	-0.158794	1.6098	0.15681	-0.132729	-0.234613	-2.3913	-1.00475	-0.394175	-1.04995	0.17197	0.745496	1.26303	-0.973423	0.00149563	1.42141	1.61793
30243	TC0800001623.mm.1	Cd209d // Cd209d // Cd209d // Cd209d // Cd209d // Cd209d	-0.515876	0.608413	1.15599	0.404451	5.10133	-1.67187	5	0	0	0	-0.577004	-0.586546	-0.693897	1.78348	0.966507	-1.03667	1.30446	0.449403	0.0137227	0.20784	-1.66999	-0.305256	-0.599829	-1.17274	-0.505992	0.166166	-1.21163	0.980151	0.869224	1.6186
42730	TC1100000371.mm.1	---	-0.591096	0.689077	1.07797	0.556671	4.03473	-1.66906	4	0	0	0	0.75557	-0.125792	-1.03338	-0.0463865	-1.65725	1.66958	0.365901	-1.11345	-0.782353	-0.829448	-0.851295	-1.27097	0.225518	0.342932	-0.0580391	1.54341	-0.368447	0.56249	1.66826	1.00315
13910	TC0400001397.mm.1	Gm22154	-0.416541	0.679347	1.2464	0.558743	4.03328	-1.66294	4	0	0	0	-0.779695	0.780673	-0.10524	1.63025	1.27541	0.428301	-1.06709	-0.366827	-0.344974	-0.601563	-1.44979	-0.415197	-0.603843	-0.0425242	-1.8814	0.0826666	-0.27834	1.78684	0.670999	1.28136
23087	TC0600002680.mm.1	1700031F10Rik // 1700031F10Rik // RP23-74G1.2 // RP23-74G1.2 // 1700031F10Rik	-0.79105	0.473945	0.871094	0.425336	5.46827	-1.66214	4	0	0	0	-0.173691	-0.599549	-1.08955	0.924041	0.406917	1.73172	0.827406	0.132497	-0.905728	-0.265675	-0.999096	-1.50406	-0.951651	-0.323042	-1.59855	1.50909	0.265633	0.949148	0.412137	1.252
46668	TC1200000035.mm.1	---	-0.612222	0.500143	1.04502	0.595939	4.22145	-1.65724	3	0	0	0	-0.675364	-0.452667	-0.62684	1.35659	1.22077	0.969055	-1.28738	-0.271831	-0.380045	0.242372	-1.24226	-1.15075	-1.1776	0.0248306	0.399823	-1.33364	1.24989	0.411958	1.59515	1.12794
65322	TC1900001485.mm.1	Sorbs1 // Sorbs1 // Sorbs1 // Sorbs1 // Sorbs1 // Sorbs1 // Sorbs1 // Sorbs1 // Sorbs1 // Sorbs1 // Sorbs1 // Sorbs1 // Sorbs1 // Sorbs1 // Sorbs1 // Sorbs1 // Sorbs1 // Sorbs1 // Sorbs1 // Sorbs1 // Sorbs1 // Sorbs1 // Sorbs1 // Sorbs1 // Sorbs1	-0.451174	0.612039	1.20206	0.990796	2.67929	-1.65323	2	0	0	0	-0.745067	-1.15235	0.0861704	1.63752	1.48937	-0.324645	0.13262	-0.0465012	-0.167261	-0.165641	-1.28562	0.271559	-1.17519	-0.327778	-0.344012	0.0580238	-1.54736	0.721273	0.543384	2.34151
85	TC0100000087.mm.1	---	-0.733331	0.518618	0.917375	0.634274	3.97415	-1.65071	3	0	0	0	-1.60436	-0.663804	-0.633713	1.47239	1.58417	0.459029	-1.06483	-0.181454	-0.397463	-0.0709689	-0.531575	-1.23144	-0.232497	-0.879069	1.79256	-0.151555	-0.417556	1.39002	0.196535	1.16557
4387	TC0200000550.mm.1	Hmcn2 // Hmcn2 // Hmcn2 // Hmcn2 // Hmcn2 // Hmcn2 // Hmcn2 // Hmcn2	-0.445685	0.517203	1.19907	0.158083	7.62374	-1.64475	7	0	0	0	-0.186749	-0.150552	-0.17791	1.62241	1.57898	-0.221347	0.34092	0.341371	0.19829	-0.583797	-0.930716	-1.28836	-1.81447	-1.52159	-0.266734	0.185009	-0.721968	1.38161	1.10761	1.10799
48478	TC1200001867.mm.1	Gm23018	-0.756407	0.809613	0.887013	0.632612	3.44905	-1.64342	4	0	0	0	-1.97539	-0.976364	-1.04894	0.820628	0.479185	-0.0549302	1.92353	-1.33262	-0.787675	0.00903735	0.526069	-1.04158	0.131026	-0.162033	-0.486684	0.225649	1.09006	0.229092	1.49084	0.941106
3691	TC0100003739.mm.1	Marc2 // Marc2 // Marc2 // Marc2 // Marc2 // Marc2 // Marc2 // Marc2 // Marc2 // Marc2 // Marc2 // Marc2 // Marc2 // Marc2 // Marc2 // Marc2 // Marc2 // Marc2 // Marc2 // Marc2 // Marc2 // Marc2 // Marc2 // Marc2 // Marc2	-0.739144	0.678291	0.903579	0.463186	4.4343	-1.64272	5	0	0	0	-0.202322	0.192036	-1.51524	1.45438	0.401966	0.332011	0.700003	1.81501	-0.759077	-0.866587	-1.65871	-0.364113	0.210919	-0.946959	0.469301	-0.628278	-1.34508	1.24029	0.375347	1.0951
15426	TC0400002921.mm.1	Mir466h // Mir466h	-0.561115	0.352632	1.07333	0.748975	3.61206	-1.63444	2	0	0	0	-0.607239	-0.405535	0.0618262	0.56714	1.63898	0.455422	-0.352436	-0.62198	-0.652436	-0.651697	-0.550318	-1.1224	-1.03076	-0.0851747	1.49448	-2.00567	0.647818	0.287002	1.77831	1.15467
40502	TC1000001360.mm.1	---	-0.887964	0.486839	0.744192	0.470397	4.97533	-1.63216	3	0	0	0	-0.477873	-0.546643	-1.3752	1.55162	1.007	-0.811488	0.483016	1.18526	-0.387868	-0.620624	-1.25158	-1.55596	0.200125	-1.21664	1.58466	-0.320259	0.319869	0.218334	1.12493	0.889311
43910	TC1100001561.mm.1	Gm27399	-0.826007	0.594545	0.799186	0.167946	6.64038	-1.62519	7	0	0	0	-1.3025	-0.32108	-1.10207	1.33151	0.915886	1.07635	-0.0385878	-2.07044	-1.11395	0.309113	-1.2018	-1.04976	0.443914	0.303923	1.28502	-0.178525	0.315445	0.845629	0.939024	0.612906
48014	TC1200001396.mm.1	---	-0.776402	0.867732	0.843901	0.470767	3.80391	-1.6203	7	0	0	0	-0.333738	0.366442	-0.330188	0.572518	1.10147	0.461539	0.469621	1.2955	-0.549527	-2.23304	-0.776281	-1.57848	-1.51649	-0.679829	-0.126754	0.230611	1.09493	0.413821	1.34686	0.771025
44203	TC1100001856.mm.1	Gm26052	-0.488166	0.520036	1.13037	0.658543	3.78152	-1.61853	3	0	0	0	-0.0638301	-1.2533	-0.30055	0.802263	1.29849	0.504944	0.500909	0.458409	-0.42963	0.110351	-0.331846	-1.14836	-1.17696	-0.167791	-0.893465	-2.21647	0.915725	0.404217	1.68891	1.29797
31244	TC0800002631.mm.1	---	-0.664182	0.76622	0.952321	0.152188	5.34134	-1.6165	6	0	0	0	-1.85471	-0.640378	-0.468921	1.84492	0.714847	-0.763348	-0.200382	-0.752505	0.649002	-1.07665	-0.337758	-0.91985	-0.647907	0.525195	1.22463	0.99849	-1.15163	0.811993	0.930877	1.11409
61598	TC1700002313.mm.1	Plin4 // Plin4 // Plin4 // Plin4 // Plin4	-0.38607	0.809573	1.22224	0.257659	4.72708	-1.60831	7	0	0	0	0.84532	-0.263472	-0.795022	1.06122	0.951659	0.165191	0.339956	0.131741	0.431124	-0.82462	-1.54674	-0.549078	-0.338383	-1.97287	0.83993	-0.747326	-1.39536	1.51935	1.08727	1.06011
37078	TC0X00001902.mm.1	---	-0.944866	1.01164	0.661678	0.187275	4.04309	-1.60654	6	0	0	0	-2.17223	-1.71297	-1.05136	0.960253	0.971307	1.2531	0.547929	-0.804651	-0.590841	-1.2132	1.01266	-0.886121	0.198621	0.467895	0.378153	-0.00815224	0.664575	0.563983	0.543453	0.877599
52940	TC1400000954.mm.1	Gm27647	-0.835736	0.94728	0.770801	0.132944	4.38737	-1.60654	6	0	0	0	-2.11735	0.13354	-1.56637	1.57374	0.562104	-0.205553	1.27095	0.728737	-1.46256	-1.0628	0.00169522	0.2237	0.3238	-0.309551	0.0037313	-1.11146	0.701257	0.618353	0.831412	0.862638
43713	TC1100001363.mm.1	Cuedc1 // Cuedc1 // 2210416O15Rik // Cuedc1 // Cuedc1 // Cuedc1 // Cuedc1 // Cuedc1 // Cuedc1 // Cuedc1 // Cuedc1 // Cuedc1 // Cuedc1 // Cuedc1 // Cuedc1 // Cuedc1 // Cuedc1 // 2210416O15Rik // Cuedc1 // Cuedc1 // Cuedc1 // Cuedc1 // Cuedc1 // Cuedc1 // Cuedc1 // Cuedc1 // Cuedc1 // Cuedc1 // Cuedc1 // 2210416O15Rik	-0.351442	0.35066	1.254	0.699251	3.77829	-1.60544	2	0	0	0	-0.468892	-0.269935	-0.670989	1.30395	0.82278	-1.04793	0.513914	0.914869	0.00789945	-0.325791	-0.85864	0.126251	-1.9546	0.0931685	0.0399128	-0.181902	-1.80607	1.44492	0.479114	1.83796
26635	TC0700002640.mm.1	---	-0.564776	0.612549	1.03779	0.992796	2.59239	-1.60257	2	0	0	0	-1.13829	-1.1854	0.0246706	0.815275	1.00179	1.65922	-0.848393	-0.560582	0.0622225	-0.132555	-1.29528	-0.288789	-0.0960137	0.972829	-1.26917	0.269331	-1.10424	-0.0816648	1.38362	1.81143
17229	TC0500000509.mm.1	Gm10025	-0.794331	1.02148	0.797894	0.552412	3.1795	-1.59223	7	0	0	0	-2.41518	-0.624918	-1.66637	0.9378	0.839141	0.338984	-1.07515	0.872921	-0.248229	-0.910416	0.760639	-0.455845	0.841316	0.563585	-0.820263	-0.0294894	0.697794	0.598851	1.42224	0.372587
33604	TC0900001764.mm.1	Gm17571	-0.750315	0.546556	0.841281	0.592327	3.98366	-1.5916	3	0	0	0	-1.24276	-0.502886	-1.28215	0.895762	0.891593	1.62579	0.960057	-1.29032	-0.734673	-1.30024	0.0528571	-0.242355	0.0337396	0.412859	-1.72221	0.297873	0.623217	0.158752	1.22084	1.14425
26779	TC0700002788.mm.1	Fxyd1 // Fxyd1 // Fxyd1 // Fxyd1 // Fxyd1 // Fxyd1 // Fxyd1 // Fxyd1 // Fxyd1 // Fxyd1 // Fxyd1 // Fxyd1 // Fxyd1 // Fxyd1 // Fxyd1 // Fxyd1 // Fxyd1 // Fxyd1	-0.420739	0.678926	1.15338	1.06237	2.36753	-1.57412	2	0	0	0	-1.0626	-1.06881	0.0542908	1.4346	1.72939	-0.454649	-0.0855125	0.111141	0.135603	0.0327822	-1.28432	0.247876	-0.102876	-1.03757	-0.29265	-0.338921	-1.47791	1.42477	-0.0183655	2.05374
17135	TC0500000415.mm.1	---	-0.891704	0.619709	0.681987	0.187592	6.09825	-1.57369	7	0	0	0	-1.04915	-0.969189	-0.329948	1.37749	1.59565	0.76052	0.137495	1.24828	-1.86472	-0.761669	0.0224958	-1.28974	0.485341	-1.6724	0.127375	0.127401	0.00881733	0.535298	0.893363	0.6173
48688	TC1200002078.mm.1	Aldh6a1 // Aldh6a1 // Aldh6a1 // Aldh6a1 // Aldh6a1 // Aldh6a1	-0.496473	0.723924	1.07546	0.613921	3.51056	-1.57193	4	0	0	0	-1.21829	-0.649688	-0.12058	1.31314	0.622654	-0.00630406	-0.0799	-0.0616664	0.27629	-0.157782	-1.6856	0.0803387	-0.500545	1.72787	0.195202	-1.23096	-1.73057	0.418994	1.17198	1.6354
58131	TC1600000981.mm.1	Sod1 // Sod1 // Sod1 // Sod1 // Sod1 // Sod1 // Sod1 // Sod1	-0.558909	0.812801	1.01298	0.672833	3.17389	-1.57189	4	0	0	0	-1.89617	-0.990474	-0.102105	1.41892	1.71586	-0.344334	0.0438895	-0.491396	-0.393629	-0.820076	-0.444037	0.734133	0.573375	-0.560266	-0.00786697	0.215502	-1.69027	0.925091	0.388413	1.72544
22677	TC0600002266.mm.1	---	-0.399071	0.692755	1.17258	0.493562	4.06125	-1.57165	5	0	0	0	-0.213647	0.279015	-0.199627	0.982075	-0.314174	-2.72013	-0.0500031	0.0617045	-0.556338	-1.82608	-0.410932	0.134106	-0.314676	-0.0826	0.705141	-0.133597	1.14201	0.612409	1.54354	1.3618
33745	TC0900001907.mm.1	Gm6607 // Gm6607	-0.512769	0.529462	1.05499	0.747563	3.29539	-1.56775	2	0	0	0	-0.117931	-1.05653	-0.928817	0.314363	1.1198	2.05687	-0.601095	-1.78081	-0.325576	0.243285	-0.266527	-1.13728	-1.10855	-0.175846	0.45465	0.534948	-0.38992	0.759672	0.500188	1.9051
35201	TC0M00000025.mm.1	mt-Ts1	-0.633432	0.649127	0.933808	0.399258	4.65545	-1.56724	6	0	0	0	-0.741675	-1.28384	0.0602754	1.22627	1.4485	0.486647	0.909171	-1.06524	-0.24743	-0.0131519	-1.66775	-0.540444	-1.59688	0.968206	-0.275868	0.558093	-1.0263	0.960062	0.522071	1.31929
1371	TC0100001389.mm.1	---	-0.484647	1.00521	1.0791	0.38466	3.55331	-1.56374	7	0	0	0	0.251025	0.721338	-0.385001	0.0437152	-0.215466	-0.411863	1.48978	-0.305544	-0.492546	-2.21587	0.0764172	-1.34789	-2.01253	-0.0112209	0.767166	0.456003	0.355204	0.865392	1.52316	0.848739
19611	TC0500002916.mm.1	Gm27527	-0.632855	0.640084	0.930069	0.723198	3.23879	-1.56292	3	0	0	0	-0.118906	-1.02263	0.301595	1.6523	-0.362705	-0.0935452	1.9253	0.885099	-1.69566	-0.743169	-0.677341	-0.473873	-0.897073	0.471821	-0.184773	-1.13537	-0.621274	0.103358	1.44554	1.24131
62130	TC1800000023.mm.1	---	-0.657548	0.632113	0.902483	0.394155	4.72808	-1.56003	6	0	0	0	-1.87024	-1.1081	-0.637964	1.60897	1.7795	1.06308	-0.694752	0.190843	-0.422876	-0.122823	-0.231296	-0.209539	-0.863006	0.61423	-0.203976	-0.101772	-1.49773	1.22625	0.463581	1.01762
47864	TC1200001244.mm.1	Apopt1 // Apopt1 // Apopt1 // Apopt1 // Apopt1 // Apopt1 // Apopt1 // Apopt1 // Apopt1 // Apopt1 // Apopt1 // Apopt1 // Apopt1 // Apopt1 // Apopt1 // Apopt1 // Apopt1	-0.374702	0.897985	1.18518	0.55345	3.34629	-1.55989	6	0	0	0	-1.67411	-0.0779372	0.862178	1.14669	0.702349	-1.32558	0.348612	1.24247	-0.0135652	-1.4971	-0.0738673	-0.14851	-0.577437	-0.574496	-0.869145	0.253887	-1.27998	1.1009	0.678713	1.77594
9309	TC0200005514.mm.1	Zhx3 // Zhx3 // Zhx3 // Zhx3 // Zhx3 // Zhx3 // Zhx3 // Zhx3 // Zhx3 // Zhx3 // Zhx3 // Zhx3 // Zhx3 // Zhx3 // Zhx3	-0.825146	0.94499	0.73416	0.820278	2.62874	-1.55931	4	0	0	0	-1.09731	-0.851643	-0.188081	1.27825	1.17594	1.26183	0.552332	0.0806109	-0.145248	-2.78699	-0.599543	-0.107209	-0.235544	-0.503455	-0.15874	0.631707	-0.509383	0.607143	-0.0152012	1.61054
4036	TC0200000195.mm.1	Mir669m-2	-0.713656	0.315902	0.844572	0.830688	3.15279	-1.55823	2	0	0	0	-0.753354	-0.632949	-0.528643	0.653269	1.54384	-1.29022	0.784274	2.03256	-0.840248	-0.518876	-0.381594	-1.33993	-0.863702	-0.40916	-0.333641	-0.538569	0.883227	-0.0936695	1.48638	1.14101
50036	TC1300000788.mm.1	Gm24130	-0.626556	0.985408	0.93008	0.547653	3.18616	-1.55664	6	0	0	0	-2.48951	-0.684866	-0.0513415	0.807093	1.22081	1.05184	0.245472	-0.69671	-0.58898	0.0841281	0.489697	-1.14502	0.581591	-0.0616641	-0.0638019	-1.74008	0.251104	0.303886	1.31957	1.16679
10931	TC0300001636.mm.1	---	-0.576039	0.495951	0.975076	0.741111	3.32045	-1.55111	2	0	0	0	-0.886285	-1.18315	0.0866071	-0.27751	-0.195397	0.564524	0.427809	-1.08469	-0.580372	-1.0156	-0.486176	0.0327006	1.93013	0.224898	-1.78807	-0.250676	1.55602	1.43196	1.37328	0.119985
46859	TC1200000230.mm.1	Gm4166	-0.84529	0.718745	0.704441	0.468898	4.04081	-1.54973	6	0	0	0	-0.197627	-0.415686	-1.91709	0.585625	-0.221949	1.74192	0.448949	-0.557437	0.0317079	-0.933839	-0.885411	-1.59909	-1.06455	0.36705	1.31315	-0.220014	1.41097	0.950769	0.163715	0.998839
30346	TC0800001726.mm.1	Gm15349	-0.447533	1.18763	1.097	0.291675	3.22161	-1.54453	7	0	0	0	-0.390775	1.04624	-2.02676	-0.630221	-0.49163	0.0748399	1.58926	1.01744	-0.172974	-2.05957	-0.0163626	0.487477	-0.955437	-0.18536	-0.340824	-0.288724	0.0523848	1.27007	0.760245	1.26068
21493	TC0600001074.mm.1	Klf15 // Klf15 // Klf15 // Klf15 // Klf15 // Klf15 // Klf15 // Klf15 // Klf15 // Klf15	-0.719988	0.65045	0.821408	0.264998	5.32312	-1.5414	7	0	0	0	-0.96434	-0.518054	-0.846368	1.14363	1.21388	-1.90219	1.69083	-0.720647	0.19506	-0.0316278	-1.63959	-1.235	0.432865	0.238874	0.736808	0.0573509	-0.315706	0.693006	1.12615	0.64507
58241	TC1600001093.mm.1	B230307C23Rik // B230307C23Rik // B230307C23Rik	-0.731531	0.705441	0.805917	0.562813	3.6577	-1.53745	4	0	0	0	-0.498267	-1.2062	-0.238118	1.65519	0.832773	0.729436	1.40803	1.00361	-0.663998	-1.9921	0.200696	-0.722736	0.10704	-1.30869	-0.492178	-0.563552	-0.668696	0.548088	1.45146	0.418206
11679	TC0300002398.mm.1	---	-0.581995	0.672844	0.955032	0.696092	3.23181	-1.53703	3	0	0	0	-0.316612	-0.571305	0.0787915	-0.351991	0.338635	2.26982	-1.3683	1.16762	-1.94093	-0.127213	-0.876813	-0.319886	-0.598168	0.131493	0.119701	0.480335	-0.980276	0.277454	0.919374	1.66827
35205	TC0M00000029.mm.1	mt-Tp	-0.480221	0.683737	1.05083	0.434249	4.25222	-1.53105	6	0	0	0	0.299884	-0.565636	-0.585947	1.05118	1.05408	1.72042	0.808548	-0.177896	0.00487198	-0.0145569	-1.76989	-0.730268	-1.27803	0.0687554	-1.46206	-0.710422	-0.865522	1.32951	0.550485	1.2725
9406	TC0300000095.mm.1	Car3 // Car3 // Car3 // Car3 // Car3 // Car3	-0.457686	0.612945	1.07173	0.981139	2.49903	-1.52942	2	0	0	0	-0.23207	-0.669191	0.0333272	1.59312	1.25765	-0.240261	0.00736556	-0.278098	0.237814	-0.164833	-1.54557	-0.863281	0.935201	-1.77404	0.179623	-0.556084	-1.13587	2.14572	0.222425	0.847039
52526	TC1400000523.mm.1	---	-0.925692	0.689053	0.600007	0.364594	4.55611	-1.5257	7	0	0	0	-1.88167	0.260255	-0.811515	-0.0531705	1.65807	1.43196	0.0791365	0.228356	-0.666681	-0.939629	-0.849836	-1.59077	-0.626168	-0.0614014	0.343191	-0.165432	1.84528	0.315185	0.473929	1.01091
43511	TC1100001159.mm.1	Slc13a2os // Slc13a2os	-0.549408	0.279615	0.976155	0.764909	3.3596	-1.52556	2	0	0	0	-0.624428	-0.244247	-0.246352	-0.76183	0.707975	0.260431	0.886461	-2.42373	-0.540213	-0.389248	-0.845974	-0.955395	-0.394554	-0.428165	1.73152	1.08522	0.254065	0.612228	0.461158	1.85508
48035	TC1200001418.mm.1	Msgn1 // Msgn1 // Msgn1 // Msgn1 // Msgn1	-0.536491	0.802763	0.987086	0.447956	3.82151	-1.52358	6	0	0	0	-1.99164	-0.152683	-0.513794	-0.305334	0.318629	1.54522	0.259311	0.976172	-0.378394	-0.628239	0.691349	-0.782036	-0.311028	0.419172	0.907529	-2.03169	-0.983803	1.45406	0.560946	0.946249
2053	TC0100002075.mm.1	Gm10222	-0.343026	0.917353	1.17735	0.296426	3.93203	-1.52037	7	0	0	0	-1.73095	-1.28272	-0.0894219	1.47595	1.47595	0.237877	-0.586672	-0.299299	0.49305	-0.145399	-0.492321	0.846585	-0.366642	0.235056	-1.13007	-0.843568	-1.32943	0.952559	1.0662	1.51328
24326	TC0700000317.mm.1	Vmn1r91 // Vmn1r91 // Vmn1r91 // Vmn1r91 // Vmn1r91	-0.551574	0.707996	0.968035	0.764191	2.9449	-1.51961	3	0	0	0	0.203511	-1.8745	-0.306641	1.19973	1.19228	-1.65847	0.208999	-0.470823	-0.320213	0.0546359	-0.616802	-1.00101	-1.07672	-0.525809	1.44281	0.697525	-0.052604	1.82214	0.733004	0.348965
1955	TC0100001977.mm.1	---	-0.825175	0.854846	0.692461	0.787616	2.72061	-1.51764	4	0	0	0	-1.77932	-1.38233	-0.498919	1.21487	1.40722	1.13147	0.735543	-0.429561	0.37605	-1.86019	-0.205948	-0.425575	-0.094754	0.502128	-0.712104	0.6569	-0.712866	0.340143	0.142505	1.59474
53548	TC1400001567.mm.1	Kcnma1 // Kcnma1 // Kcnma1 // Kcnma1 // Kcnma1 // Kcnma1 // Kcnma1 // Kcnma1 // Kcnma1 // Kcnma1 // Kcnma1 // Kcnma1 // Kcnma1 // Kcnma1 // Kcnma1 // Kcnma1 // Kcnma1 // Kcnma1 // Kcnma1 // Kcnma1 // Kcnma1 // Kcnma1 // Kcnma1 // Kcnma1 // Kcnma1 // Kcnma1 // Kcnma1 // Kcnma1 // Kcnma1 // Kcnma1 // Kcnma1 // Kcnma1 // Kcnma1 // Kcnma1 // Kcnma1 // Kcnma1 // Kcnma1 // Kcnma1 // Kcnma1 // Kcnma1 //…	-0.333465	0.387928	1.18269	0.864237	2.91533	-1.51616	2	0	0	0	-0.99831	-0.649105	-0.196229	1.67794	1.5989	0.152464	-0.411795	0.147699	0.167452	-0.129579	-0.406329	-0.122155	-0.999283	-1.72819	-0.573685	0.218271	-1.29614	0.878714	0.511518	2.15785
52152	TC1400000148.mm.1	Gm22499	-0.370337	0.897134	1.141	0.667374	2.94455	-1.51134	5	0	0	0	-0.345471	0.802569	0.485246	-0.407208	0.757203	-1.19428	0.555238	1.5063	-0.414731	-0.659521	-0.46985	-1.9906	-1.35245	-1.07337	0.260511	-0.496145	0.61356	0.899974	0.627624	1.89541
36886	TC0X00001706.mm.1	---	-0.526741	0.568736	0.984464	0.421887	4.65177	-1.5112	5	0	0	0	-1.47666	-0.682441	0.306602	1.88895	1.84796	-0.780409	-0.0356468	-0.849576	-0.167672	-0.243856	-0.857227	-0.565927	-0.647868	-0.442966	0.759615	0.455806	-1.46207	0.837733	0.655535	1.46012
35193	TC0M00000017.mm.1	mt-Tt	-0.184092	0.849668	1.32318	0.408112	3.78416	-1.50727	7	0	0	0	0.51734	0.169241	-0.195091	-0.205317	0.576191	-1.45566	0.709473	-1.46313	-0.614603	0.0397186	-1.8534	0.64815	-1.21196	-0.650222	0.174645	-0.422815	1.26788	1.53745	1.57953	0.852561
27079	TC0700003092.mm.1	Gm27921	-0.575076	0.788882	0.93199	0.301793	4.36392	-1.50707	7	0	0	0	-1.61669	-0.583325	-0.301211	0.553453	1.74855	-1.83051	-1.11283	0.474188	-1.58842	0.548448	-0.419823	-0.064506	-0.199011	0.301033	-0.313854	0.323222	1.28532	0.686076	1.26878	0.841116
22081	TC0600001667.mm.1	Gm10400 // Gm10400	-0.926759	0.642272	0.579063	0.550265	3.76619	-1.50582	4	0	0	0	-1.42109	-0.766498	0.20611	2.02147	1.59177	0.102073	-0.275611	0.841536	-1.87998	-0.90909	-0.899277	-0.817489	-0.256432	0.312915	0.512055	0.676725	-0.776374	0.763455	1.01345	-0.0397167
31226	TC0800002613.mm.1	---	-1.03516	0.448031	0.469685	0.379877	5.4309	-1.50484	4	0	0	0	-1.40567	-1.03816	-1.70233	1.55771	1.29445	0.835213	0.558488	0.167733	-0.414075	-0.84699	-0.624431	-1.21444	-0.144837	0.047748	1.35518	-0.996956	1.16231	0.0980898	0.453631	0.857336
30440	TC0800001822.mm.1	Gm15319 // Gm15319 // Gm15319	-0.311557	1.26586	1.19195	0.533624	2.64208	-1.50351	7	0	0	0	0.630552	-0.16392	0.166729	-0.295942	0.0167182	-0.777368	0.139187	-0.317393	0.68268	0.483707	-2.77097	-1.20968	-0.263881	-0.426839	-0.230116	-0.730522	1.4912	0.743974	1.78233	1.04955
42226	TC1000003092.mm.1	---	-0.628007	0.317466	0.870352	0.527965	4.57392	-1.49836	2	0	0	0	-0.708263	-0.541478	-0.843273	1.78885	0.89966	-1.45386	2.15706	0.194964	-0.485265	-0.224076	-0.407045	-1.18665	-0.849441	-0.93248	0.128578	0.357047	-0.505396	1.33619	0.296855	0.978013
131	TC0100000133.mm.1	Tmem14a // Tmem14a // Tmem14a // Tmem14a // Tmem14a // Tmem14a // Tmem14a // Tmem14a	-0.266526	0.489261	1.23143	0.102674	7.71379	-1.49796	7	0	0	0	0.183239	-0.191986	-0.290001	0.408038	0.568014	1.15448	-0.242261	1.36789	-0.628015	0.363901	-1.10056	-0.202257	-2.0055	0.103394	-0.302638	-1.92621	-0.953818	1.11724	1.26092	1.31613
46329	TC1100003997.mm.1	Abca8b // Abca8b // Abca8b // Abca8b // Abca8b // Abca8b // Abca8b // Abca8b // Abca8b // Abca8b	-0.87298	0.819433	0.624034	0.0895264	4.76756	-1.49701	6	0	0	0	-0.582461	0.103687	-0.368099	2.0087	1.11228	0.213196	-0.200104	0.503487	-0.307048	-1.21	-2.26065	-1.48629	-1.06672	0.570794	0.109237	1.15637	-0.168478	0.717225	0.616191	0.538688
36001	TC0X00000808.mm.1	Dmd // Dmd // Dmd // Dmd // Dmd // Dmd // Dmd // Dmd // Dmd // Dmd // Dmd // Dmd // Dmd // Dmd // Dmd // Dmd // Dmd // Dmd // Dmd // Dmd // Dmd // Dmd // Dmd // Dmd // Dmd // Dmd // Dmd // Dmd // Dmd // Dmd // Dmd // Dmd // Dmd // Dmd // Dmd // Dmd	-0.411764	0.482067	1.08505	0.508635	4.33115	-1.49682	3	0	0	0	-0.431945	-0.983027	-0.15068	2.10124	1.6017	-0.187698	0.11039	0.165623	-0.030836	-0.186622	-1.16833	0.0690961	-1.12039	-1.22992	-0.158316	-0.0692508	-1.58619	1.21682	0.523498	1.51483
29169	TC0800000538.mm.1	Acsl1 // Acsl1 // Acsl1 // Acsl1 // Acsl1 // Acsl1 // Acsl1 // Acsl1 // Acsl1 // Acsl1 // Acsl1 // Acsl1 // Acsl1 // Acsl1 // Acsl1 // Acsl1 // Acsl1 // Acsl1 // Acsl1	-0.581597	0.478419	0.915075	0.812823	2.97599	-1.49667	2	0	0	0	-0.832413	-1.14973	-0.299569	-0.0745391	0.0854505	-0.39841	-0.284922	0.133848	-0.0916794	0.0123874	-1.14289	-0.567294	2.96608	0.624375	-0.119191	-0.227906	-1.37883	1.8167	0.690075	0.238454
33072	TC0900001226.mm.1	---	-0.717696	0.438992	0.778205	0.795335	3.06383	-1.4959	2	0	0	0	-0.571426	-0.301008	-0.26941	0.231445	1.37396	0.269044	-1.77577	0.594005	-1.55614	-0.947562	-0.651426	-0.726902	-1.13347	0.53285	0.973241	1.76113	-0.137171	-0.000361	1.58931	0.745665
59952	TC1700000644.mm.1	Tnxb // Tnxb // Tnxb // Tnxb // Tnxb // Tnxb // Tnxb // Tnxb	-0.584774	0.584904	0.905921	0.693097	3.26073	-1.4907	3	0	0	0	-0.78248	-0.78108	-0.229358	2.50852	1.41503	-0.396808	-0.220334	0.537292	-0.255271	-0.168013	-1.7498	-0.127416	-0.784759	-0.623172	0.233608	-0.174921	-1.1188	0.245762	0.844177	1.62782
41093	TC1000001955.mm.1	Tpd52l1 // Tpd52l1 // Tpd52l1 // Tpd52l1 // Tpd52l1 // Tpd52l1 // Tpd52l1 // Tpd52l1 // Tpd52l1 // Tpd52l1	-0.565961	0.704827	0.92357	0.620156	3.33765	-1.48953	4	0	0	0	-0.451281	-1.49263	-0.387321	0.397071	0.867722	0.424637	2.57811	0.0247601	0.203399	-1.5677	0.0979724	-0.364173	-1.13777	-0.392212	-0.115909	-0.419546	-1.03585	1.21211	0.211715	1.34688
28620	TC0700004652.mm.1	Snrpn // Snrpn // Snrpn // Snurf // Snrpn // Snrpn // Snrpn // Snrpn // Snurf // Snurf // Snrpn // Snrpn // Snrpn // Snurf // Snrpn // Snurf // Snrpn // Snrpn // Snrpn	-0.488773	0.675215	0.999493	0.287282	4.88966	-1.48827	7	0	0	0	0.268858	-0.479598	-0.324155	1.20054	1.6939	0.57092	-0.342334	0.562398	0.294652	-1.2201	-1.48156	-0.479506	-1.09028	-1.6762	1.04241	-0.554962	-0.983467	0.668658	1.18593	1.14389
17298	TC0500000578.mm.1	---	-0.430211	0.927812	1.04543	0.126548	4.11947	-1.47564	6	0	0	0	0.6302	-0.109235	-1.13178	0.530038	0.899477	0.32894	-2.06751	-0.187315	0.168503	-0.254718	-2.15696	-0.157483	-0.410026	0.57995	0.548082	1.02175	-1.36819	1.12461	1.11219	0.899477
21091	TC0600000668.mm.1	---	-0.575962	0.900156	0.896295	0.3163	3.81277	-1.47226	7	0	0	0	0.143873	-0.20091	0.336802	-0.447413	0.1114	0.577694	0.772519	1.84502	-0.274451	-1.67189	-0.3635	-2.00166	-0.480295	0.0704297	-1.94687	0.0461548	0.794206	0.823563	0.622696	1.24263
33795	TC0900001957.mm.1	---	-0.748309	0.586195	0.723003	0.0552087	6.57299	-1.47131	6	0	0	0	-0.0572899	-0.534261	-0.878876	0.394177	0.45691	-0.404394	0.180744	-0.309344	-1.78964	-0.136392	-0.95972	-0.881987	-1.46623	1.19692	2.21582	1.3953	-0.590746	0.680633	0.702937	0.785438
23062	TC0600002655.mm.1	---	-0.660707	0.637118	0.80998	0.302476	4.94406	-1.47069	7	0	0	0	-1.67818	-1.08885	-0.118642	0.132804	0.313152	-0.319198	-0.107075	0.006014	-0.650179	-0.259947	0.151663	-0.98082	-0.476257	3.19802	0.0976354	0.151115	-0.801203	0.554419	1.14394	0.731585
64589	TC1900000747.mm.1	---	-0.530818	0.632114	0.938081	0.444922	4.18718	-1.4689	5	0	0	0	-0.681984	-1.01198	-1.35917	-0.305231	0.060924	-0.20723	1.21782	-0.410966	-0.590845	0.349739	0.275568	-0.69705	0.350303	-0.709317	-1.17744	2.71786	-0.635244	1.01611	0.459307	1.33883
57459	TC1600000303.mm.1	1300002E11Rik // 1300002E11Rik // 1300002E11Rik // 1300002E11Rik // 1300002E11Rik // 1300002E11Rik // 1300002E11Rik	-0.466038	0.469174	0.999107	0.376228	5.22504	-1.46514	4	0	0	0	-0.408268	-0.705404	-1.16348	2.46219	1.19177	0.862132	0.234645	-0.536706	0.0418099	0.168126	-0.796311	-0.398737	-0.5013	-1.67944	-0.488866	-0.337439	-0.942043	0.784591	0.779204	1.43353
64454	TC1900000610.mm.1	Marveld1 // Marveld1 // Marveld1 // Marveld1 // Marveld1 // Marveld1 // Marveld1 // Marveld1	-0.788659	0.639477	0.675052	0.35344	4.6273	-1.46371	6	0	0	0	-0.921948	-1.67681	0.192536	1.32067	2.27661	-0.254074	0.908138	0.649497	-0.863247	-1.32672	-0.758894	-0.165523	-0.727435	0.483248	-0.462441	0.397865	-1.09662	0.791472	0.278088	0.955596
44952	TC1100002614.mm.1	Sgcd // Sgcd // Sgcd // Sgcd // Sgcd // Sgcd // Sgcd // Sgcd // Sgcd // Sgcd // Sgcd // Sgcd // Sgcd	-0.454182	0.451193	1.00917	0.268504	6.3496	-1.46335	6	0	0	0	-0.420615	0.224899	-0.82451	1.5526	1.12359	0.287472	-0.288751	-0.448363	-0.0748293	-0.778253	-1.03642	-0.26954	-1.11964	-1.42974	0.487458	1.66084	-1.67371	0.873718	0.835375	1.31842
35189	TC0M00000013.mm.1	ND4 // ND4L	-0.447367	1.12654	1.01314	0.18841	3.32336	-1.46051	6	0	0	0	-1.78372	-1.69675	-0.108335	1.09897	1.12835	0.262304	0.259762	-1.03721	0.68515	-1.32844	0.322861	0.777667	-0.181518	0.811034	-0.679367	-0.170252	-1.39993	0.902512	0.906229	1.23069
30634	TC0800002018.mm.1	---	-0.37999	0.901574	1.07896	0.219338	4.01326	-1.45895	7	0	0	0	-2.0579	0.188233	0.206623	1.10347	0.870508	1.0238	-1.1268	0.641403	0.370219	-0.435403	-1.10381	0.172116	0.280568	-0.141532	-0.319491	-1.0144	-1.89448	0.857941	1.08236	1.29658
25487	TC0700001483.mm.1	Olfr592 // Olfr592 // Olfr592 // Olfr592 // Olfr592 // Olfr592	-0.646776	0.451454	0.808404	0.577136	3.88713	-1.45518	3	0	0	0	-0.552426	-0.369229	-0.824762	1.59236	0.484199	1.48213	-1.04246	-0.669306	-0.680478	-0.243838	-0.302572	-1.55412	-0.879662	-0.766121	1.82271	-0.680061	0.758429	0.373596	1.46318	0.588438
2196	TC0100002220.mm.1	---	-0.583026	0.748482	0.871702	0.117458	5.00054	-1.45473	6	0	0	0	-0.0615936	-0.217111	0.364908	1.87863	1.31344	-1.09516	0.194463	-0.350482	-0.470766	-0.52458	-1.46567	-1.70638	-0.656535	-1.25285	1.52729	-0.0426473	-0.0500767	0.911169	0.964345	0.739593
65574	TC1900001739.mm.1	Rab11fip2 // Rab11fip2 // Rab11fip2 // Rab11fip2 // Rab11fip2 // Rab11fip2 // Rab11fip2 // Rab11fip2 // Rab11fip2 // Rab11fip2 // Rab11fip2 // Rab11fip2 // Rab11fip2 // Rab11fip2	-0.966859	0.36531	0.487116	0.297866	6.59271	-1.45398	4	0	0	0	-0.486527	-1.19463	-0.894879	1.71369	2.20153	0.374559	-0.179728	0.503112	-0.664709	-1.61518	-0.932817	-0.979276	-0.307795	-0.572161	0.0387547	1.45866	0.0760432	0.143217	0.663977	0.654155
15510	TC0400003005.mm.1	Mrpl48-ps	-0.465619	0.764406	0.985908	0.49941	3.5561	-1.45153	6	0	0	0	-0.900424	-0.427362	-1.23632	-0.561658	1.3282	0.0804384	1.92544	0.219861	-1.12417	1.01496	-0.427173	-0.158832	1.04383	-0.891564	-1.00225	-0.658707	-1.18198	1.11043	0.43602	1.41128
30961	TC0800002347.mm.1	Gm21807	-0.740093	0.874142	0.707617	0.277726	3.94205	-1.44771	7	0	0	0	-0.653041	0.358224	-1.811	1.02472	0.704277	0.513205	0.232005	-0.631818	0.153242	-0.710158	-0.593139	-1.92478	0.550443	-1.92609	1.23581	0.99686	0.358387	0.797067	0.396189	0.929596
14808	TC0400002299.mm.1	---	-0.73684	0.668388	0.709858	0.573899	3.47212	-1.4467	4	0	0	0	0.122036	-0.791809	-1.46595	-0.776118	-0.335325	1.29194	-0.818034	-0.999478	-0.396774	-0.649112	-0.227045	-1.74923	0.753907	0.269088	2.11336	0.66302	0.865943	0.32772	1.3698	0.432059
39775	TC1000000624.mm.1	---	-0.874309	0.904551	0.57055	0.237991	3.92128	-1.44486	7	0	0	0	0.0657634	-0.0441628	-1.17721	0.617268	0.843081	0.446854	1.13856	1.26612	-2.57557	-0.335566	-1.10937	-0.944046	-1.47163	0.380805	1.01033	0.325143	-0.148007	0.842131	0.471128	0.398391
22143	TC0600001729.mm.1	Sspn // Sspn // Sspn // Sspn // Sspn // Sspn // Sspn // Sspn // Sspn // Sspn	-0.478264	0.716727	0.965365	0.425117	3.9492	-1.44363	6	0	0	0	-1.70055	-0.347281	0.413339	1.79688	0.87429	0.219618	-0.958093	1.8313	-1.17292	-0.275343	-0.050954	-0.214138	-0.586286	-1.01983	-0.00788795	-0.747656	-0.950586	0.79469	0.652109	1.4493
49783	TC1300000534.mm.1	Cap2 // Cap2 // Cap2 // Cap2 // Cap2 // Cap2 // Cap2 // Cap2 // Cap2 // Cap2 // Cap2 // Cap2 // Cap2	-0.436475	0.446939	1.00647	0.927892	2.56879	-1.44294	2	0	0	0	-0.610515	-1.06596	-0.145224	1.58425	2.19587	-0.218718	0.0271677	0.107899	0.0233105	-0.0193822	-0.9618	-0.27576	-1.19929	-1.05139	0.30051	-0.524777	-1.1856	1.46859	-0.0617414	1.61255
15645	TC0400003141.mm.1	---	-0.46507	0.909176	0.974144	0.271155	3.81131	-1.43921	7	0	0	0	-1.44095	-0.610238	1.01984	1.28255	1.07949	1.20381	-0.52022	-1.77942	0.139387	-0.325945	-1.6446	-0.392985	-0.411453	-0.0894318	0.604161	0.0968853	-1.13331	0.714382	1.25541	0.952641
22450	TC0600002038.mm.1	Gm22321	-0.388616	0.853151	1.04999	0.412199	3.5896	-1.4386	7	0	0	0	0.628631	-0.120662	-0.443714	-0.874672	-0.309496	0.122427	1.17777	-0.826579	-1.98043	-0.144779	0.243593	-0.902947	-0.846013	-0.743374	2.09136	0.700527	-0.9216	0.817322	0.806726	1.52591
37069	TC0X00001892.mm.1	Maob // Maob // Maob // Maob // Maob // Maob // Maob // Maob // Maob // Maob // Maob // Maob // Maob	-0.822424	0.535444	0.615115	0.0341849	7.06967	-1.43754	6	0	0	0	-0.999284	-0.502543	-0.67062	2.821	1.24028	-0.102505	0.613622	0.132372	-0.26471	-0.425764	-1.84384	-1.05021	0.270172	-1.09586	0.380915	-0.0577479	-0.290623	0.587803	0.653452	0.604091
18405	TC0500001693.mm.1	Mir7038	-0.396097	0.632968	1.04113	0.341711	4.63482	-1.43722	7	0	0	0	-1.41351	-0.135643	-0.517083	1.13302	0.956501	-0.0936404	2.00902	-1.32683	0.494529	-0.586515	0.162355	-0.776806	-0.812534	-0.726826	-1.38843	0.615503	-0.716492	0.68579	1.36735	1.07025
20404	TC0500003718.mm.1	4930449I24Rik // 4930449I24Rik // 4930449I24Rik // 4930449I24Rik // 4930449I24Rik // 4930449I24Rik	-0.33158	0.606474	1.10333	0.149295	5.85926	-1.43491	7	0	0	0	-0.0754414	-0.51806	0.550691	-0.445228	-0.325993	1.15974	-1.45569	2.28051	-0.759428	0.298023	-1.1123	-0.704546	0.162983	0.606291	-0.967006	-0.903828	-1.1007	1.21837	1.157	0.934617
57108	TC1500002301.mm.1	Calcoco1 // Calcoco1 // Calcoco1 // Calcoco1 // Calcoco1 // Calcoco1 // Calcoco1 // Calcoco1 // Calcoco1 // Calcoco1 // Calcoco1 // Calcoco1 // Calcoco1	-0.605735	1.01597	0.823438	0.578075	2.80907	-1.42917	6	0	0	0	-0.132021	-0.567197	0.837945	1.21592	-0.18443	-0.198979	0.10344	0.42881	-0.387354	-2.55771	-0.732687	-0.701118	-1.5915	1.31666	-0.0885312	1.16514	-0.396694	1.25632	0.166961	1.04704
22430	TC0600002018.mm.1	---	-0.677667	0.723228	0.751391	0.388166	4.04284	-1.42906	7	0	0	0	-0.0239733	-1.82504	0.428257	1.29602	2.24081	-0.532751	0.787307	1.11815	-0.992555	-0.618051	-0.906599	-0.805715	-0.381907	-0.171278	-0.13185	-1.09042	-0.644577	0.45022	0.614495	1.18946
6332	TC0200002510.mm.1	---	-0.530099	0.537294	0.89736	0.441432	4.38038	-1.42746	4	0	0	0	-0.738776	-1.46892	-0.338952	0.259921	1.53547	-0.404873	-0.216689	0.985532	-0.47034	-0.0169409	-0.802179	0.12542	0.523043	0.620654	-1.94694	1.3114	-1.64891	1.4027	0.702442	0.586937
4516	TC0200000682.mm.1	Olfr366 // Olfr366 // Olfr366 // Olfr366 // Olfr366 // Olfr366	-0.230509	0.75827	1.19574	0.522025	3.42927	-1.42624	5	0	0	0	0.238611	0.174737	-0.0822097	-0.225648	-0.137599	0.386542	0.518502	-0.485133	0.583264	-0.535153	-0.24964	-1.74317	-0.201682	-1.48762	-1.8001	1.96685	-0.50775	0.593271	1.48002	1.51392
64899	TC1900001058.mm.1	Gm24951	-0.560152	0.600912	0.861711	0.164611	5.7751	-1.42186	7	0	0	0	-0.961239	-0.903483	-1.34128	0.872089	0.953203	2.50943	-0.973192	-0.663357	-0.748478	0.225116	0.215918	-0.407619	-0.667736	0.870746	-1.14585	-0.655049	0.23564	0.945419	0.672069	0.967646
61898	TC1700002614.mm.1	Rpl31-ps25	-0.58685	0.876574	0.830167	0.408544	3.48418	-1.41702	7	0	0	0	-1.69334	-1.4864	-0.40615	0.420849	1.56304	1.31627	0.549425	0.967876	-0.0823965	-1.21007	0.309354	0.461045	-0.096216	-0.120453	-0.553799	-1.80824	-0.621305	1.17787	0.38021	0.932415
4067	TC0200000226.mm.1	LOC100862047	-0.369357	0.622566	1.04643	0.376787	4.41802	-1.41579	6	0	0	0	-0.216104	-0.887663	0.595499	-1.0926	0.514818	1.72694	0.383502	1.36833	-0.334851	-1.36743	-0.0479126	-0.32704	-0.670738	0.750998	-0.600753	-1.39582	-1.53847	0.667705	1.42125	1.05033
57162	TC1600000002.mm.1	---	-0.519298	0.899979	0.895982	0.417038	3.39598	-1.41528	7	0	0	0	0.671257	0.00240073	0.100807	0.017306	-0.0811494	-0.625972	-0.639321	1.38913	-0.797999	-1.68256	-1.65674	-0.272258	-0.95429	-0.304019	0.954984	-0.84273	2.0332	0.596182	1.37224	0.719522
12917	TC0400000395.mm.1	Ccl19 // Gm2457 // Ccl19	-0.8279	0.576267	0.586681	0.226633	5.56726	-1.41458	7	0	0	0	-1.15586	0.0684842	-0.715478	1.41073	1.07994	0.148304	-0.859885	1.77033	-0.249691	-0.998189	-1.13483	-1.60974	-0.340363	-1.20837	0.200007	0.315818	1.51875	0.368085	0.820576	0.571381
11676	TC0300002395.mm.1	---	-0.574206	0.741276	0.839036	0.522227	3.43362	-1.41324	5	0	0	0	-0.263783	-0.337105	-0.0197049	0.598731	0.132825	0.60436	-0.97047	-1.43444	-0.903929	-0.717476	0.231502	-2.00895	-0.310007	-0.976545	1.22497	2.01663	0.616277	1.43266	0.634044	0.450406
30247	TC0800001627.mm.1	Cd209f // Cd209f // Cd209f // Cd209f // Cd209f // Cd209f // Cd209f // Cd209f // Cd209f // Cd209f // Cd209f // Cd209f	-0.763282	0.817635	0.646619	0.431798	3.55088	-1.4099	7	0	0	0	-0.230665	0.470399	-0.392009	1.37857	0.813634	0.800587	0.7428	1.50146	-1.84727	-1.20174	-1.57642	-0.565268	-1.23011	-1.12336	0.150323	0.636268	-0.267056	0.154654	0.962796	0.822407
51177	TC1300001935.mm.1	---	-0.391371	0.977452	1.00982	0.162522	3.676	-1.40119	6	0	0	0	-0.357654	-0.239826	0.98823	0.541511	1.3163	1.16827	-1.23226	-0.857309	-0.784246	0.394863	-0.623741	-2.11722	-0.194882	-1.69774	-0.18611	0.180278	0.672091	0.822193	1.10701	1.10025
14736	TC0400002227.mm.1	Gm23162	-0.817853	0.871746	0.582379	0.528213	3.11882	-1.40023	6	0	0	0	0.66385	-1.13282	-0.984428	0.958144	0.941712	0.020954	0.660038	0.833217	-0.442301	-2.25182	-0.927008	-0.650435	-1.81041	0.44394	0.212796	1.21417	0.503273	-0.0215685	0.810561	0.958144
25921	TC0700001922.mm.1	Acadsb // Acadsb // Acadsb // Acadsb // Acadsb // Acadsb // Acadsb // Acadsb // Acadsb // Acadsb // Acadsb // Acadsb // Acadsb // Acadsb // Acadsb // Acadsb // Acadsb // Acadsb // Acadsb // Acadsb // Acadsb	-0.467107	0.570332	0.933112	0.257795	5.34524	-1.40022	7	0	0	0	-1.41092	-0.663909	-0.102328	2.94404	0.689351	-0.259834	0.278004	-0.12616	0.284377	-0.0526169	-0.857694	-0.466657	0.009474	-0.793405	-0.822404	0.0231631	-1.47181	0.838506	0.735986	1.22484
4886	TC0200001052.mm.1	---	-0.628229	0.766243	0.771395	0.342375	3.99161	-1.39962	7	0	0	0	-0.564413	-0.522242	0.62663	1.98301	1.66649	-0.0804649	-0.605262	-0.089831	-0.217974	-0.812953	-1.02391	-1.88274	-1.19269	-0.754428	0.473532	-0.418519	1.10158	1.16574	0.598453	0.549988
9838	TC0300000529.mm.1	Mir8120	-0.964683	0.808952	0.434424	0.142935	4.41782	-1.39911	6	0	0	0	-0.0759219	-1.14303	0.0422968	0.573607	0.895564	0.324692	0.659862	-0.681257	-0.881768	-2.32888	-1.43544	-0.930041	-0.227548	0.866669	1.38582	1.75561	-0.103504	0.575004	0.289245	0.439022
61476	TC1700002190.mm.1	Ptcra // Ptcra // Ptcra // Ptcra // Ptcra // Ptcra	-0.383303	1.06567	1.01502	0.156975	3.38697	-1.39833	6	0	0	0	-2.26043	-0.91336	0.980111	1.29951	0.941585	-1.52489	-0.625681	-0.429323	-0.595741	0.53656	0.103114	-0.53337	0.388864	-0.0174596	-0.716465	1.11608	-0.794167	0.834611	1.12039	1.09007
952	TC0100000965.mm.1	Gm26078	-0.465963	1.21369	0.928534	0.277911	2.86943	-1.3945	7	0	0	0	0.54105	-0.675548	0.591043	0.302872	-0.190546	0.113847	0.553482	0.667942	-0.161598	-2.90839	0.20721	-0.855505	-1.91615	0.70284	0.683054	0.152172	-0.593382	0.630498	1.18058	0.974519
3076	TC0100003113.mm.1	Ppp1r12b // Ppp1r12b // Ppp1r12b // Ppp1r12b // Ppp1r12b // Ppp1r12b // Ppp1r12b // Ppp1r12b // Ppp1r12b // Ppp1r12b // Ppp1r12b // Ppp1r12b // Ppp1r12b // Ppp1r12b // Ppp1r12b // Ppp1r12b // Ppp1r12b // Ppp1r12b // Ppp1r12b // Ppp1r12b // Ppp1r12b // Ppp1r12b // Ppp1r12b // Ppp1r12b // Ppp1r12b	-0.451333	0.431416	0.940168	0.511202	4.12674	-1.3915	3	0	0	0	-0.14088	-0.34929	-0.349949	1.54191	1.63787	0.842071	1.24117	-0.207273	-0.924167	-0.496271	-1.0715	0.172726	-0.796798	-1.16945	-0.272365	-0.613591	-1.86471	1.51239	0.528575	0.779534
4270	TC0200000431.mm.1	Obp2a // Obp2a // Obp2a // Obp2a // Obp2a // Obp2a	-0.476943	0.52596	0.911935	0.520666	3.85378	-1.38888	3	0	0	0	0.108318	-0.744345	-0.857129	-0.813817	2.12169	0.191008	-0.996301	1.12012	-0.664534	-0.315599	0.287094	-1.15241	0.282685	-1.81942	-0.0200162	1.19806	-0.661215	1.07398	1.33231	0.329516
50263	TC1300001019.mm.1	---	-0.91773	0.356453	0.469637	0.666891	3.40107	-1.38737	2	0	0	0	-0.21434	-1.17685	-1.25207	-0.303911	1.52052	1.99263	0.23443	0.624511	-0.925938	-0.955068	-0.743603	-1.15624	-0.393156	0.0113306	-0.397694	-0.177807	1.90434	-0.274297	1.01384	0.669367
49694	TC1300000445.mm.1	Bmp6 // Bmp6 // Bmp6 // Bmp6 // Bmp6 // Bmp6	-0.502233	0.900199	0.883713	0.485645	3.14353	-1.38595	7	0	0	0	0.0933863	-0.587302	-0.377516	2.31867	1.21325	0.704636	-0.119113	-0.0287705	0.181348	0.260984	-2.33929	-0.747245	-0.451374	-0.732739	-0.894659	-0.551849	-0.593554	0.619477	0.58748	1.44418
24903	TC0700000896.mm.1	Nav2 // Nav2 // Nav2 // Nav2 // Nav2 // Nav2 // Nav2 // Nav2 // Nav2 // Nav2 // Nav2 // Nav2 // Nav2 // Nav2 // Nav2 // Nav2 // Nav2 // Nav2 // Nav2 // Nav2 // Nav2 // Nav2 // Nav2 // Nav2 // Nav2 // Nav2 // Nav2 // Nav2 // Nav2 // Nav2 // Nav2 // Nav2 // Nav2 // Nav2 // Nav2 // Nav2 // Nav2 // Gm2788 // Gm2788 // Nav2 // Nav2 // Nav2 // Nav2 // Nav2 // Nav2	-0.436026	0.67471	0.947842	0.327319	4.35994	-1.38387	7	0	0	0	-0.602509	-0.814276	-0.251692	0.893051	-0.038115	-0.280827	-1.63872	1.00866	-0.820891	0.958517	-1.09456	-0.426766	1.91554	-0.987398	0.0761983	0.753521	-1.49325	1.2551	0.6036	0.984829
18899	TC0500002192.mm.1	---	-0.394354	0.778463	0.988519	0.236003	4.26484	-1.38287	7	0	0	0	-0.176948	-0.554913	0.460857	-0.0302337	0.323712	-1.14799	-0.303233	-1.39349	-0.670946	0.632416	-0.825892	-1.62505	1.55609	-1.34617	-0.0706201	1.84552	0.361334	1.19879	1.03351	0.733258
1057	TC0100001072.mm.1	Gm19295	-0.613185	0.387156	0.769039	0.557213	3.91096	-1.38222	2	0	0	0	-0.504148	-0.661643	-0.231292	0.475686	0.880224	1.98801	1.31316	-2.11114	-1.31701	-0.875271	-0.213257	-0.489673	-0.149202	0.176288	-1.20967	-0.0274098	0.649235	0.168969	0.868018	1.27013
8554	TC0200004751.mm.1	Banf2os // Banf2os // RP23-17O9.3 // RP23-17O9.3	-0.299898	0.697274	1.07874	0.313829	4.31066	-1.37864	7	0	0	0	-0.0444212	0.634877	0.216172	-0.0677416	-0.777529	1.38726	-0.985527	-0.148561	-0.369264	-0.564619	-0.396383	-1.57565	-1.22195	-0.00987679	-1.73017	1.85286	0.564299	0.989731	0.819033	1.42746
5148	TC0200001316.mm.1	Olfr1169-ps1	-0.193743	0.690921	1.1791	0.106826	5.11627	-1.37284	6	0	0	0	0.520292	0.391047	-0.234094	-0.594138	0.0773675	-0.186969	-0.287732	-1.29825	0.00482274	0.144516	-0.741121	-1.44166	-1.58245	-0.211778	2.06745	-1.23995	1.07536	1.28557	1.1798	1.07192
1790	TC0100001810.mm.1	---	-0.469858	0.911503	0.90096	0.25819	3.65179	-1.37082	7	0	0	0	-1.439	0.80251	-1.7477	0.42726	0.723047	-0.854437	1.63005	0.783969	-0.695209	0.307515	-0.416072	-0.101057	-1.33874	-0.360349	0.817493	0.336032	-1.5782	0.630192	1.1444	0.928289
18639	TC0500001930.mm.1	---	-0.442067	0.595758	0.918574	0.306726	4.74971	-1.36064	7	0	0	0	-0.653263	-0.628389	0.188326	-0.101705	0.156511	-0.244522	0.178568	1.15024	-0.533285	-1.01523	0.555642	-1.00827	-1.62354	1.86195	-1.20928	1.45525	-1.28473	0.853059	1.25276	0.6499
31261	TC0800002648.mm.1	Zfp423 // Zfp423 // Zfp423 // Zfp423 // Zfp423 // Zfp423 // Zfp423 // Zfp423 // Zfp423 // Zfp423 // Zfp423 // Zfp423 // Zfp423 // Zfp423 // Zfp423 // Zfp423 // Zfp423 // Zfp423 // Zfp423	-0.427315	0.88647	0.930868	0.318443	3.55376	-1.35818	7	0	0	0	-0.310299	0.0759205	0.103314	1.5965	1.46892	-0.824155	0.0233789	-0.18088	0.28887	0.046124	-2.18511	-1.01002	-0.999363	-0.668449	-0.322773	1.32356	-1.21815	1.28568	0.66986	0.83707
1862	TC0100001883.mm.1	A330023F24Rik // Mir29c // Mir29b-2 // A330023F24Rik // Mir29c // Mir29b-2 // A330023F24Rik // A330023F24Rik // Mir29b-2 // Mir29c	-0.674899	0.78494	0.677474	0.291518	3.96479	-1.35237	7	0	0	0	-0.435015	-0.43127	0.189139	1.64075	1.83816	1.02948	0.138337	1.00253	-0.309301	-1.37303	-2.10359	-0.26123	-0.261145	-0.556864	-0.133711	-0.950447	-1.05521	0.725989	0.941691	0.364743
45209	TC1100002872.mm.1	---	-0.783631	0.628674	0.567309	0.25591	4.82813	-1.35094	7	0	0	0	-1.95068	-0.66324	-1.05782	2.37182	1.01608	-0.238376	1.05332	-0.094131	-0.380843	0.0262379	-0.948309	-0.51076	0.24813	1.07873	0.307529	-0.696418	-1.26319	0.616278	0.795195	0.290453
62131	TC1800000024.mm.1	---	-0.532543	0.722527	0.815387	0.191294	4.57581	-1.34793	7	0	0	0	-1.5448	-1.33593	0.379522	2.3061	1.90659	-0.317644	-0.871547	-0.0850337	-0.0219384	0.000888	-0.796665	-0.408883	-0.723591	0.126218	-0.0820669	0.207717	-1.1851	0.868209	0.603232	0.97472
35183	TC0M00000007.mm.1	COX2	-0.374938	0.99454	0.97205	0.222503	3.39082	-1.34699	7	0	0	0	-2.12716	-1.24498	-0.0177133	0.928447	1.25593	-0.582019	0.524312	0.110759	0.0341592	-0.198131	0.033689	0.895568	-0.463954	1.29004	-1.03367	-0.691729	-1.6297	1.02532	0.727747	1.16308
63065	TC1800000967.mm.1	Gm23637	-0.451747	0.324995	0.895167	0.159603	8.77139	-1.34691	7	0	0	0	-0.203735	-0.453198	-0.0611931	0.783414	0.992836	1.93487	1.22163	-0.71273	-0.547434	-1.04041	-0.250796	-0.605463	-0.969631	0.15988	-2.1672	-1.15231	0.385961	0.725902	0.91667	1.04293
60021	TC1700000716.mm.1	Gm20508 // RP24-443D19.10	-0.679403	0.669171	0.661578	0.213109	4.76772	-1.34098	7	0	0	0	0.59849	-0.840924	-0.739917	0.385245	1.45762	-0.413702	1.55323	0.695056	-1.09521	-1.00361	-0.247372	-1.42728	-1.49663	-1.03428	1.09605	-0.654394	1.18288	0.426631	0.715686	0.842417
15859	TC0400003357.mm.1	Urod // Urod // Urod // Urod // Urod // Urod // Urod // Urod // Urod // Urod // Urod // Urod // Urod // Urod // Urod // Urod // Urod // Urod // Urod // Urod // Urod // Urod // Urod // Urod // Urod	-0.667009	0.846614	0.673917	0.224124	3.88491	-1.34093	7	0	0	0	-0.562902	0.0048675	0.322672	1.02085	0.995928	-0.796715	-0.104149	1.65209	-1.76246	-1.86053	-0.184719	-0.625983	-0.253647	-1.71487	0.270274	1.23076	0.346796	0.639205	0.469175	0.913372
41638	TC1000002502.mm.1	---	-0.589723	0.803904	0.750676	0.237629	4.02057	-1.3404	7	0	0	0	0.43222	-0.0254219	-0.133352	0.615713	1.69837	-0.199202	1.26135	1.58841	-0.569385	-2.04362	-0.952476	-0.83602	-1.39373	-0.989688	0.192878	-0.677944	-0.220127	0.758099	0.984506	0.509422
40086	TC1000000938.mm.1	---	-0.659662	0.877794	0.674712	0.183249	3.83182	-1.33437	7	0	0	0	-2.49889	-0.417817	0.0409933	0.87622	0.985121	0.650925	-1.76383	0.6495	-0.102002	-0.455013	-0.186818	-0.99809	-0.0790824	1.19664	-1.3305	0.740824	0.66768	0.510951	0.87264	0.640546
17352	TC0500000633.mm.1	Gm25952	-0.553276	0.662784	0.780926	0.528979	3.3777	-1.3342	4	0	0	0	-1.28073	-1.48647	-0.263941	1.18282	1.13225	-0.236006	-0.157798	-2.71022	0.174368	-0.813055	0.169443	-0.372542	0.724885	0.52613	-0.207153	0.454491	0.820749	0.347729	1.37045	0.624599
23858	TC0600003460.mm.1	Tmtc1 // Tmtc1 // Tmtc1 // Tmtc1 // Tmtc1 // Tmtc1 // Tmtc1 // Tmtc1 // Tmtc1 // Tmtc1 // Tmtc1	-0.603822	1.05763	0.730039	0.386295	2.91393	-1.33386	7	0	0	0	-1.43878	-0.316569	0.0864295	1.53645	0.973532	-0.477523	0.166467	0.213738	-0.0613971	0.109465	-2.65846	0.052551	1.11502	0.686629	-0.572565	-0.132316	-1.47279	0.807574	0.310858	1.07169
23569	TC0600003164.mm.1	Kcna6 // Kcna6 // Kcna6 // Kcna6 // Kcna6 // Kcna6 // Kcna6 // Kcna6 // Kcna6 // Kcna6 // Kcna6 // Kcna6	-0.533869	0.612946	0.799153	0.419214	3.97869	-1.33302	5	0	0	0	-0.204135	-1.40474	0.0762043	2.12924	0.296978	0.798972	-0.226227	-1.22367	-0.358945	0.180369	-1.10003	-0.925805	0.941298	-1.7074	1.0993	0.0452281	-0.814093	0.317757	0.995872	1.08383
498	TC0100000501.mm.1	---	-0.721322	0.66465	0.611233	0.315221	4.29566	-1.33256	7	0	0	0	-1.4915	-1.37199	0.00287055	2.28091	2.00602	-0.156466	0.625621	-0.603736	-0.53624	-0.138484	-1.36237	-0.151537	0.429809	-0.490253	0.353169	-0.421129	-0.808402	0.407034	0.452389	0.974277
46059	TC1100003726.mm.1	Gm11555	-0.438917	0.673157	0.893122	0.0815779	5.14793	-1.33204	6	0	0	0	-0.144409	-0.0876452	0.0771975	0.0816633	1.31908	-0.284901	-0.94343	-1.15012	-0.338563	-0.0515098	-0.663116	-1.86437	-1.3943	0.210048	0.060948	2.54772	-0.0536498	0.799726	0.950445	0.929195
6736	TC0200002921.mm.1	Gm13211 // RP23-215P8.1	-0.540542	0.546841	0.789767	0.605453	3.27588	-1.33031	3	0	0	0	0.231837	-0.296135	-0.510847	0.951996	-0.334711	0.304611	-0.232542	-0.0268904	-0.587808	-1.59789	-0.424518	-0.598439	-1.07417	0.515185	2.91353	-0.486363	-1.11615	0.53337	1.48123	0.354699
1903	TC0100001924.mm.1	---	-0.423598	0.730141	0.898694	0.0330313	4.78008	-1.32229	6	0	0	0	0.594514	-0.0369339	-1.06302	-1.019	-0.219791	-0.615059	1.81149	1.29012	-1.4539	-0.620672	0.252731	-0.637904	-1.05463	0.277604	1.63355	-0.628119	-1.20705	0.929702	0.863956	0.902424
29543	TC0800000917.mm.1	---	-0.197573	0.67826	1.12407	0.557593	3.21155	-1.32165	4	0	0	0	-1.13249	-1.18149	-0.0291742	1.62795	1.56649	-0.238435	-0.43439	0.385343	0.363164	0.461606	0.0636062	0.071766	-0.399221	-0.932974	-0.461713	-1.57299	-1.52927	1.10226	0.577705	1.69225
22609	TC0600002198.mm.1	---	-0.76031	1.04752	0.557898	0.710894	2.31153	-1.31821	5	0	0	0	-1.35972	0.118318	-2.27739	0.228979	-0.877229	0.888503	-0.644647	0.449794	0.0890998	-1.87347	-0.186903	0.167887	1.68803	0.359727	0.540753	0.960061	0.0545049	0.733729	-0.224412	1.16438
64917	TC1900001078.mm.1	LOC100504651 // LOC100504651	-0.664096	0.831055	0.649191	0.135752	4.05661	-1.31329	6	0	0	0	-0.944139	0.427961	-0.786673	0.710219	0.370028	1.31117	1.65481	-0.5064	-0.904474	-0.308032	-2.15045	0.0171322	-0.660434	1.62865	-0.0670817	-0.367086	-1.37276	0.80387	0.593858	0.549845
26610	TC0700002615.mm.1	Rabac1 // Rabac1 // Rabac1 // Rabac1 // Rabac1 // Rabac1	-0.578177	0.797099	0.734241	0.436269	3.34207	-1.31242	7	0	0	0	-1.67468	-1.50432	0.519269	1.33294	1.86593	0.0515917	-0.496652	-0.147697	-0.275876	-0.730588	-0.447977	0.0669424	-0.224156	0.157644	-0.627279	1.52323	-1.59104	0.717302	0.306688	1.17873
57080	TC1500002273.mm.1	Krt73 // Krt73 // Krt73 // Krt73 // Krt73 // Krt73	-0.413482	1.02299	0.897444	0.224011	3.21533	-1.31093	7	0	0	0	0.378926	-0.985278	-1.87412	-0.135847	-0.507348	0.859137	1.61095	0.982626	0.912896	-0.0793786	0.160973	-1.40839	-0.658836	-0.256088	-1.5039	0.814998	-1.00364	1.06317	0.642587	0.986573
21377	TC0600000957.mm.1	Spr-ps1	-0.644588	0.573715	0.666233	0.52634	3.51128	-1.31082	4	0	0	0	-1.45819	-0.552382	-0.176069	0.870532	1.70678	0.926032	-1.80055	0.785441	0.0393902	-1.39389	-0.535585	-0.435385	-0.411232	-1.18119	0.302932	1.47077	-0.156096	0.0989589	0.760969	1.13877
6907	TC0200003092.mm.1	Gm13340	-0.348327	1.21755	0.961943	0.10889	2.82103	-1.31027	6	0	0	0	-2.67872	-0.407598	-0.389276	0.838198	0.822346	0.261165	-0.696913	-1.2947	0.0520132	-0.801261	0.822346	0.964204	0.583742	0.835663	-0.610119	0.0113989	-1.19832	1.04312	1.00452	0.838198
63078	TC1800000980.mm.1	Abhd3 // Abhd3 // Abhd3 // Abhd3 // Abhd3 // Abhd3 // Abhd3 // Abhd3 // Abhd3 // Abhd3 // Abhd3	-0.665602	0.890905	0.644283	0.405762	3.19324	-1.30988	7	0	0	0	0.18122	-0.13811	-1.01138	-0.132293	0.543793	0.444676	1.52515	0.389692	0.172203	-1.05756	-2.32608	-0.479512	-0.615971	1.9477	-1.31072	0.550248	-0.61591	0.199929	0.995126	0.737794
58529	TC1600001385.mm.1	Tbccd1 // Tbccd1 // Tbccd1 // Tbccd1 // Tbccd1 // Tbccd1 // Tbccd1 // Tbccd1 // Tbccd1	-0.813998	0.744539	0.495001	0.248716	4.14333	-1.309	7	0	0	0	-1.11236	-0.475312	0.270522	0.27321	1.86442	0.430026	0.580436	1.44785	-0.957162	-2.05379	-1.10638	-0.263502	1.30186	-0.68912	-0.574476	0.631938	-1.05316	0.297712	0.412904	0.774386
45706	TC1100003371.mm.1	---	-0.6299	0.647831	0.674413	0.578481	3.14955	-1.30431	4	0	0	0	-0.196262	-0.613926	-1.8493	0.539635	-0.340108	-0.382414	1.64018	2.34243	-0.204695	-0.164368	-0.222381	-1.15837	0.506769	0.53807	-1.1743	-0.333475	-0.950719	1.28835	0.595385	0.13951
41058	TC1000001919.mm.1	Lama2 // Lama2 // Lama2 // Lama2 // Lama2 // Lama2 // Lama2 // Lama2	-0.6014	0.503374	0.700477	0.366048	4.57824	-1.30188	5	0	0	0	-0.578717	-1.19298	-0.48733	2.51548	1.96867	0.243726	0.188957	-0.073267	-0.015248	-0.266422	-1.37875	-0.290347	-0.710082	-0.360617	0.306573	-0.643971	-1.3271	0.862221	0.281419	0.957791
7493	TC0200003682.mm.1	Scn7a // Scn7a // Scn7a // Scn7a // Scn7a // Scn7a	-0.47545	0.512222	0.818629	0.520972	3.61774	-1.29408	3	0	0	0	-1.02884	-0.774239	-0.144177	2.1284	2.02837	0.227876	0.16804	-0.0463909	-0.233427	-0.272696	-1.13251	0.257734	-0.283451	-1.54745	-0.0497939	-0.352802	-1.40053	0.563208	0.47466	1.41802
15643	TC0400003139.mm.1	---	-0.327183	0.742566	0.954773	0.19074	4.252	-1.28196	7	0	0	0	-0.429713	-1.10033	0.410033	0.219212	0.884287	1.67271	-0.267005	-0.248166	-0.680086	-1.22361	0.00232179	0.731104	-1.65309	0.368525	-1.27695	1.24837	-1.52192	0.912367	1.16315	0.788805
45129	TC1100002792.mm.1	Gm12240	-0.620762	0.621478	0.660807	0.780161	2.52279	-1.28157	3	0	0	0	-1.28655	-0.675205	-0.616843	-0.577022	2.16796	0.46632	1.54391	1.45159	0.292848	-1.51006	-0.330425	-0.219103	-0.265055	-0.339408	-0.919003	-0.639845	-0.526527	0.975502	-0.227551	1.23447
50190	TC1300000944.mm.1	---	-0.969834	0.51971	0.310184	0.312489	4.79925	-1.28002	6	0	0	0	-1.92023	-0.45696	-1.34595	1.29935	1.50961	-1.06529	-0.0441988	0.754232	-0.521229	-0.703582	-1.05428	-0.786611	0.325777	1.24501	1.22141	1.11335	-0.500962	0.587243	0.371851	-0.0285405
28570	TC0700004602.mm.1	---	-0.645101	0.773262	0.631289	0.142083	4.20475	-1.27639	6	0	0	0	0.175989	-0.867432	-0.0502756	0.634739	0.688457	0.320074	2.86715	-0.111261	-0.00157431	-2.06077	-0.816339	-0.895307	-1.12804	0.219261	0.228778	-0.743789	-0.353536	0.478196	0.656751	0.758919
30946	TC0800002332.mm.1	Npy5r // Npy5r // Npy5r // Npy5r // Npy5r // Npy5r // Npy5r	-0.617388	0.399879	0.65516	0.766396	2.72156	-1.27255	2	0	0	0	-0.127943	-0.196505	-0.557089	0.0214213	-0.686294	2.99562	-0.671362	-0.719616	-0.825859	-1.27221	-0.845791	-0.496314	-0.464739	0.823708	0.514757	1.04256	-0.499821	-0.0652259	0.570217	1.46049
61781	TC1700002496.mm.1	Gm4707 // Gm4707 // Gm4707	-0.892417	0.806234	0.379895	0.422467	3.25964	-1.27231	7	0	0	0	-0.925611	-0.912517	-2.33315	0.480349	1.5299	0.536352	0.686948	1.20021	-1.14428	-0.670825	0.393457	-0.65399	-0.122374	-0.0130279	-1.12879	1.60017	0.337512	0.862932	0.197414	0.0793404
8416	TC0200004611.mm.1	4932416H05Rik // 4932416H05Rik // 4932416H05Rik	-0.713135	0.650029	0.556793	0.683974	2.73054	-1.26993	3	0	0	0	-0.375414	-1.7829	-0.239679	0.822456	1.87649	1.04508	0.391287	-0.485746	-1.28483	-0.934722	-0.435645	0.0612512	-0.210319	-0.724011	-0.151599	1.8759	-1.11797	0.923343	-0.23233	0.979365
46842	TC1200000213.mm.1	---	-0.320884	0.890682	0.944856	0.523729	2.79718	-1.26574	6	0	0	0	-0.448557	-0.563642	1.36857	0.242647	1.52239	-1.72213	-0.963761	1.04701	-0.309399	-0.433215	-0.196589	-1.66335	-1.04367	-0.903481	0.799704	0.594881	-0.161976	0.688844	0.598378	1.54735
33299	TC0900001456.mm.1	Mir6236	-0.327045	0.761114	0.93709	0.0837687	4.33352	-1.26414	6	0	0	0	0.189292	0.842284	-0.854011	0.842284	-0.880074	-0.0526993	-1.20179	1.61773	-0.367589	-1.15384	-1.11944	0.173983	0.80908	0.839822	-1.78027	-1.30495	0.588907	1.00111	0.967882	0.842284
60700	TC1700001397.mm.1	---	-0.649395	0.361298	0.612298	0.547564	3.66378	-1.26169	2	0	0	0	-0.2719	-0.703962	-0.808701	0.789688	0.743558	2.63916	0.372509	-1.97681	-1.20209	-0.841182	-0.133792	-0.584142	-0.6414	0.4007	-0.57083	0.453795	0.498501	0.000753	1.05712	0.779017
30252	TC0800001632.mm.1	Ctxn1 // Ctxn1 // Ctxn1 // Ctxn1 // Ctxn1	-0.0494238	0.802699	1.20579	0.498667	3.00108	-1.25521	6	0	0	0	0.507859	0.0995605	0.933602	0.239404	-0.0184626	1.24728	-0.219479	-0.521302	0.0963054	-0.280701	-1.62787	-0.0747239	-0.962676	1.11044	-1.06792	-1.91693	-1.16175	0.870043	0.968535	1.77878
18550	TC0500001840.mm.1	---	-0.374198	0.545032	0.877174	0.400585	4.04033	-1.25137	5	0	0	0	0.0165247	0.201334	-0.405859	-1.02709	-1.70766	0.0485142	0.402986	-1.43144	-0.41536	0.154701	-1.03783	-1.13289	1.47866	0.772404	0.769406	1.7223	-1.04023	0.490963	0.849829	1.29073
41960	TC1000002824.mm.1	---	-0.349763	0.479879	0.899574	0.24829	5.40404	-1.24934	7	0	0	0	-0.522154	-0.144033	-1.26858	-0.503354	1.0155	1.97919	-2.28851	1.17767	-0.0162079	-0.522207	0.188606	-0.163764	-0.585419	0.155064	0.518061	-0.48978	-1.2288	0.792034	1.1835	0.723183
6047	TC0200002224.mm.1	LOC100861792	-0.233915	1.01481	1.01496	0.459975	2.67696	-1.24887	7	0	0	0	-2.12424	0.100667	0.491725	0.438398	0.324302	-1.83752	1.05395	-1.63835	0.304835	0.247877	0.515473	-1.17374	0.149094	-0.936968	0.590514	0.454617	-0.00550388	0.51432	1.11165	1.41889
41117	TC1000001979.mm.1	D830005E20Rik // D830005E20Rik // D830005E20Rik	-0.50531	0.640198	0.742151	0.533018	3.18656	-1.24746	4	0	0	0	-0.391762	-0.662853	-0.825403	0.600602	-0.583889	-0.196185	2.47842	1.31291	0.391107	-0.182518	-0.209831	-1.65591	0.322788	-0.666193	-0.881633	-1.54359	0.467496	0.664199	0.252401	1.30985
57199	TC1600000043.mm.1	Smim22 // Smim22 // Smim22 // Smim22 // Smim22 // Smim22 // Smim22 // Smim22 // Smim22 // Smim22 // Smim22 // Smim22 // Smim22 // Smim22 // Smim22 // Smim22 // Smim22 // Smim22 // Smim22 // Smim22 // Smim22 // Smim22 // Smim22 // Smim22 // Smim22 // Smim22 // Smim22 // Smim22 // Smim22 // Smim22 // Smim22 // Smim22 // Smim22 // Smim22	-0.0733696	0.198757	1.17398	0.467798	4.44948	-1.24735	2	0	0	0	-0.237751	-0.148029	0.0416566	0.488474	1.58572	1.35664	-1.06959	-0.90443	0.0614136	-0.403179	0.167896	0.00440578	-2.0241	-1.57813	0.222139	-0.111376	-0.97371	1.08763	0.755372	1.67894
22400	TC0600001988.mm.1	Gm25580	-0.376225	1.16695	0.858212	0.243073	2.66702	-1.23444	7	0	0	0	-0.896761	0.320619	-2.72114	0.615195	0.38364	1.1023	0.352245	-0.548349	-0.106225	-0.337767	0.318284	0.789411	0.400112	0.398759	-0.0999475	-2.2153	-0.329715	1.13824	0.734676	0.701717
22481	TC0600002069.mm.1	---	-0.923339	0.712907	0.309537	0.138102	4.38741	-1.23288	6	0	0	0	-1.60927	-1.86709	-0.191866	0.669771	0.412675	-0.982058	-0.303123	1.24244	-0.134263	-1.47597	-0.536744	-0.648176	1.29966	1.86634	0.273207	1.09089	-0.0350411	0.328517	0.437166	0.162927
25928	TC0700001929.mm.1	---	-0.241599	0.909367	0.990326	0.482802	2.78381	-1.23193	7	0	0	0	0.00290639	-0.322639	0.600083	-0.0317503	0.302415	-0.480303	-1.96012	-1.78311	-0.0369454	0.529184	-2.1234	-0.340389	0.14063	0.838631	-0.191181	0.529968	1.35503	0.986623	1.47497	0.509386
31125	TC0800002512.mm.1	Lsm6 // Lsm6 // Lsm6 // Lsm6 // Lsm6 // Lsm6 // Lsm6 // Lsm6 // Lsm6 // Lsm6 // Lsm6 // Lsm6 // Lsm6 // Lsm6 // Lsm6 // Lsm6 // Lsm6	-0.528151	0.806596	0.703748	0.445248	3.08918	-1.2319	6	0	0	0	-1.61986	-0.369286	-0.759478	1.07069	2.15443	1.12919	0.84624	-0.365335	-0.0735179	-1.51824	0.292795	0.350529	-0.549477	-1.67e-05	-1.22404	-0.258563	-1.21731	1.09818	0.22094	0.79212
63322	TC1800001225.mm.1	---	-0.577562	0.910202	0.65375	0.561243	2.6054	-1.23131	6	0	0	0	-0.607075	-0.182816	-0.508551	0.520864	0.740809	1.1394	0.728346	-1.15604	-2.5309	-0.0968516	0.276022	-0.392769	0.557663	-0.647359	-1.63121	1.51992	0.309296	0.167949	1.26812	0.52518
24748	TC0700000741.mm.1	Gm19246	-0.403446	1.0007	0.827708	0.25043	3.04046	-1.23115	7	0	0	0	-0.756896	-0.739255	0.411316	-0.0328695	0.210044	-0.185825	2.16287	1.22247	-0.177729	-2.34084	0.53877	0.24051	-0.438991	0.407654	-0.912097	-0.905293	-1.18697	0.592261	0.800039	1.09082
22082	TC0600001668.mm.1	---	-0.777268	0.686826	0.450878	0.238348	4.18001	-1.22815	7	0	0	0	-0.590347	-1.37098	-0.392156	1.78109	0.732554	-0.199234	-1.73555	0.4975	-0.857111	0.462528	-1.57371	-1.1191	0.0139853	0.919446	1.80093	-0.0630445	0.34057	0.713935	0.249274	0.389425
3795	TC0100003843.mm.1	---	-0.515193	0.593367	0.708077	0.471871	3.46661	-1.22327	4	0	0	0	0.0244618	-0.736664	-0.310514	0.354985	1.35078	0.681095	-0.705287	0.836217	0.302277	-0.605081	-0.771499	-1.50933	-0.722275	-0.197933	-2.12346	2.09553	-0.0875406	0.329309	1.23667	0.558252
34536	TC0900002701.mm.1	5730403I07Rik // 5730403I07Rik // 5730403I07Rik	-0.30031	0.806278	0.921582	0.192437	3.76702	-1.22189	7	0	0	0	-0.625323	-0.068147	0.0126438	0.0955377	-0.694522	1.40205	-1.12037	0.68027	-0.191835	0.833844	-0.233189	-1.83016	0.457097	-0.0314037	-2.47846	1.14238	-0.115163	0.951633	1.09723	0.715888
14752	TC0400002243.mm.1	Gm26148	-0.28434	0.491837	0.932109	0.626633	2.99064	-1.21645	3	0	0	0	-0.368153	-0.168023	0.558609	0.888877	1.17009	-1.63368	-0.200679	1.88741	-0.170072	-0.397762	-0.328512	-1.11646	-1.38599	-0.58921	0.0298944	-1.58589	0.613224	0.225196	1.41926	1.15187
44670	TC1100002330.mm.1	Gm22990	-0.711097	0.89759	0.503703	0.236507	3.3218	-1.2148	7	0	0	0	0.336969	-0.512943	-2.34691	0.69321	0.683137	1.67773	1.13202	-0.844375	-1.2732	0.121219	-0.603646	-0.699164	-0.572229	0.036759	-1.22809	1.3783	0.510093	0.236151	0.590073	0.684886
49144	TC1200002557.mm.1	Ighv2-3	-0.495678	0.763704	0.718642	0.622448	2.63443	-1.21432	4	0	0	0	-2.17364	-0.365192	0.00846181	0.143595	0.980871	-2.71832	0.0670639	0.884281	0.049559	-0.448716	-0.194437	-0.345774	0.949543	-0.179717	1.14508	0.181973	-0.140554	0.0381214	0.858629	1.25918
37224	TC0X00002052.mm.1	Nkrf // Nkrf // Nkrf // Nkrf // Nkrf // Nkrf // Nkrf	-0.264011	0.805334	0.946884	0.354843	3.30025	-1.21089	7	0	0	0	0.339559	-0.138238	-1.8262	0.830436	0.296336	0.162114	-0.0171013	2.10403	0.453047	-0.603438	0.374589	-0.447394	-0.73055	-1.77961	-1.15577	0.411961	-1.11442	1.07858	0.545021	1.21705
41781	TC1000002645.mm.1	Chpt1 // Chpt1 // Chpt1 // Chpt1 // Chpt1 // Chpt1 // Chpt1 // Chpt1 // Chpt1 // Chpt1 // Chpt1 // Chpt1 // Chpt1 // Chpt1 // Chpt1 // Chpt1 // Chpt1 // Chpt1 // Chpt1 // Chpt1 // Chpt1 // Chpt1 // Chpt1 // Chpt1 // Chpt1 // Chpt1 // Chpt1 // Chpt1 // Chpt1 // Chpt1	-0.600042	0.705561	0.610629	0.419041	3.36235	-1.21067	6	0	0	0	-1.58648	-1.4434	-0.212725	1.86281	1.632	-0.666701	-0.507703	0.185986	0.145489	0.105963	-0.826238	-0.382903	1.70895	-1.25255	-0.568876	0.399126	-0.424639	0.130214	0.800868	0.900803
4963	TC0200001130.mm.1	Gm23164	-0.169981	0.545899	1.03748	0.168426	5.29366	-1.20746	7	0	0	0	0.313841	-0.341269	-1.23242	1.39066	0.699616	1.39196	0.715124	-2.09164	0.196781	-0.120147	-0.322139	0.315487	-0.635824	-1.1165	-1.06687	0.087007	-1.29611	1.09279	1.1713	0.848356
54609	TC1400002644.mm.1	---	-0.640031	0.680682	0.566293	0.0950844	4.58564	-1.20632	6	0	0	0	0.388006	-0.775476	-0.728144	0.284917	-0.054203	-1.27073	0.615178	0.0588838	-0.392115	-0.0952358	-1.26082	-1.61643	-0.138211	0.531349	-0.622713	3.085	0.291871	0.596986	0.459653	0.64224
57899	TC1600000746.mm.1	Abi3bp // Abi3bp // Abi3bp // Abi3bp // Abi3bp // Abi3bp // Abi3bp // Abi3bp // Abi3bp // Abi3bp // Abi3bp // Abi3bp // Abi3bp // Abi3bp // Abi3bp // Abi3bp // Abi3bp // Abi3bp // Abi3bp // Abi3bp // Abi3bp // Abi3bp // Abi3bp // Abi3bp // Abi3bp // Abi3bp	-0.438324	0.503451	0.767359	0.122129	5.94135	-1.20568	7	0	0	0	-0.813122	-0.803281	-0.121408	2.4048	1.68742	-0.110015	-0.491076	-0.527128	-0.275504	-0.519948	0.45884	-0.993842	-0.50083	-1.97314	0.400754	0.594946	-0.719538	0.896842	0.654233	0.751002
43678	TC1100001327.mm.1	Gm9378	-0.613946	0.902075	0.58463	0.0791395	3.48423	-1.19858	6	0	0	0	-2.00115	0.328719	-1.15851	0.821562	0.647462	-1.32109	1.57067	0.656115	-1.25118	-0.63328	0.13029	0.287493	-0.363807	0.300772	0.421307	1.36927	-1.55852	0.622715	0.637527	0.493649
56978	TC1500002170.mm.1	Zfp641 // Zfp641 // Zfp641 // Zfp641 // Zfp641 // Zfp641 // Zfp641 // Zfp641	-0.192045	1.05901	0.997247	0.328666	2.68482	-1.18929	7	0	0	0	0.320389	-0.0728777	0.754656	0.619487	1.39446	-1.51473	0.16929	0.115337	0.0196585	0.0791422	-2.50977	0.0644812	0.0736954	-1.08345	-0.685109	0.687446	-1.42385	1.28832	0.640808	1.06262
47222	TC1200000598.mm.1	---	-0.0213725	0.505088	1.16292	0.0840275	6.01244	-1.18429	6	0	0	0	-0.695936	-0.137901	-0.552587	-0.0311592	-1.13453	1.34711	-1.14519	-1.03698	0.11412	0.144145	0.815313	0.163238	-1.17777	0.583848	1.7421	-1.08384	-1.40273	1.21649	1.06607	1.20618
37044	TC0X00001867.mm.1	Llph-ps2 // Llph-ps2 // Llph-ps2	-0.2672	1.02886	0.914662	0.2419	2.86032	-1.18186	7	0	0	0	-2.28253	0.204472	-0.159043	0.114622	1.44733	-1.58987	0.739134	0.796046	1.00097	-0.669233	0.266109	-0.231147	0.420946	-0.337185	-1.65096	0.0167672	-0.830407	0.858561	0.705741	1.17968
25095	TC0700001090.mm.1	---	-0.656034	0.559712	0.524048	0.414772	3.69318	-1.18008	5	0	0	0	-1.56306	-0.572388	-1.33463	1.69311	1.77198	1.31735	-0.834081	-0.50381	-0.156193	-0.265234	-0.3551	-0.34563	0.128097	-1.2884	0.100539	1.40392	-0.768609	0.053854	0.680254	0.838036
9204	TC0200005408.mm.1	Gata5 // Gata5 // Gata5 // Gata5 // Gata5 // Gata5 // Gata5 // Gata5 // Gata5	-0.534191	0.686184	0.638733	0.28586	3.81547	-1.17292	7	0	0	0	-0.862507	0.160132	-0.286774	2.93955	0.895813	0.29984	-0.356287	0.724117	-0.773991	0.308269	-1.71987	-0.564595	-1.14504	0.1414	-0.54787	-0.153404	-0.974982	0.431812	0.964912	0.519474
54593	TC1400002627.mm.1	---	-0.391524	0.750708	0.781238	0.371104	3.29846	-1.17276	7	0	0	0	0.509642	-1.26755	-0.211563	1.27845	0.0562692	2.15269	-0.0312434	-0.0713326	-0.0225757	-1.57817	-0.222352	0.051889	-1.66867	0.755402	-0.0825541	-0.357534	-1.63452	0.431372	1.17044	0.741897
21042	TC0600000619.mm.1	Gm15050 // RP23-103L13.9	-0.539044	0.715041	0.630841	0.282735	3.70531	-1.16988	7	0	0	0	0.0592283	-1.54203	-1.45998	-0.0922729	1.13252	2.34438	1.43712	-0.901581	-0.0597954	-0.040576	0.0330284	-0.763177	-1.13899	0.69636	-0.185862	-0.522289	-0.888599	0.94316	0.392331	0.557031
15676	TC0400003173.mm.1	---	-0.517957	0.318778	0.642394	0.600465	3.16155	-1.16035	2	0	0	0	-0.535526	-0.322402	-0.907521	-0.0434426	1.80058	-1.42692	1.15857	2.17669	0.00198474	-0.827471	-0.680583	-0.354185	-1.67849	0.319827	0.109616	-0.316952	-0.400948	-0.0115241	0.769725	1.16898
48960	TC1200002355.mm.1	Gm23872	-0.347505	0.928288	0.802094	0.480723	2.56972	-1.1496	7	0	0	0	-1.96729	-0.935958	0.276665	0.961314	0.841392	0.377937	-1.3804	-1.27012	-0.0181849	-0.705787	0.828466	0.0895558	1.03889	0.683822	-1.33655	-0.934772	1.04473	0.418725	1.34144	0.646122
53081	TC1400001097.mm.1	---	-0.739222	0.848319	0.409157	0.266583	3.22885	-1.14838	7	0	0	0	-0.0815332	0.196801	-0.930489	0.516864	-0.165272	0.803141	1.63832	-0.737323	-0.314716	-1.91284	-1.841	-0.290778	-0.54882	1.82803	0.315395	1.21116	-0.914406	0.290461	0.714472	0.222538
1082	TC0100001097.mm.1	Gm8217	-0.023924	0.830976	1.12197	0.483234	2.72767	-1.1459	6	0	0	0	-1.61615	0.276568	0.00577279	0.959512	0.82672	0.760534	-0.258058	-1.33051	0.970688	-0.455965	0.545161	0.106456	-0.728609	-0.40336	-2.06303	0.286619	-1.24827	0.587093	1.25178	1.52705
38312	TC0X00003153.mm.1	Gm15100 // RP23-140E23.1	-0.761511	0.464557	0.379577	0.164697	5.71458	-1.14109	7	0	0	0	-0.993577	-0.656596	0.0389516	0.503718	-0.0424851	1.64739	1.27437	-1.25894	-1.27098	-1.14241	-0.369184	-0.936786	0.180261	0.965846	1.66496	-1.58969	0.84641	0.280514	0.569697	0.288521
38313	TC0X00003154.mm.1	Gm15086 // RP23-265N8.1	-0.761511	0.464557	0.379577	0.164697	5.71458	-1.14109	7	0	0	0	-0.993577	-0.656596	0.0389516	0.503718	-0.0424851	1.64739	1.27437	-1.25894	-1.27098	-1.14241	-0.369184	-0.936786	0.180261	0.965846	1.66496	-1.58969	0.84641	0.280514	0.569697	0.288521
45415	TC1100003078.mm.1	Slc2a4 // Slc2a4 // Slc2a4 // Slc2a4 // Slc2a4 // Slc2a4 // Slc2a4 // Slc2a4 // Slc2a4 // Slc2a4 // Slc2a4 // Slc2a4 // Slc2a4 // Slc2a4 // Slc2a4 // Slc2a4 // Slc2a4 // Slc2a4 // Slc2a4 // Slc2a4 // Slc2a4 // Slc2a4	-0.315634	0.833168	0.82161	0.396298	2.92161	-1.13724	7	0	0	0	0.383753	-0.469965	0.281976	1.37581	2.04456	0.0233334	0.221091	-0.0225504	0.212975	0.0644467	-1.96059	-0.722037	-0.631778	-1.68255	-1.0961	0.506432	-0.99365	1.25066	0.469292	0.744873
16962	TC0500000241.mm.1	---	-0.695079	0.539016	0.438092	0.3087	4.1863	-1.13317	6	0	0	0	-1.04659	-0.597824	-0.245679	2.81643	1.47585	0.182126	-0.139649	0.545378	-0.587608	-0.130764	-1.72119	-0.535894	0.117015	-1.21679	0.743014	-0.740101	-0.232	0.0818861	0.62775	0.604639
7062	TC0200003248.mm.1	Mir133c	-0.299327	0.738553	0.832821	0.427573	3.03816	-1.13215	6	0	0	0	-0.0366063	-0.548418	0.655923	1.24101	-0.112369	-0.148834	-2.75798	0.839418	0.269489	-0.0926688	-0.758262	-1.58475	-1.08166	0.912622	-0.395473	0.590733	0.50936	0.785567	1.28206	0.430838
54047	TC1400002071.mm.1	Slc22a17 // Slc22a17 // Slc22a17 // Slc22a17 // Slc22a17 // Slc22a17 // Slc22a17 // Slc22a17	0.02399	0.638058	1.15582	0.391716	3.42339	-1.13183	6	0	0	0	0.527335	0.755973	0.237441	0.602927	0.781409	-0.478288	0.411345	1.18651	-0.100682	-0.0596864	-1.23502	0.0425678	-0.624288	-1.86862	-1.74496	-0.348755	-1.55265	0.753359	1.17826	1.53583
35185	TC0M00000009.mm.1	ATP8 // ATP6 // COX3	-0.209453	1.03873	0.92116	0.120061	2.83592	-1.13061	6	0	0	0	-1.30274	0.227457	-1.19249	0.782528	0.782528	-1.05832	-1.79612	-0.829765	0.392071	-1.36427	0.782528	0.991279	0.758508	0.782037	-0.872291	-0.767538	0.921126	0.991279	0.989673	0.782528
46331	TC1100003999.mm.1	Abca8a // Abca8a // Abca8a // Abca8a // Abca8a // Abca8a // Abca8a // Abca8a // Abca8a // Abca8a // Abca8a // Abca8a // Abca8a // Abca8a // Abca8a // Abca8a // Abca8a // Abca8a // Abca8a // Abca8a	-0.633719	1.1012	0.4927	0.260627	2.54512	-1.12642	7	0	0	0	-0.90556	-0.127186	-0.176614	2.27636	0.847112	-0.0205748	-0.228337	0.416819	0.217653	0.118204	-2.96712	-0.595413	0.10355	1.06299	-0.403736	-0.644528	-0.451711	0.228801	0.749927	0.499373
41528	TC1000002392.mm.1	Mmp11 // Mmp11 // Mmp11 // Mmp11 // Mmp11 // Mmp11 // Mmp11 // Mmp11 // Mmp11 // Mmp11 // Mmp11 // Mmp11 // Mmp11 // Mmp11 // Mmp11	-0.834256	0.494074	0.291862	0.351446	4.08367	-1.12612	5	0	0	0	-0.64363	-0.746164	-0.336697	-0.786951	-0.249512	1.19362	-0.451186	0.68238	-0.417521	-1.01167	-0.866595	-1.81752	2.46246	1.50294	-0.435543	0.926801	0.119201	0.570071	0.408616	-0.103103
44876	TC1100002537.mm.1	Gm25693	-0.658505	0.548267	0.457767	0.259099	4.36765	-1.11627	7	0	0	0	-0.110927	-0.432858	-1.6827	0.663121	0.645083	2.35193	1.6541	-1.29667	-1.0094	-0.759986	-0.199428	-0.414235	-0.251747	0.031573	-1.44855	0.307927	0.57947	0.162266	0.565001	0.646033
45839	TC1100003504.mm.1	Gm11493 // RP23-393B19.2	-0.499274	0.35477	0.612783	0.174781	6.62654	-1.11206	7	0	0	0	-0.566143	-0.844658	0.212142	-0.313408	0.683473	0.462746	3.25165	-0.415775	-0.420681	-0.824371	-0.447992	-0.603213	0.847671	0.0381671	-1.02581	-0.574169	-1.29798	0.658168	0.760395	0.419787
33999	TC0900002162.mm.1	---	-0.314548	0.801879	0.793257	0.317819	3.12675	-1.1078	7	0	0	0	0.156143	0.19092	0.156552	1.49624	-0.507445	0.0228452	-0.0618055	0.231341	0.186062	-0.235986	-1.97933	-0.676199	-0.118888	0.0534671	1.82864	-2.44719	-0.675146	0.899681	0.435883	1.04421
33029	TC0900001183.mm.1	---	-0.821104	0.681673	0.285247	0.26554	3.69017	-1.10635	7	0	0	0	-0.230984	0.0597996	-1.78084	0.461213	1.02627	0.693448	1.20685	0.470056	-0.76329	-0.63787	-0.737477	-1.65707	0.404623	-1.92147	0.529317	0.143788	1.87788	0.482962	-0.0165714	0.389352
6808	TC0200002993.mm.1	---	-0.601805	0.603491	0.499244	0.361131	3.5629	-1.10105	6	0	0	0	-0.546523	-0.95597	0.0231765	1.72332	1.83244	0.948491	-1.39081	-0.380027	0.0317112	-0.125294	-1.37682	-1.26292	-1.52521	0.515347	-0.503685	0.717231	0.777795	0.119029	0.837652	0.541052
19025	TC0500002320.mm.1	Prom1 // Prom1 // Prom1 // Prom1 // Prom1 // Prom1 // Prom1 // Prom1 // Prom1 // Prom1 // Prom1 // Prom1 // Prom1 // Prom1 // Prom1 // Prom1 // Prom1 // Prom1 // Prom1 // Prom1 // Prom1 // Prom1 // Prom1 // Prom1 // Prom1 // Prom1 // Prom1 // Prom1 // Prom1 // Prom1 // Prom1 // Prom1 // Prom1 // Prom1 // Prom1 // Prom1 // Prom1	-0.417244	0.486177	0.673039	0.364819	3.90056	-1.09028	5	0	0	0	-0.0908467	0.0156632	-0.187954	2.27947	1.2772	-0.716315	1.72618	-0.130364	-0.0757669	-0.370058	-1.0588	-1.15295	-1.57199	-1.3057	-0.337027	0.0136348	-0.333494	1.0785	0.371347	0.569269
46021	TC1100003688.mm.1	Nr1d1 // Nr1d1 // Nr1d1 // Nr1d1 // Nr1d1 // Nr1d1 // Nr1d1 // Nr1d1	-0.55458	0.583259	0.531729	0.374011	3.52025	-1.08631	6	0	0	0	-1.04001	-1.30281	-0.125689	2.79228	1.90809	-0.105107	0.232708	-0.0154145	-0.0778306	-0.11186	-1.17399	-0.0498618	-0.832677	-0.0305929	-0.553114	-0.0257884	-1.08351	0.638696	0.115888	0.840601
29451	TC0800000823.mm.1	Klf2 // Klf2 // Klf2 // Klf2 // Klf2 // Klf2 // Klf2	-0.581822	0.6345	0.502232	0.181377	4.14259	-1.08405	7	0	0	0	-0.624176	-0.778733	0.256462	-0.770362	-0.68148	0.589519	-0.33086	1.17915	-0.00189272	-0.624729	-0.562986	-1.7367	1.48213	2.53397	-0.282561	-1.32648	0.173028	0.599925	0.292949	0.613821
41567	TC1000002431.mm.1	Gm7137	-0.333057	0.507305	0.749391	0.230305	4.63901	-1.08245	7	0	0	0	-0.875744	-0.334685	-0.118109	1.31714	1.34194	2.31149	-0.608707	-1.66236	0.195328	0.026156	-0.0467538	-1.17759	-0.617338	-1.16519	-1.05211	0.165658	0.0527132	0.524215	0.984503	0.739455
30681	TC0800002066.mm.1	Dlc1 // Dlc1 // Dlc1 // Dlc1 // Dlc1 // Dlc1 // Dlc1 // Dlc1 // Dlc1 // Dlc1 // Dlc1 // Dlc1 // Dlc1 // Dlc1 // Dlc1 // Dlc1 // Dlc1 // Dlc1 // Dlc1 // Dlc1 // Dlc1 // Dlc1 // Dlc1 // Dlc1 // Dlc1 // Dlc1 // Dlc1 // Dlc1 // Dlc1 // Dlc1 // Dlc1 // Dlc1	-0.449491	0.943738	0.630259	0.405264	2.53111	-1.07975	7	0	0	0	0.0329279	0.00547094	0.135138	1.41907	1.13681	1.45974	0.656667	-0.346422	-0.0254539	0.289091	-2.13342	-1.45019	0.588993	-1.39813	-0.515875	-1.43955	-0.305652	0.901945	0.164447	0.824385
59842	TC1700000527.mm.1	Gm24026	-0.606918	0.570432	0.471944	0.274251	4.03314	-1.07886	7	0	0	0	0.0333763	-0.434289	-1.6145	0.530363	0.557517	2.15129	1.51794	-1.25965	-0.425927	-1.13549	-0.197618	-0.473971	-0.478582	0.168947	-1.76445	1.00103	0.408177	0.157495	0.596687	0.66165
35808	TC0X00000612.mm.1	FMR1-AS1_1	-0.704281	0.35725	0.373045	0.0808781	7.5404	-1.07733	7	0	0	0	-0.194655	-1.32867	-0.832698	0.546843	-0.41499	0.507585	1.99238	-0.953138	-0.810682	-0.709751	-0.639276	-0.414241	-0.376108	1.59582	2.2045	-0.232504	-1.05956	0.34472	0.310139	0.464275
45533	TC1100003196.mm.1	Gm22993	-0.524591	0.907048	0.539303	0.346288	2.68071	-1.06389	7	0	0	0	-1.01349	-0.235047	-2.14178	1.39203	1.0248	-0.13799	0.389362	-2.3879	-0.997909	0.109213	0.278233	0.32864	0.117648	0.746328	-0.465123	0.222997	1.15208	0.5341	0.888164	0.195646
53940	TC1400001964.mm.1	---	-0.447389	0.564788	0.614361	0.396637	3.39147	-1.06175	5	0	0	0	-0.608949	-0.393979	0.236084	2.44153	0.677815	0.611112	-1.59342	1.06764	0.205716	-1.42585	-0.608813	-0.535934	-1.30843	-0.762472	1.02499	-0.288895	-0.581227	0.158131	0.877283	0.807669
59985	TC1700000679.mm.1	Gm25128	-0.125275	0.912524	0.927293	0.388498	2.55837	-1.05257	7	0	0	0	0.258581	0.475171	-1.61395	0.478774	0.475171	-1.52068	-0.380477	-2.28183	0.177571	-0.754868	-0.557855	1.13843	0.475171	0.474355	-0.952761	0.0918185	1.23551	1.14426	1.15885	0.478774
33477	TC0900001636.mm.1	---	-0.414513	0.762906	0.636815	0.199117	3.38676	-1.05133	7	0	0	0	-0.518239	-1.56687	0.442771	1.58784	0.727732	-1.38816	0.191543	-0.299365	-0.332242	-1.26752	0.15907	0.181433	1.20539	-0.902592	1.47416	0.240293	-1.84569	0.845461	0.44884	0.616144
15994	TC0400003494.mm.1	D130007C19Rik	-0.27862	0.663647	0.770171	0.186725	3.84144	-1.04879	7	0	0	0	-0.896449	-0.0371456	-0.0974511	1.28452	1.44357	1.03853	-1.6942	0.577967	0.139918	0.545397	-1.4216	-0.183014	0.806315	-1.11037	-0.0118983	-0.881306	-1.81331	0.765259	0.585951	0.959303
28935	TC0800000303.mm.1	---	-0.46726	0.66982	0.568558	0.202711	3.71379	-1.03582	7	0	0	0	-0.204831	-0.0943639	0.035949	-0.77786	1.38667	1.83958	1.52457	-1.59884	-0.13634	-0.517114	-0.431676	-1.92244	-1.60481	0.478521	0.35682	-0.0561335	0.0166198	0.379647	0.782706	0.543321
30248	TC0800001628.mm.1	Gm23888	-0.14391	0.740761	0.891878	0.510081	2.54903	-1.03579	5	0	0	0	0.125501	0.635985	-0.0274629	0.555922	0.494084	-0.605692	0.411202	-0.360195	-1.73534	0.0204846	-0.0588912	0.0323571	0.867426	-1.35413	-2.50691	1.46904	-0.63901	0.331121	1.32829	1.01622
51681	TC1300002447.mm.1	---	-0.621228	0.341385	0.406968	0.486645	3.32559	-1.0282	2	0	0	0	-0.956419	-0.641897	-0.508495	0.839372	1.80755	-2.13361	1.65723	-0.243991	-0.351377	-0.176728	-1.16696	-0.546721	0.451985	-0.775555	1.56319	0.13669	-0.175171	0.622004	0.749053	-0.150153
2195	TC0100002219.mm.1	---	-0.613411	0.522291	0.409269	0.27369	4.04444	-1.02268	7	0	0	0	-0.287567	-1.47151	-0.0637073	0.76562	2.14996	-1.29205	0.701679	-0.223077	-0.735036	-0.88209	-0.0173753	-0.836594	-0.201466	-1.44841	2.0788	0.43183	0.103184	0.497718	0.102292	0.627796
5894	TC0200002070.mm.1	---	-0.840463	0.401689	0.176318	0.229574	5.04503	-1.01678	6	0	0	0	-0.919991	-1.03774	-0.794869	2.63307	1.93436	0.863035	1.00155	0.0128392	-0.298671	-1.11376	-1.38441	-0.333808	-0.507034	-0.417308	-0.00245184	0.0205713	-0.184341	0.0928723	0.000136	0.435944
57423	TC1600000267.mm.1	---	-0.346567	0.883816	0.666897	0.096506	2.99252	-1.01346	6	0	0	0	-0.813961	-1.94622	-0.320471	0.608979	1.36974	-1.05164	0.234538	-0.71137	0.628711	0.62888	-0.269732	-0.333176	-0.968144	2.28568	-0.133014	0.199851	-1.40935	0.6363	0.589399	0.774993
16960	TC0500000239.mm.1	---	-0.585817	0.543976	0.415136	0.269665	3.88116	-1.00095	7	0	0	0	-1.15061	-0.906309	-0.322916	2.70239	2.12676	-0.292425	-0.313132	0.0553857	0.126754	-0.21608	-1.3327	-0.298864	-0.178713	-1.2625	-0.315719	0.594472	-0.261209	0.209832	0.31504	0.720537
50678	TC1300001435.mm.1	Gm23415	-0.576276	0.51408	0.420224	0.125427	4.80566	-0.9965	7	0	0	0	0.168058	-0.457396	-0.750564	0.508624	0.508624	1.76378	1.99176	0.0642597	-0.652395	-1.51849	-0.271375	-0.551772	-0.574618	0.483383	-2.47379	0.0059058	0.495335	0.275934	0.481543	0.503195
4102	TC0200000262.mm.1	---	-0.737396	0.355408	0.252523	0.326744	4.27452	-0.989919	4	0	0	0	-0.95265	-0.236992	-0.841078	-0.394138	0.623889	-0.496377	0.619086	2.84457	-0.211295	-0.940738	-1.04023	-0.938791	-0.12794	1.18925	-1.31735	0.217517	1.24571	-0.0761626	0.25644	0.57729
35823	TC0X00000627.mm.1	1110012L19Rik // 1110012L19Rik // 1110012L19Rik // 1110012L19Rik // 1110012L19Rik	-0.742388	0.810611	0.243599	0.313177	2.77151	-0.985987	7	0	0	0	-2.30394	0.129176	-1.12579	0.675109	1.24367	-0.560668	-1.40626	0.444009	-0.0330716	-0.764999	-0.646745	-0.45135	0.525655	0.578954	-0.368796	1.54959	1.78466	-0.0191645	0.590146	0.159815
65053	TC1900001214.mm.1	Foxb2 // Foxb2 // Foxb2 // Foxb2 // Foxb2 // Foxb2	-0.642832	0.66184	0.317202	0.303801	3.14232	-0.960034	7	0	0	0	-0.85272	-0.258158	-1.91125	-0.480519	1.09818	-0.919255	-0.33594	1.39774	-0.148921	-0.940256	0.0207185	-0.409237	-0.0749486	-0.363936	2.16208	1.81004	-0.745221	0.0404085	0.268959	0.642238
22317	TC0600001903.mm.1	Asz1 // Asz1 // Asz1 // Asz1 // Asz1 // Asz1 // Asz1 // Asz1 // Asz1 // Asz1 // Asz1 // Asz1 // Asz1 // Asz1	-0.145318	0.921336	0.808859	0.279131	2.48668	-0.954178	7	0	0	0	0.764668	0.174884	0.23799	1.37787	1.24502	-0.0101413	-0.991049	1.12507	0.187615	0.447458	-1.82089	-1.00895	-2.00775	-0.936197	-0.210813	-0.00549022	-0.995867	0.519279	0.831088	1.07621
7657	TC0200003847.mm.1	Gm23452	-0.45268	0.414466	0.498459	0.304703	4.03779	-0.951139	5	0	0	0	-0.772045	-0.908373	-0.147799	1.14275	-1.62389	-1.15171	-0.827187	-0.258375	0.167992	-0.587568	-0.795548	-0.125416	1.76809	-0.271691	0.0842559	0.304401	2.50674	0.235272	0.427833	0.832274
58304	TC1600001156.mm.1	AU021092 // AU021092 // AU021092 // AU021092 // AU021092 // AU021092	-0.740545	0.690191	0.20561	0.0252964	3.62128	-0.946155	6	0	0	0	-0.0753255	-0.558035	-1.0806	2.55741	0.384147	0.956848	1.48649	-0.916153	-0.529771	-0.0280312	-2.04373	-0.86832	-0.785569	0.825375	0.270359	-0.35946	0.147543	0.204565	0.180852	0.231412
56359	TC1500001543.mm.1	---	-0.624128	0.653792	0.31723	0.141236	3.6176	-0.941358	7	0	0	0	-1.50635	-1.29003	0.203426	1.31826	2.08818	-1.50515	1.72239	0.0982459	-0.178976	-1.04421	-0.132193	-0.420561	0.75277	-0.85601	0.614876	-0.318698	-0.497662	0.165294	0.341874	0.444522
59518	TC1700000201.mm.1	---	-0.612641	0.554868	0.325592	0.207218	3.88591	-0.938233	7	0	0	0	-0.401593	-0.401596	-0.774381	0.633359	-0.979115	-1.8228	0.203963	2.15994	0.358315	-0.927381	-0.703388	-1.43846	1.67311	-0.577604	1.06653	0.533769	0.420553	0.419499	0.0880464	0.469231
32592	TC0900000741.mm.1	---	-0.745707	0.40373	0.184244	0.187529	4.97024	-0.929951	7	0	0	0	-0.261764	-0.932483	-0.827059	-0.490516	1.18961	2.61591	0.0500554	-0.293961	-0.724859	-0.152904	-1.10376	-1.21712	-0.315171	2.10414	-0.724755	-0.0308261	0.562738	-0.00924635	0.196796	0.365181
57889	TC1600000736.mm.1	---	-0.195417	0.545214	0.701461	0.153295	3.99904	-0.896878	7	0	0	0	0.577909	0.0980835	-0.603973	1.10974	0.42707	-1.41274	0.0692228	-0.461875	-0.244707	0.186503	-1.07376	-0.307974	-1.13051	-1.30369	0.293188	2.75161	-1.07849	0.526238	0.767349	0.810796
7465	TC0200003654.mm.1	Grb14 // Grb14 // Grb14 // Grb14 // Grb14 // Grb14 // Grb14 // Grb14 // Grb14 // Grb14 // Grb14 // Grb14 // Grb14 // Grb14 // Grb14 // Grb14 // Grb14 // Grb14 // Grb14 // Grb14 // Grb14 // Grb14	-0.427608	0.701373	0.461518	0.142465	3.20335	-0.889126	7	0	0	0	-1.07838	-0.402152	0.157384	2.58343	1.44234	-0.0935815	0.593275	-0.253351	0.05451	0.132499	-1.68259	-0.174533	0.866781	-1.67747	-0.28587	-0.650915	-0.915931	0.337789	0.429496	0.617269
18700	TC0500001991.mm.1	Mir5109 // Mir5109	0.0557973	0.762105	0.935787	0.366024	2.46321	-0.87999	7	0	0	0	-1.01296	0.51332	-0.842145	0.51332	0.51332	-0.385021	-2.32051	-1.34524	-0.175406	0.34988	0.51332	1.04458	0.51332	0.30263	-0.483475	-1.66942	1.16313	1.13633	1.15771	0.51332
25162	TC0700001157.mm.1	Gm15880 // Gm15880 // Gm15880	-0.458541	0.539765	0.419479	0.190603	3.78786	-0.878021	7	0	0	0	-0.134361	-0.521661	-1.04481	-0.355472	-0.197848	3.46741	0.875136	-0.627328	-0.33947	-0.161695	0.267101	-1.2749	-0.416607	0.578979	-0.355676	-1.09131	0.0740662	0.202509	0.559936	0.495993
55086	TC1500000253.mm.1	---	-0.315546	0.714229	0.553638	0.152786	3.06051	-0.869184	7	0	0	0	0.420568	0.399886	-0.677379	-0.46741	-0.339454	2.45402	0.119944	-2.00213	-0.210685	-0.328097	-1.67022	-0.142889	0.574689	0.760378	-0.0373743	0.937385	-1.45214	0.479374	0.72936	0.45218
2028	TC0100002050.mm.1	---	-0.612548	0.696062	0.255964	0.0465425	3.28415	-0.868512	6	0	0	0	-1.86889	-0.68609	-0.514511	1.96001	0.845506	-0.434433	0.606244	1.64911	-0.14905	-1.0974	0.212102	-0.184003	1.35594	-1.6823	0.348593	-0.619328	-0.509402	0.257817	0.301553	0.208523
4095	TC0200000255.mm.1	---	-0.358814	0.64647	0.50307	0.130681	3.37034	-0.861885	7	0	0	0	-0.828543	-1.57983	-0.258781	2.41875	1.58771	-0.968953	0.383796	-0.283524	0.24588	0.141008	-0.277474	0.0460435	0.0653169	-1.14895	1.18089	-0.959569	-1.27298	0.364224	0.521319	0.623668
854	TC0100000867.mm.1	---	-0.344356	0.806065	0.509095	0.364966	2.30393	-0.853451	7	0	0	0	-0.517352	-1.94915	0.10647	-0.338476	0.572171	0.0232553	-0.957484	-1.23508	0.046704	-0.529499	0.586527	-0.154191	-0.130816	1.69363	0.0778086	2.4272	-1.24901	0.104758	0.814142	0.608385
25918	TC0700001919.mm.1	Pstk // Pstk // Pstk // Pstk // Pstk // Pstk // Pstk // Pstk // Pstk // Pstk // Pstk // Pstk // Pstk // Pstk // Pstk // Pstk // Pstk // Pstk // Pstk	-0.26516	0.484405	0.579228	0.0504787	4.55458	-0.844387	6	0	0	0	-0.390333	-0.896479	-0.288342	1.56152	1.47601	1.4611	0.939341	0.295722	-0.393914	-0.606161	0.559205	0.159908	-0.154904	-2.14969	-0.892065	-1.18745	-1.23116	0.585896	0.525747	0.626041
28111	TC0700004136.mm.1	---	-0.0899378	0.843781	0.73942	0.230404	2.40011	-0.829358	7	0	0	0	0.154891	0.00144012	0.510635	-1.34937	0.508001	-0.276432	1.88295	-0.0810839	0.29177	0.384388	-0.0206709	-1.95202	1.25545	-1.5667	-1.36603	-1.05398	0.458495	0.502735	0.752544	0.962982
55549	TC1500000720.mm.1	---	-0.391689	0.898243	0.40794	0.167046	2.26564	-0.799629	6	0	0	0	0.138172	-0.469324	-0.269477	0.407168	0.0838183	-1.0447	-0.952488	-1.45013	-2.31808	0.213438	0.284471	-0.321027	0.115428	0.469572	2.7032	0.667473	0.518652	0.518652	0.489375	0.215794
24928	TC0700000921.mm.1	Luzp2 // Luzp2 // Luzp2 // Luzp2 // Luzp2 // Luzp2	-0.422538	0.629421	0.363921	0.274153	2.75233	-0.786459	7	0	0	0	3.62e-05	-0.519122	-0.522636	0.79433	1.81367	1.06864	-0.515751	1.54685	0.0717658	-0.579736	0.231797	-1.63987	-2.08602	-1.11138	-0.804431	0.265538	0.89456	0.079904	0.627011	0.384848
13124	TC0400000602.mm.1	Zfp462 // Zfp462 // Zfp462 // Zfp462 // Zfp462 // Zfp462 // Zfp462 // Zfp462 // Zfp462 // Zfp462 // Zfp462	-0.377604	0.681074	0.403788	0.203939	2.7604	-0.781392	7	0	0	0	-1.62327	-0.906409	0.376616	1.08391	0.26085	0.500068	-0.549427	-0.38688	-0.180346	0.0799922	-0.379238	-0.0105782	3.14404	-0.911317	-0.266744	-0.0600084	-1.38263	0.204861	0.612394	0.39411
12001	TC0300002724.mm.1	Gstm2 // Gstm2 // Gstm2 // Gstm2 // Gstm2 // Gstm2 // Gstm2 // Gstm2 // Gstm2 // Gstm2 // Gstm2 // Gstm2	-0.460869	0.760056	0.313059	0.0853284	2.65528	-0.773929	6	0	0	0	-1.04919	-0.399816	0.277688	0.293235	0.368033	-0.213618	-0.307503	-0.146598	0.00280278	-0.196599	-1.89092	0.0299543	3.52669	-0.0373085	-0.285066	0.00292677	-0.913882	0.409063	0.245866	0.284248
5256	TC0200001425.mm.1	Gm13815	-0.245101	0.994221	0.49217	0.185085	1.88716	-0.737271	6	0	0	0	-0.190513	0.311989	0.126395	0.311989	0.311989	-1.75815	1.14315	1.58482	-2.43112	-0.223891	0.311989	0.379441	0.311989	0.165186	0.019932	-2.13204	0.280333	0.681797	0.482725	0.311989
13537	TC0400001020.mm.1	Cachd1 // Cachd1 // Cachd1 // Cachd1 // Cachd1 // Cachd1 // Cachd1 // Cachd1 // Cachd1 // Cachd1 // Cachd1 // Cachd1 // Cachd1	-0.187279	0.286109	0.546944	0.33792	3.29154	-0.734222	3	0	0	0	-0.0950164	-0.669663	-0.527422	2.4138	1.8727	0.0138074	0.0777726	-0.177011	0.0109351	-0.0225464	-0.0170051	0.0097649	-1.7997	-1.70002	-0.0400954	0.260985	-1.25212	0.273677	0.442364	0.92479
2026	TC0100002048.mm.1	---	-0.332839	0.47672	0.39563	0.428122	2.38156	-0.728469	4	0	0	0	-1.03843	-0.920702	0.163878	2.46556	1.66844	0.526759	-1.25344	0.771829	-0.0557829	-0.187854	-0.375072	0.0840963	0.175762	-1.92909	-0.334851	-0.0245189	-0.923479	0.294308	0.0272586	0.865324
55727	TC1500000901.mm.1	Cntn1 // Cntn1 // Cntn1 // Cntn1 // Cntn1 // Cntn1 // Cntn1 // Cntn1 // Cntn1 // Cntn1 // Cntn1 // Cntn1 // Cntn1 // Cntn1 // Cntn1 // Cntn1 // Cntn1 // Cntn1 // Cntn1	-0.366924	0.559472	0.348211	0.119704	3.21455	-0.715135	7	0	0	0	0.0827581	-0.584248	-0.335152	2.67676	1.73947	-0.983985	0.535015	0.612454	0.109029	-0.12811	-1.51399	-0.198756	-1.46938	-1.22875	0.192102	-0.0406732	-0.509181	0.229338	0.468729	0.346566
47289	TC1200000665.mm.1	---	-0.297215	0.449884	0.417788	0.0425046	4.16179	-0.715004	6	0	0	0	0.201294	-0.937956	0.2198	0.639519	2.51962	-1.37881	1.55344	-0.754565	-0.745203	-0.436269	-0.341845	-0.0403302	-0.366101	-1.24002	1.34454	-0.29323	-1.19726	0.442089	0.368709	0.442567
6456	TC0200002637.mm.1	---	-0.157115	1.11719	0.552489	0.237473	1.59836	-0.709604	7	0	0	0	-0.0489209	0.458118	0.612529	0.750564	0.174193	-0.0842735	-2.19688	0.119184	0.20479	0.0709644	-2.63974	0.242456	1.15656	-0.0192512	0.128091	0.999889	-1.58573	0.492233	0.350948	0.814285
43559	TC1100001207.mm.1	---	-0.259701	0.72401	0.443616	0.123254	2.4874	-0.703317	6	0	0	0	-0.453827	0.1002	-0.990696	0.517265	0.263116	0.383862	0.276357	-3.44928	-1.43334	0.137699	0.476056	0.346004	0.517265	0.0982782	0.076029	1.34558	0.458585	0.579726	0.411576	0.339545
4817	TC0200000983.mm.1	---	-0.696024	0.492561	-0.0232209	0.12538	3.36825	-0.672803	7	0	0	0	-0.602866	-0.253379	-0.675142	0.443582	0.177374	-0.961776	0.812639	-0.108258	-0.442956	-0.210069	-1.57949	-1.10827	2.41859	-0.554972	2.37153	-0.304966	0.648085	-0.015265	0.0979913	-0.152389
40632	TC1000001490.mm.1	Wif1 // Wif1 // Wif1 // Wif1 // Wif1 // Wif1 // Wif1 // Wif1 // Wif1 // Wif1 // Wif1 // Wif1	-0.349071	0.351276	0.309661	0.214307	3.62967	-0.658732	6	0	0	0	-0.434638	-0.221959	0.00549057	-0.320776	0.0954624	-0.325004	0.517125	1.1236	0.0935703	-0.507695	-0.95257	-0.425696	3.44298	-1.4213	-0.99759	0.0393229	-0.639301	0.175388	0.556813	0.196782
43201	TC1100000848.mm.1	Tmem220 // Tmem220 // Tmem220 // Tmem220 // Tmem220 // Tmem220 // Tmem220 // Tmem220	-0.0972916	0.417999	0.489397	0.101887	3.48009	-0.586689	7	0	0	0	0.012561	0.136083	-0.0533752	-0.00561903	1.80224	-0.570189	2.13017	-1.09303	-0.190171	0.0615204	0.325552	-0.97321	-1.79345	-1.07843	0.96663	-1.53986	0.394393	0.49513	0.384765	0.588296
27562	TC0700003579.mm.1	---	-0.44293	0.306195	0.112054	0.01644	4.77942	-0.554984	6	0	0	0	-0.563935	-0.378517	-0.151244	-1.20006	-0.251451	-1.60444	2.22556	-0.137353	-0.178265	-0.959942	-0.188172	-0.680439	0.298509	2.32783	1.46766	-0.533726	0.171821	0.093815	0.116616	0.125732
32596	TC0900000745.mm.1	---	0.0944619	0.663771	-0.576063	0.347792	2.08663	0.670525	7	0	0	0	1.48299	0.111027	-0.104544	0.0828764	-0.449522	-0.43809	1.60719	1.85865	0.0531896	-0.111401	-0.0919373	-0.678091	-0.983011	0.227695	-0.436629	-2.1153	1.7131	-0.698223	-0.183672	-0.846293
59366	TC1700000045.mm.1	---	0.41646	0.276138	-0.261992	0.144361	5.07952	0.678451	7	0	0	0	0.233977	0.738796	0.224086	-1.26407	-0.279504	-0.0779812	-2.28552	-1.75403	0.562499	0.494135	0.678202	-0.0164789	1.19148	-0.750276	1.94548	1.15368	-0.0084922	-0.392712	-0.107054	-0.28621
40693	TC1000001551.mm.1	B4galnt1 // B4galnt1 // B4galnt1 // B4galnt1 // B4galnt1 // B4galnt1 // B4galnt1 // B4galnt1 // B4galnt1 // B4galnt1 // B4galnt1 // B4galnt1 // B4galnt1 // B4galnt1 // B4galnt1 // B4galnt1 // B4galnt1 // B4galnt1 // B4galnt1	-0.0125353	0.591178	-0.720379	0.120019	3.02572	0.707843	7	0	0	0	-0.218645	-0.436784	-0.163101	-1.43833	-1.30996	-0.442564	-0.5226	-0.254765	0.938659	-0.215181	0.676501	-0.669196	1.8487	2.13112	0.0892001	0.472726	1.67536	-0.674959	-0.856478	-0.629698
38116	TC0X00002956.mm.1	Gm25061	0.481286	0.820922	-0.233412	0.0951717	2.26811	0.714698	6	0	0	0	2.24232	0.0650759	-0.268387	-0.988305	0.00125264	-0.834368	1.09531	-1.98124	0.348548	0.55656	0.0725273	0.352359	-1.13471	-0.127836	2.09665	-0.809642	0.0141173	-0.313952	-0.257891	-0.128391
59478	TC1700000159.mm.1	Mllt4 // Mllt4 // Mllt4 // Mllt4 // Mllt4 // Mllt4 // Mllt4 // Mllt4 // Mllt4 // Mllt4 // Mllt4 // Mllt4 // Mllt4 // Mllt4 // Mllt4 // Mllt4 // Mllt4 // Mllt4 // Mllt4 // Mllt4 // Mllt4 // Mllt4 // Mllt4 // Mllt4 // Mllt4 // Mllt4 // Mllt4 // Mllt4 // Mllt4 // Mllt4 // Mllt4 // Mllt4 // Mllt4 // Mllt4 // Mllt4 // Mllt4 // Mllt4	-0.06638	0.922924	-0.796399	0.054701	2.08422	0.730019	6	0	0	0	-0.659501	0.184931	-0.530178	-0.0783833	-0.679873	-0.307078	0.459128	0.426501	-0.728286	-0.642363	0.0545742	1.85616	0.343511	2.85085	1.29754	-0.697654	-0.760685	-0.734107	-0.818489	-0.8366
41505	TC1000002368.mm.1	---	0.113575	0.67146	-0.620072	0.0982757	2.82114	0.733646	6	0	0	0	1.16012	0.972796	-0.441594	-1.32011	-0.10966	2.39342	0.613076	-0.730056	-0.395667	-0.201984	0.0327474	-0.331393	-0.919681	0.638791	-1.71328	1.14178	1.07092	-0.727616	-0.597665	-0.534934
61949	TC1700002665.mm.1	Srbd1 // Srbd1 // Srbd1 // Srbd1 // Srbd1 // Srbd1 // Srbd1 // Srbd1 // Srbd1 // Srbd1 // Srbd1	0.229482	0.624694	-0.507208	0.457638	2.07902	0.73669	5	0	0	0	0.0594919	-0.071064	-0.157917	0.6533	-1.18352	1.67665	-1.48561	0.973401	0.0498603	-0.188065	0.321866	1.5922	2.1965	-1.01377	-0.778332	-0.232342	-0.891026	-0.216431	-1.03472	-0.270472
60573	TC1700001270.mm.1	Camkmt // Camkmt // Camkmt // Camkmt // Camkmt // Camkmt // Camkmt	0.496942	0.705857	-0.272391	0.252277	2.53104	0.769333	7	0	0	0	1.99256	-0.203777	0.0670053	0.495305	-0.0451613	-1.74163	-0.960142	-0.139375	0.228845	0.469592	0.433665	0.490702	0.952933	-2.76459	0.851526	0.658027	0.0316811	-0.009791	-0.29449	-0.512891
48786	TC1200002178.mm.1	Galc // Galc // Galc // Galc	-0.145003	0.243757	-0.916144	0.332973	3.61735	0.771141	2	0	0	0	-0.671664	0.0960622	-0.120973	-1.00002	-0.935856	-0.359698	-0.0256152	0.190056	-0.0650353	-0.129572	-0.0631169	-0.0607203	1.41739	3.09131	0.432984	-0.391857	1.34475	-0.550669	-1.20228	-0.99548
28456	TC0700004487.mm.1	Adam8 // Adam8 // Adam8 // Adam8 // Adam8 // Adam8 // Adam8 // Adam8 // Adam8 // Adam8 // Adam8 // Adam8 // Adam8 // Adam8 // Adam8 // Adam8 // Adam8 // Adam8 // Adam8	-0.020932	0.352093	-0.822515	0.360718	3.24332	0.801583	3	0	0	0	-0.236347	-0.408476	0.117531	-1.32204	-1.31182	-0.459037	-0.139278	-0.149358	-0.21706	0.268344	0.575203	-0.245719	2.43607	1.96227	-0.246232	0.331236	1.51226	-0.408258	-0.992078	-1.06721
6692	TC0200002876.mm.1	Camk1d // Camk1d // Camk1d // Camk1d // Camk1d // Camk1d // Camk1d // Camk1d // Camk1d // Camk1d // Camk1d // Camk1d	-0.0664109	0.806657	-0.874741	0.0703866	2.628	0.80833	6	0	0	0	-0.812544	-0.56821	1.55779	2.30469	0.894857	-1.07224	-0.0583531	0.135594	-0.181729	0.292571	-0.624682	-0.128072	1.43525	-0.96627	-0.485337	-0.508886	1.40979	-0.79627	-0.895646	-0.932306
14574	TC0400002064.mm.1	Gm10564	0.488634	1.14439	-0.341308	0.0920611	1.90444	0.829942	6	0	0	0	-0.0298005	-0.0970454	0.554925	0.313727	1.28129	0.336576	0.0242558	-1.50434	-0.310227	2.97538	0.486262	-0.159057	-1.00184	-0.89881	0.571475	-1.68025	0.161412	-0.401172	-0.235301	-0.387453
9027	TC0200005231.mm.1	---	0.312863	0.992314	-0.522737	0.259744	2.06868	0.835601	7	0	0	0	2.51808	-0.123936	-0.161344	-0.956357	-0.609014	1.35645	0.328161	1.99913	0.196759	-0.134796	-0.325134	0.220412	-0.467116	0.225654	-1.71653	-0.983048	0.200836	-0.269925	-0.788899	-0.509388
42545	TC1100000186.mm.1	Gm12029	0.178286	0.849683	-0.658209	0.00338851	2.60464	0.836495	6	0	0	0	1.86147	-0.607563	0.487124	-1.1016	-0.61846	-0.123388	0.0176573	-2.43766	0.146317	0.125461	-0.659124	-0.105687	0.313818	1.08052	1.17219	1.29957	1.12398	-0.661263	-0.658802	-0.654564
36966	TC0X00001787.mm.1	Hdac6 // Hdac6 // Hdac6 // Hdac6 // Hdac6 // Hdac6 // Hdac6 // Hdac6 // Hdac6 // Hdac6 // Hdac6 // Hdac6 // Hdac6 // Hdac6 // Hdac6 // Hdac6 // Hdac6 // Hdac6 // Hdac6 // Hdac6 // Hdac6 // Hdac6 // Hdac6 // Hdac6 // Hdac6 // Hdac6 // Hdac6 // Hdac6	0.223598	0.484165	-0.637476	0.328939	3.26495	0.861074	5	0	0	0	0.329397	1.23913	0.0419808	-0.806261	-1.65309	-0.611014	0.188611	0.557994	-0.188768	-0.139662	0.0534033	0.229701	3.14779	-0.97654	0.247727	-0.486216	0.738244	-0.787574	-0.260262	-0.864593
3307	TC0100003349.mm.1	4930562F07Rik // 4930562F07Rik // 4930562F07Rik // 4930562F07Rik // 4930562F07Rik // 4930562F07Rik	0.392318	1.03781	-0.492517	0.143871	2.20683	0.884834	6	0	0	0	2.56414	0.196762	0.0842883	-0.328256	-0.26593	-0.297793	-1.08102	1.54747	0.195758	0.597895	-0.696111	-0.196513	-1.11097	-0.666966	0.694615	-1.40805	1.64823	-0.329709	-0.5453	-0.602541
13097	TC0400000575.mm.1	Nipsnap3a // Nipsnap3a // Nipsnap3a // Nipsnap3a // Nipsnap3a // Nipsnap3a // Nipsnap3a // Nipsnap3a // Nipsnap3a	0.178531	0.708836	-0.713469	0.269576	2.87889	0.892001	7	0	0	0	0.561592	0.974924	-0.726418	-0.727778	1.4876	-0.636778	1.08572	-1.63492	-0.169229	1.10746	-0.429358	-0.0692554	-0.868763	-1.37607	1.49251	0.843192	1.22598	-0.978047	-0.439158	-0.723204
63924	TC1900000079.mm.1	Map3k11 // Map3k11 // Map3k11 // Map3k11 // Map3k11 // Map3k11 // Map3k11	-0.0477921	0.801212	-0.942245	0.359403	2.43654	0.894453	7	0	0	0	-0.151476	-0.354854	-0.217268	-0.59908	-1.0814	1.37747	-0.191408	0.561291	-0.527803	-0.65054	-0.149419	1.71682	2.74034	0.740202	0.15442	-0.591087	0.0505344	-1.32795	-0.616755	-0.882027
61293	TC1700002007.mm.1	Gm4246	-0.0162883	0.718879	-0.933918	0.136298	3.24393	0.91763	6	0	0	0	0.871683	0.575049	-0.815104	-0.352459	-0.191285	-0.404758	2.43419	0.0135106	-0.506668	-0.657517	0.743611	-0.325072	-0.312494	-0.156476	-1.02181	0.558973	2.34837	-0.777643	-0.995911	-1.0282
33027	TC0900001181.mm.1	Gm24178	0.418219	0.947167	-0.505564	0.0564578	2.5698	0.923783	6	0	0	0	1.94609	0.388165	0.284498	-1.53765	-0.914624	-0.0136346	-1.65285	-1.12953	0.0131889	1.36166	-0.820865	-0.245201	0.351345	0.907349	-0.0452212	1.41073	1.21325	-0.520956	-0.552729	-0.443006
47562	TC1200000939.mm.1	---	0.373198	0.930624	-0.558965	0.24225	2.46259	0.932163	7	0	0	0	0.159697	2.14846	0.065849	-0.960529	-0.255856	0.152603	1.06841	0.630406	0.763612	0.161283	-0.92671	0.240198	-0.21839	0.10661	-2.81446	0.275039	1.08067	-0.341112	-0.515937	-0.819846
62927	TC1800000827.mm.1	St8sia5 // St8sia5 // St8sia5 // St8sia5 // St8sia5 // St8sia5 // St8sia5 // St8sia5 // St8sia5 // St8sia5 // St8sia5	0.387247	0.754191	-0.563286	0.158927	3.17414	0.950533	7	0	0	0	0.77895	0.639144	-0.486421	-1.01906	0.463584	1.6259	0.535138	1.02437	-0.233224	1.75142	-0.0350834	0.295944	-1.96959	0.845026	-1.49727	-1.19928	0.170312	-0.616981	-0.384467	-0.688411
51154	TC1300001912.mm.1	---	0.172869	0.89363	-0.783062	0.272497	2.56554	0.95593	7	0	0	0	-0.339031	2.01549	0.0765044	0.961729	0.344402	1.25516	0.584739	0.106102	0.31038	-0.455907	0.267421	-0.664778	-0.219885	-1.64847	0.660734	-2.09996	1.19456	-0.837639	-0.487407	-1.02414
33930	TC0900002092.mm.1	Olfr984 // Olfr984 // Olfr984 // Olfr984	0.345575	0.756592	-0.613397	0.155527	3.19944	0.958972	7	0	0	0	0.0609536	0.249442	-0.188708	1.00298	0.288354	-0.435749	-1.85198	-1.02532	1.78651	0.940414	-0.195739	-0.233849	-1.42146	0.337301	2.07782	-0.562675	1.0119	-0.442911	-0.649758	-0.747523
59993	TC1700000688.mm.1	H2-Q10 // H2-Q10 // H2-Q10 // H2-Q10 // H2-Q10 // H2-Q10 // H2-Q10 // H2-Q10 // H2-Q10	0.114235	0.703793	-0.850949	0.34386	2.90784	0.965184	7	0	0	0	0.227663	1.50156	0.181908	-0.658631	-0.833385	-1.23239	0.493596	1.24827	-0.464753	0.0763064	-0.708284	-0.0147526	0.224718	1.44265	-1.66832	0.910546	1.82615	-0.572056	-0.745643	-1.23515
54073	TC1400002098.mm.1	Tgm1 // Tgm1 // Tgm1 // Tgm1 // Tgm1 // Tgm1 // Tgm1 // Tgm1 // Tgm1 // Tgm1 // Tgm1 // Tgm1 // Tgm1	0.494686	1.27367	-0.471717	0.307037	1.88382	0.966404	7	0	0	0	0.246616	0.384294	0.146713	-1.71715	-1.20052	-0.502937	-0.588323	-0.0687082	-0.0265194	-0.211934	3.31882	-0.395183	0.444598	-0.124073	0.939972	-0.00973772	0.779222	-0.490396	-0.155768	-0.768989
7737	TC0200003927.mm.1	Olfr1053 // Olfr1053 // Olfr1053 // Olfr1053	0.450417	0.888293	-0.51622	0.429138	2.31661	0.966637	7	0	0	0	2.02333	-0.0211642	0.354761	-0.835109	-0.148636	-0.917852	-1.93904	-1.01367	1.31312	0.0402977	-0.115795	-0.441629	-0.104223	0.208667	0.558648	2.19228	0.394679	-0.647057	-0.0368932	-0.86471
4655	TC0200000821.mm.1	Rif1 // Rif1 // Rif1 // Rif1 // Rif1 // Rif1 // Rif1 // Rif1 // Rif1 // Rif1 // Rif1 // Rif1 // Rif1 // Rif1 // Rif1 // Rif1 // Rif1 // Rif1 // Rif1 // Rif1 // Rif1 // Rif1 // Rif1	0.204843	1.00819	-0.766744	0.270996	2.35862	0.971587	7	0	0	0	-0.649706	-0.414137	-0.37778	-0.281442	-0.220286	-0.355449	-0.514658	0.0817071	0.0822191	-0.131577	0.639483	2.2854	2.92816	0.0810013	0.472919	-0.168634	-1.15699	-0.453836	-0.925594	-0.9208
62417	TC1800000313.mm.1	---	0.0611562	0.533803	-0.917677	0.34259	3.4644	0.978833	6	0	0	0	0.187894	-0.45592	0.196342	-0.306215	1.93732	1.42915	-1.76896	1.3176	0.108443	-0.520639	-0.158613	1.07059	0.550969	0.315184	0.495266	-1.75715	0.111778	-0.891988	-0.588654	-1.27239
55362	TC1500000532.mm.1	---	0.315356	0.950789	-0.672234	0.278891	2.50792	0.98759	7	0	0	0	1.95654	-0.00104676	0.92277	0.722692	-1.05841	-0.586845	-1.85209	0.970465	0.637038	0.0705723	-0.888961	-0.489424	-1.09291	0.72583	0.0749798	0.0962295	1.80928	-0.684109	-0.944998	-0.387595
6526	TC0200002708.mm.1	Vmn1r-ps1	0.378768	1.07542	-0.619681	0.145457	2.40559	0.998449	6	0	0	0	2.43591	0.103298	-0.0401898	-1.46708	0.0944565	-0.631598	-0.10306	0.365842	-0.342324	1.25758	-0.319268	-0.443629	-0.426557	-0.158398	-1.39045	2.07089	0.853619	-0.473442	-0.764343	-0.621258
20167	TC0500003477.mm.1	BC037034 // BC037034 // BC037034 // BC037034 // BC037034 // BC037034 // BC037034 // BC037034 // BC037034 // BC037034 // BC037034 // BC037034 // BC037034 // BC037034 // BC037034 // BC037034 // BC037034 // BC037034 // BC037034	0.460934	0.829862	-0.540086	0.115753	3.12137	1.00102	6	0	0	0	0.34306	0.318326	0.335911	-1.40255	-1.27691	-0.500397	0.612101	0.651378	0.707593	-0.234397	2.14094	-0.384893	1.26202	-0.220404	-0.239042	-1.98005	1.48757	-0.553964	-0.418019	-0.648275
7377	TC0200003565.mm.1	Gm13535	0.213921	1.00662	-0.787569	0.282515	2.41931	1.00149	7	0	0	0	2.2857	0.298034	-0.409079	-0.364656	-1.16968	-1.24897	1.37806	-1.10558	0.441815	-0.454363	-0.717647	0.0529846	0.15974	0.101675	0.388419	1.8602	0.866042	-0.96109	-0.461575	-0.940042
47903	TC1200001283.mm.1	4930427A07Rik // 4930427A07Rik // 4930427A07Rik // 4930427A07Rik // 4930427A07Rik	0.135388	0.824505	-0.866129	0.35919	2.67551	1.00152	7	0	0	0	0.286635	1.78839	-0.317066	-0.695373	-1.14536	0.492427	-0.0746771	2.04001	-0.28713	-0.832001	0.11109	0.1978	-0.448591	0.458497	-1.52885	1.0859	1.46669	-1.26931	-0.74881	-0.580268
29703	TC0800001078.mm.1	Lpcat2 // Lpcat2 // Lpcat2 // Lpcat2 // Lpcat2 // Lpcat2 // Lpcat2 // Lpcat2 // Lpcat2 // Lpcat2 // Lpcat2 // Lpcat2 // Lpcat2 // Lpcat2 // Lpcat2	0.164557	0.992883	-0.837198	0.444388	2.20361	1.00175	7	0	0	0	-0.0902004	0.525136	-1.10886	-1.11758	-2.0202	-0.117348	0.385911	0.390564	-0.122861	-0.131745	2.13439	-0.0539635	1.4238	0.75459	0.159735	0.0412385	1.45898	-0.462443	-1.32814	-0.721013
49990	TC1300000741.mm.1	LOC100861903	0.530035	0.843116	-0.472565	0.337041	2.68518	1.0026	7	0	0	0	2.23719	0.790147	0.188221	-0.711061	-0.452369	-1.15348	-0.145947	1.98888	0.306665	0.422586	-0.482452	0.247882	-0.992427	-0.266516	0.420745	-1.92893	0.948563	-0.756615	-0.100142	-0.560939
13062	TC0400000540.mm.1	Gm23746	0.189467	0.813992	-0.81933	0.52941	2.32612	1.0088	6	0	0	0	-0.400077	0.0243986	-0.0314239	0.311653	0.303857	-1.0197	-1.26987	-1.59145	-0.220336	1.88819	-0.441152	0.506671	0.00583292	1.74385	0.719682	1.80265	0.125219	-0.497586	-0.530051	-1.43035
56935	TC1500002126.mm.1	---	0.338401	0.844576	-0.687974	0.093124	3.1706	1.02637	6	0	0	0	1.92467	-0.0624253	0.229925	-0.425295	0.37827	-2.04139	0.265295	-0.990843	-0.616462	0.956075	0.0786186	-0.141597	-1.15862	-0.243093	0.77549	1.46785	1.66746	-0.58433	-0.764606	-0.714985
53609	TC1400001631.mm.1	---	0.491765	0.588721	-0.547177	0.272686	3.81153	1.03894	7	0	0	0	1.31496	0.607287	0.513242	-0.821877	-0.753041	0.0475789	-1.0991	-1.01347	0.894952	0.254876	-0.588653	0.445694	0.0488962	-0.17267	-1.56653	2.76124	0.768149	-0.809508	-0.566824	-0.265199
60045	TC1700000740.mm.1	Gm20525	0.359844	0.737169	-0.68016	0.0780502	3.68477	1.04	6	0	0	0	1.91151	0.554982	0.379825	-0.741082	-0.541579	0.0673825	-0.04288	2.33235	0.0369231	-0.18926	-0.151801	-0.0232731	-0.99488	-0.165065	0.127396	-1.98859	1.46852	-0.668094	-0.608846	-0.763541
28925	TC0800000293.mm.1	Mir486 // Mir486 // Mir486	0.508135	1.06136	-0.533487	0.347994	2.32164	1.04162	7	0	0	0	2.67798	0.877848	0.224995	-1.24997	-0.043845	-1.0733	0.559792	1.22086	0.181354	0.0735858	-0.697982	0.219157	-1.36498	-0.173894	0.329765	-1.26416	1.10325	-0.521265	-0.887431	-0.191766
48105	TC1200001488.mm.1	Gm20535 // RP24-370C21.2	0.542357	0.958071	-0.50166	0.241146	2.69105	1.04402	7	0	0	0	1.06102	0.677316	-0.24846	0.0229641	-0.851759	-0.46283	0.688598	0.819574	-0.312081	2.40834	0.0881331	0.122231	-1.90353	0.914291	-0.951448	-1.4983	0.93093	-0.381726	-0.779258	-0.343997
3613	TC0100003660.mm.1	---	0.562066	0.888492	-0.484809	0.0355845	3.11157	1.04687	6	0	0	0	0.130989	-0.129666	2.35687	0.223316	1.10775	-1.31738	-0.986852	-1.76277	0.0858803	1.13233	0.126685	0.231374	-1.02223	-0.546125	-0.167432	1.66519	0.326499	-0.488232	-0.518558	-0.447636
18345	TC0500001632.mm.1	Sap25 // Lrch4 // Lrch4 // Gm20605 // Lrch4 // Sap25 // Lrch4 // Lrch4 // Sap25 // Sap25 // Lrch4 // Lrch4 // Lrch4 // Lrch4 // Sap25 // Sap25 // Sap25 // Lrch4 // Lrch4 // Sap25 // Sap25 // Lrch4 // Lrch4 // Gm20605 // Lrch4 // Lrch4 // Lrch4 // Lrch4 // Lrch4 // Lrch4 // Lrch4 // Lrch4 // Sap25 // Sap25 // Sap25 // Sap25 // Sap25 // Sap25 // Lrch4 // Gm20605 // Lrch4	0.129393	0.367514	-0.918217	0.503573	3.25126	1.04761	2	0	0	0	-0.300329	0.369261	0.110244	-0.802549	-0.81977	-0.791812	-0.586526	-1.16295	0.635839	0.463633	-0.178745	-0.194151	1.31976	2.44843	1.01149	-0.352275	1.5851	-0.380897	-0.994392	-1.37936
63875	TC1900000030.mm.1	Coro1b // Coro1b // Coro1b // Coro1b // Coro1b // Coro1b // Coro1b // Coro1b // Coro1b // Coro1b // Coro1b // Coro1b // Coro1b // Coro1b // Coro1b // Coro1b // Coro1b // Coro1b // Coro1b // Coro1b // Coro1b // Coro1b // Coro1b	0.100324	0.505854	-0.947818	0.154319	4.96903	1.04814	7	0	0	0	0.117151	0.565362	-0.122266	-0.962338	-1.31958	0.944022	0.500665	0.198329	0.0460262	-0.464331	-0.384207	0.944531	1.88225	1.83174	-0.941522	-1.22467	1.2323	-0.938276	-1.10669	-0.798491
19647	TC0500002952.mm.1	Dgkq // Dgkq // Dgkq // Dgkq // Dgkq // Dgkq // Dgkq // Dgkq // Dgkq // Dgkq // Dgkq // Dgkq // Dgkq // Dgkq // Dgkq // Dgkq // Dgkq // Dgkq // Dgkq // Dgkq // Dgkq // Dgkq // Dgkq // Dgkq // Dgkq // Dgkq // Dgkq // Dgkq	0.219344	0.321781	-0.831973	0.192638	6.37903	1.05132	6	0	0	0	0.381378	0.468747	-0.190468	-0.318248	-0.674016	-1.32839	0.605271	1.24019	0.565798	-0.209206	0.0893825	0.429777	-1.47886	2.40449	-1.24875	0.335405	1.42342	-1.01872	-0.633942	-0.843254
17552	TC0500000833.mm.1	Gm9958 // Gm9958 // Gm9958	0.276871	0.869306	-0.774476	0.324034	2.78065	1.05135	7	0	0	0	-0.385836	-0.722946	0.0318665	-0.348484	1.94917	1.05177	1.35825	-1.05303	0.146417	0.131589	0.814489	1.92252	0.78998	-1.03927	-0.760588	-0.314386	-1.24808	-1.11386	-0.468362	-0.741205
31088	TC0800002475.mm.1	---	0.817589	0.717411	-0.237531	0.332745	3.17508	1.05512	7	0	0	0	1.19394	0.413033	0.936559	0.000796	-1.87148	-1.44937	-1.10856	0.396096	0.371012	2.20331	0.0590923	0.546188	-0.726366	1.37045	0.0535082	-0.695116	-0.980492	-0.612524	0.0224556	-0.122526
27031	TC0700003042.mm.1	Hps5 // Hps5 // Hps5 // Hps5 // Hps5 // Hps5 // Hps5 // Hps5 // Hps5 // Hps5 // Hps5 // Hps5 // Hps5 // Hps5 // Hps5 // Hps5 // Hps5 // Hps5 // Hps5 // Hps5 // Hps5 // Hps5 // Hps5 // Hps5 // Hps5 // Hps5 // Hps5 // Hps5 // Hps5 // Hps5 // Hps5 // Hps5 // Hps5 // Hps5 // Hps5 // Hps5 // Hps5 // Hps5 // Hps5 // Hps5 // Hps5	0.237584	0.684519	-0.82028	0.315836	3.3421	1.05786	7	0	0	0	0.152709	0.756603	0.247579	-0.355853	-0.310054	-0.970885	0.672254	0.717231	-1.02622	0.0836759	0.255386	1.19336	3.02543	-1.36317	-0.240844	-0.577648	0.201281	-0.607352	-0.670328	-1.18316
50458	TC1300001215.mm.1	---	0.518576	0.964295	-0.541866	0.46403	2.34434	1.06044	7	0	0	0	2.51439	0.340715	-0.0186218	-0.987568	0.0560052	1.5387	1.19949	0.0377727	-0.197088	0.985753	-0.0765204	0.0814029	0.0929206	-0.991748	-1.44201	-1.53885	0.0308568	-0.0744361	-0.548743	-1.00242
26421	TC0700002426.mm.1	Sae1 // Sae1 // Sae1 // Sae1 // Sae1 // Sae1 // Sae1 // Sae1 // Sae1	0.591998	0.684737	-0.482273	0.284559	3.50441	1.07427	7	0	0	0	0.508468	0.917917	0.390539	-1.13129	-0.714691	-0.143499	-1.53912	1.42395	0.235478	-0.494133	0.862624	1.72309	1.95894	-1.57291	-0.274585	-0.226505	-0.477457	-0.737201	-0.534344	-0.175274
7903	TC0200004093.mm.1	---	0.272929	0.868605	-0.803993	0.154894	3.16496	1.07692	6	0	0	0	0.328263	1.98792	0.0109995	-1.18721	-1.31346	-0.23164	-0.639606	-0.458394	0.668862	-0.670586	-0.155301	-0.259648	1.85156	0.251479	0.777878	-0.500913	1.95179	-0.941248	-0.636053	-0.834678
23309	TC0600002903.mm.1	Rad18 // Rad18 // Rad18 // Rad18 // Rad18 // Rad18 // Rad18 // Rad18 // Rad18 // Rad18 // Rad18 // Rad18 // Rad18 // Rad18 // Rad18 // Rad18 // Rad18 // Rad18 // Rad18 // Rad18 // Rad18 // Rad18 // Rad18 // Rad18 // Rad18 // Rad18 // Rad18	0.121698	1.05781	-0.964287	0.0809699	2.69784	1.08598	6	0	0	0	-0.375198	0.309949	-0.905727	-1.33146	-1.02179	-0.229639	0.429187	0.257935	-0.787796	-0.363371	2.02793	0.946095	1.38305	0.908017	1.61994	-0.657106	0.682838	-0.974888	-0.878538	-1.03943
43005	TC1100000650.mm.1	Gm12237	0.566686	0.906741	-0.519998	0.371428	2.68796	1.08668	7	0	0	0	2.34778	0.566337	0.103069	-0.535577	-0.542118	0.417383	0.565613	0.803643	0.516468	0.675125	-0.662182	0.420208	-0.933523	0.269151	-2.77985	0.542219	-0.213744	-0.187709	-0.45131	-0.920975
51539	TC1300002301.mm.1	D630045M09Rik // D630045M09Rik // D630045M09Rik	0.422105	0.852889	-0.665999	0.56217	2.37862	1.0881	5	0	0	0	2.25386	0.408562	-0.0562282	0.0100381	-1.17593	-1.55162	-0.0329231	1.39837	0.560843	0.0712178	-0.172989	-0.110529	-1.05607	0.512746	-1.10049	0.308823	1.73031	-1.22222	-0.0980633	-0.677714
47788	TC1200001167.mm.1	Mir411 // Mir411 // Mir411	0.481991	1.11976	-0.60641	0.232463	2.45136	1.0884	7	0	0	0	1.72863	-0.216622	2.30038	-0.689007	-0.428844	0.14711	0.764402	-1.23463	0.573334	-0.029843	-0.564358	-0.417587	-0.256887	0.421119	-1.99432	1.13828	0.578067	-0.75292	-0.338373	-0.727938
33401	TC0900001560.mm.1	4933432G23Rik // 4933432G23Rik // 4933432G23Rik	0.328001	1.04322	-0.763085	0.524495	2.19463	1.09109	7	0	0	0	2.42188	-0.146072	-0.208583	-0.824233	-0.321001	-0.348531	0.126256	0.851825	-0.250722	1.04444	-0.422599	-0.142333	-1.0928	0.728629	-1.3288	0.136694	2.06521	-0.186894	-0.889632	-1.21273
11757	TC0300002477.mm.1	---	0.0551324	0.890636	-1.03648	0.309325	2.86462	1.09162	7	0	0	0	-0.671186	0.809948	0.807451	0.712004	-0.998763	-0.114264	1.44867	0.54415	-0.971101	-0.147773	-0.69572	1.25431	1.31764	1.63883	-1.5176	-0.399111	0.0919699	-0.708744	-1.07738	-1.32332
52062	TC1400000057.mm.1	Gm3275	0.334061	0.947667	-0.758822	0.620744	2.1569	1.09288	5	0	0	0	2.39501	0.233696	0.252422	-1.11348	0.255962	0.234092	-0.169743	-0.997129	-0.000575	-0.0129429	-0.560407	0.0312221	-1.16343	0.312878	-0.744348	2.12074	1.20251	-0.0530542	-1.00335	-1.22006
35786	TC0X00000590.mm.1	Gm14668	0.518628	0.479323	-0.582573	0.303807	4.36697	1.1012	6	0	0	0	0.363396	0.111257	1.35253	-1.03377	-0.256981	0.296986	0.681466	0.435575	0.799845	0.350616	-0.0684874	0.72124	-0.395201	1.80134	-2.83751	0.434282	-1.00885	-0.493857	-0.333	-0.920863
33181	TC0900001336.mm.1	Mirlet7g // Mirlet7g // Mirlet7g	0.345869	1.02703	-0.758829	0.45386	2.35873	1.1047	7	0	0	0	2.39455	-0.11893	0.878942	-0.723517	-0.271722	-1.39111	-0.410306	0.956519	0.288457	-0.346195	-0.66509	-0.010656	-1.17662	1.43941	0.45381	-0.494725	1.47366	-0.528572	-1.28166	-0.466251
62896	TC1800000795.mm.1	---	0.350504	0.790397	-0.75449	0.135783	3.5777	1.10499	6	0	0	0	0.978905	1.48009	0.284566	-0.507811	0.567527	-1.77766	-1.17503	-0.0232069	0.337182	0.657673	-0.700468	-0.58442	-0.964063	-0.191005	0.341681	2.06896	1.47055	-0.67877	-0.673452	-0.911249
17115	TC0500000395.mm.1	Hmx1 // Hmx1 // Hmx1 // Hmx1 // Hmx1 // Hmx1 // Hmx1 // Hmx1	0.662868	1.34175	-0.447946	0.156579	2.15639	1.11081	6	0	0	0	0.417452	0.952275	0.0760699	-0.350244	-1.106	-0.685783	0.358435	-1.11314	-0.0686294	3.53134	-0.508022	0.239594	0.308272	0.468948	-0.119383	-0.97567	-0.0816795	-0.582474	-0.27607	-0.485293
63522	TC1800001428.mm.1	Pcyox1l // Pcyox1l // Pcyox1l // Pcyox1l // Pcyox1l // Pcyox1l // Pcyox1l // Pcyox1l	0.973756	0.548319	-0.141086	0.457009	3.32279	1.11484	4	0	0	0	1.54536	1.31339	0.645589	-0.301924	-0.655086	0.569577	-1.00334	-1.06633	0.868373	1.63979	0.132261	0.671536	-0.832797	-1.7222	0.811038	-1.52789	-0.66407	-0.658228	0.0264887	0.20848
31101	TC0800002488.mm.1	Gm7901 // Gm5847	0.454767	0.570606	-0.663989	0.171817	4.71276	1.11876	7	0	0	0	0.34519	1.62254	0.258744	-1.75582	-1.73748	-1.22232	0.785919	-0.0902248	0.120103	0.516404	0.513795	-0.19341	1.10094	0.966438	-0.781186	-0.241194	1.78353	-0.856221	-0.610374	-0.525373
42535	TC1100000176.mm.1	Gm23093	0.679006	0.760267	-0.450703	0.253683	3.50267	1.12971	7	0	0	0	1.12374	2.0396	0.455866	-0.126719	-0.485669	1.08953	0.153578	-1.70622	0.231583	0.939091	-0.272028	0.235202	-1.73588	0.193369	-0.223269	-1.68261	1.12296	-0.743054	-0.320435	-0.288618
30020	TC0800001398.mm.1	Gan // Gan // Gan // Gan // Gan // Gan // Gan	0.782786	0.625925	-0.34797	0.548078	2.862	1.13076	4	0	0	0	0.616241	1.68047	0.205355	-0.938589	-1.83937	-1.38875	-0.872563	-1.09966	0.952143	1.51681	0.0846621	0.423827	1.08876	0.712979	0.880223	-0.111734	-0.866888	0.270304	-0.540091	-0.774123
10619	TC0300001324.mm.1	---	0.243139	0.809468	-0.887881	0.387824	2.98318	1.13102	7	0	0	0	1.59895	0.494592	0.273251	-1.0308	-0.474036	-1.03237	-1.36216	0.425352	0.363298	-0.424791	-0.99983	0.396498	-0.291267	0.757334	2.37918	0.706023	0.884407	-1.16957	-1.04852	-0.445547
5467	TC0200001638.mm.1	Gm13961	0.364579	0.492031	-0.768207	0.467533	3.45581	1.13279	4	0	0	0	0.275826	0.43853	0.414796	0.735884	-0.895621	1.81006	0.736685	-1.92989	0.0661084	-0.289153	0.32297	1.32297	1.57711	-1.23646	-1.03849	0.459066	-0.465779	-1.18317	-0.261656	-0.859798
14832	TC0400002323.mm.1	---	0.514371	1.10339	-0.624545	0.171914	2.65674	1.13892	6	0	0	0	2.2386	-0.17573	1.04693	0.250982	-0.0910946	0.721012	-0.939193	-0.405023	-0.133634	1.58429	-0.602538	-0.357316	-0.828575	-0.636293	0.834127	-1.89588	1.26297	-0.750714	-0.694183	-0.428736
46247	TC1100003914.mm.1	Limd2 // Limd2 // Limd2 // Limd2 // Limd2 // Limd2 // Limd2 // Limd2 // Limd2 // Limd2 // Limd2 // Limd2 // Limd2	0.397258	0.777851	-0.743257	0.252116	3.47654	1.14051	7	0	0	0	-0.113398	0.391535	-0.170442	-0.838998	-0.328434	0.586269	-1.86349	0.914414	0.171115	0.380214	2.08923	0.0325477	0.926248	-1.06693	-1.00344	0.123862	1.99946	-0.539367	-1.02516	-0.665245
42495	TC1100000135.mm.1	---	0.37382	0.893666	-0.767117	0.292033	3.02222	1.14094	7	0	0	0	0.789713	1.10085	-0.328367	-1.21003	-1.21575	1.14298	-0.422497	-0.65298	-0.190521	1.89061	-0.261065	-0.384479	0.374709	1.25539	-1.53721	0.495503	1.45449	-0.868597	-0.994873	-0.437882
25332	TC0700001328.mm.1	Gm5899	0.431075	1.0388	-0.710181	0.178016	2.81194	1.14126	6	0	0	0	2.29862	1.16782	-0.92592	-1.31303	-1.2125	-1.45455	-0.663452	1.42733	-0.262616	0.135349	0.3223	0.281968	0.091684	-0.0403574	0.647554	0.588992	1.04136	-0.504933	-0.803072	-0.822539
48352	TC1200001739.mm.1	1700060O08Rik	0.26166	1.00868	-0.883581	0.499047	2.39653	1.14524	7	0	0	0	2.33042	0.723276	0.0906888	-0.515297	-0.506227	0.507421	1.37126	1.26539	-0.123016	-0.269332	-0.695179	-0.225236	0.0376445	-0.536706	-0.506138	-1.68614	1.38792	-0.33573	-1.00277	-1.31224
6400	TC0200002579.mm.1	Ddx27 // Ddx27 // Ddx27 // Ddx27 // Ddx27 // Ddx27 // Ddx27 // Ddx27 // Ddx27 // Ddx27 // Ddx27 // Ddx27 // Ddx27 // Ddx27 // Ddx27 // Ddx27 // Ddx27	0.466817	1.08423	-0.681516	0.11553	2.76578	1.14833	6	0	0	0	0.087351	0.918013	-1.46784	-1.10716	-1.79309	0.0928969	-0.910734	0.188725	0.265655	0.264214	1.20492	1.9954	1.56998	0.449642	0.851049	-0.0215818	-0.542893	-0.595003	-0.636831	-0.812715
29324	TC0800000693.mm.1	Nat1 // Nat1 // Nat1 // Nat1 // Nat1 // Nat1	0.539134	0.864473	-0.610764	0.199524	3.31907	1.1499	7	0	0	0	2.33469	0.222614	0.313443	0.80899	-1.52359	0.971039	-0.756671	0.980317	0.382835	0.825706	-0.00274118	-0.302613	-1.083	-0.627166	-1.43061	-0.630192	1.34924	-0.567148	-0.828488	-0.436657
22973	TC0600002565.mm.1	Mthfd2 // Mthfd2 // Mthfd2 // Mthfd2 // Mthfd2 // Mthfd2 // Mthfd2 // Mthfd2 // Mthfd2 // Mthfd2 // Mthfd2 // Mthfd2	0.21722	0.722895	-0.933299	0.200515	3.87717	1.15052	7	0	0	0	0.0343423	1.068	-0.0863645	-1.33178	-1.06258	-0.0590364	0.417279	-0.0122523	-0.14719	-0.313777	1.41289	-0.447356	2.37148	-0.686873	0.0734788	-0.316819	1.88647	-0.882464	-0.763095	-1.15434
40700	TC1000001558.mm.1	---	0.531058	1.0411	-0.621501	0.255704	2.74236	1.15256	7	0	0	0	2.5537	-0.12239	0.606747	-0.357171	0.0327621	-0.684298	-1.2268	1.39511	0.438636	0.739765	-0.844825	0.345768	-0.871084	0.302741	1.10356	-1.75332	0.205599	-0.32624	-0.769476	-0.768788
13234	TC0400000714.mm.1	---	0.692519	0.476388	-0.462025	0.248122	5.01774	1.15454	7	0	0	0	0.880348	0.538184	0.638223	-1.27185	-0.378915	0.163264	0.121546	-1.26396	0.198236	0.155987	1.54582	0.890841	-0.258576	-1.11298	-1.74282	2.40015	-0.117417	-0.40474	-0.733779	-0.247555
4468	TC0200000634.mm.1	Cntrl // Cntrl // Cntrl // Cntrl // Cntrl // Cntrl // Cntrl // Cntrl // Cntrl // Cntrl // Cntrl // Cntrl // Cntrl // Cntrl // Cntrl // Cntrl // Cntrl // Cntrl // Cntrl // Cntrl // Cntrl // Cntrl // Cntrl // Cntrl // Cntrl // Cntrl // Cntrl // Cntrl // Cntrl // Cntrl // Cntrl // Cntrl	0.184112	0.994511	-0.97598	0.071241	3.06794	1.16009	6	0	0	0	-0.0991437	1.13477	-0.661296	-0.996227	-0.915372	-0.873976	0.843453	-0.184064	-0.365689	-0.115077	-0.590115	1.98533	2.10373	1.1096	0.200333	0.832459	-0.48077	-0.967404	-0.909416	-1.05112
38873	TC0Y00000282.mm.1	Gm21763	0.486421	0.559697	-0.674623	0.480756	3.32687	1.16104	4	0	0	0	0.163103	1.47606	0.325229	-0.349859	-1.0117	0.996554	-0.894702	-1.67312	0.177027	-0.123237	0.364302	1.02247	-0.81576	0.108108	2.59296	-0.636617	0.303062	-1.2067	-0.545683	-0.271485
25051	TC0700001045.mm.1	Gm24880	0.503569	0.982595	-0.659092	0.518217	2.4379	1.16266	7	0	0	0	2.11813	0.621127	-0.247656	-0.572252	-0.733036	0.483814	0.563908	0.69155	0.0251875	1.57255	-0.253571	-0.31078	-0.977824	-0.0699021	-0.144113	-2.18417	1.39432	-0.894065	-0.0650142	-1.0182
27619	TC0700003638.mm.1	---	0.409582	0.879746	-0.753212	0.40453	2.86162	1.16279	7	0	0	0	2.19959	0.3321	-0.0115418	-0.47353	0.627046	-0.719862	2.5488	-1.03496	-0.282915	0.861844	-0.215123	-0.0168842	-1.30499	-0.535199	-0.41569	0.206098	0.494843	-0.429704	-0.623157	-1.20677
33556	TC0900001716.mm.1	---	0.343129	1.08174	-0.825185	0.376099	2.52368	1.16831	7	0	0	0	2.62859	-0.00306444	0.322674	-0.391992	-0.0410141	0.403941	1.35656	-1.31154	0.549554	-0.113407	-0.621574	-0.360872	0.521375	-0.98006	-1.22085	0.269235	1.468	-0.402345	-1.12237	-0.950844
59879	TC1700000564.mm.1	Cyp4f16 // Cyp4f16 // Cyp4f16 // Cyp4f16 // Cyp4f16 // Cyp4f16 // Cyp4f16 // Cyp4f16 // Cyp4f16 // Cyp4f16 // Cyp4f16 // Cyp4f16 // Cyp4f16 // Cyp4f16 // Cyp4f16 // Cyp4f16 // Cyp4f16 // Cyp4f16 // Cyp4f16 // Cyp4f16 // Cyp4f16 // Cyp4f16 // Cyp4f16 // Cyp4f16 // Cyp4f16	0.494605	0.655182	-0.675138	0.3215	3.77971	1.16974	7	0	0	0	0.0668331	1.76639	0.180827	-0.655417	-1.94137	-1.38391	1.89637	-0.848723	-0.252812	0.604308	0.324448	0.772242	0.593714	0.996855	0.37676	-0.980017	0.508911	-0.304825	-0.837636	-0.882952
1838	TC0100001858.mm.1	Nek2 // Nek2 // Nek2 // Nek2 // Nek2 // Nek2 // Nek2 // Nek2 // Nek2 // Nek2 // Nek2 // Nek2 // Nek2 // Nek2 // Nek2 // Nek2	0.371106	0.879799	-0.80261	0.154825	3.40862	1.17372	6	0	0	0	0.138345	1.13703	0.0213106	-1.23663	-1.82027	-0.854143	-0.377371	1.31943	-0.595469	-0.71429	1.19837	1.41245	1.53085	-0.215717	1.23075	0.00765164	0.225535	-0.909442	-0.873335	-0.625053
65800	TSUnmapped00000030.mm.1	H60a	0.305613	0.959473	-0.87209	0.266972	2.98876	1.1777	7	0	0	0	-0.869429	0.195248	1.0088	-1.51421	-0.642197	-0.7564	-0.145457	-0.209925	-0.264776	0.66911	1.89753	-0.497191	1.79748	0.790727	0.258867	-0.719157	1.61725	-0.563972	-1.0177	-1.0346
17486	TC0500000767.mm.1	---	0.760458	0.879892	-0.417538	0.514195	2.64246	1.178	6	0	0	0	1.01001	-0.442333	1.96479	0.659049	1.49257	-0.533881	-1.51883	-0.31661	0.118773	1.78873	0.523634	0.359607	-1.47725	-1.04056	-0.552131	-0.501491	-0.281459	0.170017	-0.637282	-0.785349
5735	TC0200001909.mm.1	Snrnp200 // Snrnp200 // Snrnp200 // Snrnp200 // Snrnp200 // Snrnp200 // Snrnp200 // Snrnp200 // Snrnp200 // Snrnp200 // Snrnp200 // Snrnp200 // Snrnp200 // Snrnp200	0.332696	1.04232	-0.847232	0.167458	2.90874	1.17993	6	0	0	0	-0.653057	-0.038631	-0.60932	-0.785339	-0.458865	-1.26588	-0.281407	1.09531	0.60168	0.0653027	0.549116	2.41378	1.28643	1.7574	0.262373	-0.707687	-0.689507	-0.868223	-1.00321	-0.670268
38363	TC0X00003204.mm.1	Mageh1 // Mageh1 // Mageh1 // Mageh1 // Mageh1 // Mageh1 // Mageh1 // Mageh1	0.7257	0.542202	-0.458825	0.168686	5.22052	1.18453	7	0	0	0	0.746771	0.0136761	0.80983	-0.481316	-1.20907	-0.996965	-1.18927	-1.0705	0.565012	1.66011	0.23205	1.05245	-0.737136	1.75294	1.70185	-0.822464	-0.651499	-0.65359	-0.359215	-0.36367
24762	TC0700000755.mm.1	EU599041 // EU599041 // EU599041 // EU599041 // EU599041	0.206009	0.405581	-0.979369	0.193519	6.249	1.18538	7	0	0	0	0.524404	-0.573962	0.711979	-1.81973	0.246763	-1.73227	0.816296	-0.945722	0.304524	0.150824	0.113972	0.210326	1.18367	1.08778	-0.212586	1.63153	1.2403	-0.816494	-0.928316	-1.1933
21534	TC0600001115.mm.1	---	0.610605	0.995309	-0.577124	0.277509	2.90477	1.18773	7	0	0	0	2.53512	-0.0350925	0.681223	-0.0488734	0.0539894	1.30347	0.492659	-0.344247	1.14185	-0.2043	-0.312106	0.467534	-1.31269	-0.351441	-0.643579	-2.17554	0.483384	-0.838959	-0.286228	-0.606185
4798	TC0200000964.mm.1	Gm13602	0.425278	0.573065	-0.764963	0.180535	4.95165	1.19024	7	0	0	0	1.31265	0.46932	-0.301692	-1.002	-0.951958	2.03702	-1.84904	0.433475	0.350769	0.223851	-0.0884678	1.01052	-0.95274	1.80026	0.0330314	0.108641	-0.338752	-0.661184	-0.660279	-0.973427
58884	TC1600001742.mm.1	Nfkbiz // Nfkbiz // Nfkbiz // Nfkbiz // Nfkbiz // Nfkbiz // Nfkbiz // Nfkbiz // Nfkbiz // Nfkbiz // Nfkbiz // Nfkbiz // Nfkbiz // Nfkbiz // Nfkbiz // Nfkbiz // Nfkbiz // Nfkbiz // Nfkbiz	0.431346	0.855254	-0.759654	0.243382	3.37896	1.191	7	0	0	0	0.185914	1.00659	-0.677042	-1.88249	-1.63914	0.645348	-0.845424	-0.0401174	-0.0975563	0.190404	1.99057	0.420543	1.15413	0.694941	0.944407	-0.711578	0.93945	-0.572118	-1.03469	-0.672155
49490	TC1300000240.mm.1	Hist1h2ad // Hist1h3b // Hist1h3d // Hist1h2ad // Hist1h3b // Hist1h3d // Hist1h2ad // Hist1h2ad // Hist1h2ai // Hist1h3b // Hist1h3d // Hist1h2ad // Hist1h3b // Hist1h3d // Hist1h2ad // Hist1h3d // Hist1h3b	0.498507	0.713858	-0.695261	0.204983	4.0518	1.19377	7	0	0	0	1.75907	0.53778	-0.490776	-1.6668	-1.69483	-0.662133	-1.16669	0.359279	0.402738	-0.118373	0.793802	0.60531	1.24371	0.042137	1.85166	-0.0422398	0.332151	-0.87924	-0.732238	-0.474307
64689	TC1900000847.mm.1	Eno4 // Eno4 // Eno4 // Eno4 // Eno4	0.347889	1.0779	-0.852528	0.337603	2.65794	1.20042	7	0	0	0	2.43355	0.207073	-0.20143	-1.34984	-0.667628	0.99981	0.607066	-0.270508	-0.161249	1.13116	-0.358428	-0.615449	0.0116163	-0.605755	0.471343	-0.959179	1.88543	-1.20125	-0.527271	-0.82906
23747	TC0600003348.mm.1	Gm25434	0.438515	1.05275	-0.7633	0.0729344	3.00359	1.20182	6	0	0	0	1.89201	-0.0184198	2.02395	-0.981566	-0.674691	-0.834477	-0.361388	0.209447	-0.396337	-0.356548	-0.164768	0.0897196	-0.347428	0.552433	-1.35786	1.77146	1.24435	-0.847018	-0.729373	-0.713509
5457	TC0200001628.mm.1	Ccdc34 // Ccdc34 // Ccdc34 // Ccdc34 // Ccdc34 // Ccdc34 // Ccdc34 // Ccdc34 // Ccdc34 // Ccdc34 // Ccdc34 // Ccdc34 // Ccdc34 // Ccdc34 // Ccdc34 // Ccdc34 // Ccdc34 // Ccdc34 // Ccdc34 // Ccdc34	0.429651	0.767605	-0.773134	0.318991	3.50007	1.20279	7	0	0	0	0.0735176	0.415861	-0.217188	-0.910542	-0.653703	-0.709557	0.790711	-1.07278	0.0342872	0.154701	0.456224	2.09015	2.42005	0.330045	0.970702	-1.01321	-0.839862	-0.628346	-0.552216	-1.13884
15453	TC0400002948.mm.1	---	0.583131	0.820832	-0.619815	0.17957	3.6775	1.20295	7	0	0	0	0.392146	-0.094728	0.314005	-0.0966278	-0.580223	0.997051	-0.637491	-0.77016	1.54291	1.92449	-0.195031	0.198121	0.571811	0.255059	0.488552	-2.86647	0.416034	-0.827142	-0.518813	-0.51349
18935	TC0500002229.mm.1	Poln // Poln // Haus3 // Poln // Poln // Haus3 // Haus3 // Haus3 // Haus3 // Poln // Poln // Haus3 // Poln // Poln // Poln // Haus3 // Poln // Haus3	0.374695	0.940992	-0.828476	0.399033	2.83929	1.20317	7	0	0	0	0.417484	0.305167	0.638792	-1.25289	-0.427504	0.362224	-0.503751	-0.594256	-0.226202	2.27036	-0.623807	-0.15893	0.676437	1.90481	-1.27272	-0.425906	1.39613	-1.03131	-0.36877	-1.08535
12487	TC0300003216.mm.1	Hist2h3c1 // Hist2h3c1 // Hist2h3c1 // Hist2h3c2 // Hist2h3c2 // Hist2h3b // Hist2h3c1 // Hist2h3c1	0.887944	0.80754	-0.315446	0.397038	3.15259	1.20339	7	0	0	0	0.772682	2.43	0.578949	-1.2553	-0.919627	-0.770019	-2.04738	0.377574	0.154865	1.11791	0.0119126	1.14929	0.820369	-0.156557	-0.103994	-0.324327	-0.890014	0.12818	-0.437078	-0.637439
38155	TC0X00002995.mm.1	Gla // Gla // Gla // Gla // Gla // Gla // Gla // Gla	0.114976	0.573922	-1.09357	0.171873	5.0664	1.20855	7	0	0	0	0.615329	1.06595	0.215826	-1.62424	-0.572568	-1.21123	1.52104	0.641153	-0.28937	-0.624658	0.00462353	-0.182871	0.00349235	2.01246	-0.0812067	0.406959	1.38002	-1.04789	-0.949152	-1.28367
2442	TC0100002469.mm.1	2810408I11Rik // 2810408I11Rik // 2810408I11Rik	0.568038	0.875425	-0.645491	0.517434	2.72221	1.21353	6	0	0	0	2.32067	0.599162	0.430849	-1.59126	-0.92071	-1.30203	0.767826	1.34771	0.648661	0.03412	-0.530195	0.473001	-0.526892	0.867711	-0.995411	-0.47828	0.791545	-0.304845	-1.24091	-0.390716
65075	TC1900001236.mm.1	---	0.628911	0.754763	-0.586429	0.19292	3.9685	1.21534	7	0	0	0	0.610459	0.160405	0.230399	-0.785455	-0.839481	2.00895	-1.04987	-0.224854	0.855901	0.169941	2.22514	0.150132	-1.37378	0.0727669	0.391121	-1.6037	0.761214	-0.806121	-0.508517	-0.444649
9592	TC0300000283.mm.1	Spata5 // Spata5 // Spata5 // Spata5 // Spata5 // Spata5 // Spata5 // Spata5 // Spata5 // Spata5 // Spata5 // Spata5 // Spata5 // Spata5 // Spata5 // Spata5 // Spata5 // Spata5 // Spata5 // Spata5 // Spata5 // Spata5 // Spata5 // Spata5	0.644992	1.02157	-0.580923	0.444002	2.64512	1.22592	7	0	0	0	0.11714	0.940745	-0.744305	-1.64137	-0.737856	0.0221089	-0.116172	0.407139	0.251856	0.0385363	1.8913	2.01967	1.20434	-1.13543	-1.20205	0.815863	-0.388749	-0.400987	-1.08665	-0.255133
16601	TC0400004106.mm.1	---	0.451975	0.834768	-0.775216	0.392153	3.16008	1.22719	7	0	0	0	2.28872	-0.00878851	0.203196	-0.300191	-1.27456	-2.13342	0.652173	-0.747195	-0.185079	0.412491	0.336781	0.116507	-0.188586	-0.109238	0.638205	1.5669	1.05775	-0.334089	-1.08432	-0.907241
7166	TC0200003354.mm.1	Phf19 // Phf19 // Phf19 // Phf19 // Phf19 // Phf19 // Phf19 // Phf19 // Phf19 // Phf19 // Phf19 // Phf19 // Phf19	0.302894	1.18523	-0.928269	0.109783	2.72119	1.23116	6	0	0	0	-0.19953	0.358506	-0.390121	-0.912468	-1.0198	1.08584	-0.829364	-0.233867	-0.525161	-0.91711	2.36451	1.42916	1.43188	-0.395118	0.992144	-0.0326453	0.577944	-1.04029	-0.820872	-0.923644
8896	TC0200005098.mm.1	---	0.36173	0.74039	-0.870205	0.496045	3.07666	1.23194	5	0	0	0	0.215243	0.583533	-0.220181	-0.754049	0.657997	0.666633	-1.41455	-0.633862	0.367166	1.87113	0.0735006	-0.358275	-0.647543	0.807277	1.84338	-1.56755	1.12078	-1.06283	-0.30674	-1.24105
21590	TC0600001172.mm.1	---	0.941207	0.790935	-0.291045	0.1104	4.03138	1.23225	6	0	0	0	2.28193	0.689947	1.4867	-0.987948	-0.67367	-1.85216	-0.751613	-1.15649	0.613889	1.04289	-0.255732	0.728831	0.529718	-1.24097	0.399977	0.117105	-0.0992584	-0.2082	-0.416377	-0.248557
50029	TC1300000781.mm.1	Cdk20 // Cdk20 // Cdk20 // Cdk20 // Cdk20	0.540171	0.749626	-0.698707	0.476165	3.13811	1.23888	6	0	0	0	0.556268	1.74763	0.0851778	-0.136377	-1.76838	1.72619	-1.137	-1.54757	0.238187	1.38055	-0.279008	0.0523945	-0.195045	-0.184998	1.18647	0.57668	-0.205047	-1.20984	-0.267667	-0.618616
16734	TC0500000012.mm.1	n-R5s169	0.334247	0.798414	-0.904719	0.266645	3.65723	1.23897	7	0	0	0	1.85101	0.0441677	-0.721626	-1.0594	-0.252472	0.310142	-2.04742	1.00267	0.510717	0.219903	0.574052	-0.138491	-0.486486	-0.213169	-0.0270971	1.77275	1.37491	-0.695082	-1.20483	-0.814246
11651	TC0300002370.mm.1	Ints3 // Ints3 // Ints3 // Ints3 // Ints3 // Ints3 // Ints3 // Ints3 // Ints3 // Ints3	0.506988	1.22388	-0.732252	0.108315	2.6548	1.23924	6	0	0	0	-0.68639	0.288199	0.0464014	-0.376538	-0.748691	-1.23764	0.000663	0.326721	0.110739	-0.596884	2.53945	1.8474	1.75262	-0.756802	-0.0565711	0.401281	-0.657209	-0.610651	-0.767712	-0.818393
18244	TC0500001530.mm.1	Tyw1 // Tyw1 // Tyw1 // Tyw1 // Tyw1 // Tyw1 // Tyw1 // Tyw1 // Tyw1 // Tyw1 // Tyw1 // Tyw1 // Tyw1 // Tyw1 // Tyw1 // Tyw1	0.470404	0.84992	-0.770392	0.391974	3.15765	1.2408	7	0	0	0	0.0536942	0.333756	-0.139395	-1.02789	-0.801701	-2.19271	0.467286	1.11782	0.504118	-0.239053	2.2772	0.502506	0.347599	-0.88456	-0.0698384	1.12899	0.933361	-0.985515	-1.0077	-0.317961
20772	TC0600000344.mm.1	Nup205 // Nup205 // Nup205 // Nup205 // Nup205 // Nup205 // Nup205 // Nup205 // Nup205	0.350719	1.15908	-0.891313	0.0573284	2.82704	1.24203	6	0	0	0	-0.774398	0.256153	-0.371366	-0.564933	-1.11018	-0.107771	0.319449	0.334199	-0.175191	-0.436227	2.1683	1.78776	2.31133	-0.258974	-0.189835	0.151265	-0.665635	-0.932485	-0.825836	-0.915617
42250	TC1000003117.mm.1	Shmt2 // Shmt2 // Shmt2 // Shmt2 // Shmt2 // Shmt2 // Shmt2 // Shmt2 // Shmt2	0.766267	1.05556	-0.477413	0.222539	2.9672	1.24368	7	0	0	0	0.748105	0.814998	-0.891888	-0.598472	-1.42589	-0.900546	-0.514217	0.581033	0.508916	0.207771	2.52173	1.45424	0.690337	-1.14035	0.288252	0.363164	-1.27495	-0.573698	-0.222945	-0.635596
60167	TC1700000862.mm.1	Aars2 // Aars2 // Aars2 // Aars2 // Aars2 // Aars2 // Aars2 // Aars2	0.642209	1.00447	-0.60362	0.16587	3.18182	1.24583	6	0	0	0	1.65992	-0.108253	1.68418	-0.0951444	-0.843562	-0.235196	0.100218	-2.40781	1.73049	0.260626	-0.425779	-0.305716	0.663123	-0.669531	0.777347	-0.63315	0.659106	-0.616598	-0.431641	-0.762619
33705	TC0900001867.mm.1	Cdkn2d // Cdkn2d // Cdkn2d // Cdkn2d // Cdkn2d // Cdkn2d	0.620491	0.813611	-0.626271	0.250178	3.66966	1.24676	7	0	0	0	2.02832	0.92213	-0.435903	-0.543901	-1.30532	1.73437	-1.15013	0.592657	0.727411	0.288214	-0.127005	0.940271	0.897847	-0.977698	-0.560393	-1.47321	0.321153	-0.444162	-0.911532	-0.523119
44888	TC1100002549.mm.1	Hmmr // Hmmr // Hmmr // Hmmr // Hmmr // Hmmr // Hmmr // Hmmr // Hmmr // Hmmr // Hmmr // Hmmr // Hmmr // Hmmr // Hmmr // Hmmr // Hmmr	0.438213	0.893061	-0.809444	0.485153	2.84445	1.24766	7	0	0	0	-0.261581	1.05959	-0.665319	-1.14735	-1.31535	1.17394	-0.319827	0.314929	-0.0653521	0.331088	1.97481	0.694246	2.14313	-0.680212	-0.080175	-0.854345	0.126108	-0.981199	-0.261779	-1.18536
31552	TC0800002945.mm.1	Rfwd3 // Rfwd3 // Rfwd3 // Rfwd3 // Rfwd3 // Rfwd3 // Rfwd3 // Rfwd3 // Rfwd3	0.289954	0.733251	-0.958809	0.188192	4.19498	1.24876	7	0	0	0	-0.230212	0.100573	0.214064	-0.777738	-0.905936	-0.090134	0.396608	-0.219308	-0.283021	-0.37088	1.06499	1.53416	3.1724	-0.307389	-0.708318	0.233483	0.0530798	-1.16369	-0.793653	-0.919081
32180	TC0900000328.mm.1	4930581F22Rik // 4930581F22Rik // 4930581F22Rik	0.141261	0.724239	-1.11422	0.22429	4.14595	1.25548	7	0	0	0	0.827407	0.578775	0.370157	0.475599	0.810618	-1.35179	1.11246	0.338387	0.125613	0.494246	-1.36694	-0.0404305	1.12802	-1.75573	0.653291	-0.668484	1.61144	-0.90658	-1.08398	-1.35209
49097	TC1200002500.mm.1	Gm6750	0.4739	1.15253	-0.781778	0.27284	2.71074	1.25568	7	0	0	0	0.456063	2.83112	-0.178799	-0.761807	-1.51788	-0.787737	0.269573	0.0932997	-0.0453133	-0.311639	-0.433864	0.999735	1.75024	-0.117926	0.593609	-0.657758	0.164413	-0.494279	-0.813947	-1.03711
2700	TC0100002734.mm.1	Gpr55 // Gpr55 // Gpr55 // Gpr55 // Gpr55 // Gpr55	0.702275	1.0298	-0.553625	0.0565489	3.21535	1.2559	6	0	0	0	2.13342	0.592618	1.64839	-0.731823	-1.36507	-0.462438	-1.23765	0.333036	0.678959	0.963651	-0.866429	-0.234689	0.425623	-0.471577	-0.20143	-1.08622	1.5425	-0.557394	-0.495286	-0.608196
35589	TC0X00000392.mm.1	---	0.535493	1.10279	-0.720564	0.379032	2.6681	1.25606	7	0	0	0	2.19179	0.102752	1.77467	-0.492809	0.229311	-1.09806	-0.857539	1.8218	0.363175	0.3201	-1.05055	0.0465252	0.219565	-0.474201	-1.30705	-0.16366	0.535881	-0.294041	-0.848833	-1.01882
24557	TC0700000549.mm.1	---	0.557432	0.457176	-0.704174	0.274223	5.38319	1.26161	6	0	0	0	0.529669	0.271761	0.658709	-0.642852	-0.518824	0.276909	0.189798	1.09461	1.21597	0.0203775	1.06925	0.136287	1.27551	-1.90551	-1.10057	-1.86715	1.40859	-0.839276	-0.884632	-0.388613
9488	TC0300000178.mm.1	---	0.363744	0.673408	-0.898296	0.123356	4.77502	1.26204	6	0	0	0	1.40293	-0.584764	-0.335732	0.892396	-0.238222	-0.35465	-1.03287	2.79673	0.450387	0.85608	0.407675	0.349636	-0.301388	-0.670835	-1.24162	-0.523907	0.823039	-0.822419	-1.04063	-0.831836
27349	TC0700003365.mm.1	Ube2nl	0.635654	0.909905	-0.627681	0.196796	3.488	1.26334	7	0	0	0	0.0998809	0.518204	0.467369	-1.25261	-0.333621	0.101906	-0.531822	-1.83236	-0.487566	1.88363	0.0961704	1.87189	1.35552	1.27619	-0.331273	0.000197	-1.01866	-0.417702	-0.657435	-0.807906
28137	TC0700004162.mm.1	---	0.880156	0.993699	-0.383182	0.360683	2.94176	1.26334	7	0	0	0	1.79119	0.385431	2.44293	-0.935183	-0.3726	-1.1636	-0.41911	-0.674406	1.1325	0.693893	0.187664	-0.472517	-0.911824	-0.492793	-0.651553	-0.760507	1.37003	-0.782439	-0.286207	-0.0809007
3333	TC0100003375.mm.1	Gm25488	0.542871	1.09883	-0.723469	0.225917	2.909	1.26634	7	0	0	0	1.69396	0.370745	1.70478	-0.10935	0.0214648	-0.668871	0.637434	-0.739786	1.55029	-0.592245	-0.787787	-0.139652	-0.847837	-0.229536	0.685342	-1.81622	1.43767	-0.974453	-0.536383	-0.65957
34287	TC0900002451.mm.1	Kif23 // Kif23 // Kif23 // Kif23 // Kif23 // Kif23 // Kif23 // Kif23 // Kif23	0.499605	0.870248	-0.769769	0.116109	3.78145	1.26937	6	0	0	0	0.551879	0.474874	-0.083521	-1.2248	-1.21647	-0.315429	-0.0507919	0.212177	-0.348716	-0.222574	0.971331	2.15396	2.58841	-0.806637	0.362923	-0.261187	-0.47611	-0.8942	-0.750784	-0.664322
41537	TC1000002401.mm.1	Ybey // Ybey // Ybey // Ybey // Ybey	0.670969	0.69433	-0.599873	0.222111	4.3509	1.27084	7	0	0	0	0.143228	0.957838	-0.328129	0.946664	0.135602	0.390506	1.68747	-1.80255	1.39118	1.56456	0.754676	0.213432	-1.01046	-1.11682	-0.601411	-1.40319	-0.122983	-0.344243	-0.745668	-0.709708
41572	TC1000002436.mm.1	Lrrc3 // Lrrc3 // Lrrc3 // Lrrc3 // Lrrc3 // Lrrc3	0.119519	0.835676	-1.15504	0.273345	3.60975	1.27456	7	0	0	0	1.19158	-0.251666	0.0630034	1.41586	-0.0986383	-0.153142	0.926044	1.28317	-0.285555	-0.032758	-1.08777	1.2398	-0.628829	-0.189933	-1.86654	1.30036	0.640126	-1.42577	-1.16018	-0.879155
29260	TC0800000629.mm.1	Hmgb2 // Hmgb2 // Hmgb2 // Hmgb2 // Hmgb2 // Hmgb2 // Hmgb2	0.420297	0.791325	-0.855403	0.255482	3.82534	1.2757	7	0	0	0	-0.0933369	0.630143	0.204575	-1.44229	-1.45187	-0.763844	-0.534374	0.584527	-0.255766	-0.363976	0.979668	1.84077	2.44493	0.436603	0.329592	-0.0375284	0.0583859	-1.12398	-0.826805	-0.615423
7382	TC0200003570.mm.1	---	0.359135	0.606104	-0.922696	0.517892	3.40301	1.28183	4	0	0	0	1.31688	0.067119	0.284888	-0.874731	-1.2728	1.02257	1.65877	-2.09962	0.841606	0.244724	-0.615548	0.374271	-0.228493	1.14885	-0.314223	0.560938	0.65288	-1.00569	-1.39408	-0.368318
26484	TC0700002489.mm.1	Clasrp // Clasrp // Clasrp // Clasrp	0.589853	0.904151	-0.69417	0.0748077	3.72769	1.28402	6	0	0	0	0.435785	1.02068	-0.144121	-0.915458	-1.60892	-1.88249	0.596761	0.587813	-0.446807	-0.0947063	1.33208	2.02606	1.00042	-0.126597	1.01049	-0.00657849	-0.701896	-0.682904	-0.773972	-0.625634
50650	TC1300001407.mm.1	Gm10357	0.456182	1.19933	-0.828819	0.262276	2.68871	1.285	7	0	0	0	0.468347	2.8373	-0.738216	-0.788277	-1.2322	-0.862584	0.461026	0.583732	0.429125	-0.225708	-0.477303	0.899729	1.71337	-0.176326	-0.349253	-0.334155	0.277846	-0.747281	-0.616996	-1.12218
35780	TC0X00000584.mm.1	Gm26111	0.511713	1.17431	-0.775779	0.65541	2.20742	1.28749	6	0	0	0	0.3951	0.878996	-0.0349775	-0.435437	0.287863	0.153157	-0.179061	-1.08361	-0.194212	2.9607	-0.588499	0.164887	-0.026503	-0.116131	0.954156	-1.72256	0.913471	-1.47219	-0.171019	-0.684126
41715	TC1000002579.mm.1	Gm23122	0.689213	1.32675	-0.598775	0.402263	2.33064	1.28799	7	0	0	0	0.732358	0.580838	0.442518	-0.243538	-0.716542	-0.80489	0.0849297	-1.36189	-0.650627	3.51183	0.243902	-0.0363309	0.0910384	-0.696481	0.250985	0.245015	0.123209	-0.806586	-0.13511	-0.854629
60587	TC1700001284.mm.1	Six3os1_7	0.789289	1.06147	-0.498749	0.273513	2.98739	1.28804	7	0	0	0	1.41886	1.42556	-0.365156	-0.861496	-0.756706	-0.0313066	-1.76709	-0.958644	0.42097	2.59957	-0.0472669	0.0724843	-0.840579	-0.0208194	-0.0513106	0.381432	0.877744	-0.81451	-0.335296	-0.346441
62845	TC1800000744.mm.1	---	0.834452	0.777921	-0.454274	0.369143	3.5488	1.28873	7	0	0	0	1.44467	-0.226069	1.85876	-0.00259156	0.167638	1.2371	-2.10233	-0.805936	1.38832	0.604672	0.786546	-0.0157374	-1.05618	-0.05888	-1.26713	-0.490861	-0.0991759	-0.163716	-0.329462	-0.869643
44106	TC1100001759.mm.1	---	0.716383	0.957203	-0.572769	0.150863	3.46429	1.28915	6	0	0	0	0.5448	1.26069	-0.817039	-0.0742433	-0.370061	-0.144267	-1.80541	1.56954	-0.0833263	0.773171	2.09579	1.2406	-1.60884	-0.588326	-0.240754	-0.0412912	0.00728191	-0.401881	-0.687497	-0.62893
16219	TC0400003721.mm.1	Hmgn2 // Hmgn2 // Hmgn2 // Hmgn2 // Hmgn2 // Hmgn2 // Hmgn2 // Hmgn2 // Hmgn2 // Hmgn2 // Hmgn2 // Hmgn2 // Hmgn2 // Hmgn2 // Hmgn2 // Hmgn2 // Hmgn2 // Hmgn2 // Hmgn2 // Hmgn2 // Hmgn2 // Hmgn2 // Hmgn2 // Hmgn2 // Hmgn2 // Hmgn2 // Hmgn2 // Hmgn2 // Hmgn2 // Hmgn2 // Hmgn2 // Hmgn2 // Hmgn2 // Hmgn2 // Hmgn2 // Hmgn2	0.22316	1.00292	-1.06951	0.301089	3.09972	1.29267	7	0	0	0	-1.19349	1.48178	-0.277041	-0.486202	-0.971656	0.468883	-0.220333	0.131192	-0.122472	-0.432077	0.686102	1.41932	2.49619	0.599523	-0.0270846	-0.838009	0.493896	-0.722261	-1.22831	-1.25796
17067	TC0500000347.mm.1	Depdc5 // Depdc5 // Depdc5 // Depdc5 // Depdc5 // Depdc5 // Depdc5 // Depdc5 // Depdc5 // Depdc5 // Depdc5 // Depdc5 // Depdc5 // Depdc5 // Depdc5 // Depdc5 // Depdc5 // Depdc5 // Depdc5 // Depdc5 // Depdc5 // Depdc5 // Depdc5 // Depdc5 // Depdc5 // Depdc5 // Depdc5 // Depdc5 // Depdc5 // Depdc5 // Depdc5 // Depdc5 // Depdc5 // Depdc5 // Depdc5 // Depdc5 // Depdc5 // Depdc5 // Depdc5 // Depdc5 //…	0.468643	1.09003	-0.826011	0.09406	3.11548	1.29465	6	0	0	0	0.296317	2.27853	1.12932	-1.08664	-0.842402	0.191629	-0.786286	1.52273	-0.709096	-0.614841	-0.192268	1.09253	1.41723	0.142057	-0.434636	-1.07889	0.152738	-0.914434	-0.72718	-0.836419
6174	TC0200002351.mm.1	---	0.546465	1.00065	-0.751027	0.610088	2.51048	1.29749	6	0	0	0	1.13292	1.64083	-0.0948725	0.270136	-0.201202	-0.925092	-1.50303	1.05461	-0.104442	1.87878	-0.747254	0.119291	-1.4371	0.113812	0.50051	-0.62847	1.18366	-0.109746	-1.32421	-0.819126
33036	TC0900001190.mm.1	---	0.353353	0.846812	-0.944457	0.131294	3.94569	1.29781	6	0	0	0	1.46406	1.06174	-0.68469	-0.502804	-0.507387	-0.715638	1.56736	-1.53025	-0.111786	1.05894	-0.513476	0.198682	0.263119	-0.445885	1.57906	-0.750424	1.40275	-0.807587	-1.06936	-0.956429
19792	TC0500003098.mm.1	4930401G09Rik // RP24-132L16.5	0.536212	1.03208	-0.76434	0.213942	3.17844	1.30055	7	0	0	0	0.445139	-0.289081	0.907649	-0.966556	-0.829029	-1.05662	0.0414372	-1.70152	-0.331633	2.66641	0.0892147	0.265789	0.942266	0.927121	0.379421	-0.270539	1.07356	-0.518828	-0.863348	-0.910844
10882	TC0300001587.mm.1	Depdc1a // Depdc1a // Depdc1a // Depdc1a // Depdc1a // Depdc1a // Depdc1a // Depdc1a // Depdc1a // Depdc1a // Depdc1a // Depdc1a // Depdc1a // Depdc1a // Depdc1a // Depdc1a	0.662603	0.956541	-0.643825	0.201882	3.43921	1.30643	7	0	0	0	-0.107514	0.506853	-0.102939	-1.39314	-1.43724	-0.541726	-0.666145	0.593756	0.143816	0.218564	2.37549	1.60395	1.82668	-0.311941	-0.00972809	-0.00476962	-0.762497	-0.615901	-0.457358	-0.858216
18289	TC0500001576.mm.1	Tbl2 // Tbl2 // Tbl2 // Tbl2 // Tbl2 // Tbl2 // Tbl2 // Tbl2 // Tbl2 // Tbl2 // Tbl2 // Tbl2 // Tbl2 // Tbl2	0.610415	1.22003	-0.69632	0.534608	2.35493	1.30673	7	0	0	0	-0.54668	1.00157	-0.18219	-0.877067	-1.05281	-0.664913	-0.237737	-0.0772803	0.332658	-0.106259	3.10368	0.670119	1.26867	-0.518188	-0.452239	0.876572	-0.448953	-0.161822	-0.696099	-1.23104
28	TC0100000030.mm.1	Gm9826	0.389529	0.629418	-0.917767	0.207578	4.90764	1.3073	7	0	0	0	0.41757	0.543991	0.799125	-1.5603	-0.878952	0.317399	-0.613084	-1.0288	0.108895	0.148683	-0.657049	1.36549	2.48716	1.41584	0.0385273	-0.108688	-0.0425064	-0.679647	-1.06055	-1.01311
6551	TC0200002733.mm.1	---	0.606338	1.09044	-0.701865	0.358455	2.83659	1.3082	7	0	0	0	2.85035	0.133626	0.277769	-0.892223	-0.0793405	-0.0144604	-0.244767	0.34651	1.18613	0.117291	-0.25052	-0.0702769	-0.931061	-0.481667	1.19783	-1.84281	0.80321	-0.883065	-0.288984	-0.933546
26168	TC0700002173.mm.1	Ube2s // Ube2s // Ube2s // Ube2s // Ube2s // Ube2s // Ube2s	0.448568	0.905564	-0.863187	0.372761	3.24443	1.31176	7	0	0	0	0.133888	0.20894	-0.424983	-0.977693	-1.52825	-0.433452	0.168489	0.137953	0.2193	-0.408604	1.54358	1.86786	2.4922	-0.342521	-0.101033	0.399155	-0.365266	-0.514899	-1.25636	-0.818304
11048	TC0300001757.mm.1	Ect2 // Ect2 // Ect2 // Ect2 // Ect2 // Ect2 // Ect2 // Ect2 // Ect2 // Ect2 // Ect2 // Ect2 // Ect2 // Ect2 // Ect2 // Ect2 // Ect2 // Ect2 // Ect2 // Ect2 // Ect2 // Ect2 // Ect2 // Ect2 // Ect2 // Ect2 // Ect2 // Ect2 // Ect2 // Ect2 // Ect2 // Ect2 // Ect2 // Ect2 // Ect2 // Ect2 // Ect2 // Ect2	0.389094	0.76058	-0.925005	0.635054	2.82051	1.3141	4	0	0	0	-0.1006	0.928629	-0.488143	-1.51293	-1.17579	-0.456675	-0.270491	1.32086	0.216589	-0.249317	1.65045	0.766045	2.23629	-0.36138	-0.0817551	-0.137533	0.490761	-1.31166	-0.192079	-1.27128
46854	TC1200000225.mm.1	Cmpk2 // Cmpk2 // Cmpk2 // Cmpk2 // Cmpk2 // Cmpk2	0.529109	1.10264	-0.785622	0.122004	3.11055	1.31473	6	0	0	0	-0.169643	-0.157355	0.864673	-0.272726	-0.76378	-1.90345	0.440116	-0.24371	0.487647	-0.220984	2.85744	0.0419853	0.293076	-0.718478	0.169827	0.00934677	1.64289	-0.854459	-0.644757	-0.857652
14941	TC0400002434.mm.1	Ddx58 // Ddx58 // Ddx58 // Ddx58 // Ddx58 // Ddx58 // Ddx58 // Ddx58 // Ddx58 // Ddx58 // Ddx58 // Ddx58 // Ddx58 // Ddx58 // Ddx58 // Ddx58 // Ddx58 // Ddx58 // Ddx58 // Ddx58 // Ddx58 // Ddx58 // Ddx58 // Ddx58 // Ddx58 // Ddx58 // Ddx58 // Ddx58	0.607983	1.35107	-0.70964	0.37817	2.37249	1.31762	7	0	0	0	-0.579331	0.0652313	0.163558	-0.441145	-0.173961	-0.43098	-0.0398019	-0.253102	-0.0495772	0.116173	3.46412	1.07571	0.51593	-1.27419	0.545329	-0.933521	0.358482	-0.353291	-1.10639	-0.669242
13274	TC0400000754.mm.1	---	0.584965	1.077	-0.735008	0.0743897	3.22473	1.31997	6	0	0	0	2.84715	0.0764282	0.543498	-0.591801	-1.23153	-1.29034	-0.327843	0.487986	0.760225	-0.494993	0.00977035	0.352678	-0.853383	-0.274837	-0.313082	1.03316	1.47193	-0.807924	-0.659227	-0.737874
59931	TC1700000621.mm.1	Tap1 // Tap1 // Tap1 // Tap1 // Tap1 // Tap1 // Tap1 // Tap1 // Tap1 // Tap1 // Tap1 // Tap1 // Tap1 // Tap1 // Tap1 // Tap1 // Tap1 // Tap1 // Tap1 // Tap1 // Tap1 // Tap1 // Tap1 // Tap1 // Tap1	0.379955	0.957813	-0.940567	0.0919901	3.60903	1.32052	6	0	0	0	-0.724767	-0.0424109	0.0841933	-0.903734	-0.857189	-0.235287	-0.984881	0.0738351	0.157995	0.378305	2.3714	0.43497	2.05259	0.161661	-0.334488	-0.447638	1.63715	-0.938494	-0.849631	-1.03358
12614	TC0400000091.mm.1	Rad54b // Fsbp // Rad54b // Rad54b // Rad54b // Rad54b // Rad54b // Rad54b // Rad54b // Rad54b // Rad54b // Fsbp // Rad54b // Rad54b // Fsbp // Rad54b // Rad54b // Rad54b // Rad54b // Rad54b // Rad54b // Rad54b // Fsbp // Rad54b // Rad54b // Rad54b // Fsbp	0.518818	0.689342	-0.806438	0.298207	4.24363	1.32526	7	0	0	0	0.0346882	0.820234	0.0250401	-1.36238	-1.29933	-0.470563	-0.363086	-0.181105	-0.320671	0.538229	0.789021	1.74519	2.68636	-0.747119	0.561558	0.221021	-0.257764	-1.02714	-0.467188	-0.924984
64928	TC1900001089.mm.1	Incenp // Incenp // Incenp // Incenp // Incenp // Incenp	0.239588	1.00037	-1.08677	0.396811	3.00014	1.32636	7	0	0	0	-0.022871	1.48753	-0.434013	-1.49989	-1.14302	0.305492	1.16163	-0.187763	-0.779846	-0.865466	1.04259	1.24919	1.77056	0.036484	0.250728	0.212904	0.676053	-1.34779	-0.630127	-1.28239
35760	TC0X00000564.mm.1	Gm14665	0.70249	0.965306	-0.62486	0.335	3.21434	1.32735	7	0	0	0	1.45995	0.353836	1.77089	-0.244304	-0.588554	-0.972743	1.10867	-1.57988	1.72202	0.108439	-0.774065	0.276372	-0.895399	1.21775	-0.260933	-1.04075	0.213285	-0.418223	-0.44498	-1.01138
22012	TC0600001598.mm.1	---	0.510599	1.06548	-0.818337	0.243738	3.11524	1.32894	7	0	0	0	0.0213881	0.374204	-0.457619	-1.46681	-0.987719	-0.188122	0.449542	0.384089	-0.205888	-0.16792	2.3015	1.70852	2.02757	-0.679048	-0.271987	-0.156821	-0.229871	-1.00043	-0.541442	-0.913138
53584	TC1400001603.mm.1	Anxa11os // RP24-530J21.3	0.679403	0.918958	-0.650327	0.519275	2.8981	1.32973	6	0	0	0	2.49411	0.226961	1.02969	-0.250324	-1.08167	-1.05177	1.81859	0.345765	-0.0802931	0.930306	-0.124617	0.279664	-0.503537	0.0240681	-1.38307	-0.953017	0.230129	-0.700448	-0.107809	-1.14272
9249	TC0200005454.mm.1	Rgs19 // Rgs19 // Rgs19 // Rgs19 // Rgs19 // Rgs19 // Rgs19 // Rgs19 // Rgs19 // Rgs19 // Rgs19 // Rgs19 // Rgs19 // Rgs19 // Rgs19 // Rgs19 // Rgs19 // Rgs19 // Rgs19 // Rgs19 // Rgs19 // Rgs19 // Rgs19 // Rgs19 // Rgs19 // Rgs19	0.289426	1.00396	-1.04148	0.200358	3.35493	1.33091	6	0	0	0	-0.391338	2.191	-0.820584	-1.23697	-0.893351	-1.06634	0.674881	0.711423	0.191158	-0.26121	0.931621	0.185341	0.920164	0.581787	-0.80276	0.696192	1.51344	-1.02723	-0.848631	-1.24859
8815	TC0200005015.mm.1	Rbl1 // Rbl1 // Rbl1 // Rbl1 // Rbl1 // Rbl1 // Rbl1 // Rbl1 // Rbl1 // Rbl1 // Rbl1 // Rbl1 // Rbl1 // Rbl1 // Rbl1 // Rbl1	0.318581	0.790788	-1.01289	0.218952	4.10286	1.33147	7	0	0	0	0.265367	0.863177	-0.316452	-0.721494	-0.760102	-0.323869	0.230622	-0.128374	-0.260515	0.0309284	-0.205987	1.85355	3.09822	-0.675302	-0.116337	0.127765	0.0774812	-1.24362	-0.808015	-0.987038
45601	TC1100003265.mm.1	Ankrd13b // Ankrd13b // Ankrd13b // Ankrd13b // Ankrd13b // Ankrd13b // Ankrd13b // Ankrd13b // Ankrd13b // Ankrd13b // Ankrd13b // Ankrd13b // Ankrd13b // Ankrd13b // Ankrd13b // Ankrd13b // Ankrd13b // Ankrd13b // Ankrd13b	0.473998	0.790262	-0.857748	0.729128	2.58008	1.33175	4	0	0	0	0.495648	1.93571	-0.378179	-0.512918	-0.502317	0.278417	0.36906	1.23958	-0.171598	1.03467	0.242612	0.159126	-1.76377	1.3055	-0.432823	-1.56239	0.836925	-0.0173657	-1.32205	-1.23383
35952	TC0X00000756.mm.1	Gm14711	0.687795	0.622331	-0.646322	0.318063	4.47073	1.33412	7	0	0	0	1.39774	0.458269	1.31154	-0.843392	-0.617725	2.10639	-0.918162	-0.523623	-0.424045	0.996916	0.516568	0.55758	-0.909347	0.163839	-0.934919	-1.51367	1.11502	-0.426831	-1.01108	-0.501054
52504	TC1400000501.mm.1	Cdkn3 // Cdkn3 // Cdkn3 // Cdkn3 // Cdkn3 // Cdkn3	0.469121	0.783036	-0.865895	0.231524	4.11095	1.33502	7	0	0	0	-0.187105	0.331222	0.365321	-1.34428	-0.977006	0.911131	-0.179795	0.120618	-0.426076	0.134029	1.6749	1.39156	2.49743	-0.540585	0.00652669	-1.11904	-0.0611511	-1.00733	-0.598707	-0.991646
16471	TC0400003976.mm.1	Gm13237	0.336537	0.856646	-1.00206	0.0744323	4.09833	1.3386	6	0	0	0	0.0317397	0.714527	-0.470268	-1.59883	-1.13605	0.359031	-0.0226021	-0.24566	-0.450872	-0.24739	0.976732	1.80129	2.52709	0.270483	0.526633	0.0439361	-0.0736095	-0.979545	-0.941489	-1.08515
65227	TC1900001389.mm.1	---	0.268628	1.07925	-1.07282	0.453361	2.76773	1.34145	7	0	0	0	1.60481	-0.71385	0.892277	0.498666	1.34587	-1.13257	0.156534	-0.583818	-0.170837	1.60979	-0.885216	-0.456577	-0.460965	0.512124	-0.509547	-0.258272	1.77005	-1.05412	-0.629103	-1.53525
6843	TC0200003028.mm.1	---	0.754912	0.161389	-0.590775	0.239939	8.89037	1.34569	2	0	0	0	0.777683	0.669472	0.703502	1.10467	0.218336	0.165357	-1.12441	0.25233	0.923974	0.957986	0.479768	0.772003	-1.82891	-1.28281	0.434482	-2.28069	0.829577	-0.850801	-0.54359	-0.377933
44827	TC1100002488.mm.1	Ranbp17 // Ranbp17 // Ranbp17 // Ranbp17 // Ranbp17 // Ranbp17 // Ranbp17 // Ranbp17 // Ranbp17 // Ranbp17 // Ranbp17 // Ranbp17 // Ranbp17 // Ranbp17 // Ranbp17 // Ranbp17 // Ranbp17	0.547872	1.09784	-0.798437	0.784052	2.19241	1.34631	5	0	0	0	0.185169	-0.0330889	0.426265	-1.50162	-1.18777	-0.109809	-0.310655	0.0404998	-0.137245	-0.29831	2.89284	0.799471	1.55426	0.00882075	0.486821	-0.14535	-0.274993	-0.852294	0.011154	-1.55417
11937	TC0300002659.mm.1	Mov10 // Mov10 // Mov10 // Mov10 // Mov10 // Mov10 // Mov10 // Mov10 // Mov10 // Mov10 // Mov10 // Mov10 // Mov10 // Mov10 // Mov10 // Mov10 // Mov10 // Mov10 // Mov10 // Mov10 // Mov10 // Mov10 // Mov10 // Mov10	0.397447	1.04008	-0.950411	0.30567	3.12794	1.34786	7	0	0	0	-0.418492	0.311847	0.0549126	-0.538379	-1.10862	0.660544	-0.508556	0.401894	0.491816	-0.178027	2.65143	-0.131362	1.62448	-0.534942	-0.556374	-0.847175	1.47622	-1.02605	-0.614024	-1.21116
23347	TC0600002941.mm.1	Vgll4 // Vgll4 // Vgll4 // Vgll4 // Vgll4 // Vgll4 // Vgll4 // Vgll4 // Vgll4 // Vgll4 // Vgll4 // Vgll4 // Vgll4 // Vgll4 // Vgll4 // Vgll4 // Vgll4 // Vgll4 // Vgll4	0.456072	1.00342	-0.893597	0.311838	3.21487	1.34967	7	0	0	0	-0.187176	0.43868	-0.782131	-0.853754	0.733249	0.390284	0.0404186	-2.00919	0.371278	0.565266	2.46986	0.316733	0.856909	-0.808707	-0.48184	1.32104	0.299871	-0.739229	-0.689053	-1.25251
33040	TC0900001194.mm.1	---	0.417889	1.32199	-0.931881	0.353049	2.50124	1.34977	7	0	0	0	2.24912	0.311947	-0.489546	-0.288045	-0.454299	-0.916893	0.200706	0.581643	-0.772721	2.32633	-0.178253	-0.521655	-0.822776	0.0397613	-0.41632	0.671678	1.27497	-0.642759	-0.827546	-1.32534
49499	TC1300000249.mm.1	Hist1h2bg // Hist1h2bg // Hist1h2bg // Hist1h2bg // Hist1h2bg	0.356284	0.442837	-0.993726	0.257096	6.03455	1.35001	6	0	0	0	0.415431	0.807893	-0.299641	-1.6516	-1.06573	-0.421835	-0.228955	-0.561092	0.0442305	0.867674	0.0303916	0.62801	2.72356	0.592226	-0.14842	-0.0315407	1.28057	-1.18098	-1.0996	-0.700598
13542	TC0400001025.mm.1	---	0.548978	0.851388	-0.801676	0.154246	4.04521	1.35065	6	0	0	0	-0.47058	0.583148	-0.279666	1.24257	0.830798	-0.716045	-0.303342	-1.04596	1.91265	0.462815	0.264568	1.36991	-0.0805343	-1.88228	-1.1665	1.23249	0.450976	-0.643439	-0.951593	-0.809998
8352	TC0200004547.mm.1	Ncaph // Ncaph // Ncaph // Ncaph // Ncaph // Ncaph // Ncaph // Ncaph // Ncaph // Ncaph // Ncaph // Ncaph // Ncaph // Ncaph // Ncaph // Ncaph // Ncaph // Ncaph	0.513727	0.669257	-0.837249	0.0739177	5.26635	1.35098	6	0	0	0	0.296728	0.317947	-0.500592	-1.59324	-1.45803	-0.0739175	-0.330519	-0.0810472	0.151806	0.681391	1.10117	1.54764	2.74422	-0.115806	-0.0844495	0.0257016	-0.117257	-0.918927	-0.774953	-0.817869
39857	TC1000000706.mm.1	---	0.771509	1.12218	-0.581081	0.312002	2.93524	1.35259	7	0	0	0	0.956924	0.401879	2.99734	-0.896292	-0.463968	-0.766273	-0.704684	-1.03689	0.173695	0.90447	-0.654153	0.620406	-0.0434695	1.33704	0.0468247	-1.04583	-0.0837754	-0.222864	-0.726939	-0.79344
32985	TC0900001138.mm.1	---	0.487759	1.20556	-0.865971	0.253437	2.82867	1.35373	7	0	0	0	2.66341	0.858483	0.0649794	-0.929028	-0.153368	-1.45715	1.10493	-0.205066	0.27196	0.872994	-1.30938	-0.00812615	-0.101641	-0.340496	-0.506415	0.811834	0.960008	-0.656907	-0.793163	-1.14784
667	TC0100000670.mm.1	---	0.78597	1.11381	-0.568769	0.563259	2.5467	1.35474	7	0	0	0	2.12211	0.161703	1.05747	-0.346404	-0.422825	-0.515352	-0.233762	0.640301	0.0660209	2.40066	-0.543952	0.237773	-0.428667	0.234581	-1.15466	-1.73193	0.16324	-0.200972	-0.288118	-1.21722
25136	TC0700001131.mm.1	Ticrr // Ticrr // Ticrr // Ticrr // Ticrr // Ticrr // Ticrr	0.732225	0.578295	-0.624079	0.380986	4.37385	1.3563	5	0	0	0	0.696252	0.923701	0.433046	-1.31389	-1.77397	-0.00167315	-0.304718	0.186539	0.519858	-0.203274	1.12821	1.62778	1.90967	-0.722334	0.769122	-1.09164	-0.910443	-0.558588	-0.280084	-1.03357
13693	TC0400001177.mm.1	Dmrta2 // Dmrta2 // Dmrta2 // Dmrta2 // Dmrta2	0.519057	1.06036	-0.840906	0.155475	3.31126	1.35996	6	0	0	0	0.278467	0.174425	2.68694	0.401266	0.213983	0.639717	-0.341464	0.288482	0.561213	0.0429834	0.645257	-0.755887	-1.5526	-0.19978	0.172533	-1.8885	1.15568	-0.778268	-0.72652	-1.01793
39257	TC1000000102.mm.1	---	0.998903	0.665237	-0.361903	0.221447	4.82427	1.36081	7	0	0	0	0.696737	1.69441	1.03591	-0.969846	-0.345446	-1.0147	-0.297168	-1.20732	0.641452	2.09617	0.590513	0.237135	0.590239	-1.72631	0.0912059	-1.34103	0.313754	-0.265482	-0.205013	-0.615214
64533	TC1900000689.mm.1	Nfkb2 // Nfkb2 // Nfkb2 // Nfkb2 // Nfkb2 // Nfkb2 // Nfkb2 // Nfkb2 // Nfkb2 // Nfkb2 // Nfkb2 // Nfkb2 // Nfkb2 // Nfkb2 // Nfkb2 // Nfkb2	0.471778	0.778192	-0.889382	0.377572	3.71796	1.36116	7	0	0	0	1.62141	1.17624	0.48779	-1.0901	-1.92232	-0.789192	0.224677	0.742348	-0.577482	0.116524	0.728768	-0.250804	0.272042	0.681014	-1.15412	0.820339	1.58101	-0.460647	-1.17231	-1.03519
12228	TC0300002954.mm.1	---	0.608521	1.23809	-0.752861	0.344517	2.67739	1.36138	7	0	0	0	0.916138	0.292985	3.06766	-0.0152367	0.871324	0.289606	-0.476946	-1.31293	-0.127214	0.375377	-0.926797	0.661493	-1.00903	0.603015	-0.656254	-0.705205	0.410585	-0.46325	-1.13386	-0.661476
23510	TC0600003104.mm.1	---	0.311568	1.00469	-1.04999	0.400863	3.06169	1.36156	7	0	0	0	2.11956	0.345454	-0.978269	0.955185	-0.566985	0.900365	-0.125964	-1.04598	0.325992	0.945599	-0.290176	-0.287181	-0.819318	-0.840261	-0.149617	0.811618	1.84995	-0.658314	-1.03221	-1.45945
45108	TC1100002771.mm.1	---	0.195083	0.418946	-1.1668	0.394878	4.90629	1.36188	4	0	0	0	0.210389	0.164295	-0.605394	-0.655437	-0.936808	0.457194	-0.295136	-0.579048	0.584771	0.496967	0.540494	-0.0259438	1.79358	1.01397	1.65563	-1.62733	1.3082	-1.11219	-0.802069	-1.58614
19184	TC0500002483.mm.1	Rfc1 // Rfc1 // Rfc1 // Rfc1 // Rfc1 // Rfc1 // Rfc1 // Rfc1 // Rfc1 // Rfc1 // Rfc1 // Rfc1 // Rfc1 // Rfc1 // Rfc1 // Rfc1 // Rfc1 // Rfc1 // Rfc1 // Rfc1 // Rfc1 // Rfc1	0.445062	1.1789	-0.920018	0.526304	2.53107	1.36508	7	0	0	0	-0.469963	0.293785	-0.113459	-0.644034	-0.893111	0.262475	-0.740301	0.0389112	-0.556052	-0.147121	2.61792	1.49033	2.03043	-0.467471	0.0882202	0.00648143	-0.0369814	-0.411225	-1.46224	-0.886591
25459	TC0700001455.mm.1	Rrm1 // Rrm1 // Rrm1 // Rrm1 // Rrm1 // Rrm1	0.434893	0.855856	-0.930353	0.159421	4.05933	1.36525	6	0	0	0	-0.452566	0.204437	0.3357	-1.15927	-1.48678	-0.0437058	-0.781339	-0.078844	-0.373707	0.113084	1.73433	1.48298	2.31778	0.927865	-0.0513271	0.382653	-0.280222	-0.757356	-1.07134	-0.962359
12730	TC0400000207.mm.1	Mms22l // Mms22l // Mms22l // Mms22l // Mms22l // Mms22l // Mms22l // Mms22l // Mms22l // Mms22l // Mms22l // Mms22l // Mms22l // Mms22l // Mms22l // Mms22l // Mms22l // Mms22l // Mms22l // Mms22l // Mms22l // Mms22l // Mms22l // Mms22l // Mms22l // Mms22l // Mms22l // Mms22l // Mms22l	0.411218	0.957163	-0.955497	0.210361	3.58139	1.36672	7	0	0	0	-0.0358409	0.190038	-0.264622	-1.31908	-1.66061	-0.405018	0.32741	-0.279746	-0.453822	-0.046107	2.11795	1.37093	1.90003	0.507483	0.86986	-0.0745786	0.12221	-1.17126	-0.750989	-0.944242
62813	TC1800000712.mm.1	Cep192 // Cep192 // Cep192 // Cep192 // Cep192 // Cep192 // Cep192 // Cep192 // Cep192 // Cep192	0.374833	0.959983	-0.993352	0.0905495	3.73223	1.36818	6	0	0	0	-0.735418	0.959484	-0.752609	-1.03765	-1.38237	-0.000201	0.12702	0.580187	-0.0172657	0.285223	1.7911	1.09331	2.31414	0.397316	-0.545651	-0.469319	0.372756	-1.03337	-0.889687	-1.05699
13368	TC0400000849.mm.1	Cntln // Cntln // Cntln // Cntln // Cntln // Cntln // Cntln // Cntln // Cntln // Cntln // Cntln // Cntln // Cntln // Cntln // Cntln	0.486088	0.642999	-0.88396	0.396819	4.10201	1.37005	6	0	0	0	0.0490498	0.622051	0.418108	-0.233773	-0.503936	0.221574	0.0559791	0.440053	-0.148537	-0.110286	0.948423	1.62381	2.79009	-1.47495	-0.256996	-1.00794	-0.780839	-0.986527	-0.445927	-1.21943
37473	TC0X00002304.mm.1	Gm5637	0.496826	0.781606	-0.873454	0.205253	4.30498	1.37028	7	0	0	0	0.0277564	0.399095	-0.0439082	-0.879467	-2.01816	-1.05429	0.542444	-0.211022	-0.217237	0.23316	1.98099	1.09793	1.97605	0.665386	0.40813	-0.580176	0.293686	-0.763142	-1.11027	-0.746944
21320	TC0600000900.mm.1	Gcfc2 // Gcfc2 // Gcfc2 // Gcfc2 // Gcfc2 // Gcfc2 // Gcfc2 // Gcfc2 // Gcfc2 // Gcfc2 // Gcfc2 // Gcfc2 // Gcfc2 // Gcfc2 // Gcfc2 // Gcfc2 // Gcfc2	0.430298	0.669121	-0.941392	0.509437	3.53617	1.37169	5	0	0	0	0.444394	-0.315123	-0.187364	-0.622351	-1.06797	-0.554294	-0.0700736	0.264101	0.898609	1.06676	1.29225	-0.187445	0.609367	1.52455	0.695397	-2.25585	1.28921	-0.440382	-0.924938	-1.45886
57431	TC1600000275.mm.1	---	0.513399	0.754391	-0.866581	0.747816	2.66711	1.37998	3	0	0	0	1.86368	0.781943	0.487129	-0.182528	-0.310065	-0.275794	-1.42937	1.60333	0.434242	0.679226	-0.132718	-0.519715	-0.689735	-0.481548	-0.408309	-0.820548	2.00052	-0.730451	-0.196182	-1.67311
21858	TC0600001441.mm.1	Zfp384 // Zfp384 // Zfp384 // Zfp384 // Zfp384 // Zfp384 // Zfp384 // Zfp384 // Zfp384 // Zfp384 // Zfp384 // Zfp384 // Zfp384 // Zfp384 // Zfp384 // Zfp384 // Zfp384 // Zfp384 // Zfp384 // Zfp384 // Zfp384 // Zfp384 // Zfp384 // Zfp384 // Zfp384 // Zfp384 // Zfp384 // Zfp384 // Zfp384 // Zfp384 // Zfp384 // Zfp384 // Zfp384 // Zfp384 // Zfp384 // Zfp384 // Zfp384 // Zfp384 // Zfp384 // Zfp384 //…	0.228604	0.800101	-1.15148	0.426997	3.53719	1.38008	7	0	0	0	0.15682	0.975461	-0.512197	-0.219335	-1.79374	-0.501381	-0.843551	1.77709	-0.779048	-0.21299	1.41696	0.555221	0.224769	0.871087	0.518409	0.505185	1.31566	-1.18647	-0.708058	-1.5599
18574	TC0500001865.mm.1	Brca2 // Brca2 // Brca2 // Brca2 // Brca2 // Brca2 // Brca2 // Brca2 // Brca2 // Brca2	0.417942	0.8809	-0.96569	0.433003	3.3232	1.38363	7	0	0	0	-0.335297	0.144057	-0.205282	-1.11713	-1.22483	-0.627207	-0.271534	0.196846	-0.106304	0.0566109	1.73207	1.63974	2.30521	0.892911	-0.139899	0.509051	-0.551939	-0.981578	-0.524961	-1.39053
32109	TC0900000257.mm.1	---	0.736781	0.988848	-0.647567	0.233066	3.48496	1.38435	7	0	0	0	1.15196	-0.487782	-0.116829	-0.154558	-0.992068	0.271768	-1.12211	-1.78738	2.57343	0.876339	0.469457	0.690891	1.43909	-0.31484	-0.395664	0.134252	-0.293266	-0.565517	-0.466621	-0.910561
31182	TC0800002569.mm.1	Dcaf15 // Dcaf15 // Dcaf15 // Dcaf15 // Dcaf15 // Dcaf15	0.641501	0.466833	-0.743261	0.470832	4.2729	1.38476	3	0	0	0	-0.0243113	0.636048	0.184194	-0.814208	-1.50374	0.28187	-0.387426	-0.0522183	1.19794	0.55408	1.21659	0.725961	2.53053	-0.227005	-0.526261	-1.67618	0.113922	-0.549497	-0.400229	-1.28006
50277	TC1300001033.mm.1	Dhfr // Dhfr // Dhfr // Dhfr // Dhfr	0.447233	1.03977	-0.939668	0.114502	3.48016	1.3869	6	0	0	0	-0.489175	0.312905	-0.0406839	-1.17794	-1.21469	-0.58466	-0.703613	0.531385	-0.128657	-0.335049	2.18508	1.62621	1.75661	0.434346	-0.21622	1.04889	-0.185732	-0.884595	-0.863108	-1.0713
6976	TC0200003162.mm.1	Rabl6 // Rabl6 // Rabl6 // Rabl6 // Rabl6 // Rabl6 // Rabl6 // Rabl6 // Rabl6 // Rabl6 // Rabl6 // Rabl6 // Rabl6 // Rabl6 // Rabl6 // Rabl6 // Rabl6 // Rabl6 // Rabl6 // Rabl6 // Rabl6 // Rabl6 // Rabl6 // Rabl6 // Rabl6	0.252191	1.01722	-1.13573	0.349049	3.19733	1.38792	7	0	0	0	-0.701915	1.46506	-0.386949	-0.0816096	-0.751765	0.613147	0.255434	0.0211962	-0.948426	0.00654975	0.813066	1.51794	2.31861	0.297983	-1.27722	0.339072	-0.092998	-0.878883	-0.995152	-1.53314
22611	TC0600002200.mm.1	Ezh2 // Ezh2 // Ezh2 // Ezh2 // Ezh2 // Ezh2 // Ezh2 // Ezh2 // Ezh2 // Ezh2 // Ezh2 // Ezh2 // Ezh2 // Ezh2 // Ezh2 // Ezh2 // Ezh2 // Ezh2 // Ezh2 // Ezh2 // Ezh2 // Ezh2 // Ezh2 // Ezh2 // Ezh2 // Ezh2 // Ezh2 // Ezh2 // Ezh2 // Ezh2 // Ezh2 // Ezh2 // Ezh2 // Ezh2	0.639855	0.936202	-0.75454	0.221991	3.70507	1.39439	7	0	0	0	0.242164	0.885407	-0.237495	-0.964911	-1.09663	-0.158633	-0.33203	0.120957	-0.0157664	-0.176271	1.73775	2.0432	2.10747	-1.47007	-0.236773	0.141444	-0.326197	-0.872995	-0.892178	-0.498446
51233	TC1300001991.mm.1	Hist1h2al // Hist1h2al	0.606636	1.19235	-0.789075	0.255622	2.94319	1.39571	7	0	0	0	-0.344305	-0.189101	0.161165	-0.600812	-0.88095	-0.962048	-0.123348	-0.327095	0.144231	-0.100492	2.75117	1.82378	0.634129	0.21825	-0.896043	1.50332	-0.444625	-0.804218	-1.03679	-0.526218
25956	TC0700001957.mm.1	Foxi2 // Foxi2 // Foxi2 // Foxi2 // Foxi2 // Foxi2	0.534807	0.9964	-0.862213	0.519118	2.90255	1.39702	7	0	0	0	1.61057	-0.102016	1.54058	0.215608	0.176882	-1.35337	1.52756	0.0314287	-0.174635	1.62347	-0.500918	-0.253399	-0.180312	-0.3799	-1.34832	-0.928636	1.08204	-0.531667	-0.594431	-1.46054
28445	TC0700004476.mm.1	Gm27975	0.512127	0.87304	-0.888766	0.152197	4.10245	1.40089	6	0	0	0	0.367906	1.88339	-0.796583	-1.24515	-0.568007	0.578218	1.06165	0.700054	-0.213374	0.469436	0.749965	1.12415	-1.85684	0.776526	-0.903791	-0.548405	1.08714	-1.05998	-0.768843	-0.837472
43544	TC1100001192.mm.1	Gm11204	0.384224	0.845912	-1.01768	0.712048	2.69185	1.4019	4	0	0	0	-0.862801	1.38323	-0.189934	-0.771118	-0.780685	-0.303946	1.42408	0.878482	0.142795	-0.0601837	1.04384	1.23262	1.05106	1.40847	-1.21816	-0.607189	-0.717536	-0.389265	-0.872717	-1.79105
32709	TC0900000858.mm.1	Csnk1g1 // Csnk1g1 // Csnk1g1 // Csnk1g1 // Csnk1g1 // Csnk1g1 // Csnk1g1 // Csnk1g1 // Csnk1g1 // Csnk1g1 // Csnk1g1 // Csnk1g1 // Csnk1g1 // Csnk1g1 // Csnk1g1 // Csnk1g1 // Csnk1g1 // Csnk1g1 // Csnk1g1 // Csnk1g1 // Csnk1g1 // Csnk1g1 // Csnk1g1	0.614186	0.732323	-0.788162	0.10076	4.95811	1.40235	6	0	0	0	0.290966	0.662957	-0.554964	-0.658025	-1.06688	-1.17062	0.0223093	1.15806	0.310305	0.559608	1.40342	1.62701	-0.472573	2.03463	0.380736	-1.33466	-0.827797	-0.763023	-0.702351	-0.899112
5604	TC0200001776.mm.1	Nusap1 // Nusap1 // Nusap1 // Nusap1 // Nusap1 // Nusap1 // Nusap1 // Nusap1 // Nusap1 // Nusap1 // Nusap1 // Nusap1 // Nusap1 // Nusap1 // Nusap1 // Nusap1	0.470748	0.720745	-0.934091	0.115052	5.01017	1.40484	6	0	0	0	-0.0460288	0.457992	-0.00846442	-1.15469	-1.42853	-0.368661	-0.169872	0.351827	-0.134418	0.257547	0.865107	1.9035	2.77797	-0.0290953	0.148873	-0.525453	-0.0953381	-1.06087	-0.836309	-0.905098
2238	TC0100002262.mm.1	---	0.502764	1.08094	-0.902317	0.421601	2.95451	1.40508	7	0	0	0	0.193507	-0.187354	-0.804991	-0.534116	0.194812	1.83803	-0.141031	-1.06776	0.899995	0.219874	2.62056	0.577764	-0.745238	-0.582641	0.396084	-0.949582	0.779041	-0.514955	-1.35136	-0.840636
29402	TC0800000772.mm.1	A230052G05Rik	0.7494	0.78603	-0.655741	0.530777	3.29215	1.40514	5	0	0	0	0.90307	0.82107	-0.611893	-0.222005	-1.08928	-1.7391	-1.54318	0.722025	0.878998	2.063	0.729294	0.462265	-0.758329	0.206464	-0.192841	1.2996	0.0380619	-0.0552859	-0.849602	-1.06234
28592	TC0700004624.mm.1	Plk1 // Plk1 // Plk1 // Plk1 // Plk1	0.611289	1.2217	-0.795466	0.390753	2.73729	1.40675	7	0	0	0	-0.127569	-0.348728	-0.207615	-1.01124	-1.23794	-0.175016	-0.20047	-0.0796021	0.290908	0.178209	3.01385	1.47997	1.44601	0.0508942	0.247946	-0.50304	-0.430154	-0.355939	-0.926911	-1.10355
1833	TC0100001853.mm.1	Ints7 // Ints7 // Ints7 // Ints7 // Ints7 // Ints7 // Ints7 // Ints7	0.489527	0.717249	-0.918025	0.208922	4.74373	1.40755	7	0	0	0	-0.609611	0.916763	-0.135605	-1.20136	-1.00989	-0.935029	-0.124102	-0.90669	0.1157	0.654974	1.29222	1.19225	2.68446	0.0324161	0.385958	0.265496	0.136118	-0.730058	-1.14297	-0.88105
26996	TC0700003007.mm.1	Bax // Bax // Bax // Bax // Bax // Bax // Bax	0.469276	0.576056	-0.939159	0.22733	5.54004	1.40843	7	0	0	0	0.500046	-0.025787	0.75867	-1.66464	-0.334467	-1.84547	1.04769	0.389299	-0.138757	0.0640902	0.604218	1.52245	2.24761	-0.0607304	0.16942	-0.139647	-0.27652	-0.702376	-1.15568	-0.959423
31017	TC0800002404.mm.1	Pik3r2 // Pik3r2 // Pik3r2 // Pik3r2 // Pik3r2 // Pik3r2 // Pik3r2 // Pik3r2 // Pik3r2 // Pik3r2 // Pik3r2 // Pik3r2 // Pik3r2 // Pik3r2 // Pik3r2 // Pik3r2 // Pik3r2 // Pik3r2	0.416295	0.636613	-0.993132	0.298343	4.76293	1.40943	7	0	0	0	-0.167659	0.97593	-0.684128	-0.968756	-1.2861	-1.11707	-0.030053	-0.0578155	1.1217	0.484434	0.628092	0.555693	1.11755	2.50312	0.307031	-0.786019	0.383451	-0.715232	-0.955768	-1.3084
51575	TC1300002339.mm.1	Rfesd // Rfesd // Rfesd // Rfesd // Rfesd // Rfesd // Rfesd // Rfesd // Rfesd // Rfesd // Rfesd // Rfesd // Rfesd	0.597814	0.778035	-0.81357	0.0663834	4.75924	1.41138	6	0	0	0	1.47307	0.296072	0.592352	0.900138	0.661534	-1.5282	0.126378	1.57657	0.630402	0.323101	-0.715201	1.5849	-0.606375	-1.39964	0.174987	-1.55594	-0.0934463	-0.791701	-0.76088	-0.888128
30579	TC0800001963.mm.1	Gm8096 // Gm8096	0.85368	0.843878	-0.561468	0.171931	4.23639	1.41515	7	0	0	0	1.31816	0.274216	1.28361	-0.639165	-1.56314	-0.727076	-1.58181	0.0266781	0.00300081	2.28637	-0.0178217	0.82823	0.125795	0.882654	-1.17283	-0.322833	0.680369	-0.678104	-0.642281	-0.364019
43465	TC1100001113.mm.1	Gm12345	0.524993	1.18824	-0.891741	0.305754	2.93586	1.41673	7	0	0	0	-0.0302491	1.97413	2.08205	-0.791179	-0.937458	-0.299618	-0.656796	1.36267	-0.939088	0.0302689	-0.472559	1.0304	0.782465	0.818149	-0.561777	-0.738932	0.0227519	-0.63496	-0.810291	-1.22997
50990	TC1300001748.mm.1	Gm27516	0.598122	0.732996	-0.818876	0.268324	4.46415	1.417	7	0	0	0	0.770571	0.682941	0.900513	-0.0063656	-0.310113	-1.54124	-0.965799	2.42776	1.92093	-0.288694	-0.0777483	0.278344	-0.908195	-0.0512113	-0.336477	-0.681319	0.642737	-0.71418	-0.618682	-1.12376
21125	TC0600000703.mm.1	Gm20718	0.699206	0.953518	-0.719273	0.414928	3.27782	1.41848	7	0	0	0	1.26361	-0.0638062	1.5518	0.435912	-0.520907	-0.837684	0.251843	-1.57622	2.13096	-0.40192	0.00638335	0.407419	-1.27845	0.844606	0.998853	-1.08121	0.0266346	-0.458843	-0.501211	-1.19777
3091	TC0100003128.mm.1	Ipo9 // Ipo9 // Ipo9 // Ipo9 // Ipo9 // Ipo9 // Ipo9 // Ipo9 // Ipo9 // Ipo9 // Ipo9 // Ipo9 // Ipo9 // Ipo9 // Ipo9 // Ipo9 // Ipo9 // Ipo9 // Ipo9 // Ipo9 // Ipo9 // Ipo9 // Ipo9 // Ipo9 // Ipo9 // Ipo9 // Ipo9 // Ipo9 // Ipo9 // Ipo9 // Ipo9 // Ipo9 // Ipo9 // Ipo9 // Ipo9	0.419388	0.953246	-1.0017	0.35458	3.42935	1.42109	7	0	0	0	-0.395438	1.29984	-0.219235	-1.20081	-1.549	-0.44099	-0.430362	0.955459	0.135033	-0.698956	1.80839	1.00608	1.80178	0.750736	0.0930031	-0.177084	0.26666	-1.32932	-0.62523	-1.05056
47180	TC1200000556.mm.1	---	0.764283	0.957994	-0.6587	0.214551	3.71837	1.42298	7	0	0	0	1.21278	0.647677	0.13434	-1.41957	-0.634513	-0.872213	-1.40952	1.0306	0.26245	-0.300355	0.755425	2.63767	-0.729962	0.753551	0.619085	-0.508138	-0.203199	-0.877444	-0.448603	-0.650054
18926	TC0500002220.mm.1	Slbp // Slbp // Slbp // Slbp // Slbp // Slbp // Slbp // Slbp // Slbp // Slbp // Slbp // Slbp // Slbp // Slbp // Slbp // Slbp // Slbp // Slbp // Slbp // Slbp // Slbp // Slbp // Slbp // Slbp // Slbp // Slbp // Slbp // Slbp	0.385377	0.833277	-1.03818	0.2732	4.04146	1.42356	7	0	0	0	0.294351	0.297161	-0.274379	-0.855075	-1.24896	-0.565488	0.0366145	0.283433	-0.560186	-0.041451	1.18014	1.80201	2.59913	-0.760795	0.102719	0.283041	0.542281	-1.14351	-1.24304	-0.727997
13441	TC0400000922.mm.1	Gm12635	0.613269	0.933537	-0.810332	0.0831558	3.99781	1.4236	6	0	0	0	2.45469	0.232689	0.83559	-0.75496	0.338655	-0.965244	1.08781	1.07304	-0.00345218	0.81829	-0.476968	0.432042	-0.435927	-0.779008	-0.0632726	-1.9994	0.636418	-0.719795	-0.883298	-0.827903
58399	TC1600001254.mm.1	Mcm4 // Mcm4 // Mcm4 // Mcm4 // Mcm4	0.34764	0.878431	-1.07697	0.078844	4.25101	1.42461	6	0	0	0	-0.440817	0.625874	-0.293543	-0.946378	-1.34023	-0.625768	-0.0614975	0.548758	-0.0181494	-0.467877	1.51116	1.51683	2.50671	0.415269	0.384181	-0.177192	0.0935688	-1.1379	-0.987918	-1.10509
36972	TC0X00001793.mm.1	Suv39h1 // Suv39h1 // Suv39h1 // Suv39h1 // Suv39h1 // Suv39h1 // Suv39h1 // Suv39h1 // Suv39h1 // Suv39h1 // Suv39h1 // Suv39h1 // Suv39h1 // Suv39h1 // Suv39h1 // Suv39h1	0.459615	0.713794	-0.96601	0.746464	2.80386	1.42562	3	0	0	0	1.6466	1.18084	-0.404183	-1.25415	-1.23816	-1.10203	0.250216	-1.19173	0.0185669	0.119532	0.463835	0.192113	0.685097	-0.0185482	1.36173	1.21415	0.97414	-0.139845	-1.16626	-1.59193
53970	TC1400001994.mm.1	Tmem55b // Tmem55b // Tmem55b // Tmem55b // Tmem55b // Tmem55b // Tmem55b // Tmem55b // Tmem55b // Tmem55b // Tmem55b // Tmem55b // Tmem55b // Tmem55b // Tmem55b // Tmem55b // Tmem55b // Tmem55b // Tmem55b // Tmem55b // Tmem55b // Tmem55b // Tmem55b // Tmem55b // Tmem55b // Tmem55b // Tmem55b // Tmem55b // Tmem55b // Tmem55b	0.278432	0.680851	-1.15072	0.708872	2.95615	1.42915	3	0	0	0	0.07	1.5191	0.0318141	-0.666309	-0.636992	-0.593031	0.632821	-0.153315	-0.105404	0.911897	-0.402529	-0.0758518	1.07044	1.4544	-0.73919	-0.9531	2.0874	-0.596145	-0.906622	-1.94938
25142	TC0700001137.mm.1	5430400D12Rik	0.570289	1.07577	-0.859371	0.493785	2.87897	1.42966	7	0	0	0	-0.101392	0.415217	2.79324	-1.15499	1.42201	-0.646227	-0.427882	-0.0597354	-0.268815	0.047472	0.0292614	1.07704	-1.01288	0.664025	-1.03541	0.0818155	0.755363	-1.40038	-0.744771	-0.432962
61487	TC1700002201.mm.1	Gm16494	0.680716	1.06646	-0.750319	0.31667	3.23317	1.43103	7	0	0	0	0.971266	2.6252	-0.275499	-0.923588	-1.47167	-0.782404	-0.159455	0.247741	0.918975	-0.297134	-0.254451	1.07666	1.42908	-0.234383	0.0718247	-1.04696	0.355762	-0.800097	-0.411708	-1.03915
49373	TC1300000122.mm.1	---	0.747769	0.753346	-0.684542	0.56487	3.30835	1.43231	5	0	0	0	2.3348	0.844753	0.563236	-0.116176	0.830667	1.53829	-0.452763	-1.30189	0.675867	0.143851	0.0771236	0.594755	-1.10755	-1.56666	0.262821	-0.872029	-0.395462	-0.642463	-0.141888	-1.26927
41694	TC1000002558.mm.1	---	0.381055	0.724236	-1.0549	0.196697	4.84536	1.43596	7	0	0	0	0.457802	1.64647	0.948731	0.216662	0.527737	-0.615676	0.410426	-0.938493	-0.207988	-0.485227	0.061698	0.245893	-1.13808	-0.20586	2.18945	-1.30377	1.35493	-0.86926	-1.0344	-1.26105
64387	TC1900000543.mm.1	Cep55 // Cep55 // Cep55 // Cep55 // Cep55 // Cep55 // Cep55 // Cep55 // Cep55 // Cep55 // Cep55 // Cep55 // Cep55 // Cep55 // Cep55	0.438079	0.85613	-1.00011	0.0395637	4.43349	1.43819	6	0	0	0	-0.110056	0.650194	0.121072	-1.63621	-1.20013	0.156888	-0.166033	-0.495596	-0.0302712	-0.667895	1.43189	1.67162	2.35627	0.086979	0.395166	0.338179	0.0982656	-0.998642	-0.9613	-1.04039
13020	TC0400000498.mm.1	Tdrd7 // Tdrd7 // Tdrd7 // Tdrd7 // Tdrd7 // Tdrd7 // Tdrd7 // Tdrd7 // Tdrd7 // Tdrd7 // Tdrd7 // Tdrd7 // Tdrd7	0.305997	0.316878	-1.13425	0.58706	4.0065	1.44025	2	0	0	0	0.151825	0.626601	0.629346	-0.120563	-1.47331	1.38671	-1.30049	0.939902	0.263812	-0.208783	0.565782	0.113398	1.22275	0.439508	0.573992	-1.68871	1.28098	-0.513397	-1.68036	-1.209
41674	TC1000002538.mm.1	Hmg20b // Hmg20b // Hmg20b // Hmg20b // Hmg20b // Hmg20b // Hmg20b // Hmg20b // Hmg20b // Hmg20b // Hmg20b // Hmg20b // Hmg20b // Hmg20b // Hmg20b // Hmg20b // Hmg20b // Hmg20b // Hmg20b // Hmg20b // Hmg20b // Hmg20b // Hmg20b // Hmg20b // Hmg20b // Hmg20b // Hmg20b // Hmg20b // Hmg20b // Hmg20b // Hmg20b // Hmg20b // Hmg20b // Hmg20b // Hmg20b // Hmg20b // Hmg20b // Hmg20b	0.431682	1.01369	-1.0107	0.218653	3.57556	1.44238	7	0	0	0	2.42528	0.709089	-0.412245	-1.20062	-1.62738	0.31004	0.0927968	-0.235521	-0.650479	0.161238	0.116188	0.672708	0.361151	0.486856	1.66534	-0.616392	0.774052	-1.25613	-0.836681	-0.939293
52936	TC1400000950.mm.1	Gm5464 // Gm5464 // Gm5464 // Gm5464 // Gm5464 // Gm5464	0.540466	0.884002	-0.903116	0.205615	4.0712	1.44358	7	0	0	0	0.674367	1.11754	0.0784638	-1.58987	-0.552948	-0.477356	-0.660897	-0.186086	2.23322	-0.120168	-0.130935	-0.0692267	0.400793	0.907235	1.21338	-1.43123	1.30306	-0.831576	-0.742826	-1.13494
62395	TC1800000291.mm.1	Kif20a // Kif20a // Kif20a // Kif20a // Kif20a // Kif20a // Kif20a // Kif20a // Kif20a // Kif20a // Kif20a // Kif20a	0.618108	0.798411	-0.825985	0.661954	2.96555	1.44409	4	0	0	0	0.148715	1.36432	-0.300855	-1.39846	-1.23852	-0.00993368	1.00457	-0.0684249	0.45089	-0.240363	1.60587	1.29818	1.83719	-0.295019	0.0546741	-1.09539	-0.6395	-0.497088	-0.392894	-1.58797
50889	TC1300001646.mm.1	Hist1h3a // Hist1h3a // Hist1h3a // Hist1h3a // Hist1h3a	0.486744	1.12377	-0.963843	0.185826	3.3112	1.45059	6	0	0	0	-0.11347	1.56658	-0.411856	-1.13765	-0.592444	1.16288	-0.542942	-0.461879	-0.770262	-0.248105	1.3626	2.02172	1.48131	-0.86828	0.198675	0.561162	-0.316505	-0.783579	-1.15477	-0.95318
3880	TC0200000036.mm.1	Sephs1 // Sephs1 // Sephs1 // Sephs1 // Sephs1 // Sephs1 // Sephs1 // Sephs1 // Sephs1 // Sephs1 // Sephs1 // Sephs1 // Sephs1 // Sephs1	0.474075	1.24911	-0.977692	0.459618	2.6806	1.45177	7	0	0	0	-0.110003	0.880132	-0.590868	-0.937492	-0.857182	0.175236	-0.152581	-0.264396	-0.716561	-0.318309	2.57312	1.60102	0.465398	-0.0539381	0.945558	1.11669	-0.822741	-0.943453	-0.536151	-1.45347
48389	TC1200001776.mm.1	---	0.687191	1.18665	-0.765236	0.263793	3.06637	1.45243	7	0	0	0	2.33452	-0.033288	2.07363	-0.239868	-1.12993	0.0864943	-1.25316	0.567653	-0.410626	1.30118	-0.0893685	-0.365702	-0.354186	-0.232986	0.264311	-1.07086	0.847902	-1.04618	-0.522841	-0.726682
48446	TC1200001834.mm.1	Mis18bp1 // Mis18bp1 // Mis18bp1 // Mis18bp1 // Mis18bp1 // Mis18bp1 // Mis18bp1 // Mis18bp1 // Mis18bp1 // Mis18bp1 // Mis18bp1 // Mis18bp1 // Mis18bp1 // Mis18bp1 // Mis18bp1 // Mis18bp1 // Mis18bp1 // Mis18bp1 // Mis18bp1	0.688176	0.909476	-0.764812	0.508518	3.21413	1.45299	6	0	0	0	0.0571825	0.192096	0.580877	-1.31638	-1.43598	0.344793	-0.426495	0.211309	-0.170057	0.350041	2.40453	1.40256	1.79613	-0.0903488	-0.371725	-0.913508	-0.320599	-1.0452	-0.177821	-1.07141
31447	TC0800002838.mm.1	Cenpt // Cenpt // Cenpt // Cenpt // Cenpt // Cenpt // Cenpt	0.648229	0.869879	-0.806471	0.458924	3.44505	1.4547	7	0	0	0	0.335069	0.897467	-0.834953	-0.832959	-1.44221	1.26723	-1.05429	-0.149485	0.61055	0.504167	2.08862	0.936679	1.58432	-0.44521	-0.923139	0.118468	-0.240908	-0.36548	-0.772495	-1.28144
46649	TC1200000016.mm.1	Dnmt3a // Dnmt3a // Dnmt3a // Dnmt3a // Dnmt3a // Dnmt3a // Dnmt3a // Dnmt3a // Dnmt3a // Dnmt3a // Dnmt3a // Dnmt3a // Dnmt3a // Dnmt3a // Dnmt3a // Dnmt3a // Dnmt3a // Dnmt3a // Dnmt3a // Dnmt3a // Dnmt3a // Dnmt3a // Dnmt3a // Dnmt3a // Dnmt3a // Dnmt3a // Dnmt3a // Dnmt3a // Dnmt3a // Dnmt3a // Dnmt3a // Dnmt3a // Dnmt3a // Dnmt3a // Dnmt3a // Dnmt3a // Dnmt3a // Dnmt3a // Dnmt3a // Dnmt3a //…	0.480839	0.870755	-0.974685	0.248704	4.05355	1.45552	7	0	0	0	-0.59297	2.26604	0.194277	-0.139864	-0.705047	-1.06407	-0.110131	1.19674	0.247493	0.238306	0.585637	0.427087	0.930573	-0.446271	-0.245464	-1.60692	1.74864	-1.12435	-0.687594	-1.11211
45805	TC1100003470.mm.1	Prr11 // Prr11 // Prr11 // Prr11 // Prr11 // Prr11	0.50399	0.994409	-0.952076	0.335297	3.44407	1.45607	7	0	0	0	-0.493589	0.479502	0.0640342	-1.46565	-1.30686	0.215945	-0.263757	-0.175658	0.0495343	-0.0211765	2.52501	0.924621	1.95057	0.506415	0.041028	-0.449936	0.276199	-1.18056	-0.567149	-1.10852
35667	TC0X00000470.mm.1	Phf6 // Phf6 // Phf6 // Phf6 // Phf6 // Phf6 // Phf6 // Phf6 // Phf6 // Phf6 // Phf6 // Phf6 // Phf6 // Phf6 // Phf6	0.481949	0.842418	-0.974202	0.161242	4.38951	1.45615	6	0	0	0	-0.0169404	0.289819	0.336565	-0.533771	-0.266094	-0.160148	0.552147	0.4819	0.286393	-0.569213	0.958622	2.0884	2.55576	-0.823416	-0.284874	-1.16216	-0.810382	-0.796908	-1.01361	-1.11208
3395	TC0100003438.mm.1	Gm16550	0.50078	1.01163	-0.956736	0.103374	3.76629	1.45752	6	0	0	0	0.216898	1.8509	-0.322689	-0.828451	-1.46132	0.259104	-0.278496	-1.40413	-0.0102585	-0.579215	0.393117	1.9567	1.3363	0.247282	0.07986	1.22929	0.185318	-1.0037	-0.838218	-1.02829
46147	TC1100003814.mm.1	Etv4 // Etv4 // Etv4 // Etv4 // Etv4 // Etv4 // Etv4 // Etv4 // Etv4 // Etv4 // Etv4 // Etv4 // Etv4 // Etv4 // Etv4 // Etv4 // Etv4 // Etv4 // Etv4 // Etv4 // Etv4 // Etv4 // Etv4 // Etv4 // Etv4 // Etv4 // Etv4 // Etv4 // Etv4 // Etv4	0.714267	0.771788	-0.744869	0.182629	4.70416	1.45914	7	0	0	0	2.36381	0.788493	0.617377	-1.22408	-0.752659	-1.79237	0.484144	0.849442	0.0683646	0.170144	0.37468	0.616996	-1.73438	-0.0936663	0.575253	0.220203	0.702844	-0.780082	-0.907327	-0.547197
13978	TC0400001465.mm.1	Clspn // Clspn // Clspn // Clspn // Clspn // Clspn // Clspn // Clspn // Clspn // Clspn // Clspn // Clspn // Clspn // Clspn // Clspn // Clspn // Clspn // Clspn // Clspn // Clspn // Clspn	0.504381	0.808856	-0.956666	0.349907	3.98718	1.46105	7	0	0	0	0.700868	1.25689	0.267319	-1.95852	-0.789323	-0.392687	0.128707	1.41604	0.0421274	-0.99763	1.20312	1.05798	1.52588	-0.923259	-0.085877	-0.234004	0.652371	-1.07779	-0.56229	-1.22992
24172	TC0700000161.mm.1	Lig1 // Lig1 // Lig1 // Lig1 // Lig1 // Lig1 // Lig1 // Lig1 // Lig1 // Lig1 // Lig1 // Lig1 // Lig1 // Lig1 // Lig1 // Lig1 // Lig1 // Lig1 // Lig1 // Lig1 // Lig1 // Lig1 // Lig1 // Lig1 // Lig1 // Lig1 // Lig1 // Lig1 // Lig1 // Lig1 // Lig1 // Lig1 // Lig1 // Lig1	0.532905	0.929144	-0.930931	0.245029	3.86638	1.46384	7	0	0	0	0.216459	0.282844	-0.295419	-1.34028	-1.12026	-0.321008	-0.588416	0.717547	-0.0272961	-0.16732	1.88988	1.83119	2.21759	-0.392635	0.064589	-0.0350416	-0.139629	-1.16934	-0.679779	-0.943672
64373	TC1900000529.mm.1	Kif11 // Kif11 // Kif11 // Kif11 // Kif11	0.4406	0.716098	-1.02359	0.185693	5.02951	1.46419	7	0	0	0	0.303062	0.544725	-0.173021	-1.59621	-1.13601	-0.463253	0.305781	0.84674	0.351089	-0.597442	1.25593	1.39986	2.46556	-0.13241	0.0933718	-0.588763	0.191764	-1.08112	-0.815938	-1.1737
21909	TC0600001493.mm.1	---	0.60856	0.917133	-0.856428	0.374062	3.58701	1.46499	7	0	0	0	1.83492	1.25985	-0.642993	-0.529287	-0.863923	-1.17887	1.01077	1.1089	0.706369	0.965014	-0.576625	0.71338	-0.237653	-0.322646	-1.37709	-0.628076	1.32723	-0.466105	-1.21177	-0.891408
8944	TC0200005146.mm.1	Elmo2 // Elmo2 // Elmo2 // Elmo2 // Elmo2 // Elmo2 // Elmo2 // Elmo2 // Elmo2 // Elmo2 // Elmo2 // Elmo2 // Elmo2 // Elmo2 // Elmo2 // Elmo2 // Elmo2 // Elmo2 // Elmo2 // Elmo2 // Elmo2 // Elmo2 // Elmo2 // Elmo2 // Elmo2 // Elmo2 // Elmo2 // Elmo2 // Elmo2 // Elmo2 // Elmo2 // Elmo2 // Elmo2 // Elmo2 // Elmo2 // Elmo2	0.160517	0.848911	-1.30458	0.482153	3.44905	1.4651	6	0	0	0	0.336255	0.430909	-0.804364	-0.745362	-0.278859	0.89552	0.159492	0.111743	-0.113298	-0.830039	0.485081	1.61907	2.69926	-0.234109	0.318627	-0.0778025	-0.0583876	-1.40104	-0.781488	-1.73121
49497	TC1300000247.mm.1	Hist1h3f // Hist1h3f // Hist1h3f // Hist1h3f // Hist1h3f // Hist1h3f // Hist1h3f // Hist1h3f	0.782618	0.831089	-0.683432	0.380839	3.82351	1.46605	7	0	0	0	0.440537	1.40192	0.222986	-1.0534	-0.673615	-0.0374484	-0.790203	-1.19715	0.689829	2.33263	-0.143374	0.533802	1.56251	-0.785232	-0.907792	-0.569493	1.02379	-0.948218	-0.855104	-0.246975
40076	TC1000000928.mm.1	Tdg // Tdg // Gm9855 // Tdg // Tdg // Tdg // Tdg // Tdg // Tdg // Tdg // Tdg // Tdg // Tdg // Tdg // Tdg // Tdg // Tdg // Tdg // Tdg // Tdg // Tdg	0.5392	0.774074	-0.930662	0.160133	4.79043	1.46986	7	0	0	0	0.0210398	0.561718	0.24758	-1.15324	-1.31111	-1.36127	-0.424608	0.109342	-0.320818	1.32432	0.100392	1.84016	1.04976	2.0954	-0.277236	0.22888	0.0616671	-0.846109	-0.830528	-1.11535
25156	TC0700001151.mm.1	Prc1 // Prc1 // Prc1 // Prc1 // Prc1 // Prc1 // Prc1 // Prc1 // Prc1 // Prc1 // Prc1 // Prc1 // Prc1 // Prc1 // Prc1 // Prc1 // Prc1 // Prc1 // Prc1 // Prc1 // Prc1 // Prc1 // Prc1 // Prc1 // Prc1 // Prc1 // Prc1 // Prc1 // Prc1 // Prc1 // Prc1 // Prc1 // Prc1 // Prc1 // Prc1 // Prc1 // Prc1 // Prc1	0.488182	0.899507	-0.982142	0.273606	3.92203	1.47032	7	0	0	0	0.157493	0.656331	-0.316142	-1.45673	-1.08329	0.100293	0.187526	0.0563395	-0.327151	-0.161877	1.59288	1.81574	2.40824	-0.415748	-0.0936867	0.128983	-0.302786	-0.849744	-0.79992	-1.29676
33016	TC0900001170.mm.1	Plscr1 // Plscr1 // Plscr1 // Plscr1 // Plscr1 // Plscr1	0.534712	0.442769	-0.938674	0.37107	5.41979	1.47339	4	0	0	0	0.326955	0.574188	-0.134122	-1.14388	-1.36134	-1.29653	0.330608	0.149519	1.34065	0.613159	0.628132	0.394028	0.338308	2.30898	-1.23588	0.00549372	0.977752	-0.585495	-0.905164	-1.32536
32054	TC0900000201.mm.1	---	0.570007	0.79129	-0.903977	0.638791	3.10421	1.47398	4	0	0	0	0.378377	0.352982	1.29925	0.0341769	-0.4862	0.970786	-1.70736	1.24165	-0.336353	0.102262	1.97597	0.217559	-0.686934	0.510837	-1.46853	-0.593569	0.907021	-0.980697	-0.230291	-1.50094
19875	TC0500003181.mm.1	Oas1a // Oas1a // Oas1a // Oas1a // Oas1a // Oas1a // Oas1a	0.755395	0.950607	-0.719254	0.367869	3.53314	1.47465	7	0	0	0	-0.0403472	1.305	0.216009	-1.43993	-1.28837	-0.28459	-0.153891	-0.491708	0.348524	0.899593	2.59479	-0.0358054	1.02664	-0.588577	-0.366735	-0.781862	1.23901	-0.359808	-0.702949	-1.095
15868	TC0400003366.mm.1	Kif2c // Kif2c // Kif2c // Kif2c // Kif2c // Kif2c // Kif2c // Kif2c // Kif2c // Kif2c // Kif2c // Kif2c // Kif2c // Kif2c // Kif2c // Kif2c // Kif2c // Kif2c // Kif2c // Kif2c	0.543248	0.712353	-0.934141	0.628682	3.26908	1.47739	4	0	0	0	0.335305	1.29317	0.401326	-1.5991	-1.17571	-1.34524	0.545169	0.296339	-0.492092	0.416745	1.64553	0.202745	1.84285	-0.418706	0.181484	-0.171886	0.844483	-0.945164	-0.300019	-1.55724
18612	TC0500001903.mm.1	Gm22897	0.423438	0.723352	-1.05457	0.752316	2.87981	1.47801	3	0	0	0	0.579188	1.11245	0.119174	-0.864466	-1.34536	-1.57457	0.571293	-0.719252	-0.527961	-0.275425	1.49721	0.459426	1.18634	0.0272829	0.892576	1.01879	1.00702	-1.43964	-0.187672	-1.53641
40952	TC1000001813.mm.1	Tnfaip3 // Tnfaip3 // Tnfaip3 // Tnfaip3 // Tnfaip3 // Tnfaip3 // Tnfaip3 // Tnfaip3 // Tnfaip3 // Tnfaip3 // Tnfaip3 // Tnfaip3 // Tnfaip3 // Tnfaip3 // Tnfaip3 // Tnfaip3 // Tnfaip3 // Tnfaip3 // Tnfaip3 // Tnfaip3	0.332127	0.613081	-1.14657	0.572855	3.66164	1.4787	4	0	0	0	0.555237	0.810096	0.287198	-0.866509	-1.87706	-0.563618	1.57267	-0.557422	-0.834713	-0.0242454	1.00076	0.530552	1.47509	0.852064	-0.324435	0.658941	0.745101	-0.591652	-1.11225	-1.73582
19422	TC0500002725.mm.1	---	0.7648	0.743002	-0.71441	0.277659	4.57448	1.47921	7	0	0	0	0.501492	-0.0852002	0.847529	-0.325198	0.513952	-0.919194	0.849719	0.875739	0.280294	0.765071	2.27439	0.770026	-0.222672	-0.680374	-1.86589	-1.76188	0.325427	-0.504467	-0.609529	-1.02923
32817	TC0900000967.mm.1	---	0.763392	0.911073	-0.717568	0.196076	4.08559	1.48096	7	0	0	0	2.15225	0.386894	1.54608	-0.456155	0.293155	-0.836489	0.0388919	-0.483056	1.34974	-0.0516693	-0.196145	0.156595	-1.955	0.301879	0.109121	-1.35556	1.15217	-0.527759	-0.705582	-0.919362
44816	TC1100002477.mm.1	---	0.831185	0.666738	-0.649856	0.295902	4.8646	1.48104	7	0	0	0	1.25842	-0.0764535	0.825033	-0.281218	-1.06563	-0.492507	-0.611136	-1.23853	0.314899	1.89585	0.440484	1.16006	1.30455	-0.837416	1.43371	-1.22326	-0.857293	-0.609214	-0.376377	-0.963979
50486	TC1300001243.mm.1	---	0.894439	0.96435	-0.590186	0.132917	3.98578	1.48463	6	0	0	0	2.6117	0.740044	1.16713	-0.724007	-0.912024	-0.648466	-0.39803	-1.30012	1.42978	0.16414	-0.354203	0.502488	-1.05788	-0.120508	1.29782	-0.537037	-0.0902597	-0.743647	-0.511386	-0.515525
27062	TC0700003075.mm.1	E2f8 // E2f8 // E2f8 // E2f8 // E2f8 // E2f8 // E2f8 // E2f8 // E2f8 // E2f8 // E2f8 // E2f8 // E2f8	0.680224	0.580827	-0.807248	0.323068	5.16355	1.48747	6	0	0	0	0.441244	1.05942	-0.0570459	-1.54296	-1.29033	-0.70732	-0.615456	0.069128	0.0954774	0.907177	0.69376	1.62154	2.22021	-0.15977	0.933049	-0.767236	-0.479132	-0.706907	-0.546256	-1.16858
23231	TC0600002825.mm.1	---	1.06874	0.618604	-0.418777	0.385504	4.60806	1.48752	6	0	0	0	1.4974	0.893363	0.552261	0.158318	-0.204727	-1.4082	0.118966	-0.911241	0.584733	2.23756	0.607449	1.10842	-0.400798	-1.89929	-0.415131	-0.275641	-0.987117	-0.702743	0.0200826	-0.57367
63680	TC1800001587.mm.1	Gm14328	0.779564	0.608073	-0.708239	0.357785	4.81462	1.4878	6	0	0	0	1.01713	0.301949	1.95237	-1.28778	-1.41113	-0.360214	-0.374855	0.710294	0.249763	0.478282	0.427188	1.03026	1.65219	0.580387	-1.48275	-0.957074	-0.401292	-0.784501	-0.318472	-1.02174
29433	TC0800000805.mm.1	---	0.567493	0.871655	-0.923111	0.212842	4.23917	1.4906	7	0	0	0	1.88471	0.442575	0.752842	-0.458055	0.440703	-0.556534	-1.67327	0.156428	1.1742	0.661959	-0.815372	-0.128459	-1.37504	0.15938	1.0887	-0.584927	1.59949	-0.741582	-0.870393	-1.15736
46547	TC1100004217.mm.1	Arhgdia // Arhgdia // Arhgdia // Arhgdia // Arhgdia // Arhgdia // Arhgdia // Arhgdia // Arhgdia // Arhgdia	0.487784	0.900535	-1.00661	0.348678	3.779	1.49439	7	0	0	0	-0.510135	0.147874	-0.0504792	-0.710381	-1.30634	-0.142421	0.07789	-0.591958	0.188823	0.39789	2.25359	0.986929	1.55167	1.06886	0.339074	-1.5026	0.821536	-0.90105	-1.39586	-0.722902
33746	TC0900001908.mm.1	Anln // Anln // Anln // Anln // Anln // Anln	0.50339	0.859595	-0.99196	0.191718	4.35664	1.49535	7	0	0	0	0.133845	1.10428	-0.684436	-1.53395	-1.5331	0.161522	0.0513326	-0.0467495	-0.343528	0.4967	1.69941	1.11745	2.19039	-0.137618	0.414049	-0.195312	0.0815827	-0.858342	-0.90591	-1.21163
60358	TC1700001055.mm.1	---	0.374875	0.612542	-1.12137	0.798581	2.90013	1.49625	3	0	0	0	0.297342	0.386763	1.40782	0.18328	-0.283048	0.47025	-0.863803	0.747202	0.360506	0.324984	-0.696193	0.542901	0.380851	2.29076	-1.22583	-1.40775	0.448075	-1.40131	-0.22051	-1.74229
8743	TC0200004942.mm.1	E2f1 // E2f1 // E2f1 // E2f1 // E2f1 // E2f1 // E2f1	0.554865	0.638624	-0.94287	0.377976	4.60276	1.49773	6	0	0	0	-0.133499	0.800702	0.307327	-1.30485	-1.43466	-0.548916	-0.134335	0.320669	-0.189208	0.414755	1.20221	1.48177	2.65112	-0.237899	0.0755634	-0.412868	-0.0292753	-1.27055	-0.52936	-1.0287
42848	TC1100000491.mm.1	Gm12181	0.638455	0.77646	-0.859284	0.337901	4.25011	1.49774	7	0	0	0	-0.340602	1.43487	0.247885	-1.82277	-0.445877	-0.716471	-1.46274	-0.242427	0.0377851	0.523766	0.704903	1.86058	1.14431	0.0916702	-0.337725	1.50469	0.396006	-0.789403	-1.22666	-0.561788
3766	TC0100003814.mm.1	Dtl // Dtl // Dtl	0.529621	0.855046	-0.970544	0.367391	3.88072	1.50016	7	0	0	0	0.340675	0.768026	-0.341849	-1.6961	-1.48367	0.318378	-0.124547	0.330649	-0.174806	-0.130151	1.94934	1.29611	1.99785	-0.324054	0.127258	-0.231027	0.289541	-1.24805	-0.553907	-1.10967
15833	TC0400003331.mm.1	Rad54l // Rad54l // Rad54l // Rad54l // Rad54l // Rad54l // Rad54l // Rad54l // Rad54l // Rad54l // Rad54l // Rad54l // Rad54l // Rad54l // Rad54l // Rad54l // Rad54l // Rad54l // Rad54l // Rad54l // Rad54l // Rad54l // Rad54l	0.535091	0.5076	-0.965431	0.402675	4.97808	1.50052	4	0	0	0	0.81621	0.91662	0.550201	-0.922169	-1.43199	-1.58914	-0.549544	1.04262	0.419519	-0.481036	1.05551	0.468614	1.69418	-1.06193	0.318217	0.662791	0.987622	-1.17678	-0.501084	-1.21843
23541	TC0600003136.mm.1	Ncapd2 // Ncapd2 // Ncapd2 // Ncapd2 // Ncapd2 // Ncapd2	0.59992	0.864424	-0.900898	0.396148	3.76314	1.50082	7	0	0	0	-0.28537	1.42696	-0.0651989	-1.36885	-1.40449	-0.298902	0.171066	0.055405	-0.084114	0.111856	1.73573	1.35957	2.24535	-0.312629	-0.21509	-0.0680481	-0.300557	-0.770681	-0.586248	-1.34576
45769	TC1100003434.mm.1	Brip1 // Brip1 // Brip1 // Brip1 // Brip1 // Brip1 // Brip1 // Brip1 // Brip1 // Brip1 // Brip1	0.488812	0.630458	-1.01208	0.382971	4.6171	1.50089	6	0	0	0	0.340617	0.835103	0.146303	-1.62923	-1.33748	0.191235	-0.238119	0.422466	-0.176681	-0.102503	1.6086	0.770241	2.35691	-0.472002	-0.722418	0.615222	0.427959	-1.0218	-0.624334	-1.39009
40093	TC1000000945.mm.1	---	0.91391	0.95002	-0.590248	0.514296	3.22822	1.50416	7	0	0	0	-0.0193097	0.244523	2.65069	0.452733	-1.3653	-0.866854	-0.388626	-1.24946	0.0572888	1.31596	1.33205	0.816162	0.538265	-0.124879	-0.932567	-0.675376	-0.0145584	-0.084967	-0.57267	-1.11311
30578	TC0800001962.mm.1	---	0.904411	1.02954	-0.600169	0.0598814	3.85135	1.50458	6	0	0	0	1.77084	0.450802	2.59545	0.182476	-0.704017	-0.125933	-1.59335	-0.0771991	0.362496	0.922344	-0.593234	0.822183	-1.2696	0.358721	0.0476177	-0.879971	-0.469112	-0.531713	-0.625967	-0.642828
49947	TC1300000698.mm.1	---	0.479777	0.676877	-1.02574	0.15836	5.54146	1.50551	7	0	0	0	0.430723	1.66639	0.708602	0.801082	-0.434607	-0.730016	1.45057	0.575876	-0.0972004	-0.215111	-0.0501405	0.915177	-1.04715	-0.670899	-1.95882	1.47834	0.254392	-1.0904	-0.845278	-1.14154
26663	TC0700002670.mm.1	---	0.767316	1.0901	-0.738291	0.0130032	3.65361	1.50561	6	0	0	0	0.266257	-0.379025	1.10799	0.75439	-0.333505	-0.750322	0.173109	-1.50413	0.834502	2.93415	-0.0957666	0.70311	0.345339	0.388397	-1.28904	-0.789148	-0.15143	-0.750185	-0.740281	-0.724408
59932	TC1700000622.mm.1	Psmb8 // Psmb8 // Psmb8 // Psmb8 // Psmb8 // Psmb8 // Psmb8 // Psmb8 // Psmb8 // Psmb8 // Psmb8	0.587737	0.911533	-0.918569	0.227979	4.08419	1.50631	7	0	0	0	-0.153921	1.49039	-0.288271	-0.642	-1.18521	0.471772	-0.540828	0.133829	0.423815	0.144684	2.18578	0.311678	0.745826	-1.13676	0.821146	-1.44286	1.41664	-1.17574	-0.741288	-0.838678
29975	TC0800001353.mm.1	---	0.75071	1.12981	-0.757121	0.172044	3.43917	1.50783	6	0	0	0	1.67528	0.0431641	2.82148	-0.0804699	-0.236105	-0.314107	-1.13589	0.318963	0.442485	0.712043	-0.086998	-0.35248	-0.667842	-0.416309	-0.903662	-0.898024	1.34984	-0.953448	-0.685239	-0.632674
6705	TC0200002889.mm.1	Gm13384	0.516655	1.04019	-0.991476	0.225836	3.64096	1.50813	7	0	0	0	-0.0590631	-0.578106	0.847647	-0.0683238	-0.830813	-0.839875	0.88486	-0.88145	-0.448469	2.42764	1.02303	0.403901	1.13257	0.262591	0.530506	-1.56693	0.734711	-1.10143	-0.73172	-1.14128
54889	TC1500000053.mm.1	Nup155 // Nup155 // Nup155 // Nup155 // Nup155 // Nup155 // Nup155	0.387726	1.01755	-1.12045	0.207201	3.74448	1.50817	7	0	0	0	-0.646934	0.22058	-0.0862312	-1.30727	-0.917836	0.0165971	-0.088027	0.187456	-0.135993	-0.239375	2.13792	1.46412	2.14122	0.757486	0.234734	-0.23219	-0.14491	-0.930852	-1.08886	-1.34163
6124	TC0200002301.mm.1	Tpx2 // Tpx2 // Tpx2 // Tpx2 // Tpx2 // Tpx2 // Tpx2 // Tpx2 // Tpx2 // Tpx2 // Tpx2 // Tpx2 // Tpx2 // Tpx2 // Tpx2 // Tpx2 // Tpx2 // Tpx2 // Tpx2 // Tpx2 // Tpx2 // Tpx2 // Tpx2 // Tpx2 // Tpx2 // Tpx2 // Tpx2 // Tpx2 // Tpx2	0.482453	0.838969	-1.02632	0.126872	4.63594	1.50877	6	0	0	0	0.0675982	0.570497	0.03358	-1.47672	-1.19447	-0.331395	-0.0342731	0.059066	-0.0152577	-0.512419	1.49034	1.74283	2.45948	-0.190124	0.374329	-0.0428372	0.0787321	-1.07934	-0.881537	-1.11808
13968	TC0400001455.mm.1	Eva1b // Eva1b // Eva1b // Eva1b // Eva1b // Eva1b // Eva1b // Eva1b // Eva1b // Eva1b // Eva1b // Eva1b	0.503131	0.544527	-1.00581	0.506306	4.2208	1.50894	4	0	0	0	1.53699	0.391031	0.0048807	-0.184791	-0.925496	-0.513357	-0.863486	1.70624	0.0372558	0.15138	0.575803	0.824578	-0.974665	0.165618	1.83508	-1.48484	0.735202	-0.423629	-1.25057	-1.34322
28283	TC0700004310.mm.1	Kif22 // Kif22 // Kif22 // Kif22 // Kif22	0.663895	0.75288	-0.845496	0.119259	5.15549	1.50939	6	0	0	0	1.1073	0.754764	-0.35189	-1.72634	-1.58708	1.17836	0.0907892	0.552833	0.255549	-0.0450322	1.79261	1.13396	1.13691	-0.400617	-0.532387	-1.14096	0.317723	-0.711689	-0.884217	-0.940583
32705	TC0900000854.mm.1	2810417H13Rik // 2810417H13Rik // 2810417H13Rik // 2810417H13Rik // 2810417H13Rik // 2810417H13Rik // 2810417H13Rik // 2810417H13Rik	0.565574	0.780808	-0.944255	0.312675	4.36427	1.50983	7	0	0	0	0.291693	1.3148	0.0964564	-1.7802	-1.28242	0.872055	-0.35406	0.427292	0.17846	-0.495892	1.77908	0.794418	1.75891	-0.333202	-0.0366397	-0.92874	0.53075	-0.646482	-0.916325	-1.26996
56383	TC1500001568.mm.1	Atad2 // Atad2 // Atad2 // Atad2 // Atad2 // Atad2	0.468952	0.836974	-1.04196	0.483531	3.5811	1.51091	6	0	0	0	0.134198	0.735576	0.447827	-1.36838	-1.39596	0.0237723	-0.259848	0.231096	-0.401341	-0.381754	2.04488	0.703281	2.29425	0.296756	-0.391193	0.193332	0.219374	-0.825205	-0.704723	-1.59594
63303	TC1800001206.mm.1	Slc25a2 // Slc25a2 // Slc25a2 // Slc25a2 // Slc25a2 // Slc25a2	0.369499	0.828024	-1.14292	0.462986	3.67466	1.51242	6	0	0	0	1.87878	0.594361	0.139507	-0.507615	0.440122	-1.1404	0.466798	1.28192	-0.55301	0.302373	-0.497865	0.722349	0.133601	-0.352641	1.66977	-1.66533	0.51604	-0.840833	-0.911972	-1.67595
13212	TC0400000692.mm.1	---	0.313188	0.944911	-1.19943	0.751367	2.69196	1.51262	4	0	0	0	1.62218	0.188054	0.321298	-0.735314	-0.121085	-0.137496	0.943538	0.725214	-1.19522	1.35593	-0.0781955	-0.0217339	-0.195741	0.723866	-0.650587	-1.01731	1.8709	-1.47712	-0.348748	-1.77244
11050	TC0300001759.mm.1	---	0.572405	0.803117	-0.940806	0.211946	4.62351	1.51321	7	0	0	0	1.94404	0.458084	0.456397	-0.762125	-0.166917	-0.941717	-0.0193277	1.35771	-0.237214	-0.442695	0.768103	1.06012	-0.935906	-0.192198	-1.7452	1.51463	0.706634	-0.696585	-1.04919	-1.07664
13089	TC0400000567.mm.1	Smc2 // Smc2 // Smc2 // Smc2 // Smc2 // Smc2 // Smc2 // Smc2 // Smc2 // Smc2 // Smc2 // Smc2 // Smc2	0.515595	0.889305	-1.00479	0.0381131	4.51359	1.52038	6	0	0	0	-0.240353	0.731249	-0.0705672	-1.17543	-1.00187	-0.200482	-0.116278	-0.0574808	-0.117653	-0.149309	1.70382	1.75198	2.53699	-0.683253	0.0790558	0.0833377	-0.0594111	-0.984407	-1.04875	-0.981193
27628	TC0700003647.mm.1	Mesdc1 // Mesdc1 // Mesdc1 // Mesdc1 // Mesdc1 // Mesdc1	0.820634	0.877342	-0.699794	0.825765	2.61809	1.52043	4	0	0	0	1.46544	-0.00913873	2.39354	-1.00075	0.410702	0.0948269	-0.872935	-1.0171	0.144205	1.09999	0.407469	0.242932	0.669835	-0.455682	0.485178	-1.70349	-0.255638	-0.378908	-0.0826377	-1.63784
60301	TC1700000997.mm.1	Chaf1a // Chaf1a // Chaf1a // Chaf1a // Chaf1a // Chaf1a	0.48324	1.00232	-1.03817	0.496625	3.2022	1.52141	7	0	0	0	-0.0403601	1.77374	0.300422	-1.24855	-1.5226	-0.356426	0.788871	0.627084	-0.678613	-0.612062	1.08987	1.54968	1.57339	0.131121	-0.238705	0.132111	-0.154466	-0.767657	-0.735525	-1.61132
6667	TC0200002851.mm.1	Hspa14 // Hspa14 // Hspa14 // Hspa14 // Hspa14 // Hspa14 // Hspa14 // Hspa14 // Hspa14 // Hspa14 // Hspa14 // Hspa14 // Hspa14 // Hspa14 // Hspa14 // Hspa14 // Hspa14 // Hspa14 // Hspa14 // Hspa14 // Hspa14 // Hspa14 // Hspa14 // Hspa14 // Hspa14	0.427695	0.845636	-1.09429	0.180144	4.52813	1.52198	7	0	0	0	-0.342715	0.637085	-0.510186	-0.774731	-0.713794	-0.0155832	-0.651935	0.362151	0.075216	0.282791	0.862015	1.98966	2.75018	0.0404988	-0.733761	-0.0156483	0.0416114	-0.98745	-0.993135	-1.30227
8809	TC0200005009.mm.1	Gm14276	0.830256	1.0219	-0.69516	0.30945	3.58447	1.52542	7	0	0	0	2.04359	0.736421	0.277064	-0.859281	-1.23056	-1.31315	0.0147254	-0.910548	2.44395	0.0628743	-0.255559	0.503443	0.977691	-0.371478	0.0858934	-0.479953	0.360349	-0.699411	-0.383607	-1.00246
48766	TC1200002158.mm.1	Sel1l // Sel1l // Sel1l // Sel1l // Sel1l // Sel1l // Sel1l // Sel1l // Sel1l // Sel1l // Sel1l // Sel1l // Sel1l // Sel1l // Sel1l // Sel1l // Sel1l // Sel1l // Sel1l // Sel1l // Sel1l // Sel1l // Sel1l // Sel1l // Sel1l // Sel1l // Sel1l // Sel1l // Sel1l	0.595452	0.977184	-0.93198	0.573819	3.07855	1.52743	6	0	0	0	-0.461996	0.828974	0.133614	-0.0886843	-0.357196	0.271519	-0.0640347	0.755906	0.748215	-0.178593	2.52427	0.573675	-0.750012	0.281683	0.502123	-2.37523	0.451709	-0.447973	-1.56587	-0.782103
56224	TC1500001406.mm.1	---	0.799796	0.628202	-0.729802	0.379027	4.73708	1.5296	6	0	0	0	1.49473	1.2014	1.15405	0.138205	-0.139425	-0.229655	-0.103298	-1.05168	0.689998	1.07035	-0.333324	0.321367	-1.14785	-1.2049	-1.93185	1.09068	1.17061	-0.856506	-1.02925	-0.303655
3735	TC0100003783.mm.1	Cenpf // Cenpf // Cenpf // Cenpf // Cenpf // Cenpf // Cenpf // Cenpf // Cenpf // Cenpf // Cenpf // Cenpf	0.544468	0.780069	-0.987065	0.323848	4.38677	1.53153	7	0	0	0	0.571431	1.30787	-0.0673328	-1.59064	-1.37179	0.0121615	-0.244006	0.151778	-0.329093	-0.257138	1.00325	1.58229	2.21796	-0.477155	-0.0866298	0.685726	-0.147492	-0.656681	-1.00056	-1.30396
60812	TC1700001510.mm.1	---	0.581021	1.08418	-0.950515	0.248247	3.52789	1.53154	7	0	0	0	0.284957	-0.274501	-0.25309	-1.52324	-0.86024	-0.23879	-0.489207	-0.0637214	-0.28369	0.371689	2.29084	1.93094	1.67177	0.0945295	0.65985	-0.378047	-0.0885034	-1.05652	-0.666863	-1.12816
32618	TC0900000767.mm.1	Larp6 // Larp6 // Larp6 // Larp6 // Larp6 // Larp6	0.862494	0.983627	-0.669328	0.514959	3.21786	1.53182	7	0	0	0	0.322118	2.62116	0.042436	-0.87604	-1.04316	-0.996607	1.06203	-1.3828	1.55272	1.07065	-0.225922	0.654299	-0.0235519	-0.414079	-0.0383074	-0.176256	-0.1407	-0.0749327	-0.980783	-0.952268
41800	TC1000002664.mm.1	Apaf1 // Apaf1 // Apaf1 // Apaf1 // Apaf1 // Apaf1 // Apaf1 // Apaf1 // Apaf1 // Apaf1 // Apaf1 // Apaf1 // Apaf1 // Apaf1 // Apaf1 // Apaf1 // Apaf1 // Apaf1 // Apaf1 // Apaf1 // Apaf1 // Apaf1 // Apaf1 // Apaf1 // Apaf1 // Apaf1 // Apaf1 // Apaf1	0.391397	0.667283	-1.14069	0.24934	5.27576	1.53209	7	0	0	0	-0.780041	0.268148	0.849684	-0.87105	-1.29477	-0.62105	-0.249261	0.00265861	-0.0108765	0.459415	1.31023	0.643221	1.60252	2.25094	-0.233159	-0.52301	0.618479	-1.10011	-0.914129	-1.40783
14109	TC0400001596.mm.1	Rpa2 // Rpa2 // Rpa2 // Rpa2 // Rpa2 // Rpa2 // Rpa2 // Rpa2 // Rpa2 // Rpa2 // Rpa2 // Rpa2 // Rpa2 // Rpa2 // Rpa2 // Rpa2 // Rpa2	0.489972	0.816763	-1.04365	0.405791	3.9573	1.53362	7	0	0	0	-0.0303944	1.42653	-0.852741	-0.943018	-0.970925	-0.170214	-0.313574	0.236853	0.498775	0.235754	0.688388	1.46349	2.68804	-0.617717	-0.216126	0.163103	-0.155279	-0.679939	-0.969668	-1.48134
40424	TC1000001282.mm.1	E2f7 // E2f7 // E2f7 // E2f7 // E2f7 // E2f7 // E2f7 // E2f7 // E2f7 // E2f7 // E2f7 // E2f7 // E2f7 // E2f7 // E2f7 // E2f7 // E2f7 // E2f7 // E2f7 // E2f7 // E2f7 // E2f7 // E2f7 // E2f7 // E2f7 // E2f7	0.62931	0.721447	-0.905479	0.140955	5.39343	1.53479	6	0	0	0	0.515308	0.615229	-0.371873	-1.82149	-1.10869	-1.13543	0.240187	0.251242	0.0483837	0.494246	1.39517	1.7087	2.05305	-0.214272	0.316301	0.219523	-0.489153	-0.769578	-0.895863	-1.051
17987	TC0500001270.mm.1	Cit // Cit // Cit // Cit // Cit // Cit // Cit // Cit // Cit // Cit // Cit // Cit // Cit // Cit // Cit // Cit // Cit // Cit // Cit // Cit // Cit // Cit // Cit // Cit // Cit // Cit // Cit // Cit // Cit // Cit // Cit // Cit // Cit // Cit // Cit // Cit // Cit // Cit // Cit // Cit // Cit // Cit // Cit // Cit // Cit // Cit // Cit	0.726604	1.10729	-0.808502	0.371053	3.26507	1.53511	7	0	0	0	0.00666234	1.46695	-0.213994	-1.47439	-1.4484	0.0142888	-0.132669	0.0888452	0.0728554	0.253403	2.90316	0.597195	0.869217	-0.75991	0.206486	-0.149961	0.125769	-0.782265	-0.451263	-1.19198
30259	TC0800001639.mm.1	Shcbp1 // Shcbp1 // Shcbp1 // Shcbp1 // Shcbp1	0.517748	0.786917	-1.01863	0.582209	3.42305	1.53638	5	0	0	0	0.317492	0.615094	-0.391471	-1.17328	-1.20695	0.762207	0.700929	0.410637	-0.325555	0.990971	1.89763	0.520081	1.67938	-0.677816	-1.07053	-0.743918	0.750993	-1.34435	-0.34646	-1.36508
34559	TC0900002724.mm.1	Mb21d1 // Mb21d1 // Mb21d1 // Mb21d1 // Mb21d1 // Mb21d1 // Mb21d1 // Mb21d1 // Mb21d1 // Mb21d1 // Mb21d1	0.614004	0.703235	-0.92408	0.410471	4.31919	1.53808	6	0	0	0	1.91023	-0.224345	0.0580748	-1.0546	-0.848136	0.866409	-0.540358	-1.22082	0.186733	0.800066	0.769127	0.798141	0.125653	0.130733	2.15335	-1.20661	0.0685949	-0.599524	-1.3855	-0.787218
22013	TC0600001599.mm.1	---	0.868416	0.73319	-0.669715	0.319279	4.62139	1.53813	7	0	0	0	0.444728	1.72761	-0.541463	-1.31644	-1.15928	-1.08332	0.416929	0.507944	0.971937	1.34249	1.01324	1.12037	1.29539	-0.855578	-1.2975	-0.2488	-0.329114	-0.339977	-0.691778	-0.97739
10019	TC0300000714.mm.1	Iqgap3 // Iqgap3 // Iqgap3 // Iqgap3 // Iqgap3 // Iqgap3 // Iqgap3	0.553488	0.659668	-0.985659	0.451936	4.26476	1.53915	5	0	0	0	1.43587	0.591741	0.133833	-1.52699	-1.22129	0.688259	0.290407	1.26812	-0.617022	0.524948	1.04438	0.760671	1.47223	-0.788411	-0.234221	-1.35841	0.492871	-0.819795	-0.640091	-1.49709
4870	TC0200001036.mm.1	Hat1 // Hat1 // Hat1 // Hat1 // Hat1 // Hat1 // Hat1 // Hat1 // Hat1 // Hat1 // Hat1 // Hat1	0.523268	0.828314	-1.01764	0.194477	4.63294	1.54091	7	0	0	0	-0.513949	0.308425	0.465138	-0.550109	-1.1639	0.227045	-0.89992	-0.98197	0.140175	0.00634704	1.36875	1.88799	2.47442	0.0500484	0.392481	-0.00991798	-0.14812	-0.879613	-1.24006	-0.933259
17214	TC0500000494.mm.1	Ncapg // Ncapg // Ncapg // Ncapg // Ncapg // Ncapg // Ncapg // Ncapg // Ncapg // Ncapg // Ncapg // Ncapg // Ncapg // Ncapg // Ncapg // Ncapg	0.619335	0.917045	-0.922638	0.640133	3.04326	1.54197	5	0	0	0	0.107327	1.24298	0.0713053	-1.72801	-1.24016	0.272091	0.166044	-0.101479	0.0270711	-0.539889	1.76998	1.65657	1.71431	-0.385157	0.0450422	-0.402597	0.0924843	-1.43918	-0.206484	-1.12225
34614	TC0900002779.mm.1	Pgm3 // Pgm3 // Pgm3 // Pgm3 // Pgm3 // Pgm3 // Pgm3 // Pgm3 // Pgm3 // Pgm3 // Pgm3	0.805428	1.14457	-0.738081	0.575941	2.82883	1.54351	7	0	0	0	0.0978007	2.71507	-0.788826	-0.672477	-1.14558	0.313557	0.452046	-0.894053	1.57238	1.25866	0.259626	0.523281	-0.0116388	0.213886	-0.957489	-0.685908	-0.0360936	-0.0839775	-1.16915	-0.961116
59865	TC1700000550.mm.1	Rrp1b // Rrp1b // Rrp1b // Rrp1b // Rrp1b // Rrp1b // Rrp1b // Rrp1b // Rrp1b // Rrp1b // Rrp1b // Rrp1b // Rrp1b // Rrp1b // Rrp1b // Rrp1b // Rrp1b // Rrp1b // Rrp1b // Rrp1b // Rrp1b // Rrp1b // Rrp1b // Rrp1b // Rrp1b // Rrp1b // Rrp1b // Rrp1b // Rrp1b	0.519588	1.02697	-1.02428	0.11678	3.91875	1.54387	6	0	0	0	-0.0966491	0.972248	-0.532876	-1.99236	-0.752245	0.575132	-0.207361	0.000148	-0.0604215	-0.124155	2.41349	1.06548	0.175412	0.694303	0.982334	-0.800732	0.761108	-1.02676	-1.13981	-0.906286
24412	TC0700000403.mm.1	Arhgef1 // Arhgef1 // Arhgef1 // Arhgef1 // Arhgef1 // Arhgef1 // Arhgef1 // Arhgef1 // Arhgef1 // Arhgef1 // Arhgef1 // Arhgef1 // Arhgef1 // Arhgef1 // Arhgef1 // Arhgef1 // Arhgef1 // Arhgef1 // Arhgef1 // Arhgef1 // Arhgef1 // Arhgef1 // Arhgef1 // Arhgef1 // Arhgef1 // Arhgef1 // Arhgef1 // Arhgef1 // Arhgef1 // Arhgef1 // Arhgef1 // Arhgef1 // Arhgef1 // Arhgef1 // Arhgef1 // Arhgef1 // Arh…	0.457896	1.04149	-1.0874	0.454258	3.26692	1.54529	7	0	0	0	0.221852	-0.038642	-0.771015	-0.372028	-0.849164	-1.04013	-0.591016	0.541873	-0.164029	2.49461	0.806257	0.656242	0.557998	1.69971	-0.433835	-0.415113	0.958613	-0.899986	-0.756827	-1.60538
54484	TC1400002515.mm.1	Diaph3 // Diaph3 // Diaph3 // Diaph3 // Diaph3	0.576019	0.953803	-0.969475	0.407923	3.58903	1.54549	7	0	0	0	0.235201	1.45022	0.152785	-1.45383	-1.47453	-0.279913	0.449379	0.148584	-0.259209	-0.710184	1.69207	1.47125	1.81127	-0.265701	0.262415	-0.208117	-0.113259	-0.962505	-0.565082	-1.38084
34325	TC0900002489.mm.1	Zwilch // Zwilch // Zwilch // Zwilch // Zwilch // Zwilch // Zwilch // Zwilch // Zwilch // Zwilch // Zwilch // Zwilch // Zwilch // Zwilch // Zwilch // Zwilch // Zwilch // Zwilch // Zwilch // Zwilch // Zwilch // Zwilch // Zwilch // Zwilch // Zwilch // Zwilch // Zwilch // Zwilch // Zwilch // Zwilch // Zwilch	0.485683	0.968284	-1.06055	0.525908	3.25158	1.54624	7	0	0	0	-0.0822289	0.697064	-0.0559189	-1.2078	-1.20927	0.0998839	-0.131684	0.0215597	-0.253646	-0.00276728	2.52842	0.56885	1.7521	-0.677911	-0.372331	0.607252	0.90009	-1.30571	-0.456827	-1.41912
61226	TC1700001938.mm.1	D17H6S56E-5 // D17H6S56E-5 // D17H6S56E-5 // D17H6S56E-5	0.618526	1.05987	-0.929059	0.275957	3.58974	1.54758	7	0	0	0	0.421103	1.14827	-0.362596	-1.42477	-1.40839	0.334776	-0.132277	0.659309	-0.574166	-0.146374	2.08529	1.75815	0.399049	0.909942	0.397428	-1.02688	-0.250694	-0.690547	-0.865321	-1.23131
45004	TC1100002667.mm.1	Maml1 // Maml1 // Maml1 // Maml1 // Maml1 // Maml1 // Maml1 // Maml1 // Maml1	1.07821	0.581661	-0.469764	0.745212	3.20384	1.54798	3	0	0	0	0.992726	0.610944	0.597601	-1.40871	-1.17658	-1.47408	-0.562502	-0.711612	1.19034	1.58681	2.06458	0.504477	-0.119882	0.171277	-0.504433	0.23345	-0.585116	0.354602	-1.09562	-0.668276
11185	TC0300001894.mm.1	n-R5s195	0.693257	1.0078	-0.85663	0.0776455	4.04101	1.54989	6	0	0	0	2.44078	1.175	0.366402	-0.834125	-0.108068	-0.450813	0.12925	0.853528	0.53835	0.599288	-0.940124	0.6731	-1.03526	-0.10491	-0.893568	-1.29393	1.45499	-0.802964	-0.945663	-0.821263
61782	TC1700002497.mm.1	Ndc80 // Ndc80 // Ndc80 // Ndc80 // Ndc80	0.564841	0.869767	-0.986847	0.306511	4.15617	1.55169	7	0	0	0	-0.177979	1.00089	-0.0212758	-1.34508	-1.26238	0.10853	0.383419	-0.171233	-0.113005	-0.114715	1.70288	1.6771	2.21211	-0.649125	-0.442421	0.116566	0.0562653	-1.10196	-0.639444	-1.21913
21957	TC0600001542.mm.1	Gm22555	0.461101	1.06178	-1.0927	0.269423	3.61007	1.5538	7	0	0	0	2.70346	0.899039	-0.101329	-0.605408	-0.769521	-0.486381	0.305399	-0.941486	-0.0371675	0.164634	-0.291269	-0.109664	-0.614525	0.504963	-0.210441	1.26615	1.60165	-1.26094	-0.781954	-1.23522
4566	TC0200000732.mm.1	Gm13462	0.998907	0.660972	-0.555344	0.820247	2.90283	1.55425	3	0	0	0	1.69959	0.805604	1.1251	0.253063	-0.412561	-0.628948	-0.197977	-0.0527259	0.132896	1.99865	0.744161	0.486358	-1.24067	-0.407869	-0.277199	-2.15044	-0.210988	-0.266827	0.0816622	-1.48087
47040	TC1200000415.mm.1	G2e3 // G2e3 // G2e3 // G2e3 // G2e3 // G2e3 // G2e3 // G2e3 // G2e3 // G2e3 // G2e3 // G2e3 // G2e3 // G2e3 // G2e3 // G2e3 // G2e3 // G2e3 // G2e3 // G2e3	0.613965	1.15187	-0.941895	0.264394	3.3724	1.55586	7	0	0	0	-0.590344	0.37062	-0.261548	-1.00253	-1.234	-0.683511	-0.199218	0.0974548	0.451527	-0.0629251	2.51102	1.8794	1.02241	0.986666	-0.0689802	0.281901	-0.672263	-0.875559	-0.716987	-1.23314
27635	TC0700003654.mm.1	---	0.767951	0.955929	-0.789643	0.178145	4.14627	1.55759	6	0	0	0	0.351897	-0.0942714	2.25426	0.345621	-0.668569	-1.13843	0.360619	-1.29851	1.89077	0.432925	-0.224102	0.764173	-0.313391	1.26624	-0.911762	-1.04297	0.394425	-0.589384	-0.930491	-0.849052
18052	TC0500001335.mm.1	---	1.04901	0.699057	-0.513164	0.351133	4.69078	1.56218	7	0	0	0	1.49927	1.18018	1.98822	-0.620337	-0.625512	-1.71439	-0.782497	0.732544	0.794607	0.896956	-0.256903	1.24075	-0.778181	0.116663	-0.241744	-0.95665	-0.933489	-0.474881	-0.182742	-0.881871
21193	TC0600000772.mm.1	Mad2l1 // Mad2l1 // Mad2l1 // Mad2l1 // Mad2l1 // Mad2l1 // Mad2l1 // Mad2l1 // Mad2l1 // Mad2l1 // Mad2l1 // Mad2l1 // Mad2l1	0.577346	0.96052	-0.985005	0.138696	4.20248	1.56235	6	0	0	0	-0.209933	0.654358	-0.489404	-0.908632	-0.975352	0.0839644	0.464293	-0.663751	0.471564	-0.0989717	1.73696	1.97685	2.14982	-0.82678	0.192831	-0.631291	0.0284916	-1.13858	-0.947569	-0.868869
60307	TC1700001003.mm.1	Uhrf1 // Uhrf1 // Uhrf1 // Uhrf1 // Uhrf1 // Uhrf1 // Uhrf1 // Uhrf1 // Uhrf1 // Uhrf1 // Uhrf1 // Uhrf1 // Uhrf1 // Uhrf1 // Uhrf1 // Uhrf1 // Uhrf1 // Uhrf1 // Uhrf1 // Uhrf1 // Uhrf1 // Uhrf1 // Uhrf1 // Uhrf1 // Uhrf1 // Uhrf1 // Uhrf1	0.568027	0.691	-0.99559	0.705382	3.23192	1.56362	3	0	0	0	0.485912	0.896254	0.0145612	-1.75963	-1.33997	-0.585899	0.395059	0.154703	-0.268414	0.0963154	1.70518	1.04638	1.94007	0.0486698	0.423689	-0.638791	0.372678	-1.32024	-0.186337	-1.48019
55408	TC1500000578.mm.1	Gm19945	0.71602	1.04213	-0.847993	0.447528	3.32011	1.56401	7	0	0	0	0.0858238	1.4628	-0.385956	-1.47997	-1.52952	-0.499629	0.267576	0.163222	-0.523006	0.578978	1.84754	1.94596	0.998632	0.224124	0.14391	-0.148962	-0.607542	-1.30571	-0.411401	-0.826868
21550	TC0600001132.mm.1	---	0.65225	0.970853	-0.913354	0.507417	3.33428	1.5656	7	0	0	0	1.11183	0.700639	0.347672	-0.349609	-0.271512	0.188729	-1.4993	0.977319	2.38247	-0.0593635	-0.701146	0.783647	-0.693084	0.245783	-1.37399	-0.244242	1.19422	-1.21068	-1.20192	-0.327462
32441	TC0900000590.mm.1	Zw10 // Zw10 // Zw10 // Zw10 // Zw10 // Zw10 // Zw10	0.577556	1.09559	-0.989431	0.499266	3.10577	1.56699	7	0	0	0	-0.329905	-0.00618649	0.759918	-0.906302	-0.449454	0.377232	0.632697	-0.875843	-0.229363	0.0526306	2.78983	1.00597	1.57665	-0.303062	-0.378719	-0.962924	0.215126	-0.441334	-1.41826	-1.1087
10072	TC0300000769.mm.1	Adar // Adar // Adar // Adar // Adar // Adar // Adar // Adar // Adar // Adar // Adar // Adar // Adar // Adar // Adar // Adar // Adar // Adar // Adar // Adar // Adar // Adar // Adar // Adar // Adar // Adar // Adar // Adar	0.583233	0.846574	-0.984427	0.613541	3.2841	1.56766	5	0	0	0	-0.736926	1.43438	0.459321	-0.409775	-0.996049	0.62137	-0.1	0.279927	0.117182	0.164663	1.73037	0.913643	1.18191	-0.334382	-0.781199	-1.83349	1.24234	-0.319742	-1.52908	-1.10446
1401	TC0100001419.mm.1	Abl2 // Abl2 // Abl2 // Abl2 // Abl2 // Abl2 // Abl2 // Abl2 // Abl2 // Abl2 // Abl2 // Abl2 // Abl2 // Abl2 // Abl2 // Abl2	0.595835	0.767101	-0.976088	0.794989	2.89546	1.57192	3	0	0	0	0.146763	1.52786	0.296901	-1.19973	-1.66773	-1.4571	0.37756	0.72621	0.0115508	-0.180036	1.79051	0.577289	1.0109	0.640758	0.243486	-0.37858	0.46165	-0.676487	-0.374433	-1.87735
36607	TC0X00001421.mm.1	Alg13 // Alg13 // Alg13 // Alg13 // Alg13 // Alg13 // Alg13 // Alg13 // Alg13 // Alg13 // Alg13 // Alg13 // Alg13 // Alg13 // Alg13 // Alg13 // Alg13 // Alg13 // Alg13 // Alg13 // Alg13 // Alg13 // Alg13 // Alg13 // Alg13 // Alg13 // Alg13 // Alg13 // Alg13 // Alg13 // Alg13	0.606028	1.27408	-0.96985	0.184552	3.19519	1.57588	6	0	0	0	0.431311	-0.125557	0.0177724	-0.782436	-0.404863	-0.277455	-0.0942072	0.2607	-0.567692	-0.18695	2.98136	1.69195	1.19434	-1.13742	-0.318154	0.219407	0.00743616	-1.05379	-1.09752	-0.758248
64878	TC1900001037.mm.1	Naa40 // Naa40 // Naa40 // Naa40 // Naa40 // Naa40 // Naa40	0.670242	0.636031	-0.908284	0.456712	4.42389	1.57853	5	0	0	0	0.586869	0.51243	0.21192	-1.49177	-1.70137	-0.03059	-0.51189	0.0430143	0.450201	-0.0356183	1.08441	1.88148	1.40714	1.27449	0.567458	-0.941383	-0.581957	-0.444707	-1.35781	-0.922336
49876	TC1300000627.mm.1	---	0.404935	0.836389	-1.17565	0.333271	4.27093	1.58058	7	0	0	0	-0.635828	0.751655	0.166509	-0.132746	-1.11818	0.120659	0.483117	0.226807	0.120047	-0.350895	1.80254	0.980519	2.35889	-0.5485	-0.500963	-0.988135	0.791456	-1.5423	-0.891108	-1.09353
48038	TC1200001421.mm.1	Vsnl1 // Vsnl1 // Vsnl1 // Vsnl1 // Vsnl1	0.868299	0.776547	-0.714912	0.474317	3.94402	1.58321	6	0	0	0	1.17903	0.935849	0.691351	-0.0279586	-0.0761942	-0.158721	1.16904	-1.03404	0.88183	2.31061	0.166537	-0.087112	-1.39638	-0.351335	-1.76648	-0.602324	0.311029	-0.488858	-0.395907	-1.25997
26087	TC0700002089.mm.1	Tssc4 // Tssc4 // Tssc4 // Tssc4 // Tssc4 // Tssc4 // Tssc4 // Tssc4 // Tssc4 // Tssc4 // Tssc4 // Tssc4 // Tssc4 // Tssc4 // Tssc4 // Tssc4 // Tssc4 // Tssc4 // Tssc4 // Tssc4 // Tssc4 // Tssc4 // Tssc4	0.396152	0.688139	-1.19016	0.350064	4.81595	1.58631	7	0	0	0	1.46289	0.513308	-0.390261	-0.937764	-0.750782	0.31986	0.773018	1.28797	0.524689	-0.152082	-0.206657	1.02118	0.36707	1.24948	-0.135334	-2.12032	0.744227	-1.07075	-0.915425	-1.58431
23453	TC0600003047.mm.1	---	0.536313	1.06218	-1.0508	0.363479	3.50353	1.58711	7	0	0	0	1.90504	0.584794	0.60821	0.518465	-0.115716	-0.568064	-0.785846	-0.199392	-0.299371	1.71822	-1.12596	0.363259	-0.631606	-0.148941	-1.22818	1.57738	0.980116	-0.867174	-0.815769	-1.46946
44096	TC1100001749.mm.1	---	0.97185	0.786517	-0.617974	0.425847	4.12113	1.58982	7	0	0	0	0.169343	2.52404	1.01323	-0.805321	-0.757366	-1.92491	-0.769872	-0.321546	0.685969	1.35202	0.390513	0.667837	-0.700624	0.807492	0.300608	-0.319803	-0.457689	-0.413958	-0.332518	-1.10745
49411	TC1300000161.mm.1	Trim27 // Trim27 // Trim27 // Trim27 // Trim27 // Trim27 // Trim27 // Trim27 // Trim27 // Trim27 // Trim27 // Trim27 // Trim27	0.824557	0.821535	-0.767216	0.13307	4.97624	1.59177	6	0	0	0	0.484048	0.639612	1.90396	-0.764368	0.216056	-0.48661	0.0143126	-0.0120109	0.354387	-0.329558	1.91127	0.808176	-1.44368	0.247347	-2.20902	0.603197	0.364525	-0.613682	-0.838672	-0.849295
44245	TC1100001899.mm.1	Nup85 // Nup85 // Nup85 // Nup85 // Nup85 // Nup85 // Nup85 // Nup85 // Nup85 // Nup85 // Nup85 // Nup85 // Nup85 // Nup85 // Nup85 // Nup85 // Nup85 // Nup85 // Nup85 // Nup85 // Nup85 // Nup85	0.58901	1.26782	-1.00456	0.227736	3.207	1.59357	6	0	0	0	-0.265077	0.522404	0.283403	-1.24535	-0.696531	-0.689293	0.148844	0.530116	-0.276499	-0.692135	2.88299	1.66798	0.893411	-0.339402	-0.0604588	0.131755	0.217515	-1.20545	-0.75716	-1.05107
53907	TC1400001931.mm.1	Wdhd1 // Wdhd1 // Wdhd1 // Wdhd1 // Wdhd1 // Wdhd1 // Wdhd1 // Wdhd1 // Wdhd1 // Wdhd1 // Wdhd1 // Wdhd1 // Wdhd1 // Wdhd1	0.61761	0.765174	-0.978991	0.224061	5.03944	1.5966	7	0	0	0	0.772126	0.689927	-0.549675	-1.47446	-1.67164	-0.278113	0.502709	-0.30727	0.305357	0.0350173	1.54535	1.52517	2.07512	-0.0466675	-0.318303	0.188665	-0.0563461	-0.840983	-0.858473	-1.23752
17019	TC0500000298.mm.1	Cenpa // Cenpa // Cenpa // Cenpa // Cenpa // Cenpa // Cenpa // Cenpa // Cenpa // Cenpa // Cenpa // Cenpa // Cenpa // Cenpa // Cenpa // Cenpa // Cenpa	0.537898	0.646879	-1.05933	0.251357	5.61769	1.59723	7	0	0	0	0.651947	1.31494	-0.583455	-1.50292	-1.49766	-0.181792	-0.320688	-0.289924	0.17519	0.230357	0.938762	1.03755	2.2996	-0.215638	-0.128282	0.383213	0.866803	-0.810576	-1.05421	-1.31321
6637	TC0200002821.mm.1	Rtel1 // Rtel1 // Rtel1 // Rtel1 // Rtel1 // Rtel1 // Rtel1 // Rtel1 // Rtel1 // Rtel1 // Rtel1 // Rtel1 // Rtel1 // Rtel1 // Rtel1 // Rtel1 // Rtel1 // Rtel1 // Rtel1 // Rtel1 // Rtel1 // Rtel1 // Rtel1 // Rtel1 // Rtel1 // Rtel1 // Rtel1 // Rtel1 // Rtel1 // Rtel1 // Rtel1 // Rtel1 // Rtel1 // Rtel1 // Rtel1 // Rtel1 // Rtel1 // Rtel1 // Rtel1 // Rtel1 // Rtel1 // Rtel1 // Rtel1 // Rtel1 // Rte…	0.366762	0.881215	-1.23328	0.462821	3.74709	1.60004	7	0	0	0	0.369904	1.2465	-0.904077	-1.17033	-1.17117	-0.292843	0.880416	0.730831	-0.317048	-0.191691	0.897285	1.46646	1.98747	-0.208518	0.398209	-0.254924	0.233344	-1.27506	-0.750977	-1.67379
11668	TC0300002387.mm.1	---	0.702916	1.05976	-0.903689	0.235337	3.79841	1.60661	7	0	0	0	2.45603	0.366408	1.46459	-0.544299	-0.504388	0.231021	-1.55013	0.336721	1.02046	-0.316235	-0.644494	0.573661	-0.926048	0.160497	-0.91513	0.382138	1.12027	-0.735339	-1.1726	-0.80313
17783	TC0500001066.mm.1	Cdc7 // Cdc7 // Cdc7 // Cdc7 // Cdc7 // Cdc7 // Cdc7 // Cdc7 // Cdc7 // Cdc7 // Cdc7 // Cdc7 // Cdc7 // Cdc7 // Cdc7 // Cdc7 // Cdc7 // Cdc7 // Cdc7 // Cdc7 // Cdc7 // Cdc7 // Cdc7 // Cdc7 // Cdc7 // Cdc7	0.666784	1.17238	-0.939964	0.494385	3.04832	1.60675	7	0	0	0	-0.400926	1.31981	-0.147225	-1.14001	-1.21938	0.390679	-0.207671	-0.388686	-0.254836	0.199066	2.84833	1.10326	1.08704	-0.367832	-0.000126	0.159168	-0.16078	-0.389198	-1.08531	-1.34538
28420	TC0700004451.mm.1	Mki67 // Mki67 // Mki67 // Mki67	0.626645	0.818945	-0.981389	0.10481	5.09853	1.60803	6	0	0	0	0.369862	0.66655	-0.270356	-1.5584	-1.45242	0.0421692	-0.168511	-0.00541684	0.199025	-0.0462181	1.55413	1.91352	2.16105	-0.00490073	-0.204149	-0.0813199	-0.170446	-0.872771	-1.08192	-0.989475
18640	TC0500001931.mm.1	Dbf4 // Dbf4 // Dbf4 // Dbf4 // Dbf4 // Dbf4 // Dbf4 // Dbf4 // Dbf4 // Dbf4 // Dbf4 // Dbf4 // Dbf4 // Dbf4 // Dbf4 // Dbf4 // Dbf4 // Dbf4 // Dbf4 // Dbf4 // Dbf4 // Dbf4 // Dbf4 // Dbf4	0.414338	0.847911	-1.1941	0.25139	4.57183	1.60844	7	0	0	0	-0.0232878	0.757993	-0.456692	-1.59325	-1.2623	0.0950661	0.148069	-0.257535	0.0976586	-0.45631	1.6787	1.30231	1.79886	0.958728	0.366597	-0.271189	0.698875	-1.17497	-0.952816	-1.4545
50339	TC1300001096.mm.1	Gcnt4 // Gcnt4 // Gcnt4 // Gcnt4	0.781266	0.885811	-0.827943	0.193511	4.55926	1.60921	7	0	0	0	0.280488	0.59206	-0.425875	-1.05123	-0.0754052	-1.30802	-0.568469	-0.0954816	0.630814	0.533534	2.27962	1.57823	-0.506752	-0.345118	1.95773	-0.624824	-0.367464	-0.641126	-0.815187	-1.02752
9577	TC0300000267.mm.1	LOC100862007	0.468046	1.11029	-1.14352	0.409886	3.34504	1.61157	7	0	0	0	2.84354	0.355499	0.094625	-0.670581	-0.9641	0.398126	0.259173	0.38817	0.05203	0.0597281	-0.653756	0.524655	-1.15306	0.207151	-0.177444	0.259173	1.60763	-0.782544	-1.58911	-1.05891
61257	TC1700001969.mm.1	Tcf19 // Tcf19 // Tcf19 // Tcf19 // Tcf19 // Tcf19 // Tcf19 // Tcf19 // Tcf19 // Tcf19 // Tcf19 // Tcf19 // Tcf19 // Tcf19 // Tcf19 // Tcf19 // Tcf19 // Tcf19	0.580026	0.802133	-1.03322	0.250326	4.80328	1.61325	7	0	0	0	-0.0690913	1.18701	0.539348	-1.30221	-1.12164	0.0420714	0.950252	0.125026	0.0432663	-0.423187	1.86986	0.912987	1.26822	-0.55216	0.0703997	-1.55573	1.11526	-0.957231	-1.31274	-0.829699
57024	TC1500002217.mm.1	Racgap1 // Racgap1 // Racgap1 // Racgap1 // Racgap1 // Racgap1 // Racgap1 // Racgap1 // Racgap1 // Racgap1 // Racgap1 // Racgap1 // Racgap1 // Racgap1 // Racgap1 // Racgap1 // Racgap1 // Racgap1 // Racgap1 // Racgap1 // Racgap1 // Racgap1 // Racgap1 // Racgap1 // Racgap1 // Racgap1 // Racgap1 // Racgap1 // Racgap1 // Racgap1 // Racgap1 // Racgap1 // Racgap1 // Racgap1 // Racgap1 // Racgap1 // Rac…	0.642029	0.836672	-0.973422	0.616164	3.39396	1.61545	5	0	0	0	0.0863317	2.24333	-0.361512	-1.65291	-1.27696	-0.47608	-0.280796	-0.63441	0.20199	0.703374	0.992032	0.62866	1.51286	-0.264003	0.722965	0.21444	0.560961	-1.44026	-0.275024	-1.20498
39743	TC1000000592.mm.1	Dna2 // Dna2 // Dna2 // Dna2 // Dna2 // Dna2 // Dna2 // Dna2 // Dna2 // Dna2 // Dna2 // Dna2 // Dna2 // Dna2 // Dna2 // Dna2 // Dna2 // Dna2 // Dna2 // Dna2	0.541685	0.707355	-1.07645	0.421506	4.47586	1.61814	6	0	0	0	0.803254	0.726246	0.0571402	-1.04954	-1.31163	-0.752714	-0.339921	-0.856214	-0.114864	-0.127957	0.570426	1.87755	1.74327	0.0561528	1.05036	1.26338	-0.365578	-0.836703	-0.82951	-1.56315
3457	TC0100003500.mm.1	Nuf2 // Nuf2 // Nuf2 // Nuf2 // Nuf2 // Nuf2 // Nuf2 // Nuf2	0.509298	0.750895	-1.11147	0.5516	3.79946	1.62077	5	0	0	0	0.00415132	0.776049	0.181261	-1.26842	-1.14662	-0.579896	-0.096145	0.092615	0.887027	-0.696818	1.64201	0.771407	2.35434	-0.409875	-0.14866	0.444337	0.527668	-0.759854	-0.827357	-1.74721
20162	TC0500003472.mm.1	Mcm7 // Mir93 // Mir25 // Mcm7 // Mcm7 // Mcm7 // Mcm7 // Mcm7 // Mcm7 // Mcm7 // Mcm7 // Mcm7 // Mcm7 // Mcm7 // Mcm7 // Mcm7 // Mir93 // Mir25 // Mcm7 // Mcm7 // Mcm7 // Mcm7 // Mcm7 // Mcm7 // Mcm7 // Mcm7 // Mcm7 // Mcm7 // Mcm7 // Mir25 // Mir93	0.537166	1.04789	-1.08552	0.461662	3.39901	1.62268	7	0	0	0	0.159611	0.626911	0.268537	-1.38465	-1.20279	-0.352605	0.857646	0.450727	-0.3352	-0.767357	2.19304	1.61462	1.14437	0.57174	0.0166662	-0.605583	0.00088	-0.876669	-0.765187	-1.6147
60219	TC1700000914.mm.1	Gm5814	0.763782	0.922826	-0.859777	0.0767153	4.61768	1.62356	6	0	0	0	0.787775	2.33708	0.0710123	-1.34041	-0.473836	-1.18173	1.31019	0.294554	0.537848	1.22888	-0.593078	0.976948	-0.064889	0.0558004	-0.900792	-1.07829	0.612261	-0.787894	-0.850888	-0.94055
6876	TC0200003061.mm.1	Ptf1aos // RP23-34E4.3	0.692712	0.820966	-0.931394	0.395994	4.21379	1.62411	7	0	0	0	0.808277	0.233104	1.0465	-0.528494	-0.429236	-1.5205	1.49516	-0.635241	0.188714	2.15034	-0.441438	0.863492	-0.256859	1.22265	0.0674796	-1.29212	-0.177638	-0.487514	-1.05826	-1.24841
15909	TC0400003408.mm.1	Gm12856	0.429879	0.661751	-1.19502	0.257604	5.58389	1.62489	7	0	0	0	1.2077	0.656121	-0.23366	-0.810478	-0.730756	-0.589319	-1.85599	0.870454	1.04098	0.733616	-0.570185	0.174579	0.782662	0.821809	0.726814	-0.363576	1.72427	-1.24737	-0.915255	-1.42242
49848	TC1300000599.mm.1	Cks2 // Cks2 // Cks2 // Cks2 // Cks2 // Cks2 // Cks2 // Cks2	0.848983	0.720238	-0.775939	0.714805	3.28672	1.62492	3	0	0	0	0.709065	0.516761	0.297404	-1.18682	-0.736384	-1.48056	-0.684071	0.116618	0.0368902	0.746824	2.07338	1.56256	-0.102548	0.180794	1.57652	-0.555024	-0.743588	-0.978689	0.0183403	-1.36747
50801	TC1300001558.mm.1	Hist1h2ak // Hist1h2ak // Hist1h2ak // Hist1h2ak // Hist1h2ak	0.650643	0.881882	-0.975229	0.270215	4.41786	1.62587	7	0	0	0	0.352887	0.689608	0.0507613	-0.97764	-1.34661	0.397506	0.0382996	-0.318228	-0.0231697	-0.245346	1.93803	1.79172	2.07353	-0.895521	-0.449719	0.0392492	-0.189672	-1.25239	-0.712545	-0.96075
5958	TC0200002135.mm.1	Gm11673	0.727833	0.823862	-0.900331	0.66139	3.30442	1.62816	4	0	0	0	1.89129	-0.26763	1.46069	-0.0109068	-0.299823	-0.725359	-0.633146	1.45306	-0.0469659	1.30812	0.328118	0.421211	-1.03055	0.196747	-0.939844	-1.36789	0.963879	-0.139872	-1.34149	-1.21963
6594	TC0200002778.mm.1	Lsm14b // Lsm14b // Lsm14b // Lsm14b // Lsm14b // Lsm14b // Lsm14b // Lsm14b // Lsm14b // Lsm14b // Lsm14b // Lsm14b	0.681885	0.72886	-0.947697	0.699559	3.33319	1.62958	4	0	0	0	-0.353427	0.907115	-0.116525	-0.482437	-0.457824	-0.0742812	-0.90517	0.301171	0.74082	0.8145	0.941781	1.83893	2.32008	-0.190834	-0.878298	-0.541033	-1.02148	-0.207999	-1.03644	-1.59865
50798	TC1300001555.mm.1	Hist1h2bl // Hist1h2bl // Hist1h2bl // Hist1h2bl	0.648852	0.942543	-0.985772	0.0841812	4.54633	1.63462	6	0	0	0	-0.331637	0.627279	0.11788	-1.00347	-1.1541	0.237436	0.103746	-0.424677	-0.0457873	0.257832	2.06398	1.85242	2.13996	-0.539029	-0.34837	-0.435534	-0.160603	-0.959144	-1.08005	-0.918126
33148	TC0900001302.mm.1	Topbp1 // Topbp1 // Topbp1 // Topbp1 // Topbp1 // Topbp1	0.528273	0.897568	-1.10673	0.147366	4.67469	1.635	6	0	0	0	0.161027	0.517455	-0.293125	-1.34321	-1.50736	-0.23811	-0.135282	-0.106329	-0.0207681	-0.224597	1.66191	1.89601	1.89561	0.754882	0.343442	0.13761	-0.178988	-1.2139	-0.938676	-1.1676
18274	TC0500001560.mm.1	Rfc2 // Rfc2 // Rfc2 // Rfc2 // Rfc2 // Rfc2	0.612808	1.22852	-1.02366	0.402739	3.15127	1.63646	7	0	0	0	-0.106752	0.230647	-0.019751	-0.819618	-0.938323	0.251817	-0.0780351	0.246135	-0.313075	0.108191	3.16263	1.22776	1.32966	-0.375218	-0.405098	-0.216039	-0.213963	-0.71559	-0.875995	-1.47938
49427	TC1300000177.mm.1	Hist1h2bn // Hist1h2bn // Hist1h2bn // Hist1h2bn	0.619042	1.00731	-1.01955	0.0960271	4.25895	1.6386	6	0	0	0	-0.0485519	0.218444	0.403867	-1.0332	-1.08156	0.492409	-0.0555303	-0.504301	-0.320494	-0.0193116	2.2108	1.88854	1.90399	-0.34632	0.269766	-0.699194	-0.220694	-0.917878	-1.1087	-1.03208
17083	TC0500000363.mm.1	Whsc1 // Whsc1 // Whsc1 // Whsc1 // Whsc1 // Whsc1 // Whsc1 // Whsc1 // Whsc1 // Whsc1 // Whsc1 // Whsc1 // Whsc1 // Whsc1 // Whsc1 // Whsc1 // Whsc1 // Whsc1 // Whsc1 // Whsc1 // Whsc1 // Whsc1 // Whsc1 // Whsc1 // Whsc1 // Whsc1 // Whsc1 // Whsc1 // Whsc1 // Whsc1 // Whsc1 // Whsc1 // Whsc1 // Whsc1	0.535933	0.956995	-1.10277	0.341828	3.97697	1.6387	7	0	0	0	-0.149129	1.44527	0.430438	-1.30334	-1.23439	0.0674743	-0.22892	0.0457718	-0.512448	-0.511706	1.3898	1.6593	1.98894	0.501516	-0.318983	0.121947	-0.0832375	-0.945304	-0.868053	-1.49495
48758	TC1200002150.mm.1	Cep128 // Cep128 // Cep128 // Cep128 // Cep128 // Cep128 // Cep128 // Cep128 // Cep128 // Cep128 // Cep128 // Cep128 // Cep128 // Cep128 // Cep128 // Cep128 // Cep128 // Cep128 // Cep128 // Cep128 // Cep128 // Cep128 // Cep128 // Cep128 // Cep128 // Cep128 // Cep128 // Cep128 // Cep128 // Cep128 // Cep128 // Cep128 // Cep128 // Cep128 // Cep128	0.519836	0.841432	-1.12224	0.437375	4.04361	1.64207	7	0	0	0	1.18145	1.07719	0.148306	-1.1261	-1.77215	0.247178	0.464337	0.752668	-0.531125	-0.440815	1.67491	0.528941	0.0525956	0.661852	0.785704	-1.24901	0.910782	-0.710073	-1.07556	-1.58108
35017	TC0900003185.mm.1	Stmn1-rs1 // Stmn1-rs1	0.816841	0.836236	-0.825287	0.267092	4.66939	1.64213	7	0	0	0	-0.30352	1.62923	0.560876	-1.47073	-0.552795	-0.467576	-0.406422	0.757262	0.0988607	0.629208	1.01099	2.09224	1.31424	-1.07122	0.217108	-1.21692	-0.344966	-1.05156	-0.893643	-0.53066
64352	TC1900000508.mm.1	Kif20b // Kif20b // Kif20b // Kif20b // Kif20b // Kif20b // Kif20b // Kif20b // Kif20b // Kif20b	0.560209	0.924557	-1.08336	0.0745162	4.66805	1.64357	6	0	0	0	-0.0961184	1.2012	-0.15571	-1.4138	-1.34791	0.247555	-0.0715738	0.371665	-0.228731	-0.178063	1.52086	1.85803	2.01496	-0.148142	-0.120849	-0.150379	-0.0529196	-1.04184	-1.03884	-1.16938
63893	TC1900000048.mm.1	Gm25334	0.485855	0.436199	-1.15788	0.432776	5.49094	1.64374	3	0	0	0	1.08449	0.729136	-0.0793302	-1.33692	0.451482	-1.21694	0.854104	-1.15423	0.17034	0.851016	0.0792686	0.566064	-0.0226468	-0.00946509	1.56893	-0.829491	1.76784	-0.68592	-1.53611	-1.25162
48371	TC1200001758.mm.1	Baz1a // Baz1a // Baz1a // Baz1a // Baz1a // Baz1a // Baz1a // Baz1a // Baz1a // Baz1a // Baz1a // Baz1a // Baz1a // Baz1a // Baz1a // Baz1a // Baz1a // Baz1a	0.626754	0.818805	-1.02188	0.373629	4.37024	1.64863	7	0	0	0	0.304805	0.931131	0.114753	-1.46088	-1.61512	-0.105992	0.386105	0.302925	0.24048	-0.500516	1.81728	1.47934	1.78787	0.0838086	-0.667056	-0.309747	0.276447	-0.622277	-1.36252	-1.08084
15504	TC0400002999.mm.1	---	0.545928	0.900234	-1.10341	0.17934	4.63739	1.64934	6	0	0	0	0.286469	-0.122529	-0.192215	1.2175	-0.317046	-0.646888	-1.45376	-0.378565	2.1144	-0.364499	1.10686	0.993006	-0.0835571	-0.732548	1.61718	-0.530831	0.797261	-0.903719	-1.25074	-1.15578
48118	TC1200001501.mm.1	---	0.909629	0.583052	-0.741089	0.333868	5.63807	1.65072	6	0	0	0	0.876196	0.859541	0.699067	-1.63707	-0.731921	-0.32341	-1.54367	-0.000719	1.51726	0.273169	0.307767	1.8344	-0.356932	1.65147	0.00989254	-0.658219	-0.553559	-0.388443	-1.05231	-0.782509
9882	TC0300000574.mm.1	Smc4 // Smc4 // Smc4 // Smc4 // Smc4 // Smc4 // Smc4 // Smc4 // Smc4 // Smc4 // Smc4 // Smc4 // Smc4 // Smc4 // Smc4 // Smc4 // Smc4 // Smc4 // Smc4 // Smc4 // Smc4 // Smc4 // Smc4 // Smc4 // Smc4 // Smc4	0.529354	1.07778	-1.12462	0.151601	3.96962	1.65397	6	0	0	0	-0.381826	0.927876	0.0538305	-0.982119	-1.11729	-0.115244	0.248712	-0.349483	-0.489269	-0.293603	2.078	1.81047	1.93464	-0.0898983	-0.11603	0.23129	0.023797	-1.20744	-0.949647	-1.21677
2989	TC0100003026.mm.1	Mcm6 // Mcm6 // Mcm6 // Mcm6 // Mcm6 // Mcm6 // Mcm6	0.60352	0.838305	-1.05244	0.131856	5.08172	1.65596	6	0	0	0	0.242217	1.08405	0.111735	-1.46506	-1.63856	0.266585	-0.00649356	-0.316392	-0.447287	-0.00885275	1.44542	1.79735	1.81564	0.451998	-0.486709	0.364798	-0.053104	-1.14783	-0.901978	-1.10752
51776	TC1300002542.mm.1	Cenph // Cenph // Cenph // Cenph // Cenph // Cenph // Cenph // Cenph	0.709566	0.88665	-0.946695	0.564328	3.54357	1.65626	6	0	0	0	0.626311	1.44436	0.42546	-1.72248	-1.46903	-0.175986	-0.304708	0.601522	-0.220233	-0.345335	2.15231	0.884082	0.383057	-0.499333	-0.0318897	-0.0979103	1.18988	-1.47037	-0.349019	-1.02069
10235	TC0300000934.mm.1	Hist2h3b // Hist2h3b // Hist2h3b // Hist2h3b // Hist2h3b // Hist2h3b // Hist2h3b	0.74961	0.929535	-0.908047	0.273033	4.30477	1.65766	7	0	0	0	2.32416	1.34606	-0.159763	-0.870885	-1.45354	0.524728	-0.466729	1.05203	0.98535	-0.363171	0.279406	0.835224	-0.305827	-0.0261296	-0.157103	-1.49004	0.670365	-1.22245	-0.73055	-0.771146
63912	TC1900000067.mm.1	Fosl1 // Fosl1 // Fosl1 // Fosl1 // Fosl1	0.84602	0.912942	-0.811923	0.709781	3.0948	1.65794	5	0	0	0	0.398332	0.607206	-0.129995	-0.608237	-1.3635	-1.55456	0.760255	0.075902	1.20739	1.4141	2.45125	-0.0261371	0.115386	-0.283614	-0.169263	-0.752157	0.293417	-0.391528	-0.412827	-1.63142
5835	TC0200002010.mm.1	Cdc25b // Cdc25b // Cdc25b // Cdc25b // Cdc25b // Cdc25b // Cdc25b // Cdc25b // Cdc25b // Cdc25b // Cdc25b // Cdc25b // Cdc25b // Cdc25b // Cdc25b // Cdc25b // Cdc25b // Cdc25b // Cdc25b // Cdc25b // Cdc25b	0.594493	0.836278	-1.06867	0.700058	3.24141	1.66316	4	0	0	0	0.869478	0.464929	0.383582	-0.739049	-0.356548	-0.837949	0.531774	0.0937151	0.514706	-0.723629	0.537301	2.11508	2.24083	-0.796742	-0.423849	-0.0192716	-0.648366	-1.10911	-0.349263	-1.74763
21735	TC0600001318.mm.1	Gm6253	0.467063	0.6758	-1.19701	0.681184	3.54851	1.66407	3	0	0	0	1.57413	0.458383	-0.495745	0.864686	-1.42435	-1.65841	0.0668901	-0.215413	0.393495	0.913928	-0.143033	0.568285	0.326541	-0.694641	1.18759	0.631798	1.23689	-1.75334	-0.4373	-1.40039
37394	TC0X00002225.mm.1	Mir18b // Mir18b // Mir18b	0.420298	0.520117	-1.24485	0.37669	5.67994	1.66515	5	0	0	0	0.365227	0.654805	0.125147	-0.241082	0.804925	0.614417	-0.812496	-2.05616	0.78421	0.225599	-0.414604	1.2017	-1.02106	0.988322	0.555696	1.68256	0.277341	-1.67813	-0.995046	-1.06138
29474	TC0800000846.mm.1	Mcm5 // Mcm5 // Mcm5 // Mcm5 // Mcm5	0.575946	1.02309	-1.09263	0.209296	4.1186	1.66857	7	0	0	0	0.322237	0.817604	-0.473281	-1.56822	-1.37671	-0.0126477	0.253868	-0.0272676	0.513943	-0.80184	1.71071	1.94225	1.40731	0.29013	-0.0716974	0.473236	-0.121742	-0.850962	-1.21517	-1.21175
8403	TC0200004598.mm.1	Ckap2l // Ckap2l // Ckap2l // Ckap2l // Ckap2l // Ckap2l // Ckap2l	0.522856	0.592413	-1.14663	0.2303	6.41087	1.66948	7	0	0	0	0.651563	0.428185	0.229924	-1.33094	-1.48538	-0.237759	0.347963	-0.00781467	0.165516	-0.347109	1.31819	1.21372	2.49195	-0.0309714	0.30739	-0.601977	0.327431	-0.960924	-1.07464	-1.40433
39170	TC1000000015.mm.1	Mthfd1l // Mthfd1l // Mthfd1l // Mthfd1l // Mthfd1l // Mthfd1l // Mthfd1l // Mthfd1l // Mthfd1l // Mthfd1l // Mthfd1l // Mthfd1l // Mthfd1l // Mthfd1l // Mthfd1l // Mthfd1l // Mthfd1l // Mthfd1l	0.580269	1.27544	-1.08948	0.0874818	3.44485	1.66975	6	0	0	0	-0.163061	-0.119722	-0.0318628	-0.294595	-0.936856	-0.187957	0.0430284	0.158915	-0.335707	0.0831721	3.1025	1.52657	1.27497	-0.773783	-0.131532	-0.107629	0.161992	-1.14185	-0.988488	-1.1381
46026	TC1100003693.mm.1	Top2a // Top2a // Top2a // Top2a // Top2a // Top2a // Top2a // Top2a // Top2a // Top2a // Top2a // Top2a // Top2a // Top2a // Top2a // Top2a // Top2a // Top2a	0.643051	0.919654	-1.03037	0.0535637	4.79533	1.67342	6	0	0	0	-0.163808	1.09059	0.00608585	-1.40895	-1.32327	-0.219782	0.0764217	-0.314639	-0.0724309	-0.0235451	1.96062	1.70385	1.95954	-0.289998	-0.0856645	0.109344	0.0867596	-1.02544	-0.97945	-1.08624
6055	TC0200002232.mm.1	Gins1 // Gins1 // Gins1 // Gins1 // Gins1 // Gins1 // Gins1 // Gins1 // Gins1 // Gins1 // Gins1 // Gins1 // Gins1 // Gins1 // Gins1	0.553313	0.486199	-1.12016	0.546304	4.58439	1.67348	3	0	0	0	0.754807	0.850721	0.892674	-0.900451	-1.71047	-0.140462	-0.0682599	1.39355	0.0376864	-0.176819	1.13925	0.374875	1.1544	0.218278	-0.305418	-1.4714	1.31754	-0.520641	-1.24999	-1.58986
50412	TC1300001169.mm.1	Sgtb // Sgtb // Sgtb // Sgtb // Sgtb // Sgtb // Sgtb // Sgtb // Sgtb // Sgtb	0.755182	0.948872	-0.919107	0.140365	4.55363	1.67429	6	0	0	0	2.13699	-0.743189	1.58011	-1.20743	0.560449	-1.46295	1.30933	-0.173989	0.764653	1.01236	0.154552	0.380803	-0.529754	-0.0541433	-0.883338	-0.435753	0.348624	-0.989249	-1.01058	-0.757496
12608	TC0400000085.mm.1	Ccne2 // Ccne2 // Ccne2 // Ccne2 // Ccne2 // Ccne2 // Ccne2 // Ccne2 // Ccne2 // Ccne2 // Ccne2 // Ccne2 // Ccne2 // Ccne2 // Ccne2 // Ccne2 // Ccne2 // Ccne2 // Ccne2 // Ccne2 // Ccne2 // Ccne2	0.612572	0.681817	-1.0623	0.164411	6.09868	1.67488	7	0	0	0	0.361049	0.640901	-0.133344	-1.50503	-1.47923	-0.112674	-0.23577	0.384942	0.542548	-0.134798	1.4368	1.57485	2.20675	0.0182651	-0.172847	-0.628936	0.423431	-0.979344	-1.25167	-0.9559
1915	TC0100001937.mm.1	Gm15452	0.786277	0.947896	-0.893676	0.316554	4.17697	1.67995	7	0	0	0	0.0829619	1.51984	0.0761419	-1.48889	-1.5612	-0.352686	0.170343	0.0831738	-0.213809	0.218727	1.85522	1.96486	1.04678	0.260102	0.180799	-0.575542	-0.5858	-1.22547	-0.594959	-0.860599
43159	TC1100000805.mm.1	Snord49a // Snord49a // Snord49a	0.774637	0.806463	-0.905756	0.299714	4.79419	1.68039	7	0	0	0	0.62535	2.05697	-0.038582	-0.984019	-1.26542	-1.07633	0.913007	-0.110481	0.781346	0.0890433	0.23314	1.67519	0.27425	1.23577	0.164893	-1.33406	-0.522811	-0.562046	-1.11263	-1.0426
19827	TC0500003133.mm.1	Gm25343	0.767248	1.07237	-0.918556	0.736535	2.86964	1.6858	5	0	0	0	1.26831	1.11589	0.0875742	-1.25604	-0.253131	0.542057	-0.402571	-1.32139	-0.864293	2.58319	0.443512	0.736551	-0.207891	0.036817	0.501947	-0.436106	0.181235	-0.0876162	-1.49099	-1.17706
37720	TC0X00002556.mm.1	Gk // Gk // Gk // Gk // Gk // Gk // Gk // Gk // Gk // Gk // Gk // Gk // Gk // Gk // Gk // Gk // Gk // Gk // Gk	0.626596	0.734684	-1.06069	0.318249	5.06738	1.68729	7	0	0	0	0.128321	0.221523	0.666248	-1.32404	-0.561659	0.304112	0.0667645	-0.236561	-0.159644	0.263073	1.47953	1.78712	2.39242	-0.859079	-0.768207	-0.371895	0.154051	-0.708981	-1.32878	-1.14432
51305	TC1300002063.mm.1	Ddx41 // Ddx41 // Ddx41 // Ddx41 // Ddx41	0.508976	1.07254	-1.17956	0.384786	3.65276	1.68854	7	0	0	0	-0.111212	1.39941	-0.455266	-0.621654	-0.909913	-0.181051	0.325714	1.28493	-0.301142	-0.477361	1.93371	1.5747	-0.147404	0.898302	-1.32863	0.303249	0.352321	-1.02851	-0.893225	-1.61696
36150	TC0X00000958.mm.1	Kif4 // Kif4 // Kif4 // Kif4 // Kif4 // Kif4 // Kif4 // Kif4 // Kif4 // Kif4 // Kif4	0.644111	0.828222	-1.04522	0.233048	4.95799	1.68934	7	0	0	0	0.20918	1.27474	-0.0499641	-1.70269	-1.39354	-0.33315	-0.546059	-0.102693	-0.235988	0.0724645	1.76794	1.4704	1.55749	-0.232191	0.53003	0.750121	0.0995688	-1.1067	-0.7876	-1.24137
13849	TC0400001336.mm.1	Gm12957	0.723768	0.605255	-0.965722	0.564767	4.2416	1.68949	4	0	0	0	0.771055	-0.0362711	0.286172	-0.960174	-1.23094	-0.43935	1.03117	-0.462933	0.705173	0.32443	1.64401	1.37181	1.73471	-0.620222	-1.50386	-0.0780752	0.360465	-0.464378	-1.57758	-0.855212
5585	TC0200001757.mm.1	Casc5 // Casc5 // Casc5 // Casc5 // Casc5 // Casc5 // Casc5 // Casc5 // Casc5 // Casc5 // Casc5 // Casc5 // Casc5 // Casc5	0.633298	0.795527	-1.05691	0.0595079	5.58493	1.69021	6	0	0	0	0.415931	0.94678	0.194656	-1.59449	-1.44558	-0.359242	0.0610872	0.270007	-0.122707	-0.270484	1.45245	1.81646	2.04393	-0.118233	-0.0573878	-0.0662282	0.00377848	-1.03885	-1.00852	-1.12336
62343	TC1800000239.mm.1	B930094E09Rik	0.858066	0.708872	-0.832154	0.598258	3.86656	1.69022	4	0	0	0	0.280342	0.322723	0.974251	-0.0394432	0.695957	0.340576	-0.621534	-2.0565	2.28259	0.411096	0.592124	1.14334	-1.31826	0.263531	0.050567	0.166505	-0.9914	-0.769301	-0.267805	-1.45936
64404	TC1900000560.mm.1	Hells // Hells // Hells // Hells // Hells // Hells // Hells // Hells // Hells // Hells // Hells // Hells // Hells // Hells // Hells // Hells	0.624973	0.868352	-1.06766	0.209991	4.8377	1.69263	7	0	0	0	0.433495	0.798399	-0.492822	-1.52854	-1.49668	0.0345431	-0.611285	-0.104035	-0.0974528	0.254229	1.91891	1.56005	1.76314	0.156696	0.29613	0.152708	0.165473	-1.07839	-0.852504	-1.27207
53594	TC1400001615.mm.1	---	0.567222	0.98829	-1.12589	0.276442	4.1681	1.69312	7	0	0	0	0.442305	0.560946	1.44241	0.0243901	-0.274602	0.229283	-1.80284	0.269618	-0.539816	2.20367	-0.496353	0.357392	-0.777614	0.523719	-0.377698	0.0250696	1.5678	-1.09749	-1.41544	-0.864748
33493	TC0900001652.mm.1	Kif15 // Kif15 // Kif15 // Kif15 // Kif15 // Kif15 // Kif15 // Kif15 // Kif15	0.72776	0.788778	-0.965478	0.0781548	5.61557	1.69324	6	0	0	0	-0.0279675	1.22054	0.428645	-1.36394	-1.49339	0.348004	-0.348583	0.0281888	-0.0861666	0.177911	1.76263	1.61873	1.90381	-0.447261	0.0209778	-0.765168	-0.0805323	-0.943088	-0.900961	-1.05238
15845	TC0400003343.mm.1	Nasp // Nasp // Nasp // Nasp // Nasp // Nasp // Nasp // Nasp // Nasp // Nasp // Nasp // Nasp // Nasp // Nasp // Nasp // Nasp // Nasp // Nasp // Nasp // Nasp // Nasp // Nasp // Nasp // Nasp // Nasp	0.724559	0.721512	-0.975046	0.15649	5.91613	1.6996	7	0	0	0	0.657054	1.10328	0.0859442	-1.39695	-1.29559	-0.780172	0.0380889	0.251342	0.310142	-0.122937	1.06385	1.97458	1.89402	-0.523843	0.531149	-0.922002	0.05718	-0.802751	-1.01402	-1.10836
16016	TC0400003516.mm.1	Cdca8 // Cdca8 // Cdca8 // Cdca8 // Cdca8 // Cdca8 // Cdca8 // Cdca8 // Cdca8 // Cdca8 // Cdca8 // Cdca8 // Cdca8 // Cdca8 // Cdca8 // Cdca8 // Cdca8	0.768884	0.741651	-0.932327	0.282936	5.2435	1.70121	7	0	0	0	1.85379	1.09354	0.423625	-1.67132	-1.69465	0.190852	-0.0301058	-0.0255448	-0.45201	0.312141	1.00016	1.15095	1.41773	-0.830769	0.199852	-0.483218	0.341968	-0.647897	-0.935339	-1.21375
20142	TC0500003449.mm.1	Mospd3 // Mospd3 // Mospd3 // Mospd3 // Mospd3 // Mospd3 // Mospd3 // Mospd3 // Mospd3 // Mospd3 // Mospd3 // Mospd3 // Mospd3 // Mospd3 // Mospd3 // Mospd3 // Mospd3 // Mospd3	0.904725	1.11001	-0.798429	0.453509	3.44389	1.70315	7	0	0	0	-0.017134	0.267233	0.189215	-0.658457	-0.547552	-0.402607	-0.558002	-0.259733	2.11307	0.272375	2.83154	0.676777	-1.2283	0.610041	-0.550683	-0.306754	-0.0357355	-0.293222	-1.17038	-0.931679
10659	TC0300001364.mm.1	Cenpe // Cenpe // Cenpe // Cenpe	0.665622	0.91034	-1.04286	0.398578	4.12741	1.70848	7	0	0	0	0.0193268	1.42749	0.315045	-1.51946	-1.3266	-0.151916	-0.0603962	0.479598	-0.29665	-0.157284	1.99787	1.35356	1.63239	-0.434167	0.0994819	-0.376106	0.126412	-1.21018	-0.587899	-1.33051
53911	TC1400001935.mm.1	Dlgap5 // Dlgap5 // Dlgap5 // Dlgap5 // Dlgap5 // Dlgap5 // Dlgap5 // Dlgap5 // Dlgap5 // Dlgap5 // Dlgap5 // Dlgap5 // Dlgap5 // Dlgap5 // Dlgap5 // Dlgap5 // Dlgap5 // Dlgap5 // Dlgap5 // Dlgap5 // Dlgap5 // Dlgap5 // Dlgap5 // Dlgap5	0.721815	0.719523	-0.988048	0.250629	5.55053	1.70986	7	0	0	0	0.580546	1.42448	0.100557	-1.73887	-1.44305	-0.376424	-0.385469	0.507868	-0.049632	0.0687005	1.66796	1.26009	1.4674	-0.353244	0.82477	-0.745633	0.154095	-1.03343	-0.717828	-1.21289
53135	TC1400001152.mm.1	Bora // Bora // Bora // Bora // Bora // Bora	0.803843	0.832268	-0.906385	0.312533	4.71598	1.71023	7	0	0	0	0.469538	1.5628	0.521765	-1.44501	-1.51796	-0.0693504	-1.4835	0.339613	-0.479439	0.278504	1.43936	1.83438	0.902388	0.122236	0.276911	0.127021	-0.160095	-0.92348	-0.585655	-1.21002
37794	TC0X00002631.mm.1	Pola1 // Pola1 // Pola1 // Pola1 // Pola1 // Pola1 // Pola1 // Pola1 // Pola1 // Pola1 // Pola1 // Pola1 // Pola1 // Pola1 // Pola1	0.620488	0.852245	-1.09402	0.184218	5.05422	1.71451	7	0	0	0	0.792895	1.42071	-0.116106	-1.04821	-1.09848	-0.0457184	0.220472	0.0425903	0.265986	-0.526786	0.581675	1.92505	2.27615	-0.749878	-0.19133	-0.378049	-0.0889049	-1.1118	-0.901555	-1.2687
16717	TC0400004222.mm.1	Rcc1 // Rcc1 // Rcc1 // Rcc1 // Rcc1 // Rcc1 // Rcc1 // Rcc1 // Rcc1 // Rcc1 // Rcc1 // Rcc1 // Rcc1 // Rcc1 // Rcc1 // Rcc1 // Rcc1 // Rcc1 // Rcc1 // Rcc1 // Rcc1	0.879165	0.768322	-0.835975	0.620447	3.71936	1.71514	4	0	0	0	0.571159	2.44862	0.68721	-0.591205	-1.20179	-1.40711	-0.00279453	1.05237	0.88572	0.250542	0.180209	1.1307	0.299721	-0.0181609	-1.4507	-0.324204	-0.00235955	-0.442547	-0.514168	-1.55121
6300	TC0200002478.mm.1	Mybl2 // Mybl2 // Mybl2 // Mybl2 // Mybl2 // Mybl2 // Mybl2 // Mybl2 // Mybl2 // Mybl2 // Mybl2 // Mybl2 // Mybl2 // Mybl2	0.720136	0.662959	-0.996127	0.126456	6.57585	1.71626	6	0	0	0	1.6935	0.617124	-0.239487	-1.77129	-1.36513	-1.39497	-0.210083	0.713141	0.951441	0.0607725	0.717946	1.23966	1.2957	0.12273	-0.0148804	-0.141948	0.714152	-0.867509	-1.00057	-1.1203
7047	TC0200003233.mm.1	Gtf3c5 // Gtf3c5 // Gtf3c5 // Gtf3c5 // Gtf3c5 // Gtf3c5 // Gtf3c5 // Gtf3c5 // Gtf3c5 // Gtf3c5 // Gtf3c5 // Gtf3c5 // Gtf3c5 // Gtf3c5 // Gtf3c5 // Gtf3c5 // Gtf3c5 // Gtf3c5 // Gtf3c5 // Gtf3c5	0.669035	0.946615	-1.05038	0.426327	3.95925	1.71941	7	0	0	0	0.308343	1.23499	-0.757826	-0.430408	-0.281177	-0.337245	-0.886409	0.806184	-0.00488912	0.48258	2.05199	1.36806	0.312398	-1.89662	0.644403	0.880387	-0.343629	-0.69017	-1.52107	-0.93989
20423	TC0500003737.mm.1	Gnb2 // Mir6418 // Gnb2 // Gnb2 // Gnb2 // Gnb2 // Gnb2 // Gnb2 // Gnb2 // Gnb2 // Gnb2 // Gnb2 // Gnb2 // Gnb2 // Gnb2 // Gnb2 // Gnb2 // Gnb2 // Gnb2 // Gnb2 // Gnb2 // Gnb2 // Gnb2 // Gnb2 // Gnb2 // Gnb2 // Gnb2 // Gnb2 // Gnb2 // Gnb2 // Gnb2 // Gnb2 // Gnb2 // Gnb2 // Gnb2 // Gnb2 // Gnb2	0.760275	0.994123	-0.961178	0.199724	4.37985	1.72145	6	0	0	0	-0.609264	1.15855	0.29557	-0.33288	-1.30163	-0.668095	-1.16057	0.0375128	0.850875	-0.221083	1.94976	1.89752	1.4082	0.13081	-0.0793145	-0.713217	0.240797	-0.869329	-1.1903	-0.823901
45667	TC1100003331.mm.1	---	0.520985	0.849548	-1.20469	1.22451	2.22245	1.72567	2	0	0	0	0.48825	2.2584	0.279275	-0.897281	0.197291	-0.085874	0.80243	-0.689138	-0.5482	0.585324	0.287565	0.296281	-0.247781	-0.285715	-0.986002	1.09414	1.06509	0.135353	-1.48402	-2.26539
51777	TC1300002543.mm.1	Ccnb1 // Ccnb1 // Ccnb1 // Ccnb1 // Ccnb1 // Ccnb1 // Ccnb1 // Ccnb1 // Ccnb1 // Ccnb1 // Ccnb1 // Ccnb1 // Ccnb1 // Ccnb1 // Ccnb1 // Ccnb1 // Ccnb1 // Ccnb1 // Ccnb1 // Ccnb1 // Ccnb1	0.673748	0.893345	-1.052	0.384389	4.27105	1.72574	7	0	0	0	0.704296	0.75826	-0.438623	-1.29709	-1.78847	0.0647723	0.521243	0.277623	-0.509742	0.882044	1.93706	1.38294	1.29254	0.0509462	-0.50423	-0.436044	0.258456	-1.2123	-0.6134	-1.33029
48472	TC1200001861.mm.1	Pole2 // Pole2 // Pole2 // Pole2 // Pole2 // Pole2 // Pole2	0.646211	1.05182	-1.0844	0.478369	3.57513	1.73061	7	0	0	0	0.16392	0.805935	-0.345082	-1.26407	-0.873829	0.24808	-0.138529	0.544513	-0.118074	-0.101606	2.42026	1.69813	1.37347	-0.237756	-0.392063	0.223659	-0.753747	-0.715884	-0.912318	-1.62501
2011	TC0100002033.mm.1	Mcm3 // Mcm3 // Mcm3 // Mcm3 // Mcm3	0.590517	0.734674	-1.14026	0.262969	5.4689	1.73078	7	0	0	0	0.193959	0.904908	0.179799	-1.34173	-1.39264	-0.70495	0.128021	-0.0144417	0.0236724	-0.24364	1.57716	1.49777	2.21363	0.288725	0.145187	-0.125002	0.0903617	-0.951541	-1.02861	-1.44064
15538	TC0400003033.mm.1	Cdkn2a // Cdkn2a // Cdkn2a // Cdkn2a // Cdkn2a // Cdkn2a // Cdkn2a // Cdkn2a // Cdkn2a // Cdkn2a // Cdkn2a	0.776638	0.487919	-0.957532	0.183148	8.15772	1.73417	7	0	0	0	1.36676	1.41977	0.326305	-1.54807	-1.88122	-0.672358	-0.791953	0.165339	0.25409	1.00796	0.620994	0.440584	1.04086	0.963601	-0.419402	-0.463349	1.04268	-0.86511	-0.83901	-1.16848
19742	TC0500003047.mm.1	Sart3 // Sart3 // Sart3 // Sart3 // Sart3 // Sart3	0.5465	0.736627	-1.19224	0.213097	5.71221	1.73874	7	0	0	0	0.652269	1.33714	-0.467257	-0.815993	-1.7866	0.258193	0.701951	-1.38278	0.689504	-0.348267	0.53778	1.42433	-0.0715878	1.26853	1.11685	0.214664	0.247994	-1.24334	-0.958243	-1.37514
23097	TC0600002690.mm.1	Mcm2 // Mcm2 // Mcm2 // Mcm2 // Mcm2	0.611458	0.665565	-1.13079	0.0356096	6.90274	1.74224	6	0	0	0	0.253541	0.693559	0.264128	-1.63521	-1.35547	-0.199649	-0.137824	-0.423447	-0.089831	0.113386	1.49333	1.5521	2.20784	0.173914	-0.1571	0.278781	0.360307	-1.10649	-1.17166	-1.11421
60791	TC1700001488.mm.1	Phf10 // Phf10 // Phf10 // Phf10 // Phf10 // Phf10 // Phf10 // Phf10 // Phf10 // Phf10 // Phf10 // Phf10 // Phf10 // Phf10 // Phf10 // Phf10	0.576762	0.611532	-1.1668	0.526103	4.56801	1.74356	4	0	0	0	-0.196545	0.797183	0.285131	-0.371507	-1.13469	-0.874732	0.609204	0.752333	-0.0310495	0.563934	1.12327	1.49541	1.45929	1.17564	-0.837613	-1.54745	0.232567	-0.559383	-1.47905	-1.46195
55559	TC1500000732.mm.1	---	1.00407	0.821834	-0.741141	0.756381	3.25658	1.74521	4	0	0	0	2.18627	0.396919	1.02197	-1.29136	-0.32267	-0.123045	0.183522	-0.689194	0.542178	2.12098	0.227781	0.532402	-0.162871	-0.352412	-1.54389	0.0147748	-0.517938	-0.394685	-0.220042	-1.60869
45714	TC1100003379.mm.1	Slfn9 // Slfn9 // Slfn9 // Slfn9 // Slfn9 // Slfn9 // Slfn9 // Slfn9 // Slfn9 // Slfn9	0.642567	0.932955	-1.10341	0.183118	4.74282	1.74598	6	0	0	0	0.688265	1.0467	0.00205968	-1.41526	-1.46965	0.405768	-0.259427	0.387393	-0.472467	-0.213057	2.13292	1.31355	1.37453	-0.332086	0.104851	-0.545141	0.561294	-0.918056	-1.10798	-1.28421
6178	TC0200002355.mm.1	---	0.600379	1.07053	-1.14785	0.262886	4.04541	1.74823	7	0	0	0	2.42756	0.850806	0.934027	-0.670186	-0.503904	0.0480508	0.400778	0.142792	0.366383	-0.592459	-0.728905	0.94524	-0.174708	0.93187	-1.65714	-0.236954	0.960297	-0.954178	-1.04226	-1.44712
33689	TC0900001851.mm.1	Dnmt1 // Dnmt1 // Dnmt1 // Dnmt1 // Dnmt1 // Dnmt1 // Dnmt1 // Dnmt1 // Dnmt1 // Dnmt1 // Dnmt1 // Dnmt1 // Dnmt1 // Dnmt1 // Dnmt1 // Dnmt1 // Dnmt1 // Dnmt1 // Dnmt1	0.682407	0.909083	-1.0702	0.0966746	5.03472	1.75261	6	0	0	0	0.255261	0.902382	-0.0875527	-1.1449	-1.38747	-0.311819	-0.0437836	-0.132424	-0.24846	0.190321	2.15268	1.61222	1.923	-0.399131	0.0223366	-0.283156	0.191106	-1.05485	-0.982127	-1.17364
47884	TC1200001264.mm.1	---	0.848294	0.928554	-0.905565	0.148256	4.85501	1.75386	6	0	0	0	2.19768	0.330664	2.03418	0.503584	-1.00711	-0.810031	-0.924773	-0.709956	-0.0463803	0.259031	0.140947	1.02194	-1.08738	0.13701	0.905031	-0.805235	0.577492	-0.964906	-0.736831	-1.01496
17856	TC0500001139.mm.1	Pole // Pole // Pole // Pole // Pole // Pole // Pole // Pole // Pole // Pole // Pole // Pole // Pole // Pole // Pole // Pole // Pole // Pole // Pole // Pole // Pole // Pole // Pole	0.652305	0.939719	-1.10178	0.300073	4.4387	1.75409	7	0	0	0	0.0741538	0.815684	-0.201736	-1.59058	-1.32327	0.106756	-0.201114	-0.141263	0.610651	-0.43605	2.12066	1.58277	1.57079	0.163346	0.111533	-0.121715	0.164723	-1.14041	-0.784263	-1.38067
51544	TC1300002306.mm.1	Trip13 // Trip13 // Trip13 // Trip13 // Trip13 // Trip13	0.673423	1.0846	-1.08256	0.375162	3.78736	1.75599	7	0	0	0	-0.422313	2.02289	-0.339096	-1.32322	-0.93314	-0.554427	-0.675943	0.482868	0.584369	-0.216462	2.13455	0.95002	0.814002	-0.290328	-0.0138015	0.319237	0.708485	-0.69819	-1.10172	-1.44778
46305	TC1100003973.mm.1	---	0.950723	0.839837	-0.809938	0.485016	4.15947	1.76066	6	0	0	0	0.405963	-0.241854	1.55907	-0.717998	-0.250651	-0.725035	-0.901386	0.928469	0.600106	0.977413	2.37135	0.983016	-1.06197	-0.0336974	-1.10662	-0.813327	0.456972	-0.984692	-1.18336	-0.261761
2114	TC0100002136.mm.1	Prim2 // Prim2 // Prim2 // Prim2 // Prim2 // Prim2	0.677321	0.995817	-1.08617	0.256626	4.35973	1.76349	7	0	0	0	-0.312441	0.548475	0.022433	-1.12497	-1.14984	-0.0795178	-0.366824	0.294693	-0.0453417	0.469629	2.41913	1.63936	1.6574	0.343927	-0.30658	-0.611131	-0.139893	-0.914795	-0.962505	-1.38121
14573	TC0400002063.mm.1	Pank4 // Pank4 // Pank4 // Pank4 // Pank4 // Pank4 // Pank4 // Pank4 // Pank4 // Pank4 // Pank4 // Pank4 // Pank4 // Pank4 // Pank4 // Pank4 // Pank4 // Pank4	0.8079	1.09083	-0.965111	0.313684	3.93726	1.77301	7	0	0	0	0.609189	2.93963	0.365005	-0.251063	-0.85669	0.297476	-1.63588	0.23504	0.524428	-0.333999	0.0779897	1.47306	0.289535	-0.707581	-0.280547	0.143273	0.00646838	-1.15777	-0.603151	-1.13441
7508	TC0200003697.mm.1	Spc25 // Spc25 // Spc25 // Spc25 // Spc25 // Spc25 // Spc25 // Spc25 // Spc25 // Spc25 // Spc25 // Spc25 // Spc25 // Spc25 // Spc25 // Spc25 // Spc25 // Spc25 // Spc25 // Spc25 // Spc25 // Spc25 // Spc25 // Spc25 // Spc25	0.775884	0.607205	-0.99735	0.494165	4.84283	1.77323	4	0	0	0	1.17013	1.04257	0.558519	-1.666	-0.898868	-1.14094	-0.599491	1.01925	0.84248	-0.383688	0.66557	1.5356	1.01523	0.182911	-1.05095	0.799502	-0.0997889	-0.978908	-0.512665	-1.50048
17080	TC0500000360.mm.1	Tacc3 // Tacc3 // Tacc3 // Tacc3 // Tacc3 // Tacc3 // Tacc3 // Tacc3 // Tacc3 // Tacc3 // Tacc3 // Tacc3 // Tacc3 // Tacc3 // Tacc3 // Tacc3 // Tacc3 // Tacc3 // Tacc3 // Tacc3 // Tacc3 // Tacc3 // Tacc3	0.622474	0.774039	-1.15596	0.372516	4.89781	1.77843	7	0	0	0	-0.0171428	1.68924	0.389356	-1.41454	-1.34769	-0.527906	-0.157516	-0.235688	0.105585	-0.230201	0.817678	1.6028	1.97757	0.45752	0.151464	-0.0777082	0.28506	-0.870393	-1.02016	-1.57732
60618	TC1700001315.mm.1	Msh6 // Msh6 // Msh6 // Msh6 // Msh6 // Msh6	0.721482	0.752372	-1.05865	0.635302	3.83555	1.78014	4	0	0	0	-0.0209114	1.32201	-0.379025	-1.12174	-1.07269	-1.08152	0.31133	0.206487	0.682608	0.771625	0.831247	1.84283	1.8613	0.156718	-0.686082	-0.146484	-0.301742	-0.411053	-1.6809	-1.08401
47201	TC1200000577.mm.1	---	0.606815	0.862024	-1.17363	0.525828	3.99802	1.78044	6	0	0	0	0.240291	0.667209	2.40006	0.458162	0.221801	-0.671202	-0.0340927	-0.146794	0.6301	0.386594	-0.372555	0.29601	-0.83246	0.658902	-0.195924	-1.73025	1.54503	-0.627585	-1.21671	-1.67659
15891	TC0400003390.mm.1	Cdc20 // Cdc20 // Cdc20 // Cdc20 // Cdc20 // Cdc20 // Cdc20 // Cdc20 // Cdc20 // Cdc20 // Cdc20	0.7712	0.819624	-1.00986	0.214171	5.33965	1.78106	7	0	0	0	-0.122341	1.98082	0.937119	-1.56742	-1.44211	-0.456556	-0.234805	-0.723086	-0.392489	0.63154	1.0582	1.30556	1.4407	0.331455	0.131945	-0.166979	0.318053	-0.953438	-0.829556	-1.2466
17252	TC0500000532.mm.1	Pi4k2b // Pi4k2b // Pi4k2b // Pi4k2b // Pi4k2b // Pi4k2b // Pi4k2b // Pi4k2b // Pi4k2b // Pi4k2b // Pi4k2b // Pi4k2b // Pi4k2b // Pi4k2b // Pi4k2b	0.830782	0.929589	-0.950292	0.680904	3.37805	1.78107	5	0	0	0	0.602871	1.40053	2.57762	-0.619329	-0.33739	-1.90964	-0.821783	-0.126681	-0.191706	0.445758	0.0833283	0.89707	0.0783284	0.522373	0.205445	0.33001	-0.285929	-0.459722	-0.663473	-1.72768
55388	TC1500000558.mm.1	Zfp41 // Zfp41 // Zfp41 // Zfp41 // Zfp41 // Zfp41 // Zfp41 // Zfp41 // Zfp41 // Zfp41 // Zfp41 // Zfp41 // Zfp41 // Zfp41 // Zfp41	0.65841	1.08142	-1.12965	0.768788	2.96336	1.78806	5	0	0	0	0.259823	0.860557	-0.852716	-0.223803	-0.617603	-0.378455	-0.986501	-0.595219	2.73091	0.303693	0.416213	0.890391	1.20826	-0.476722	0.189949	0.547959	0.112209	-0.247548	-1.48434	-1.65706
55349	TC1500000519.mm.1	---	0.73246	0.670704	-1.05802	0.471158	4.81527	1.79048	5	0	0	0	0.752131	0.791207	0.124023	-0.845919	-0.128493	1.37347	-0.636168	-0.286271	1.81902	-0.285916	0.981699	0.945054	-0.997597	0.766632	-1.79051	-0.284774	0.876458	-0.526774	-1.42525	-1.22202
10633	TC0300001338.mm.1	Papss1 // Papss1 // Papss1 // Papss1 // Papss1 // Papss1 // Papss1 // Papss1 // Papss1 // Papss1 // Papss1	0.749654	1.0835	-1.04765	0.450055	3.70576	1.7973	7	0	0	0	-0.023049	0.2638	0.827355	0.242833	-0.876777	-1.10088	0.05688	-0.550207	0.481883	-0.588909	2.62129	1.6652	0.382331	-0.0155822	1.01815	-0.642242	-0.619132	-0.589958	-1.06333	-1.48966
63944	TC1900000099.mm.1	Cdca5 // Cdca5 // Cdca5 // Cdca5 // Cdca5 // Cdca5 // Cdca5 // Cdca5 // Cdca5 // Cdca5 // Cdca5	0.744621	0.546566	-1.05285	0.175406	7.81271	1.79747	7	0	0	0	-0.21291	1.4158	0.538812	-0.975847	-1.34131	1.8366	-1.10387	-0.456202	0.536277	0.721271	1.30246	0.910634	0.872277	0.113958	-1.01726	-0.529314	0.54716	-0.936772	-0.967141	-1.25463
64091	TC1900000247.mm.1	Fam111a // Fam111a // Fam111a // Fam111a // Fam111a // Fam111a // Fam111a // Fam111a // Fam111a // Fam111a // Fam111a // Fam111a	0.53952	0.924743	-1.25981	0.196404	4.89674	1.79933	7	0	0	0	1.24118	0.704382	-0.802524	-1.04825	-1.26592	0.648403	-0.432779	0.303206	0.438638	-0.464663	0.808936	1.85069	1.65999	-0.0480123	-0.0252688	-0.531134	0.742558	-1.06482	-1.25699	-1.4576
36819	TC0X00001637.mm.1	Scml2 // Scml2 // Scml2 // Scml2 // Scml2 // Scml2 // Scml2 // Scml2 // Scml2 // Scml2 // Scml2 // Scml2 // Scml2 // Scml2 // Scml2 // Scml2 // Scml2 // Scml2 // Scml2	0.959873	0.913687	-0.850087	0.397984	4.36347	1.80996	7	0	0	0	-0.0633836	2.02278	-0.00218353	-0.566904	-0.242641	0.102049	0.0770287	-0.376277	0.347984	0.885365	2.10522	1.42333	-0.239031	-1.88687	-0.842602	-0.390512	0.196909	-1.30942	-0.632663	-0.608177
19453	TC0500002756.mm.1	Cxcl10 // Cxcl10 // Cxcl10 // Cxcl10 // Cxcl10 // Cxcl10 // Cxcl10 // Cxcl10 // Cxcl10 // Cxcl10	0.765299	0.891825	-1.05354	0.457002	4.24899	1.81884	7	0	0	0	0.13283	0.899592	0.69448	-1.29076	-1.18612	-0.271571	-0.956711	-0.854751	0.232658	0.235834	2.68872	0.47298	0.350864	0.0244297	0.625991	0.412121	0.950034	-0.526013	-1.30559	-1.32902
39842	TC1000000691.mm.1	Gm9923	0.696362	0.918771	-1.12458	0.630731	3.61882	1.82095	5	0	0	0	0.606208	-0.111574	-0.733131	0.271166	1.76508	-0.448773	-0.69724	-0.462937	1.52394	1.94628	1.02394	0.618869	-0.693085	-0.476819	-0.483789	-0.800776	0.526386	-0.471712	-1.17149	-1.73056
42078	TC1000002944.mm.1	Nup107 // Nup107 // Nup107 // Nup107 // Nup107 // Nup107 // Nup107 // Nup107 // Nup107 // Nup107	0.755504	0.845086	-1.07613	0.681978	3.61263	1.83163	4	0	0	0	0.56834	0.413528	0.90788	-0.728297	-1.48854	-0.632483	-0.170635	0.486009	-0.734229	0.793396	1.99934	1.34027	1.55564	-0.0779964	-0.0295252	-0.51881	-0.455515	-0.390147	-1.0842	-1.75403
40720	TC1000001579.mm.1	Prim1 // Prim1 // Prim1 // Prim1 // Prim1 // Prim1 // Prim1 // Prim1 // Prim1 // Prim1 // Prim1 // Prim1 // Prim1 // Prim1	0.673836	0.847194	-1.15917	0.375904	4.73857	1.83301	7	0	0	0	0.362733	1.01678	0.291562	-1.2998	-1.29451	0.0284158	-0.161041	-0.0288044	-0.307579	-0.135263	1.60964	1.87897	1.91573	-0.0301414	-0.126693	0.0936308	-0.336121	-0.789839	-1.14635	-1.54132
14057	TC0400001544.mm.1	Snrnp40 // Snrnp40 // Snrnp40 // Snrnp40 // Snrnp40 // Snrnp40 // Snrnp40 // Snrnp40 // Snrnp40 // Snrnp40 // Snrnp40 // Snrnp40	0.919831	0.546424	-0.915128	0.766728	3.75648	1.83496	2	0	0	0	0.591555	1.57826	0.114855	-1.02994	-1.28821	-0.837556	0.767421	-0.116039	0.753244	0.631507	1.21279	1.55661	1.22513	-0.0207667	-0.727341	-1.11166	-0.554475	-0.0313334	-1.31172	-1.40233
55390	TC1500000560.mm.1	Gm15945 // AC116393.2	0.776164	0.746523	-1.08075	0.441356	4.88416	1.85692	6	0	0	0	0.693243	0.126844	-0.515629	-0.450709	0.0623492	-0.630224	-0.527251	-0.358911	1.17992	1.55014	1.4507	0.947932	0.443901	-1.5085	1.40001	-1.28769	0.66613	-0.685414	-0.999897	-1.55695
57862	TC1600000709.mm.1	---	0.45344	0.90445	-1.40372	0.708185	3.48468	1.85716	4	0	0	0	-0.477797	0.172644	1.58204	0.473411	0.304809	-0.129636	-1.43975	-0.242753	0.317386	0.496965	1.69305	-0.610208	-0.0549446	1.48413	-0.443513	0.167691	0.917638	-0.706854	-1.38161	-2.12271
19542	TC0500002845.mm.1	Helq // Helq // Helq // Helq // Helq // Helq // Helq // Helq // Helq // Helq // Helq // Helq // Helq // Helq // Helq // Helq // Helq // Helq // Helq // Helq // Helq // Helq // Helq // Helq // Helq // Helq	0.539971	0.99551	-1.31942	0.812845	3.09121	1.8594	4	0	0	0	0.456336	1.72881	-0.773775	-0.54072	-1.16604	-0.526759	0.0390741	0.171769	-0.47696	0.105617	1.68584	1.05393	0.130433	0.127113	1.54605	0.145318	0.252237	-0.685697	-1.0367	-2.23588
59675	TC1700000359.mm.1	Ift140 // Ift140 // Ift140 // Ift140 // Ift140 // Ift140 // Ift140 // Ift140 // Ift140 // Ift140 // Ift140 // Ift140 // Ift140 // Ift140 // Ift140 // Ift140 // Ift140 // Ift140 // Ift140 // Ift140 // Ift140 // Ift140 // Ift140	0.564233	0.797855	-1.30621	0.435996	4.76165	1.87045	7	0	0	0	1.647	1.47916	-0.556462	-1.04179	-1.0992	-1.0754	0.117998	1.39282	0.486656	-0.130669	0.339306	0.684637	-0.098155	0.299341	0.951297	-0.413076	0.93516	-1.30761	-0.869518	-1.74151
47851	TC1200001231.mm.1	Traf3 // Traf3 // Traf3 // Traf3 // Traf3 // Traf3 // Traf3 // Traf3 // Traf3 // Traf3 // Traf3 // Traf3 // Traf3 // Traf3 // Traf3 // Traf3 // Traf3 // Traf3 // Traf3	0.942674	0.852948	-0.931834	0.587315	4.00639	1.87451	5	0	0	0	0.0406105	0.0989875	1.069	-0.867084	-0.312482	-1.67582	0.140818	-0.236466	0.722926	0.868037	2.58458	1.21458	-0.256655	0.453703	-0.890878	-0.471676	0.313321	-0.346365	-1.52098	-0.928158
14141	TC0400001628.mm.1	---	0.886938	0.831318	-0.991876	0.240834	5.46804	1.87881	7	0	0	0	1.68595	1.35987	0.718431	-1.41391	-1.84897	-0.0130322	-0.103016	-0.51511	0.0938533	-0.518588	1.27349	1.59556	0.189435	0.434739	-0.0751273	-0.361485	0.473536	-1.2595	-0.792605	-0.923527
5569	TC0200001741.mm.1	Bub1b // Bub1b // Bub1b // Bub1b // Bub1b // Bub1b // Bub1b // Bub1b // Bub1b // Bub1b // Bub1b // Bub1b	0.778311	0.772351	-1.10312	0.302703	5.52976	1.88143	7	0	0	0	0.199878	1.92683	0.246365	-1.20953	-1.29462	-1.02296	-0.234575	0.660597	0.65011	-0.207436	1.12169	1.51074	1.49754	-0.631031	0.0352176	-0.0834056	0.143934	-0.991039	-0.872433	-1.44587
34208	TC0900002372.mm.1	Gm26631	0.886259	0.928629	-1.00529	0.191617	5.13992	1.89155	7	0	0	0	1.80776	0.836154	1.58208	-0.113637	-0.34247	-1.03684	1.01827	-0.558728	1.21936	0.719156	-1.02853	1.06784	-0.486089	0.06294	-0.571623	-1.42505	0.265289	-1.19985	-0.816757	-0.999263
32108	TC0900000256.mm.1	---	0.814848	0.726264	-1.10748	0.703331	3.92195	1.92233	3	0	0	0	-0.136471	0.968484	2.00031	-1.17797	0.157723	-1.42038	-1.07735	-0.32158	0.692145	0.74851	0.086347	1.34461	0.490654	1.22945	0.0933682	-0.165244	-0.190183	-1.32601	-0.320825	-1.67561
65293	TC1900001456.mm.1	---	1.04799	0.807291	-0.876193	0.845598	3.34224	1.92418	3	0	0	0	0.747991	1.10255	1.50144	-0.827148	-0.26793	-1.07265	-0.471285	-1.13688	-0.11067	2.50941	0.831556	0.753635	0.0382601	-0.256877	-0.217704	-0.176889	-0.318227	0.0377906	-1.03568	-1.63069
43934	TC1100001586.mm.1	Cdc6 // Cdc6 // Cdc6 // Cdc6 // Cdc6 // Cdc6 // Cdc6 // Cdc6 // Cdc6 // Cdc6 // Cdc6 // Cdc6 // Cdc6 // Cdc6 // Cdc6 // Cdc6	0.900379	0.846298	-1.03506	0.0646074	6.00996	1.93544	6	0	0	0	0.980035	0.950568	0.262092	-1.32455	-1.05047	-0.503411	-0.453349	0.706008	-0.108183	0.231802	2.11248	1.87386	0.623078	-1.23819	-0.0544909	-0.125861	0.223749	-0.963202	-1.05362	-1.08835
5588	TC0200001760.mm.1	Rad51 // Rad51 // Rad51 // Rad51 // Rad51 // Rad51 // Rad51 // Rad51 // Rad51 // Rad51 // Rad51 // Rad51 // Rad51 // Rad51 // Rad51 // Rad51 // Rad51 // Rad51 // Rad51 // Rad51 // Rad51 // Rad51	0.730368	0.767952	-1.20741	0.439957	5.02396	1.93778	6	0	0	0	1.13429	1.40584	0.46742	-1.69826	-0.834185	-0.575536	0.619257	-0.48198	-0.227841	-0.138444	0.658455	1.81285	1.44215	-0.441752	-0.081962	0.292578	0.269352	-1.38867	-0.705783	-1.52778
15483	TC0400002978.mm.1	Scarna8 // Scarna8 // Scarna8	0.905524	0.998378	-1.05426	0.21563	4.93204	1.95978	7	0	0	0	2.6327	1.41065	0.308486	-0.43265	-0.98968	-0.491699	-0.60935	0.817276	0.851932	0.423335	-0.523418	1.23498	-0.105111	-0.0186839	-0.362477	-1.11552	0.131995	-1.07085	-0.830809	-1.26111
31837	TC0800003232.mm.1	Trmt1 // Trmt1 // Trmt1 // Trmt1 // Trmt1 // Trmt1	0.688738	0.659463	-1.28932	0.514237	5.10267	1.97806	4	0	0	0	1.30548	1.15817	0.242471	-0.62339	-1.67939	-0.110351	0.432682	-0.485372	0.166904	1.28937	-0.348155	1.00693	1.11278	0.326813	-1.27582	0.556705	0.792146	-0.714093	-1.44937	-1.7045
36849	TC0X00001668.mm.1	Piga // Piga // Piga // Piga // Piga // Piga // Piga // Piga // Piga // Piga // Piga // Piga // Piga // Piga // Piga // Piga // Piga // Piga // Piga	0.881148	0.924803	-1.09907	0.442202	4.57483	1.98022	7	0	0	0	1.38115	1.49071	0.35382	-0.631156	-0.736275	0.839361	-0.778534	-0.414825	1.53163	-0.955052	0.825771	1.54001	0.0867978	-0.877464	0.618004	-0.911996	-0.0647252	-1.11098	-0.651038	-1.5352
558	TC0100000561.mm.1	Rpe // Rpe // Rpe // Rpe // Rpe // Rpe // Rpe // Rpe // Rpe // Rpe // Rpe // Rpe // Rpe // Rpe	0.580025	0.891477	-1.40782	0.65092	3.93833	1.98784	5	0	0	0	2.32322	0.165585	0.618298	0.102582	0.203417	0.329554	-0.841023	1.78374	-0.413188	0.125844	0.195683	1.04473	-0.3529	-0.367091	-0.644757	-0.447921	0.397681	-0.958167	-1.11106	-2.15424
41775	TC1000002639.mm.1	Parpbp // Parpbp // Parpbp // Parpbp // Parpbp // Parpbp // Parpbp // Parpbp // Parpbp // Parpbp // Parpbp // Parpbp	1.0411	0.586275	-1.01097	0.660859	4.65083	2.05207	3	0	0	0	0.539244	1.21373	1.99829	-1.07963	-0.401599	-1.38772	0.147423	-0.819688	0.39652	0.650684	1.57149	0.917745	0.618117	-0.810441	0.238525	-0.580042	-0.179731	-0.624055	-0.63482	-1.77404
29170	TC0800000539.mm.1	Cenpu // Cenpu // Cenpu // Cenpu // Cenpu // Cenpu // Cenpu // Cenpu // Cenpu // Cenpu // Cenpu // Cenpu // Cenpu // Cenpu // Cenpu // Cenpu // Cenpu // Cenpu // Cenpu // Cenpu	0.668636	0.684412	-1.40998	0.580494	4.90971	2.07862	4	0	0	0	0.337209	1.38584	0.746529	-1.22669	-1.23913	-0.531191	-0.162805	-0.241386	-0.264387	-0.0395826	1.49699	1.01786	1.25541	0.346493	0.0423079	0.171904	1.13458	-1.42929	-0.820078	-1.98058
40112	TC1000000964.mm.1	---	1.06556	0.46075	-1.02284	0.283761	8.73451	2.08839	6	0	0	0	0.460218	1.69832	1.31841	-0.0601598	-0.0805344	-2.08039	-0.614732	-0.0155818	1.0096	1.07267	0.495403	1.40427	-0.104701	-1.14699	-0.0773351	-0.556608	0.346641	-1.1918	-0.695232	-1.18148
12396	TC0300003125.mm.1	---	1.05985	0.792371	-1.04679	0.421781	5.45766	2.10664	7	0	0	0	1.83942	0.714824	-0.239059	-0.764375	-0.731517	-0.514442	-0.50327	0.431272	1.09901	2.12629	0.634879	1.24359	-0.555144	-0.0989036	-0.219156	-1.23698	-0.0860686	-0.76475	-0.843941	-1.53167
24164	TC0700000153.mm.1	Zfp324 // Zfp324 // Zfp324 // Zfp324 // Zfp324 // Zfp324 // Zfp324 // Zfp324 // Zfp324 // Zfp324 // Zfp324 // Zfp324	0.930888	0.490426	-1.27208	0.426627	7.14625	2.20297	4	0	0	0	0.871711	0.818883	1.22399	-0.916669	-0.36025	-1.15186	0.394668	0.350236	1.27919	-0.0274835	0.873121	1.4768	1.0317	-0.839155	-1.16433	0.512608	-0.556929	-0.779872	-1.50058	-1.53578
